# Supplementary material for: DC targeted therapy breaks immune tolerance against neoantigens in refractory lung adenocarcinoma
Source: Research Square preprint supplement (doi:10.21203/rs.3.rs-2752957/v1), 2023-04-03
Supplement: Supplementary file 1 [file 95e3fff8d673d6c2e96bd4ff.xlsx]

## Sheet: All markers_ImmuneCells_Markers
gene	p_val	avg_log2FC	pct.1	pct.2	p_val_adj	cluster
Dapl1	0	4.04167	0.281	0.007	0	T cells
Cd3d	0	4.02713	0.963	0.078	0	T cells
Tcf7	0	3.95566	0.772	0.064	0	T cells
Trac	0	3.93156	0.839	0.061	0	T cells
Cd3e	0	3.91743	0.929	0.055	0	T cells
Cd8b1	0	3.76022	0.458	0.037	0	T cells
Lef1	0	3.75441	0.687	0.077	0	T cells
Cd3g	0	3.74938	0.941	0.073	0	T cells
Bcl11b	0	3.68047	0.738	0.051	0	T cells
Trbc2	0	3.5545	0.965	0.146	0	T cells
Cd6	0	3.47937	0.478	0.028	0	T cells
Cd28	0	3.47097	0.755	0.078	0	T cells
Cd5	0	3.39588	0.45	0.029	0	T cells
Ctla4	0	3.27888	0.347	0.059	0	T cells
Themis	0	3.27425	0.468	0.024	0	T cells
Trib2	0	3.17099	0.406	0.041	0	T cells
Cd8a	0	3.16276	0.402	0.034	0	T cells
Il7r	0	3.14371	0.767	0.095	0	T cells
Cd4	0	3.1133	0.294	0.019	0	T cells
Nsg2	0	3.05833	0.321	0.008	0	T cells
Lat	0	3.0316	0.703	0.088	0	T cells
Gramd3	0	2.97761	0.718	0.139	0	T cells
Tdrp	0	2.96287	0.28	0.005	0	T cells
Dusp10	0	2.95182	0.429	0.079	0	T cells
Inpp4b	0	2.88303	0.51	0.053	0	T cells
Itk	0	2.84624	0.738	0.116	0	T cells
S1pr1	0	2.81614	0.815	0.185	0	T cells
Igfbp4	0	2.76575	0.217	0.02	0	T cells
Sidt1	0	2.73171	0.449	0.058	0	T cells
Trat1	0	2.70071	0.21	0.008	0	T cells
Klk8	0	2.68693	0.382	0.037	0	T cells
Icos	0	2.67576	0.474	0.061	0	T cells
Ubash3a	0	2.66666	0.359	0.029	0	T cells
Tnfsf8	0	2.62971	0.195	0.012	0	T cells
Trbc1	0	2.55285	0.556	0.175	0	T cells
Rflnb	0	2.49204	0.36	0.06	0	T cells
Kbtbd11	0	2.46498	0.488	0.093	0	T cells
Cd27	0	2.45953	0.613	0.132	0	T cells
Thy1	0	2.40302	0.723	0.139	0	T cells
Slamf6	0	2.38619	0.487	0.1	0	T cells
Cd247	0	2.28957	0.6	0.119	0	T cells
Tox	0	2.28571	0.411	0.074	0	T cells
Chd3	0	2.27591	0.835	0.308	0	T cells
Dgka	0	2.27403	0.61	0.162	0	T cells
Prkcq	0	2.27023	0.568	0.109	0	T cells
Ablim1	0	2.25489	0.913	0.297	0	T cells
Cxcr3	0	2.23526	0.285	0.053	0	T cells
Faah	0	2.20233	0.291	0.04	0	T cells
Lck	0	2.20094	0.851	0.208	0	T cells
Skap1	0	2.19189	0.766	0.177	0	T cells
Fam169b	0	2.17791	0.311	0.037	0	T cells
Gm8369	0	2.17537	0.592	0.11	0	T cells
Als2cl	0	2.16824	0.176	0.013	0	T cells
Gimap3	0	2.16648	0.895	0.27	0	T cells
Ehd3	0	2.15847	0.265	0.033	0	T cells
Grap2	0	2.144	0.581	0.164	0	T cells
Fam78a	0	2.14355	0.402	0.101	0	T cells
Plcg1	0	2.12995	0.266	0.039	0	T cells
F2rl1	0	2.09534	0.192	0.014	0	T cells
Gtf2i	0	2.09124	0.592	0.201	0	T cells
Cd226	0	2.08673	0.378	0.072	0	T cells
Gm2682	0	2.07928	0.539	0.117	0	T cells
Ms4a4b	0	2.06	0.971	0.291	0	T cells
Ifi208	0	2.05159	0.3	0.045	0	T cells
Saraf	0	2.04157	0.905	0.469	0	T cells
Plcxd2	0	2.03646	0.345	0.075	0	T cells
Satb1	0	2.03139	0.723	0.273	0	T cells
Prkca	0	2.014	0.498	0.127	0	T cells
Rnf125	0	1.95616	0.422	0.094	0	T cells
Cd96	0	1.9531	0.315	0.058	0	T cells
Fam189b	0	1.93822	0.403	0.095	0	T cells
Scml4	0	1.91673	0.354	0.07	0	T cells
Mllt3	0	1.8495	0.45	0.131	0	T cells
Il27ra	0	1.83415	0.295	0.058	0	T cells
Gimap6	0	1.83124	0.902	0.345	0	T cells
Ipcef1	0	1.83114	0.527	0.163	0	T cells
Emb	0	1.81301	0.887	0.499	0	T cells
Smc4	0	1.80878	0.672	0.334	0	T cells
Tecpr1	0	1.77109	0.543	0.174	0	T cells
Ms4a6b	0	1.76336	0.87	0.4	0	T cells
Txk	0	1.74936	0.795	0.232	0	T cells
Ccr7	0	1.741	0.602	0.146	0	T cells
Smad7	0	1.73462	0.697	0.262	0	T cells
Zap70	0	1.72283	0.393	0.1	0	T cells
Vps37b	0	1.67668	0.943	0.591	0	T cells
Tnik	0	1.67619	0.399	0.103	0	T cells
Rpl12	0	1.64371	0.996	0.858	0	T cells
Rapgef6	0	1.63068	0.812	0.443	0	T cells
Utrn	0	1.60477	0.669	0.314	0	T cells
Rasal3	0	1.604	0.526	0.185	0	T cells
Ets1	0	1.60301	0.955	0.397	0	T cells
Cmah	0	1.58417	0.511	0.157	0	T cells
Ptpn22	0	1.575	0.719	0.332	0	T cells
Srpk1	0	1.57281	0.646	0.301	0	T cells
Gimap4	0	1.54897	0.839	0.291	0	T cells
Pdcd4	0	1.50976	0.929	0.558	0	T cells
Gm26917	0	1.4526	0.724	0.403	0	T cells
Cd2	0	1.35846	0.758	0.287	0	T cells
Rplp1	0	1.27479	0.998	0.965	0	T cells
Hcst	0	1.23533	0.882	0.514	0	T cells
Rpl13a	0	1.22659	0.997	0.891	0	T cells
Sept1	0	1.22575	0.787	0.324	0	T cells
Gimap1	0	1.2177	0.732	0.286	0	T cells
Rpl36a	0	1.19443	0.988	0.845	0	T cells
Rps15a	0	1.19439	0.997	0.928	0	T cells
Rps24	0	1.18796	0.998	0.948	0	T cells
Rpl5	0	1.16671	0.973	0.821	0	T cells
Wdr89	0	1.15179	0.849	0.612	0	T cells
Ltb	0	1.11315	0.842	0.407	0	T cells
Rps20	0	1.11069	0.998	0.913	0	T cells
Rps7	0	1.08105	0.996	0.906	0	T cells
Rps27	0	1.0622	0.998	0.994	0	T cells
Rpl17	0	1.05506	0.997	0.931	0	T cells
Rps16	0	1.04586	0.998	0.973	0	T cells
Rps21	0	1.03975	0.999	0.98	0	T cells
Eef1b2	0	1.01727	0.977	0.833	0	T cells
Rpl30	0	1.0157	0.998	0.957	0	T cells
Atp1b3	1.00057e-307	1.11205	0.87	0.599	1.86986e-303	T cells
Pde4d	9.0712e-307	1.94985	0.251	0.041	1.69523e-302	T cells
Sesn3	7.07996e-306	1.66358	0.497	0.179	1.3231e-301	T cells
Rnf138	2.39922e-304	1.67427	0.572	0.253	4.48366e-300	T cells
Art2b	5.81793e-303	2.0239	0.172	0.015	1.08726e-298	T cells
Gpr183	2.83511e-301	1.34097	0.633	0.274	5.29826e-297	T cells
Camk4	5.52778e-298	1.93782	0.206	0.026	1.03303e-293	T cells
Fam102a	1.51925e-295	1.62602	0.422	0.128	2.83918e-291	T cells
BE692007	8.76902e-294	1.45391	0.396	0.108	1.63875e-289	T cells
Pik3ip1	6.26569e-290	1.85647	0.235	0.037	1.17093e-285	T cells
Peli1	9.7532e-286	1.17892	0.786	0.499	1.82268e-281	T cells
Actn1	4.26425e-278	1.04534	0.562	0.206	7.96904e-274	T cells
Gimap9	1.24811e-272	1.41884	0.474	0.164	2.33247e-268	T cells
P2ry10	1.54109e-272	1.21539	0.626	0.284	2.87998e-268	T cells
Itpkb	7.34759e-270	1.32321	0.647	0.334	1.37312e-265	T cells
Izumo1r	1.3344e-264	2.13961	0.12	0.005	2.49374e-260	T cells
Foxo1	1.6488e-261	1.5145	0.481	0.187	3.08128e-257	T cells
Cd40lg	6.94891e-259	1.93841	0.133	0.008	1.29861e-254	T cells
A930005H10Rik	4.25125e-256	1.84187	0.289	0.07	7.94474e-252	T cells
Mgst2	1.00423e-255	1.73304	0.291	0.069	1.8767e-251	T cells
Ikzf2	1.1142e-253	2.9007	0.303	0.08	2.08221e-249	T cells
Crlf3	6.02096e-253	1.29069	0.766	0.524	1.1252e-248	T cells
Tnfrsf18	3.52548e-250	1.75476	0.396	0.131	6.58842e-246	T cells
Stat4	2.10922e-249	1.02672	0.641	0.289	3.94171e-245	T cells
Bicdl1	1.1124e-248	1.74576	0.172	0.021	2.07886e-244	T cells
Galnt6	5.42367e-246	1.7163	0.366	0.117	1.01358e-241	T cells
Ift80	7.87154e-245	2.03713	0.218	0.039	1.47103e-240	T cells
Gata3	1.72038e-243	1.48311	0.361	0.108	3.21505e-239	T cells
Itga6	5.25982e-243	1.81709	0.276	0.066	9.82955e-239	T cells
Bcl2	1.29915e-242	1.57031	0.562	0.269	2.42786e-238	T cells
Gm15472	1.42443e-242	1.65131	0.309	0.082	2.66197e-238	T cells
Pdk1	1.19482e-232	1.83353	0.292	0.078	2.23288e-228	T cells
Cep97	3.95964e-232	1.84327	0.233	0.048	7.39978e-228	T cells
Zc3hav1	1.38884e-230	1.12715	0.736	0.48	2.59546e-226	T cells
St8sia1	4.13658e-229	1.9126	0.169	0.023	7.73044e-225	T cells
Cxcr6	4.73591e-221	1.59008	0.211	0.038	8.85048e-217	T cells
Apol7e	6.31325e-218	1.5746	0.213	0.041	1.17982e-213	T cells
2010016I18Rik	2.57933e-217	1.76799	0.184	0.03	4.82025e-213	T cells
Pmepa1	3.11641e-217	1.66226	0.319	0.095	5.82394e-213	T cells
Dtx1	1.18235e-216	1.82749	0.181	0.029	2.20958e-212	T cells
Gm10125	2.61283e-215	1.63803	0.146	0.017	4.88285e-211	T cells
Tesc	4.49398e-215	1.8285	0.189	0.033	8.39835e-211	T cells
Pde3b	9.00892e-213	1.5386	0.38	0.137	1.68359e-208	T cells
Slamf1	9.44659e-211	1.87247	0.155	0.021	1.76538e-206	T cells
Sit1	3.94812e-210	1.74068	0.152	0.02	7.37825e-206	T cells
Gimap8	3.1418e-207	1.14338	0.448	0.171	5.87139e-203	T cells
Kmt2a	9.87027e-206	1.04522	0.718	0.462	1.84456e-201	T cells
Hdgfl3	1.39222e-205	1.56435	0.135	0.015	2.60179e-201	T cells
Il21r	3.54166e-203	1.38865	0.426	0.174	6.61866e-199	T cells
Kcnn4	8.26114e-197	1.63348	0.315	0.105	1.54384e-192	T cells
Vipr1	2.07261e-195	1.58334	0.13	0.014	3.87329e-191	T cells
Klhdc1	7.16688e-195	1.62761	0.195	0.04	1.33935e-190	T cells
Cblb	2.84607e-193	1.18824	0.603	0.336	5.31874e-189	T cells
Slco3a1	4.3275e-193	1.28438	0.403	0.159	8.08723e-189	T cells
Dnah8	2.9832e-189	1.62613	0.211	0.047	5.57501e-185	T cells
Hdac7	1.11153e-187	1.26611	0.461	0.208	2.07723e-183	T cells
Rinl	9.91013e-187	1.03733	0.64	0.364	1.85201e-182	T cells
A930024E05Rik	5.22329e-186	1.41533	0.237	0.06	9.76129e-182	T cells
Pitpnc1	7.68867e-186	1.12272	0.489	0.224	1.43686e-181	T cells
Gstp3	1.91997e-185	1.55507	0.172	0.031	3.58803e-181	T cells
Gimap1os	6.90833e-185	1.54067	0.254	0.069	1.29103e-180	T cells
Sh2d1a	1.64852e-184	1.26479	0.342	0.115	3.08075e-180	T cells
Sh2d2a	3.60243e-183	1.0232	0.461	0.189	6.73222e-179	T cells
Celsr1	5.77084e-180	1.48954	0.107	0.01	1.07845e-175	T cells
4930417O13Rik	7.79298e-180	1.39882	0.105	0.009	1.45635e-175	T cells
4932438A13Rik	7.97047e-179	1.00032	0.647	0.4	1.48952e-174	T cells
Rasgrp1	1.73563e-177	1.28708	0.46	0.214	3.24355e-173	T cells
Pced1b	1.27532e-176	1.48327	0.278	0.086	2.38331e-172	T cells
Dennd2d	1.88065e-176	1.54453	0.244	0.068	3.51456e-172	T cells
Gprin3	3.82537e-172	1.49532	0.176	0.035	7.14885e-168	T cells
Zeb1	5.71504e-172	1.28754	0.37	0.145	1.06803e-167	T cells
Esyt2	7.72908e-172	1.19526	0.509	0.265	1.44441e-167	T cells
Bzw2	1.3333e-171	1.44182	0.394	0.175	2.49166e-167	T cells
Itm2a	1.72051e-171	1.59455	0.153	0.026	3.21528e-167	T cells
Tespa1	2.19862e-167	1.31138	0.317	0.111	4.10877e-163	T cells
Rgs10	2.01143e-166	1.09566	0.54	0.298	3.75896e-162	T cells
Pglyrp2	1.36848e-165	1.46023	0.214	0.054	2.55742e-161	T cells
Aebp2	3.34041e-164	1.14225	0.545	0.312	6.24255e-160	T cells
Tagap	7.76561e-164	1.01199	0.445	0.204	1.45124e-159	T cells
Tnfrsf4	5.41399e-162	2.46874	0.125	0.018	1.01177e-157	T cells
Tbxa2r	5.41843e-162	1.40176	0.121	0.016	1.0126e-157	T cells
Aak1	6.04357e-161	1.24341	0.424	0.198	1.12942e-156	T cells
Gm12840	1.20015e-160	1.16817	0.214	0.054	2.24285e-156	T cells
Slc12a7	1.43294e-158	1.51777	0.237	0.071	2.67787e-154	T cells
Il6st	4.1738e-158	1.50573	0.376	0.173	7.8e-154	T cells
Adgrl1	6.51309e-158	1.53314	0.149	0.028	1.21717e-153	T cells
Jakmip1	1.27131e-157	1.28496	0.298	0.102	2.37583e-153	T cells
Axin2	9.32032e-156	1.46074	0.118	0.016	1.74178e-151	T cells
Ar	9.50503e-156	1.40345	0.17	0.036	1.7763e-151	T cells
Snhg12	3.36756e-155	1.26761	0.429	0.21	6.29329e-151	T cells
Tent5c	1.6175e-153	1.46811	0.228	0.067	3.02279e-149	T cells
Tmem71	6.52805e-153	1.09902	0.556	0.321	1.21996e-148	T cells
Gpr174	9.54204e-153	1.13814	0.321	0.116	1.78322e-148	T cells
Prkch	1.46598e-151	1.0961	0.486	0.259	2.73962e-147	T cells
Cpm	4.40667e-150	1.42103	0.195	0.048	8.23518e-146	T cells
Nlrc3	1.50041e-149	1.2487	0.252	0.078	2.80397e-145	T cells
Thada	1.09598e-147	1.42404	0.216	0.062	2.04817e-143	T cells
Ifi206	4.33128e-146	1.3715	0.288	0.105	8.09429e-142	T cells
Fam241a	1.05612e-144	1.6921	0.376	0.184	1.97368e-140	T cells
Btbd11	3.31778e-144	1.28229	0.104	0.013	6.20026e-140	T cells
Crbn	4.88101e-143	1.37276	0.317	0.129	9.12164e-139	T cells
Igflr1	2.44839e-141	1.55507	0.148	0.031	4.57555e-137	T cells
Pitpnm2	5.32909e-140	1.35425	0.146	0.03	9.959e-136	T cells
Klhl6	5.37698e-140	1.1644	0.455	0.242	1.00485e-135	T cells
Pja1	2.21098e-139	1.52415	0.247	0.085	4.13189e-135	T cells
Abhd8	4.33457e-137	1.40864	0.217	0.067	8.10044e-133	T cells
Dph5	1.26496e-135	1.41562	0.26	0.095	2.36395e-131	T cells
Sntb1	3.43229e-135	1.42628	0.13	0.025	6.41425e-131	T cells
Il18r1	2.88323e-132	1.01172	0.403	0.181	5.38819e-128	T cells
Ppp1r16b	7.56548e-129	1.08609	0.324	0.132	1.41384e-124	T cells
Abcb9	8.49978e-129	1.37615	0.167	0.042	1.58844e-124	T cells
Gm20186	1.3179e-128	1.02913	0.211	0.064	2.46288e-124	T cells
Gpr68	1.97508e-128	1.4466	0.223	0.074	3.69103e-124	T cells
Fgf13	2.15062e-128	1.29673	0.102	0.015	4.01908e-124	T cells
Aopep	3.21009e-127	1.47443	0.25	0.093	5.99901e-123	T cells
Bcl9l	6.97324e-127	1.20423	0.283	0.111	1.30316e-122	T cells
Nlk	1.17264e-125	1.29495	0.27	0.105	2.19143e-121	T cells
Pdcd1	1.18374e-125	1.77608	0.117	0.021	2.21217e-121	T cells
Prkd2	1.47465e-125	1.05378	0.291	0.113	2.75582e-121	T cells
Tnfrsf26	4.77157e-125	1.09096	0.182	0.049	8.91711e-121	T cells
Ifi213	3.52418e-124	1.32074	0.253	0.094	6.58598e-120	T cells
Gbp4	1.13901e-123	1.1435	0.311	0.129	2.12858e-119	T cells
Slc25a40	7.2743e-123	1.43173	0.229	0.079	1.35942e-118	T cells
Gm30054	2.20101e-122	1.18197	0.192	0.056	4.11324e-118	T cells
Mdn1	2.88542e-120	1.25146	0.3	0.128	5.39228e-116	T cells
Ttc28	5.06885e-120	1.36714	0.136	0.03	9.47266e-116	T cells
Pde7a	7.39192e-118	1.03547	0.409	0.211	1.3814e-113	T cells
Smco4	1.46393e-115	1.52432	0.169	0.049	2.73579e-111	T cells
Hs3st3b1	1.69816e-115	1.26732	0.195	0.062	3.17351e-111	T cells
Odc1	3.59086e-115	1.48755	0.48	0.293	6.7106e-111	T cells
Xlr4b	1.45486e-112	1.25552	0.168	0.048	2.71884e-108	T cells
Trp53inp1	1.65246e-112	1.06285	0.397	0.204	3.08812e-108	T cells
Ttc3	5.84794e-112	1.18338	0.311	0.141	1.09286e-107	T cells
Prkcz	1.01485e-109	1.32108	0.127	0.029	1.89655e-105	T cells
Pim2	1.22709e-108	1.13556	0.187	0.059	2.29319e-104	T cells
Phf6	1.11684e-106	1.09542	0.39	0.21	2.08715e-102	T cells
Maml2	1.50804e-106	1.2045	0.177	0.055	2.81822e-102	T cells
Rab3ip	1.52366e-106	1.41988	0.184	0.06	2.84741e-102	T cells
Rora	2.6319e-105	1.51094	0.207	0.073	4.91849e-101	T cells
Gm43065	7.12964e-104	1.20078	0.129	0.031	1.33239e-99	T cells
Acsbg1	2.29085e-103	1.31057	0.115	0.025	4.28113e-99	T cells
Tmem64	2.93639e-103	1.40353	0.258	0.108	5.48752e-99	T cells
Ikbke	1.75594e-102	1.09241	0.304	0.142	3.2815e-98	T cells
Galnt10	3.35273e-102	1.21857	0.306	0.148	6.26558e-98	T cells
AI480526	7.57243e-100	1.35841	0.167	0.052	1.41514e-95	T cells
Ifi214	2.14488e-99	1.05453	0.359	0.187	4.00835e-95	T cells
Rnf19a	9.20196e-99	1.21446	0.273	0.123	1.71966e-94	T cells
Znrf1	2.63854e-96	1.06755	0.375	0.208	4.93091e-92	T cells
2810001G20Rik	7.02121e-96	1.21557	0.19	0.066	1.31212e-91	T cells
Fbxo32	1.09424e-95	1.26006	0.155	0.047	2.04492e-91	T cells
Adk	1.68276e-95	1.49357	0.22	0.09	3.14475e-91	T cells
Frat2	8.47434e-93	1.14981	0.205	0.078	1.58369e-88	T cells
Usp28	3.25495e-90	1.25689	0.125	0.034	6.08285e-86	T cells
Crim1	1.62383e-89	1.14518	0.182	0.064	3.03462e-85	T cells
Ifit1bl1	1.86091e-89	1.23328	0.103	0.023	3.47766e-85	T cells
Atxn1	2.665e-89	1.16727	0.267	0.121	4.98035e-85	T cells
Prrt1	4.57921e-89	1.07374	0.102	0.023	8.55762e-85	T cells
Slc17a9	9.64355e-89	1.19933	0.119	0.031	1.80219e-84	T cells
Fam118a	5.50186e-86	1.23508	0.111	0.028	1.02819e-81	T cells
Tanc1	4.2464e-81	1.09052	0.129	0.038	7.93568e-77	T cells
Rhobtb2	1.35154e-80	1.14784	0.17	0.062	2.52576e-76	T cells
Tnfsf10	1.67768e-80	1.16434	0.122	0.035	3.13525e-76	T cells
Bend4	9.33125e-80	1.10679	0.114	0.031	1.74382e-75	T cells
Slc16a1	3.35419e-76	1.13332	0.119	0.035	6.26831e-72	T cells
Impdh1	1.50183e-74	1.07927	0.195	0.081	2.80662e-70	T cells
Slain1	1.74101e-74	1.04715	0.15	0.052	3.25359e-70	T cells
I730030J21Rik	2.62032e-73	1.10889	0.135	0.044	4.89685e-69	T cells
Ldlrad4	1.35294e-70	1.20723	0.15	0.055	2.52837e-66	T cells
Ndrg3	9.92134e-70	1.25122	0.215	0.1	1.8541e-65	T cells
Xcl1	1.80817e-65	1.2874	0.14	0.049	3.37911e-61	T cells
Gbp8	1.02583e-64	1.01738	0.198	0.09	1.91707e-60	T cells
Rcbtb1	1.99714e-63	1.03788	0.153	0.061	3.73226e-59	T cells
Sacs	3.09727e-63	1.00856	0.198	0.091	5.78818e-59	T cells
Nxpe3	9.87465e-63	1.11763	0.113	0.036	1.84537e-58	T cells
Itgae	2.82765e-62	1.11709	0.1	0.029	5.28432e-58	T cells
Thap3	8.70976e-61	1.01023	0.249	0.133	1.62768e-56	T cells
A930006K02Rik	1.47266e-59	1.00832	0.169	0.073	2.75211e-55	T cells
Zfp260	3.60473e-59	1.01849	0.243	0.13	6.73651e-55	T cells
Dbf4	2.65177e-58	1.01508	0.255	0.14	4.95563e-54	T cells
Tbcel	1.68024e-51	1.00235	0.195	0.099	3.14004e-47	T cells
Myb	9.93838e-51	1.30335	0.133	0.055	1.85728e-46	T cells
Gbp6	4.21969e-49	1.05523	0.138	0.059	7.88575e-45	T cells
Klra8	0	5.55745	0.573	0.029	0	NK cells
Klra4	0	5.49803	0.555	0.024	0	NK cells
Gzma	0	5.42103	0.972	0.21	0	NK cells
Prf1	0	5.39665	0.937	0.078	0	NK cells
Ncr1	0	4.95703	0.881	0.029	0	NK cells
Klrb1c	0	4.92652	0.902	0.037	0	NK cells
Klra9	0	4.70008	0.5	0.02	0	NK cells
Klre1	0	4.61995	0.95	0.058	0	NK cells
Ccl5	0	4.50929	0.99	0.372	0	NK cells
Klra3	0	4.22719	0.352	0.018	0	NK cells
Klra7	0	4.2034	0.585	0.038	0	NK cells
Gzmb	0	4.13515	0.725	0.051	0	NK cells
Klri2	0	4.11283	0.538	0.025	0	NK cells
Cma1	0	4.04307	0.473	0.012	0	NK cells
Klrg1	0	4.00355	0.664	0.045	0	NK cells
Serpinb9	0	3.88813	0.879	0.133	0	NK cells
Eomes	0	3.8437	0.676	0.054	0	NK cells
Nkg7	0	3.8375	0.987	0.207	0	NK cells
Serpinb6b	0	3.81108	0.822	0.102	0	NK cells
Klrb1b	0	3.78144	0.484	0.04	0	NK cells
Serpinb9b	0	3.67794	0.246	0.007	0	NK cells
Spry2	0	3.64379	0.63	0.045	0	NK cells
Klrc2	0	3.58086	0.641	0.046	0	NK cells
Styk1	0	3.5531	0.348	0.008	0	NK cells
Klrb1a	0	3.53758	0.372	0.009	0	NK cells
Itga2	0	3.5307	0.478	0.021	0	NK cells
AW112010	0	3.52562	0.998	0.529	0	NK cells
Klrk1	0	3.51306	0.94	0.143	0	NK cells
Sytl3	0	3.43063	0.68	0.077	0	NK cells
Klrd1	0	3.41814	0.941	0.195	0	NK cells
Il2rb	0	3.41587	0.967	0.192	0	NK cells
Klrb1f	0	3.39424	0.494	0.037	0	NK cells
Car2	0	3.34381	0.552	0.049	0	NK cells
Fasl	0	3.33983	0.59	0.055	0	NK cells
Ctla2b	0	3.28331	0.586	0.071	0	NK cells
Adamts14	0	3.21851	0.362	0.011	0	NK cells
Tbx21	0	3.15728	0.509	0.051	0	NK cells
Gm19585	0	3.08005	0.722	0.113	0	NK cells
Gem	0	3.03373	0.536	0.073	0	NK cells
Ctsw	0	3.01622	0.894	0.168	0	NK cells
Klrc1	0	3.00592	0.384	0.043	0	NK cells
Samd3	0	2.99088	0.442	0.041	0	NK cells
Ifng	0	2.97394	0.388	0.038	0	NK cells
Arsb	0	2.95322	0.615	0.102	0	NK cells
Il12rb2	0	2.87352	0.39	0.052	0	NK cells
Atp1b1	0	2.86601	0.721	0.092	0	NK cells
Camk2n1	0	2.86316	0.38	0.039	0	NK cells
Khdc1a	0	2.73954	0.238	0.007	0	NK cells
Dapk2	0	2.72242	0.308	0.02	0	NK cells
Gpc1	0	2.68742	0.322	0.027	0	NK cells
Il18rap	0	2.68722	0.798	0.173	0	NK cells
Ctla2a	0	2.66768	0.707	0.143	0	NK cells
Ugcg	0	2.66116	0.933	0.374	0	NK cells
Cst7	0	2.63205	0.433	0.066	0	NK cells
Ccr5	0	2.62488	0.686	0.159	0	NK cells
Dok2	0	2.56829	0.593	0.122	0	NK cells
Ifitm10	0	2.53169	0.306	0.033	0	NK cells
Qrfp	0	2.53145	0.288	0.02	0	NK cells
Sytl2	0	2.53049	0.396	0.049	0	NK cells
Lgals1	0	2.52643	0.966	0.522	0	NK cells
Chsy1	0	2.51923	0.635	0.165	0	NK cells
Pear1	0	2.51852	0.339	0.038	0	NK cells
Clnk	0	2.51686	0.268	0.018	0	NK cells
Osbpl3	0	2.50853	0.443	0.086	0	NK cells
Sh2d2a	0	2.49007	0.712	0.156	0	NK cells
Txk	0	2.47104	0.922	0.228	0	NK cells
Wdr95	0	2.44463	0.259	0.021	0	NK cells
Phactr3	0	2.42862	0.176	0.002	0	NK cells
Tmem37	0	2.42493	0.274	0.028	0	NK cells
Irf8	0	2.40126	0.952	0.432	0	NK cells
Peak1	0	2.33365	0.585	0.159	0	NK cells
Arl4d	0	2.3233	0.223	0.025	0	NK cells
Cd7	0	2.2663	0.479	0.119	0	NK cells
Il18r1	0	2.25838	0.67	0.143	0	NK cells
Baiap3	0	2.24328	0.251	0.027	0	NK cells
Car5b	0	2.22853	0.225	0.026	0	NK cells
Borcs7	0	2.20136	0.434	0.137	0	NK cells
1700025G04Rik	0	2.18439	0.516	0.158	0	NK cells
Pde2a	0	2.18144	0.549	0.128	0	NK cells
Gimap5	0	2.17558	0.66	0.182	0	NK cells
Gimap7	0	2.17333	0.587	0.147	0	NK cells
Gpx8	0	2.15421	0.161	0.005	0	NK cells
Dab2ip	0	2.15015	0.242	0.026	0	NK cells
Ms4a4b	0	2.10566	0.977	0.311	0	NK cells
Sh2d1a	0	2.09373	0.468	0.101	0	NK cells
Pik3r1	0	2.08606	0.807	0.409	0	NK cells
Cd200r4	0	2.07698	0.283	0.049	0	NK cells
Tmsb15a	0	2.03355	0.139	0.005	0	NK cells
Rac3	0	2.01006	0.161	0.01	0	NK cells
Gimap4	0	2.00911	0.891	0.298	0	NK cells
Lax1	0	1.96736	0.406	0.094	0	NK cells
Hsd11b1	0	1.93025	0.617	0.202	0	NK cells
Gm43647	0	1.92118	0.145	0.005	0	NK cells
Rgs1	0	1.86751	0.733	0.292	0	NK cells
Gm2682	0	1.82939	0.516	0.134	0	NK cells
Sept1	0	1.82696	0.855	0.327	0	NK cells
Gimap8	0	1.75845	0.539	0.164	0	NK cells
Ptprcap	0	1.75291	0.912	0.377	0	NK cells
Id2	0	1.74953	0.83	0.418	0	NK cells
Sept11	0	1.74481	0.706	0.327	0	NK cells
Hcst	0	1.72755	0.928	0.517	0	NK cells
S100a10	0	1.72658	0.97	0.612	0	NK cells
Runx3	0	1.69137	0.836	0.425	0	NK cells
Lck	0	1.65755	0.773	0.24	0	NK cells
Gimap1	0	1.65717	0.788	0.29	0	NK cells
Gimap9	0	1.65197	0.514	0.167	0	NK cells
Pycard	0	1.64326	0.767	0.49	0	NK cells
Stat4	0	1.62378	0.726	0.285	0	NK cells
Mxd4	0	1.60836	0.675	0.332	0	NK cells
S100a13	0	1.59546	0.861	0.572	0	NK cells
Dnajc15	0	1.48557	0.738	0.422	0	NK cells
Ywhaq	0	1.47631	0.831	0.519	0	NK cells
Epsti1	0	1.46318	0.805	0.517	0	NK cells
Cd2	0	1.42281	0.744	0.303	0	NK cells
Jak1	0	1.4161	0.971	0.769	0	NK cells
Fyn	0	1.38729	0.771	0.405	0	NK cells
Ahnak	0	1.37653	0.991	0.638	0	NK cells
Vps37b	0	1.36219	0.945	0.601	0	NK cells
Skap1	0	1.34595	0.639	0.215	0	NK cells
H2afz	0	1.25929	0.972	0.753	0	NK cells
Gimap3	0	1.24327	0.786	0.307	0	NK cells
Spn	0	1.21869	0.839	0.451	0	NK cells
Itgb1	0	1.21814	0.931	0.601	0	NK cells
Pdcd4	0	1.17584	0.894	0.575	0	NK cells
Ifngr1	0	1.11731	0.958	0.709	0	NK cells
H2-Q7	0	1.08146	0.931	0.668	0	NK cells
Selplg	0	1.06795	0.957	0.757	0	NK cells
Myl6	0	1.03543	0.99	0.945	0	NK cells
Ncald	1.15298e-307	2.1107	0.216	0.026	2.15469e-303	NK cells
Rinl	1.801e-307	1.38988	0.713	0.36	3.36571e-303	NK cells
Lat2	2.2339e-305	1.61118	0.612	0.269	4.17472e-301	NK cells
Arap2	9.94802e-305	1.64036	0.574	0.218	1.85909e-300	NK cells
Ptpn22	2.12511e-304	1.36944	0.708	0.346	3.97141e-300	NK cells
Lpin1	6.40146e-304	2.07336	0.411	0.118	1.1963e-299	NK cells
Gm33104	1.64664e-302	2.11965	0.259	0.041	3.07724e-298	NK cells
Rnf43	3.96524e-290	2.06181	0.207	0.025	7.41025e-286	NK cells
Padi2	1.79014e-288	1.96555	0.417	0.129	3.34542e-284	NK cells
Cd160	2.8146e-284	2.11855	0.246	0.039	5.25992e-280	NK cells
Sla2	4.20018e-281	1.84479	0.337	0.08	7.84929e-277	NK cells
Plscr4	8.19196e-281	2.0773	0.161	0.013	1.53091e-276	NK cells
As3mt	8.97733e-281	2.26656	0.266	0.05	1.67768e-276	NK cells
Pogk	4.01141e-279	2.17093	0.296	0.064	7.49652e-275	NK cells
Anxa6	2.59231e-278	1.2535	0.767	0.46	4.84451e-274	NK cells
Tnfrsf9	3.52833e-275	2.06646	0.239	0.038	6.59375e-271	NK cells
D16Ertd472e	3.30923e-273	1.56477	0.629	0.302	6.1843e-269	NK cells
Enpp4	3.11964e-266	2.08791	0.291	0.064	5.82997e-262	NK cells
Klra1	3.33129e-265	3.07966	0.173	0.018	6.22552e-261	NK cells
Nedd4	4.47476e-264	1.70975	0.369	0.102	8.36244e-260	NK cells
Slamf7	9.56577e-262	1.61572	0.484	0.178	1.78765e-257	NK cells
Zfpm1	2.86217e-258	1.90794	0.297	0.067	5.34883e-254	NK cells
Atp2b4	5.25512e-256	1.64557	0.423	0.139	9.82077e-252	NK cells
Kcnab2	5.8761e-255	1.66976	0.538	0.245	1.09813e-250	NK cells
Clip4	7.83775e-255	1.61721	0.107	0.003	1.46472e-250	NK cells
Tnfsf12	2.22892e-249	1.92489	0.375	0.118	4.16541e-245	NK cells
Esyt1	1.70675e-248	1.42375	0.675	0.384	3.18958e-244	NK cells
Nrarp	4.48304e-248	1.87306	0.233	0.041	8.3779e-244	NK cells
Pdgfb	6.35574e-246	1.56416	0.422	0.14	1.18776e-241	NK cells
Trdv2-2	2.22115e-244	1.74575	0.124	0.007	4.15089e-240	NK cells
Abracl	7.99143e-242	1.12794	0.811	0.634	1.49344e-237	NK cells
Xcl1	2.12622e-237	2.68373	0.221	0.038	3.97347e-233	NK cells
Pitpnc1	2.21133e-237	1.53141	0.528	0.225	4.13254e-233	NK cells
Agpat3	1.11892e-236	1.73243	0.439	0.163	2.09104e-232	NK cells
H2-Q6	1.34985e-236	1.23493	0.694	0.376	2.5226e-232	NK cells
Ccnd2	3.25864e-236	1.1744	0.834	0.503	6.08974e-232	NK cells
S1pr5	2.56595e-235	1.75507	0.346	0.098	4.79525e-231	NK cells
Klhl30	7.06347e-234	1.47215	0.101	0.003	1.32002e-229	NK cells
Fhl2	1.57937e-233	1.84715	0.188	0.027	2.95152e-229	NK cells
Tbc1d10c	1.97091e-229	1.31105	0.583	0.268	3.68323e-225	NK cells
Hist1h1e	1.49378e-228	1.09571	0.582	0.271	2.79158e-224	NK cells
Cd244a	1.09667e-225	1.38025	0.537	0.236	2.04945e-221	NK cells
Kcnip3	8.61692e-225	1.8352	0.169	0.022	1.61033e-220	NK cells
Rab37	1.01979e-223	1.75248	0.271	0.063	1.90578e-219	NK cells
Chn2	5.30572e-222	1.80224	0.307	0.084	9.91533e-218	NK cells
Dnajb4	1.98736e-220	1.73528	0.349	0.107	3.71397e-216	NK cells
Trdv4	2.12294e-218	1.3707	0.136	0.012	3.96734e-214	NK cells
Ppm1j	1.16003e-212	1.82008	0.182	0.028	2.16786e-208	NK cells
Ptpn4	2.86048e-212	1.88327	0.3	0.083	5.34566e-208	NK cells
Hopx	3.34384e-209	1.35617	0.545	0.257	6.24896e-205	NK cells
Gm33782	9.98776e-209	1.50188	0.106	0.006	1.86651e-204	NK cells
Sept6	3.07841e-206	1.28804	0.586	0.296	5.75293e-202	NK cells
Gpr171	7.57665e-200	1.15525	0.496	0.209	1.41592e-195	NK cells
Cuedc1	4.34104e-199	1.7071	0.148	0.018	8.11253e-195	NK cells
Gm14029	2.90908e-198	1.73799	0.173	0.027	5.43649e-194	NK cells
Tnik	4.64273e-196	1.49827	0.361	0.118	8.67633e-192	NK cells
Gata3	1.8756e-194	1.09086	0.361	0.116	3.50513e-190	NK cells
Prkcq	2.32841e-194	1.35088	0.412	0.149	4.35133e-190	NK cells
Bhlhe40	1.63713e-193	1.02315	0.66	0.357	3.05946e-189	NK cells
Rhoc	2.24357e-191	1.53338	0.274	0.073	4.19278e-187	NK cells
Eya1	8.46831e-191	1.60143	0.117	0.01	1.58256e-186	NK cells
Sulf2	5.50637e-190	1.51516	0.373	0.135	1.02903e-185	NK cells
Pld3	5.46762e-188	1.21791	0.455	0.186	1.02179e-183	NK cells
Itih5	1.33732e-187	1.66063	0.143	0.018	2.49918e-183	NK cells
Cd247	4.28354e-187	1.19965	0.43	0.162	8.00508e-183	NK cells
Tmem163	1.25501e-186	1.44019	0.239	0.055	2.34536e-182	NK cells
Osbpl5	1.39771e-186	1.63771	0.187	0.034	2.61205e-182	NK cells
Ikzf3	1.89717e-184	1.09983	0.51	0.218	3.54543e-180	NK cells
Prkacb	2.48989e-184	1.37604	0.551	0.291	4.65311e-180	NK cells
Itgax	2.96829e-183	1.0313	0.57	0.274	5.54713e-179	NK cells
Atp2a3	3.67318e-182	1.33141	0.498	0.237	6.86444e-178	NK cells
Adora2a	2.50898e-181	1.76431	0.292	0.089	4.68878e-177	NK cells
Gm47662	8.82112e-179	1.65186	0.128	0.015	1.64849e-174	NK cells
Arl6ip5	1.86696e-178	1.14098	0.684	0.462	3.48897e-174	NK cells
Kcnj8	4.80995e-178	2.11588	0.113	0.011	8.98883e-174	NK cells
Gas7	1.5124e-176	1.63893	0.337	0.12	2.82637e-172	NK cells
F2r	2.2719e-176	1.52874	0.213	0.048	4.24573e-172	NK cells
Prag1	3.03553e-175	1.72022	0.166	0.029	5.6728e-171	NK cells
Stk32c	7.04335e-173	1.61849	0.126	0.015	1.31626e-168	NK cells
Gm4070	2.04809e-172	1.34463	0.532	0.284	3.82746e-168	NK cells
Srgap3	1.78502e-171	1.66748	0.236	0.062	3.33585e-167	NK cells
Emid1	3.4948e-171	1.59782	0.148	0.022	6.53107e-167	NK cells
Bcl2l11	8.04585e-170	1.19872	0.624	0.373	1.50361e-165	NK cells
Cysltr2	3.70648e-168	1.5959	0.172	0.032	6.92667e-164	NK cells
S1pr4	1.81213e-167	1.43612	0.39	0.158	3.38651e-163	NK cells
Dnajc1	2.21395e-166	1.35511	0.506	0.266	4.13742e-162	NK cells
Zcchc18	2.11566e-165	1.56265	0.188	0.039	3.95374e-161	NK cells
Ppp3cc	3.33896e-164	1.49319	0.272	0.081	6.23986e-160	NK cells
Cetn2	9.01257e-164	1.23223	0.555	0.315	1.68427e-159	NK cells
Arhgef18	1.37938e-159	1.18067	0.546	0.292	2.57778e-155	NK cells
Tshz3	4.48921e-159	1.58607	0.1	0.009	8.38943e-155	NK cells
Sptbn1	5.85888e-156	1.02699	0.67	0.434	1.09491e-151	NK cells
Kif13b	2.50299e-154	1.51394	0.339	0.133	4.6776e-150	NK cells
Elovl7	5.28e-153	1.57134	0.112	0.013	9.86727e-149	NK cells
AI506816	1.73453e-152	1.47087	0.38	0.164	3.24149e-148	NK cells
Plaat3	1.28325e-151	1.21893	0.476	0.244	2.39815e-147	NK cells
Prex1	2.63793e-149	1.08666	0.667	0.454	4.92976e-145	NK cells
C1qtnf6	9.76764e-146	1.69117	0.122	0.018	1.82538e-141	NK cells
Rad54l2	8.07588e-145	1.60162	0.267	0.089	1.50922e-140	NK cells
Gimap1os	1.1818e-141	1.3334	0.249	0.075	2.20855e-137	NK cells
Myo6	7.06683e-139	1.52455	0.16	0.034	1.32065e-134	NK cells
Lamb3	2.6065e-136	1.21377	0.278	0.093	4.87102e-132	NK cells
Sike1	5.1847e-136	1.27117	0.477	0.262	9.68917e-132	NK cells
Mmgt2	9.95416e-135	1.59051	0.288	0.109	1.86023e-130	NK cells
Gpr174	2.48711e-133	1.20775	0.322	0.122	4.64792e-129	NK cells
Gm28875	3.46966e-133	1.5712	0.301	0.117	6.48409e-129	NK cells
St3gal6	7.29765e-133	1.04275	0.352	0.14	1.36378e-128	NK cells
Aoah	1.00681e-132	1.566	0.203	0.058	1.88153e-128	NK cells
Ubald2	8.96054e-132	1.02991	0.635	0.437	1.67454e-127	NK cells
Cobll1	9.16303e-132	1.40126	0.181	0.045	1.71239e-127	NK cells
Cisd3	9.2098e-132	1.47273	0.27	0.098	1.72113e-127	NK cells
Btg3	1.44654e-131	1.46276	0.332	0.139	2.70329e-127	NK cells
Nlrc3	2.04249e-131	1.446	0.252	0.084	3.81701e-127	NK cells
Setbp1	3.32242e-131	1.48096	0.176	0.043	6.20894e-127	NK cells
Tnk2	2.56339e-129	1.4988	0.198	0.054	4.79046e-125	NK cells
Lzts1	3.61469e-129	1.51482	0.128	0.023	6.75512e-125	NK cells
Crim1	4.74267e-128	1.49512	0.212	0.062	8.8631e-124	NK cells
Nme7	5.36123e-128	1.59384	0.203	0.059	1.00191e-123	NK cells
Zap70	3.22649e-127	1.21022	0.315	0.122	6.02967e-123	NK cells
Dcxr	7.49783e-127	1.62244	0.234	0.079	1.4012e-122	NK cells
AC149090.1	1.49375e-125	1.073	0.71	0.524	2.79152e-121	NK cells
Abcg2	8.30963e-125	1.50395	0.119	0.02	1.5529e-120	NK cells
Rab19	1.04019e-124	1.41384	0.274	0.103	1.9439e-120	NK cells
4930486L24Rik	3.65257e-124	1.41737	0.107	0.016	6.82593e-120	NK cells
Ak3	2.57207e-123	1.47639	0.303	0.127	4.80669e-119	NK cells
Nrgn	4.34174e-122	1.5683	0.116	0.019	8.11385e-118	NK cells
Nup210	1.17254e-119	1.14781	0.478	0.272	2.19124e-115	NK cells
Smad3	1.9146e-116	1.42328	0.257	0.096	3.578e-112	NK cells
Ttc39b	2.69574e-116	1.11594	0.404	0.196	5.0378e-112	NK cells
Nsmaf	2.84965e-116	1.28539	0.403	0.209	5.32543e-112	NK cells
Cmc1	5.98178e-116	1.26347	0.43	0.242	1.11788e-111	NK cells
Rnf157	2.12501e-115	1.4979	0.192	0.057	3.97122e-111	NK cells
Ptpn7	3.4728e-115	1.11712	0.405	0.203	6.48996e-111	NK cells
Nt5c	6.03634e-114	1.01075	0.581	0.405	1.12807e-109	NK cells
Fryl	8.96369e-113	1.11299	0.522	0.328	1.67513e-108	NK cells
Gm17745	2.58264e-111	1.34055	0.143	0.033	4.82644e-107	NK cells
Gm20069	1.85582e-110	1.27576	0.124	0.025	3.46816e-106	NK cells
Ift20	5.26759e-110	1.04026	0.552	0.377	9.84407e-106	NK cells
Lrrk1	6.17617e-110	1.23042	0.409	0.222	1.1542e-105	NK cells
Gnptg	1.57505e-109	1.42236	0.303	0.134	2.94346e-105	NK cells
Syne3	3.43504e-109	1.36101	0.237	0.086	6.4194e-105	NK cells
Eef2k	1.8674e-108	1.23077	0.182	0.053	3.4898e-104	NK cells
Acss2	4.68098e-106	1.29708	0.244	0.091	8.74781e-102	NK cells
Gatad2a	1.34544e-104	1.03483	0.513	0.33	2.51436e-100	NK cells
Rhof	2.84343e-103	1.12593	0.342	0.16	5.3138e-99	NK cells
Elk3	8.17982e-103	1.06857	0.479	0.291	1.52864e-98	NK cells
Fzd5	1.801e-102	1.40023	0.147	0.038	3.36571e-98	NK cells
Mrpl58	2.89287e-99	1.14429	0.427	0.253	5.4062e-95	NK cells
Arhgap10	4.52656e-99	1.31548	0.172	0.052	8.45923e-95	NK cells
Rbl2	1.97271e-96	1.01468	0.455	0.268	3.68661e-92	NK cells
Ddit4	3.55506e-96	1.21144	0.273	0.116	6.6437e-92	NK cells
Abcb1a	3.74286e-96	1.42778	0.193	0.065	6.99465e-92	NK cells
Rom1	4.25004e-96	1.28465	0.14	0.037	7.94247e-92	NK cells
Acot7	1.54758e-93	1.26468	0.349	0.185	2.89212e-89	NK cells
Slc25a24	5.66237e-93	1.24456	0.306	0.148	1.05818e-88	NK cells
Ern1	1.63126e-92	1.36498	0.251	0.106	3.04849e-88	NK cells
Ndfip2	1.74769e-92	1.1618	0.373	0.202	3.26609e-88	NK cells
Serpina3g	2.70562e-92	1.25116	0.241	0.096	5.05626e-88	NK cells
Tmsb15b1	8.81543e-92	1.31844	0.217	0.082	1.64743e-87	NK cells
Fam53b	2.21217e-91	1.18682	0.364	0.197	4.1341e-87	NK cells
Chpf	2.9709e-91	1.28982	0.153	0.045	5.55201e-87	NK cells
Apol7e	6.22961e-90	1.2408	0.17	0.053	1.16419e-85	NK cells
Gm15472	6.89804e-90	1.14698	0.245	0.099	1.28911e-85	NK cells
Irf2bpl	8.57471e-90	1.06885	0.413	0.239	1.60244e-85	NK cells
Gm45716	4.40095e-87	1.19084	0.161	0.051	8.2245e-83	NK cells
Gramd4	9.36553e-87	1.23462	0.351	0.189	1.75023e-82	NK cells
Lta4h	5.24455e-86	1.04455	0.472	0.309	9.80102e-82	NK cells
Cdca7l	7.71359e-86	1.39144	0.2	0.076	1.44152e-81	NK cells
Usp48	3.99445e-85	1.1107	0.416	0.253	7.46484e-81	NK cells
Gnptab	3.00384e-84	1.29584	0.34	0.188	5.61358e-80	NK cells
Plekha5	1.15841e-83	1.44205	0.184	0.067	2.16484e-79	NK cells
Cxxc5	1.01205e-82	1.11694	0.175	0.059	1.89131e-78	NK cells
Stard10	2.72156e-82	1.28355	0.136	0.039	5.08605e-78	NK cells
Mosmo	8.31816e-82	1.25456	0.25	0.111	1.5545e-77	NK cells
Camk2g	3.77697e-81	1.30096	0.26	0.121	7.0584e-77	NK cells
Crot	9.14098e-81	1.1462	0.331	0.176	1.70827e-76	NK cells
Vcpkmt	1.68084e-80	1.27226	0.149	0.047	3.14116e-76	NK cells
Cmklr1	1.07728e-79	1.38011	0.146	0.046	2.01322e-75	NK cells
Nmb	5.26706e-78	1.10658	0.123	0.034	9.84309e-74	NK cells
Vopp1	1.93454e-77	1.32951	0.251	0.118	3.61527e-73	NK cells
Jakmip1	6.18362e-77	1.01124	0.258	0.115	1.1556e-72	NK cells
Galnt2	2.04054e-76	1.22283	0.309	0.167	3.81336e-72	NK cells
Pkp3	8.33596e-75	1.12168	0.282	0.14	1.55782e-70	NK cells
Fam189b	8.87656e-75	1.06	0.269	0.127	1.65885e-70	NK cells
Arhgap18	3.32822e-74	1.04366	0.313	0.166	6.21978e-70	NK cells
Gpr160	4.24093e-73	1.36812	0.159	0.057	7.92545e-69	NK cells
A630072M18Rik	1.13062e-72	1.17726	0.177	0.066	2.1129e-68	NK cells
Gm15232	3.20368e-72	1.1434	0.102	0.026	5.98703e-68	NK cells
Adamts10	5.25988e-72	1.17798	0.254	0.122	9.82967e-68	NK cells
Ide	7.08592e-72	1.19885	0.302	0.164	1.32422e-67	NK cells
Hs3st3b1	9.24796e-72	1.34209	0.179	0.068	1.72826e-67	NK cells
Fkbp5	1.98842e-71	1.10768	0.299	0.157	3.71596e-67	NK cells
Cipc	4.8949e-70	1.22039	0.197	0.082	9.14759e-66	NK cells
Cep250	8.62158e-70	1.06044	0.321	0.179	1.6112e-65	NK cells
Fcho1	1.30177e-67	1.16191	0.231	0.108	2.43275e-63	NK cells
Rap2b	2.69849e-67	1.03219	0.387	0.246	5.04293e-63	NK cells
Gm11713	5.29133e-67	1.09775	0.109	0.03	9.88843e-63	NK cells
Stk39	5.47047e-67	1.08834	0.155	0.056	1.02232e-62	NK cells
Zbtb38	7.28393e-67	1.09903	0.282	0.147	1.36122e-62	NK cells
Gab3	5.5623e-66	1.21852	0.221	0.102	1.03948e-61	NK cells
Rcn1	1.27171e-65	1.12075	0.118	0.036	2.37657e-61	NK cells
B3gat3	4.0324e-64	1.08399	0.325	0.191	7.53575e-60	NK cells
A930024E05Rik	4.76648e-63	1.08783	0.182	0.074	8.90759e-59	NK cells
Gm36723	1.46837e-62	1.34613	0.117	0.036	2.7441e-58	NK cells
Klhdc2	1.57952e-62	1.08493	0.284	0.155	2.95181e-58	NK cells
Dhrs3	2.84823e-62	1.12449	0.208	0.094	5.32277e-58	NK cells
Zfp512	2.24513e-61	1.17437	0.183	0.078	4.19571e-57	NK cells
Gm36738	5.64166e-61	1.04147	0.263	0.137	1.05431e-56	NK cells
Paxx	2.10298e-59	1.07806	0.23	0.114	3.93004e-55	NK cells
Mrpl9	3.9085e-59	1.02696	0.313	0.185	7.3042e-55	NK cells
Hes6	5.83403e-59	1.04375	0.293	0.168	1.09026e-54	NK cells
Cdk2ap1	1.4504e-58	1.07643	0.274	0.153	2.71051e-54	NK cells
Atp8b2	1.8283e-56	1.23442	0.172	0.075	3.41673e-52	NK cells
Pim2	8.00116e-55	1.11807	0.163	0.067	1.49526e-50	NK cells
Cracr2a	6.08901e-54	1.03962	0.119	0.041	1.13791e-49	NK cells
Tyk2	2.28574e-53	1.03584	0.289	0.173	4.27158e-49	NK cells
B4galt7	5.52474e-53	1.06254	0.148	0.06	1.03246e-48	NK cells
5830432E09Rik	7.74977e-53	1.10797	0.124	0.045	1.44828e-48	NK cells
Impdh1	9.13152e-53	1.01444	0.187	0.086	1.7065e-48	NK cells
Abca2	1.88284e-52	1.03019	0.226	0.116	3.51866e-48	NK cells
Ier5l	7.97294e-51	1.22279	0.133	0.052	1.48998e-46	NK cells
Agtrap	2.37027e-49	1.00329	0.259	0.147	4.42956e-45	NK cells
Cemip2	2.36607e-48	1.12211	0.167	0.076	4.42172e-44	NK cells
Fam117a	2.38938e-48	1.00468	0.238	0.13	4.46527e-44	NK cells
Zfhx2	2.37879e-45	1.07157	0.177	0.085	4.44549e-41	NK cells
Alad	1.09935e-37	1.01958	0.114	0.048	2.05447e-33	NK cells
Raph1	7.80992e-37	1.05317	0.219	0.13	1.45952e-32	NK cells
Dipk2a	2.82513e-33	1.00305	0.15	0.077	5.2796e-29	NK cells
Abcb1b	6.53357e-28	1.03014	0.229	0.149	1.22099e-23	NK cells
Hist1h1b	0	6.3571	0.875	0.054	0	Proliferating NK/T cells
Hist1h2ap	0	6.29234	0.975	0.373	0	Proliferating NK/T cells
Hist1h2ae	0	6.01211	0.906	0.145	0	Proliferating NK/T cells
Top2a	0	5.22501	0.927	0.087	0	Proliferating NK/T cells
Pclaf	0	5.08462	0.957	0.047	0	Proliferating NK/T cells
Hist1h3c	0	5.07747	0.765	0.014	0	Proliferating NK/T cells
Hist1h3b	0	5.02834	0.727	0.011	0	Proliferating NK/T cells
Nusap1	0	4.83576	0.763	0.02	0	Proliferating NK/T cells
Hist1h2bb	0	4.57145	0.753	0.021	0	Proliferating NK/T cells
Mki67	0	4.52096	0.937	0.076	0	Proliferating NK/T cells
Birc5	0	4.47636	0.916	0.038	0	Proliferating NK/T cells
Stmn1	0	4.39902	0.992	0.167	0	Proliferating NK/T cells
Rrm2	0	4.35145	0.806	0.024	0	Proliferating NK/T cells
Hist1h4d	0	4.20146	0.908	0.209	0	Proliferating NK/T cells
Hist1h1d	0	4.19044	0.827	0.061	0	Proliferating NK/T cells
Hist1h2ab	0	4.16176	0.684	0.014	0	Proliferating NK/T cells
Prc1	0	4.07323	0.741	0.032	0	Proliferating NK/T cells
Hist1h3f	0	4.02504	0.753	0.056	0	Proliferating NK/T cells
Ube2c	0	4.01583	0.698	0.049	0	Proliferating NK/T cells
Cenpf	0	4.0152	0.669	0.026	0	Proliferating NK/T cells
Cdk1	0	4.00178	0.773	0.022	0	Proliferating NK/T cells
Ccna2	0	3.99354	0.773	0.018	0	Proliferating NK/T cells
Hist1h2br	0	3.86487	0.729	0.045	0	Proliferating NK/T cells
Cdca8	0	3.86468	0.871	0.044	0	Proliferating NK/T cells
Hist1h2bm	0	3.85534	0.661	0.012	0	Proliferating NK/T cells
Kif11	0	3.80557	0.757	0.021	0	Proliferating NK/T cells
Spc24	0	3.76588	0.857	0.042	0	Proliferating NK/T cells
Tpx2	0	3.72899	0.725	0.026	0	Proliferating NK/T cells
Fbxo5	0	3.72702	0.729	0.022	0	Proliferating NK/T cells
Hist1h3e	0	3.69785	0.741	0.05	0	Proliferating NK/T cells
Hist1h4h	0	3.69645	0.833	0.143	0	Proliferating NK/T cells
Clspn	0	3.6196	0.775	0.027	0	Proliferating NK/T cells
Ccnb2	0	3.58307	0.822	0.039	0	Proliferating NK/T cells
Sgo1	0	3.57692	0.735	0.016	0	Proliferating NK/T cells
Dut	0	3.52916	0.943	0.141	0	Proliferating NK/T cells
Hist2h2ac	0	3.52808	0.727	0.069	0	Proliferating NK/T cells
Cks1b	0	3.52205	0.914	0.086	0	Proliferating NK/T cells
Hist1h2bj	0	3.50266	0.635	0.018	0	Proliferating NK/T cells
Lig1	0	3.50147	0.876	0.109	0	Proliferating NK/T cells
Tyms	0	3.45282	0.776	0.043	0	Proliferating NK/T cells
Smc2	0	3.44902	0.902	0.11	0	Proliferating NK/T cells
Hmmr	0	3.44452	0.6	0.016	0	Proliferating NK/T cells
Esco2	0	3.43603	0.618	0.008	0	Proliferating NK/T cells
Spc25	0	3.41655	0.706	0.022	0	Proliferating NK/T cells
Hist1h1a	0	3.40345	0.612	0.021	0	Proliferating NK/T cells
H2afx	0	3.39584	0.81	0.129	0	Proliferating NK/T cells
Cdca3	0	3.38925	0.727	0.033	0	Proliferating NK/T cells
Knl1	0	3.38315	0.7	0.028	0	Proliferating NK/T cells
Asf1b	0	3.36623	0.747	0.029	0	Proliferating NK/T cells
Cenpe	0	3.33483	0.694	0.029	0	Proliferating NK/T cells
Aurkb	0	3.30005	0.678	0.031	0	Proliferating NK/T cells
Cit	0	3.28678	0.71	0.02	0	Proliferating NK/T cells
Uhrf1	0	3.264	0.69	0.033	0	Proliferating NK/T cells
Kif15	0	3.23601	0.706	0.024	0	Proliferating NK/T cells
Cenpw	0	3.23492	0.902	0.092	0	Proliferating NK/T cells
Lockd	0	3.13852	0.831	0.055	0	Proliferating NK/T cells
Mxd3	0	3.11319	0.567	0.006	0	Proliferating NK/T cells
Rad51ap1	0	3.09261	0.637	0.015	0	Proliferating NK/T cells
Mcm7	0	3.08596	0.933	0.165	0	Proliferating NK/T cells
Hist2h2bb	0	3.08256	0.571	0.018	0	Proliferating NK/T cells
Ncapg	0	3.0484	0.62	0.014	0	Proliferating NK/T cells
Hells	0	3.0375	0.749	0.073	0	Proliferating NK/T cells
Kif4	0	3.03172	0.573	0.012	0	Proliferating NK/T cells
1500009L16Rik	0	3.0237	0.475	0.011	0	Proliferating NK/T cells
Ncaph	0	2.98256	0.62	0.018	0	Proliferating NK/T cells
Aspm	0	2.95931	0.539	0.017	0	Proliferating NK/T cells
Gmnn	0	2.95754	0.831	0.107	0	Proliferating NK/T cells
Ccne2	0	2.95256	0.527	0.02	0	Proliferating NK/T cells
Tcf19	0	2.95203	0.618	0.03	0	Proliferating NK/T cells
Dlgap5	0	2.95164	0.604	0.025	0	Proliferating NK/T cells
Diaph3	0	2.93966	0.69	0.034	0	Proliferating NK/T cells
Incenp	0	2.92176	0.745	0.093	0	Proliferating NK/T cells
Ncapg2	0	2.91488	0.69	0.043	0	Proliferating NK/T cells
Depdc1a	0	2.90168	0.555	0.01	0	Proliferating NK/T cells
Ccdc34	0	2.89383	0.78	0.082	0	Proliferating NK/T cells
Plk1	0	2.89381	0.496	0.011	0	Proliferating NK/T cells
Ncapd2	0	2.89272	0.741	0.045	0	Proliferating NK/T cells
Tacc3	0	2.8899	0.716	0.049	0	Proliferating NK/T cells
Rrm1	0	2.88312	0.827	0.092	0	Proliferating NK/T cells
Rad51	0	2.87359	0.567	0.013	0	Proliferating NK/T cells
Mcm5	0	2.86365	0.802	0.081	0	Proliferating NK/T cells
Ezh2	0	2.82014	0.886	0.153	0	Proliferating NK/T cells
Hist1h4a	0	2.80785	0.573	0.026	0	Proliferating NK/T cells
Ccnb1	0	2.80661	0.52	0.018	0	Proliferating NK/T cells
Sgo2a	0	2.80371	0.524	0.012	0	Proliferating NK/T cells
Prim1	0	2.79702	0.68	0.038	0	Proliferating NK/T cells
Pbk	0	2.77687	0.504	0.008	0	Proliferating NK/T cells
Nuf2	0	2.77194	0.535	0.011	0	Proliferating NK/T cells
Cdkn3	0	2.75506	0.555	0.026	0	Proliferating NK/T cells
Ska1	0	2.74915	0.525	0.009	0	Proliferating NK/T cells
Ckap2l	0	2.74373	0.624	0.033	0	Proliferating NK/T cells
Mad2l1	0	2.73253	0.704	0.042	0	Proliferating NK/T cells
Mcm3	0	2.7288	0.804	0.107	0	Proliferating NK/T cells
Kif22	0	2.71789	0.551	0.019	0	Proliferating NK/T cells
Cenph	0	2.71611	0.541	0.014	0	Proliferating NK/T cells
Ckap2	0	2.70934	0.557	0.02	0	Proliferating NK/T cells
Neil3	0	2.70812	0.502	0.01	0	Proliferating NK/T cells
Pola1	0	2.70463	0.712	0.066	0	Proliferating NK/T cells
Hist1h2ad	0	2.70407	0.49	0.011	0	Proliferating NK/T cells
Ccnf	0	2.70151	0.527	0.015	0	Proliferating NK/T cells
Mis18bp1	0	2.69119	0.496	0.022	0	Proliferating NK/T cells
Shcbp1	0	2.68507	0.516	0.011	0	Proliferating NK/T cells
Bub1b	0	2.6622	0.551	0.033	0	Proliferating NK/T cells
Ndc80	0	2.65561	0.688	0.044	0	Proliferating NK/T cells
Cenpk	0	2.6487	0.608	0.021	0	Proliferating NK/T cells
Cdc20	0	2.64544	0.486	0.02	0	Proliferating NK/T cells
Racgap1	0	2.64327	0.841	0.132	0	Proliferating NK/T cells
Brca1	0	2.60198	0.49	0.014	0	Proliferating NK/T cells
Hmgn2	0	2.59315	0.976	0.304	0	Proliferating NK/T cells
Tk1	0	2.59016	0.586	0.03	0	Proliferating NK/T cells
Hist1h2bh	0	2.5743	0.473	0.011	0	Proliferating NK/T cells
Kif2c	0	2.57079	0.463	0.007	0	Proliferating NK/T cells
Hist1h3i	0	2.55642	0.461	0.008	0	Proliferating NK/T cells
Bub1	0	2.55418	0.506	0.01	0	Proliferating NK/T cells
Cenpm	0	2.54836	0.563	0.024	0	Proliferating NK/T cells
Cep55	0	2.54297	0.492	0.015	0	Proliferating NK/T cells
Rfc4	0	2.53251	0.684	0.054	0	Proliferating NK/T cells
Hist1h2an	0	2.53229	0.433	0.005	0	Proliferating NK/T cells
Hist1h4c	0	2.52581	0.608	0.058	0	Proliferating NK/T cells
Ccne1	0	2.51459	0.5	0.023	0	Proliferating NK/T cells
Ttk	0	2.50788	0.463	0.007	0	Proliferating NK/T cells
Hist2h3b	0	2.50754	0.437	0.014	0	Proliferating NK/T cells
Mcm6	0	2.50621	0.827	0.16	0	Proliferating NK/T cells
Tipin	0	2.50552	0.692	0.074	0	Proliferating NK/T cells
Hist1h2bn	0	2.50268	0.394	0.005	0	Proliferating NK/T cells
E2f8	0	2.5016	0.498	0.022	0	Proliferating NK/T cells
Cmc2	0	2.50032	0.816	0.119	0	Proliferating NK/T cells
Kif20b	0	2.49557	0.553	0.04	0	Proliferating NK/T cells
Brip1	0	2.46093	0.504	0.019	0	Proliferating NK/T cells
Dtl	0	2.46068	0.571	0.034	0	Proliferating NK/T cells
Dnmt1	0	2.43147	0.896	0.218	0	Proliferating NK/T cells
Hmgb3	0	2.42661	0.571	0.031	0	Proliferating NK/T cells
Chaf1a	0	2.4203	0.512	0.028	0	Proliferating NK/T cells
Stil	0	2.41272	0.453	0.009	0	Proliferating NK/T cells
Dhfr	0	2.40434	0.563	0.026	0	Proliferating NK/T cells
Foxm1	0	2.39397	0.443	0.01	0	Proliferating NK/T cells
Spag5	0	2.37875	0.447	0.009	0	Proliferating NK/T cells
Cdc6	0	2.36908	0.433	0.015	0	Proliferating NK/T cells
Gzmk	0	2.35771	0.435	0.022	0	Proliferating NK/T cells
Cbx5	0	2.3562	0.82	0.132	0	Proliferating NK/T cells
Kif20a	0	2.35543	0.443	0.014	0	Proliferating NK/T cells
Hist1h3a	0	2.35171	0.567	0.037	0	Proliferating NK/T cells
Bard1	0	2.35114	0.527	0.024	0	Proliferating NK/T cells
Hist1h2af	0	2.33784	0.4	0.003	0	Proliferating NK/T cells
Cip2a	0	2.32544	0.441	0.016	0	Proliferating NK/T cells
Cdca2	0	2.29996	0.418	0.011	0	Proliferating NK/T cells
Rfc3	0	2.29312	0.655	0.075	0	Proliferating NK/T cells
Ncapd3	0	2.29168	0.767	0.114	0	Proliferating NK/T cells
Orc6	0	2.28421	0.706	0.097	0	Proliferating NK/T cells
Ect2	0	2.27788	0.427	0.017	0	Proliferating NK/T cells
Hist1h2ak	0	2.2767	0.394	0.006	0	Proliferating NK/T cells
Cenps	0	2.27396	0.508	0.025	0	Proliferating NK/T cells
Cenpp	0	2.27177	0.439	0.015	0	Proliferating NK/T cells
Dnajc9	0	2.2603	0.92	0.2	0	Proliferating NK/T cells
Mns1	0	2.25288	0.555	0.034	0	Proliferating NK/T cells
Cdc45	0	2.24917	0.471	0.017	0	Proliferating NK/T cells
Trip13	0	2.22518	0.439	0.017	0	Proliferating NK/T cells
Wdr76	0	2.22385	0.7	0.078	0	Proliferating NK/T cells
Phgdh	0	2.22306	0.761	0.115	0	Proliferating NK/T cells
Atad5	0	2.22291	0.504	0.03	0	Proliferating NK/T cells
E2f7	0	2.21116	0.363	0.005	0	Proliferating NK/T cells
Mcm4	0	2.20916	0.753	0.128	0	Proliferating NK/T cells
Hist1h2be	0	2.20798	0.533	0.052	0	Proliferating NK/T cells
Knstrn	0	2.20453	0.512	0.045	0	Proliferating NK/T cells
Cdc7	0	2.19379	0.51	0.028	0	Proliferating NK/T cells
Anln	0	2.19099	0.416	0.017	0	Proliferating NK/T cells
Kif14	0	2.18729	0.371	0.007	0	Proliferating NK/T cells
Fignl1	0	2.1866	0.425	0.014	0	Proliferating NK/T cells
Ska3	0	2.15629	0.386	0.008	0	Proliferating NK/T cells
Plk4	0	2.14244	0.6	0.052	0	Proliferating NK/T cells
Hist1h2ai	0	2.13917	0.367	0.006	0	Proliferating NK/T cells
Rfc5	0	2.13571	0.616	0.056	0	Proliferating NK/T cells
Mybl2	0	2.13451	0.378	0.01	0	Proliferating NK/T cells
Mcm10	0	2.13295	0.457	0.015	0	Proliferating NK/T cells
Pole	0	2.13175	0.42	0.016	0	Proliferating NK/T cells
Fen1	0	2.11075	0.635	0.07	0	Proliferating NK/T cells
Cdkn2c	0	2.08234	0.486	0.04	0	Proliferating NK/T cells
Ube2t	0	2.07986	0.565	0.041	0	Proliferating NK/T cells
Cdca5	0	2.05349	0.384	0.008	0	Proliferating NK/T cells
Kntc1	0	2.02688	0.349	0.006	0	Proliferating NK/T cells
Hist1h3d	0	2.01714	0.359	0.014	0	Proliferating NK/T cells
Rad54l	0	1.99072	0.367	0.014	0	Proliferating NK/T cells
Pimreg	0	1.97232	0.327	0.008	0	Proliferating NK/T cells
Zdhhc2	0	1.94474	0.429	0.027	0	Proliferating NK/T cells
Tedc1	0	1.94087	0.353	0.011	0	Proliferating NK/T cells
1700097N02Rik	0	1.92757	0.41	0.03	0	Proliferating NK/T cells
Kifc1	0	1.91949	0.355	0.009	0	Proliferating NK/T cells
Ppil1	0	1.908	0.588	0.075	0	Proliferating NK/T cells
Nek2	0	1.90456	0.322	0.007	0	Proliferating NK/T cells
Aunip	0	1.90301	0.331	0.005	0	Proliferating NK/T cells
Rcc1	0	1.90144	0.471	0.042	0	Proliferating NK/T cells
Spdl1	0	1.89567	0.371	0.015	0	Proliferating NK/T cells
Mms22l	0	1.88162	0.469	0.042	0	Proliferating NK/T cells
Chaf1b	0	1.87734	0.425	0.028	0	Proliferating NK/T cells
Ska2	0	1.86553	0.373	0.024	0	Proliferating NK/T cells
Haus4	0	1.86542	0.586	0.074	0	Proliferating NK/T cells
Lrr1	0	1.85689	0.294	0.004	0	Proliferating NK/T cells
Aurka	0	1.85551	0.343	0.021	0	Proliferating NK/T cells
Arhgap19	0	1.85362	0.347	0.023	0	Proliferating NK/T cells
Hist1h2bg	0	1.84291	0.331	0.012	0	Proliferating NK/T cells
Nt5c3b	0	1.83733	0.651	0.086	0	Proliferating NK/T cells
Hist1h2bp	0	1.82971	0.286	0.005	0	Proliferating NK/T cells
Melk	0	1.81943	0.322	0.01	0	Proliferating NK/T cells
Chek1	0	1.7884	0.316	0.011	0	Proliferating NK/T cells
Brca2	0	1.783	0.361	0.019	0	Proliferating NK/T cells
Prr11	0	1.76933	0.269	0.008	0	Proliferating NK/T cells
Ticrr	0	1.76192	0.304	0.007	0	Proliferating NK/T cells
Zwilch	0	1.75372	0.322	0.013	0	Proliferating NK/T cells
Kif18a	0	1.74883	0.455	0.041	0	Proliferating NK/T cells
Rad54b	0	1.63902	0.261	0.006	0	Proliferating NK/T cells
Parpbp	0	1.63822	0.241	0.004	0	Proliferating NK/T cells
Ercc6l	0	1.62827	0.318	0.021	0	Proliferating NK/T cells
Sapcd2	0	1.60109	0.231	0.003	0	Proliferating NK/T cells
Eme1	0	1.5706	0.273	0.007	0	Proliferating NK/T cells
Psmc3ip	0	1.56042	0.318	0.021	0	Proliferating NK/T cells
2001-01-01	0	1.5359	0.298	0.018	0	Proliferating NK/T cells
Zgrf1	0	1.52898	0.298	0.018	0	Proliferating NK/T cells
Gtse1	0	1.5193	0.225	0.005	0	Proliferating NK/T cells
Hist1h4j	0	1.49809	0.231	0.006	0	Proliferating NK/T cells
Cenpi	0	1.47725	0.239	0.007	0	Proliferating NK/T cells
Depdc1b	0	1.44125	0.21	0.004	0	Proliferating NK/T cells
Hist1h4k	0	1.43327	0.2	0.002	0	Proliferating NK/T cells
Traip	0	1.42586	0.253	0.007	0	Proliferating NK/T cells
Poc1a	0	1.42499	0.296	0.018	0	Proliferating NK/T cells
Chtf18	0	1.42417	0.231	0.008	0	Proliferating NK/T cells
Cenpn	0	1.40356	0.243	0.01	0	Proliferating NK/T cells
Cdc25c	0	1.38686	0.225	0.005	0	Proliferating NK/T cells
Kif18b	0	1.38418	0.2	0.003	0	Proliferating NK/T cells
Ankle1	0	1.33531	0.19	0.003	0	Proliferating NK/T cells
Exo1	0	1.32682	0.212	0.007	0	Proliferating NK/T cells
Pif1	0	1.31885	0.178	0.002	0	Proliferating NK/T cells
Fanci	0	1.28943	0.202	0.005	0	Proliferating NK/T cells
Hist1h2ag	0	1.21366	0.182	0.003	0	Proliferating NK/T cells
Hist1h2bf	0	1.1604	0.178	0.005	0	Proliferating NK/T cells
Polq	0	1.13034	0.186	0.005	0	Proliferating NK/T cells
Hist1h3g	0	1.10828	0.163	0.002	0	Proliferating NK/T cells
BC030867	0	1.01528	0.141	0.002	0	Proliferating NK/T cells
Hmgb2	3.01118e-307	3.21778	1	0.798	5.62729e-303	Proliferating NK/T cells
Mcm2	4.72618e-303	2.00197	0.547	0.07	8.83228e-299	Proliferating NK/T cells
Gins2	3.43639e-300	1.65601	0.386	0.034	6.42193e-296	Proliferating NK/T cells
Hist1h2ac	4.32522e-300	1.60261	0.325	0.023	8.08297e-296	Proliferating NK/T cells
Hist1h1e	1.11719e-298	3.48961	0.91	0.296	2.0878e-294	Proliferating NK/T cells
Hist1h4n	3.0649e-297	1.58139	0.273	0.016	5.72769e-293	Proliferating NK/T cells
Cenpa	6.28644e-297	2.37528	0.827	0.178	1.17481e-292	Proliferating NK/T cells
Hist1h4i	1.00019e-293	1.59112	0.678	0.106	1.86916e-289	Proliferating NK/T cells
Cdc25b	1.12792e-291	1.87018	0.618	0.09	2.10785e-287	Proliferating NK/T cells
Oip5	2.77973e-290	1.03805	0.147	0.003	5.19476e-286	Proliferating NK/T cells
Fxn	1.31264e-288	1.62745	0.482	0.055	2.45306e-284	Proliferating NK/T cells
Rnaseh2b	1.14185e-287	1.80448	0.661	0.106	2.13388e-283	Proliferating NK/T cells
Espl1	5.33333e-284	1.52818	0.306	0.022	9.96693e-280	Proliferating NK/T cells
Tubg1	5.67739e-284	1.65064	0.475	0.055	1.06099e-279	Proliferating NK/T cells
Cbx3	1.10133e-282	2.1347	0.996	0.544	2.05817e-278	Proliferating NK/T cells
Sh2d1a	1.13715e-282	1.84775	0.747	0.133	2.12511e-278	Proliferating NK/T cells
Tuba1b	1.75303e-282	2.91473	0.982	0.478	3.27607e-278	Proliferating NK/T cells
Tubb5	2.74607e-282	2.77014	0.986	0.576	5.13186e-278	Proliferating NK/T cells
Tfdp1	6.05378e-281	1.89851	0.622	0.097	1.13133e-276	Proliferating NK/T cells
Dctpp1	1.88888e-280	2.01122	0.765	0.153	3.52993e-276	Proliferating NK/T cells
Mtfr2	5.45687e-280	1.24203	0.188	0.007	1.01978e-275	Proliferating NK/T cells
Blm	4.30692e-279	1.57095	0.42	0.043	8.04876e-275	Proliferating NK/T cells
Wdhd1	5.05882e-279	1.57284	0.404	0.04	9.45393e-275	Proliferating NK/T cells
Cdca7	1.29855e-278	1.89249	0.433	0.047	2.42672e-274	Proliferating NK/T cells
Psat1	8.14423e-277	1.71048	0.52	0.068	1.52199e-272	Proliferating NK/T cells
Ptma	1.15371e-274	1.78757	1	0.906	2.15604e-270	Proliferating NK/T cells
Kif23	2.34823e-273	1.91528	0.678	0.119	4.38836e-269	Proliferating NK/T cells
Ran	2.64148e-273	2.114	0.992	0.554	4.9364e-269	Proliferating NK/T cells
Nsd2	3.41029e-273	1.93089	0.843	0.189	6.37316e-269	Proliferating NK/T cells
Ppia	2.37458e-272	1.58156	1	0.906	4.43762e-268	Proliferating NK/T cells
Dbf4	1.07302e-271	1.84923	0.733	0.14	2.00527e-267	Proliferating NK/T cells
Csrp1	6.48249e-271	1.71763	0.72	0.13	1.21145e-266	Proliferating NK/T cells
4930579G24Rik	4.70594e-270	1.33621	0.235	0.013	8.79446e-266	Proliferating NK/T cells
Hmgb1	9.50988e-270	1.8783	1	0.833	1.77721e-265	Proliferating NK/T cells
Cenpv	4.69556e-269	1.77499	0.41	0.043	8.77506e-265	Proliferating NK/T cells
Prim2	5.63202e-269	1.60728	0.435	0.049	1.05251e-264	Proliferating NK/T cells
Rpa2	6.53712e-269	1.79725	0.663	0.112	1.22166e-264	Proliferating NK/T cells
H2afv	1.58311e-268	2.34106	0.978	0.402	2.95852e-264	Proliferating NK/T cells
Hirip3	3.99646e-267	1.75428	0.533	0.074	7.46859e-263	Proliferating NK/T cells
Haspin	4.67611e-265	1.64646	0.333	0.028	8.73871e-261	Proliferating NK/T cells
Anp32e	3.54085e-264	2.10602	0.949	0.319	6.61715e-260	Proliferating NK/T cells
Dscc1	3.41536e-262	1.2804	0.214	0.011	6.38262e-258	Proliferating NK/T cells
Suv39h1	3.74592e-262	1.54731	0.518	0.069	7.00038e-258	Proliferating NK/T cells
Wee1	5.44523e-262	1.53117	0.351	0.032	1.01761e-257	Proliferating NK/T cells
Selenoh	9.25687e-262	2.03461	0.906	0.259	1.72992e-257	Proliferating NK/T cells
Serp2	1.31705e-261	1.45222	0.331	0.028	2.46131e-257	Proliferating NK/T cells
Dek	1.27581e-256	2.06465	0.994	0.587	2.38423e-252	Proliferating NK/T cells
Pask	5.55099e-255	1.00402	0.141	0.004	1.03737e-250	Proliferating NK/T cells
H2afz	1.89473e-254	2.08588	0.998	0.778	3.54087e-250	Proliferating NK/T cells
E2f3	3.97052e-250	1.6937	0.494	0.067	7.4201e-246	Proliferating NK/T cells
Arhgap11a	7.10796e-250	1.90676	0.6	0.101	1.32834e-245	Proliferating NK/T cells
Alyref	2.15593e-249	1.98952	0.91	0.282	4.029e-245	Proliferating NK/T cells
Topbp1	4.80177e-249	1.8042	0.792	0.176	8.97355e-245	Proliferating NK/T cells
Bex3	8.22444e-249	1.82302	0.72	0.144	1.53698e-244	Proliferating NK/T cells
2610318N02Rik	1.10912e-247	1.2486	0.206	0.01	2.07272e-243	Proliferating NK/T cells
Cchcr1	2.67388e-247	1.34528	0.231	0.014	4.99695e-243	Proliferating NK/T cells
Pmf1	3.57752e-247	1.57102	0.718	0.138	6.68566e-243	Proliferating NK/T cells
Gimap7	8.3094e-247	1.68422	0.835	0.188	1.55286e-242	Proliferating NK/T cells
Snrpd1	4.57692e-246	1.96691	0.961	0.399	8.55335e-242	Proliferating NK/T cells
Anp32b	5.26496e-246	1.87917	0.996	0.64	9.83915e-242	Proliferating NK/T cells
Slc43a3	9.28797e-246	1.42245	0.28	0.021	1.73574e-241	Proliferating NK/T cells
Dsn1	1.17784e-243	1.28847	0.235	0.015	2.20114e-239	Proliferating NK/T cells
Lgals1	8.3155e-243	2.2778	1	0.571	1.554e-238	Proliferating NK/T cells
Dtymk	2.78156e-241	1.82816	0.692	0.139	5.19818e-237	Proliferating NK/T cells
Lsm2	2.97047e-240	1.7584	0.751	0.161	5.55121e-236	Proliferating NK/T cells
Gzmb	5.15652e-239	1.60809	0.686	0.13	9.6365e-235	Proliferating NK/T cells
Tube1	1.25868e-238	1.23329	0.18	0.008	2.35221e-234	Proliferating NK/T cells
Ulbp1	1.60431e-237	1.58076	0.331	0.032	2.99814e-233	Proliferating NK/T cells
Fam81a	1.72321e-237	1.25078	0.131	0.003	3.22034e-233	Proliferating NK/T cells
Polh	2.62612e-236	1.37176	0.294	0.025	4.90769e-232	Proliferating NK/T cells
Ube2s	1.2962e-235	2.14173	0.975	0.453	2.42233e-231	Proliferating NK/T cells
Atad2	4.46233e-235	1.97999	0.853	0.232	8.3392e-231	Proliferating NK/T cells
Rad18	4.55524e-235	1.33732	0.4	0.046	8.51284e-231	Proliferating NK/T cells
Rpa3	7.39052e-235	1.58428	0.543	0.085	1.38114e-230	Proliferating NK/T cells
Pkmyt1	9.57741e-235	1.34179	0.322	0.03	1.78983e-230	Proliferating NK/T cells
Fam92a	1.07833e-233	1.48181	0.406	0.048	2.01518e-229	Proliferating NK/T cells
Pole2	2.70204e-233	1.44141	0.375	0.041	5.04957e-229	Proliferating NK/T cells
Fancd2	2.84536e-233	1.09855	0.165	0.006	5.31741e-229	Proliferating NK/T cells
Bspry	1.85828e-232	1.28227	0.243	0.016	3.47275e-228	Proliferating NK/T cells
Foxd2os	4.58616e-232	1.45637	0.302	0.026	8.57061e-228	Proliferating NK/T cells
Cd160	3.02296e-230	1.79366	0.435	0.056	5.6493e-226	Proliferating NK/T cells
Exosc8	4.41539e-230	1.77915	0.875	0.249	8.25148e-226	Proliferating NK/T cells
Bora	4.68466e-230	1.41264	0.331	0.032	8.7547e-226	Proliferating NK/T cells
Thy1	5.07035e-230	1.60548	0.871	0.216	9.47547e-226	Proliferating NK/T cells
Rmi2	1.80371e-228	1.31523	0.261	0.02	3.37077e-224	Proliferating NK/T cells
Hpf1	1.29257e-227	1.82672	0.869	0.252	2.41556e-223	Proliferating NK/T cells
Ccsap	1.76706e-227	1.28584	0.306	0.028	3.30227e-223	Proliferating NK/T cells
Nucks1	4.41067e-226	1.95084	0.943	0.365	8.24265e-222	Proliferating NK/T cells
Rdm1	2.7228e-225	1.61249	0.506	0.077	5.08837e-221	Proliferating NK/T cells
Kifc5b	3.49645e-225	1.12417	0.173	0.008	6.53417e-221	Proliferating NK/T cells
Cdca7l	6.56312e-223	1.53863	0.514	0.08	1.22652e-218	Proliferating NK/T cells
Tubb4b	8.1721e-223	2.48202	0.922	0.394	1.5272e-218	Proliferating NK/T cells
Cdca4	2.1251e-222	1.54917	0.627	0.116	3.97139e-218	Proliferating NK/T cells
Ckap5	1.9354e-221	1.88413	0.688	0.148	3.61687e-217	Proliferating NK/T cells
Pold2	1.3333e-220	1.44772	0.422	0.055	2.49166e-216	Proliferating NK/T cells
Ccp110	2.12836e-220	1.31905	0.31	0.03	3.97748e-216	Proliferating NK/T cells
Nkg7	1.01865e-219	1.73975	0.939	0.298	1.90366e-215	Proliferating NK/T cells
Nrm	1.59787e-217	1.58172	0.606	0.11	2.9861e-213	Proliferating NK/T cells
Timeless	3.20954e-217	1.44544	0.322	0.033	5.998e-213	Proliferating NK/T cells
Eldr	4.26679e-217	1.20575	0.257	0.02	7.97378e-213	Proliferating NK/T cells
Ccdc18	8.07597e-217	1.20123	0.171	0.008	1.50924e-212	Proliferating NK/T cells
Klrg1	2.0474e-214	1.68379	0.622	0.118	3.82619e-210	Proliferating NK/T cells
2810408I11Rik	4.29707e-213	1.14815	0.196	0.011	8.03036e-209	Proliferating NK/T cells
Gins1	3.29267e-212	1.31124	0.251	0.02	6.15334e-208	Proliferating NK/T cells
Zfp367	4.78848e-210	1.40471	0.306	0.031	8.94871e-206	Proliferating NK/T cells
Banf1	6.38129e-208	1.72966	0.965	0.413	1.19254e-203	Proliferating NK/T cells
Snrpe	3.17982e-207	1.37637	0.996	0.752	5.94244e-203	Proliferating NK/T cells
Fkbp5	1.38351e-206	1.57051	0.714	0.159	2.58551e-202	Proliferating NK/T cells
Rbl1	6.53471e-205	1.4807	0.561	0.1	1.22121e-200	Proliferating NK/T cells
Hint1	1.07289e-204	1.33016	0.992	0.764	2.00502e-200	Proliferating NK/T cells
Mastl	1.72384e-204	1.34941	0.318	0.034	3.22151e-200	Proliferating NK/T cells
Hmgn5	6.02267e-204	1.52468	0.72	0.164	1.12552e-199	Proliferating NK/T cells
Troap	7.04369e-204	1.03502	0.151	0.006	1.31632e-199	Proliferating NK/T cells
Mybl1	1.16675e-203	1.00318	0.133	0.005	2.18043e-199	Proliferating NK/T cells
AI506816	6.08234e-203	1.51928	0.749	0.176	1.13667e-198	Proliferating NK/T cells
Ppih	1.61852e-202	1.41533	0.522	0.089	3.02469e-198	Proliferating NK/T cells
Fam83d	1.03244e-201	1.05708	0.163	0.008	1.92943e-197	Proliferating NK/T cells
Tmpo	2.96757e-201	1.84966	0.945	0.412	5.5458e-197	Proliferating NK/T cells
Tceal9	1.12362e-200	1.52847	0.771	0.191	2.09983e-196	Proliferating NK/T cells
Ddx39	7.40836e-200	1.63482	0.847	0.246	1.38447e-195	Proliferating NK/T cells
Smc4	1.54495e-199	1.833	0.937	0.373	2.8872e-195	Proliferating NK/T cells
Hjurp	1.59003e-199	1.71597	0.747	0.188	2.97144e-195	Proliferating NK/T cells
Paqr4	9.8951e-197	1.32002	0.257	0.023	1.8492e-192	Proliferating NK/T cells
Lmnb1	4.02096e-196	1.12857	0.959	0.327	7.51438e-192	Proliferating NK/T cells
Lsm5	6.10678e-196	1.70534	0.949	0.405	1.14124e-191	Proliferating NK/T cells
Tonsl	8.07878e-196	1.08602	0.222	0.017	1.50976e-191	Proliferating NK/T cells
Zranb3	2.82766e-193	1.06235	0.184	0.011	5.28434e-189	Proliferating NK/T cells
Enkd1	3.21616e-193	1.12812	0.2	0.014	6.01036e-189	Proliferating NK/T cells
Agfg2	3.32955e-192	1.47629	0.516	0.091	6.22227e-188	Proliferating NK/T cells
Ctla4	3.83484e-192	1.89729	0.514	0.094	7.16655e-188	Proliferating NK/T cells
Mrpl18	2.97683e-190	1.641	0.918	0.351	5.5631e-186	Proliferating NK/T cells
S100a10	9.33011e-190	1.69041	0.998	0.652	1.74361e-185	Proliferating NK/T cells
Akip1	7.45257e-189	1.33435	0.371	0.049	1.39274e-184	Proliferating NK/T cells
Nasp	2.10486e-188	1.63029	0.912	0.32	3.93357e-184	Proliferating NK/T cells
Psph	3.07935e-188	1.29111	0.535	0.096	5.7547e-184	Proliferating NK/T cells
Skap1	3.17286e-187	1.34585	0.91	0.255	5.92944e-183	Proliferating NK/T cells
Syce2	2.07628e-186	1.40065	0.325	0.039	3.88016e-182	Proliferating NK/T cells
Ranbp1	4.75438e-186	1.74657	0.924	0.398	8.88499e-182	Proliferating NK/T cells
Snrpg	5.39866e-186	1.13311	0.996	0.853	1.0089e-181	Proliferating NK/T cells
Ifng	6.92335e-185	1.45156	0.465	0.076	1.29384e-180	Proliferating NK/T cells
Usp1	1.24262e-184	1.5705	0.78	0.212	2.32222e-180	Proliferating NK/T cells
Cdk4	1.86732e-183	1.56781	0.784	0.218	3.48965e-179	Proliferating NK/T cells
Rbbp7	2.16358e-183	1.57508	0.873	0.285	4.0433e-179	Proliferating NK/T cells
Serpinb6b	4.39857e-183	1.19964	0.761	0.186	8.22005e-179	Proliferating NK/T cells
Dpy30	9.89392e-183	1.54714	0.763	0.204	1.84898e-178	Proliferating NK/T cells
Cenpl	2.24424e-182	1.27131	0.439	0.069	4.19404e-178	Proliferating NK/T cells
Erh	2.71768e-182	1.58736	0.857	0.276	5.07881e-178	Proliferating NK/T cells
Rbmx2	1.9022e-181	1.19158	0.451	0.073	3.55484e-177	Proliferating NK/T cells
Iqgap3	2.12928e-180	1.01138	0.135	0.006	3.9792e-176	Proliferating NK/T cells
Dnaaf2	2.71871e-180	1.28418	0.375	0.052	5.08073e-176	Proliferating NK/T cells
Slbp	8.3851e-178	1.72307	0.886	0.337	1.56701e-173	Proliferating NK/T cells
Klrc1	3.64235e-177	1.61102	0.463	0.079	6.80683e-173	Proliferating NK/T cells
Anapc15	1.58729e-174	1.33254	0.545	0.108	2.96633e-170	Proliferating NK/T cells
Rpa1	1.74031e-174	1.42414	0.704	0.173	3.25229e-170	Proliferating NK/T cells
E2f1	1.35972e-173	1.60725	0.373	0.055	2.54105e-169	Proliferating NK/T cells
Pola2	3.85074e-173	1.42215	0.461	0.08	7.19627e-169	Proliferating NK/T cells
Dnajc15	8.13627e-173	1.64859	0.957	0.45	1.52051e-168	Proliferating NK/T cells
Pcna	2.37682e-172	1.97326	0.902	0.415	4.4418e-168	Proliferating NK/T cells
Ctla2a	3.54482e-171	1.19711	0.773	0.205	6.62456e-167	Proliferating NK/T cells
B020010K11Rik	5.66238e-171	1.24705	0.22	0.019	1.05819e-166	Proliferating NK/T cells
Arsb	7.21216e-171	1.31918	0.673	0.158	1.34781e-166	Proliferating NK/T cells
Phf19	1.07363e-170	1.08432	0.175	0.012	2.00639e-166	Proliferating NK/T cells
Sumo2	4.86971e-170	1.32212	0.988	0.668	9.10052e-166	Proliferating NK/T cells
Hat1	1.64942e-169	1.53751	0.651	0.159	3.08243e-165	Proliferating NK/T cells
Hist1h2bc	2.74567e-168	1.34058	0.688	0.175	5.13111e-164	Proliferating NK/T cells
Hnrnpab	2.82898e-168	1.49026	0.982	0.597	5.2868e-164	Proliferating NK/T cells
Mthfd1l	3.71172e-168	1.15036	0.369	0.053	6.93645e-164	Proliferating NK/T cells
Ttf2	1.02853e-167	1.34047	0.343	0.048	1.92211e-163	Proliferating NK/T cells
Gpsm2	2.64593e-167	1.30586	0.225	0.021	4.94471e-163	Proliferating NK/T cells
Suv39h2	4.21693e-167	1.04178	0.182	0.013	7.88061e-163	Proliferating NK/T cells
Lin9	3.05349e-166	1.20409	0.347	0.048	5.70635e-162	Proliferating NK/T cells
Trim59	4.55088e-166	1.29717	0.516	0.099	8.50468e-162	Proliferating NK/T cells
Ssrp1	6.07359e-165	1.52312	0.841	0.28	1.13503e-160	Proliferating NK/T cells
Nup62	1.01367e-164	1.2498	0.533	0.107	1.89435e-160	Proliferating NK/T cells
Nup107	1.02659e-164	1.20884	0.451	0.079	1.91849e-160	Proliferating NK/T cells
Rfwd3	2.30703e-164	1.30359	0.529	0.107	4.31137e-160	Proliferating NK/T cells
Hist1h1c	3.70589e-164	1.70763	0.775	0.242	6.92558e-160	Proliferating NK/T cells
Dbi	1.84392e-163	1.41102	0.99	0.571	3.44591e-159	Proliferating NK/T cells
Lsm6	3.94905e-163	1.44309	0.945	0.394	7.37999e-159	Proliferating NK/T cells
Ubl4a	4.65609e-162	1.29371	0.671	0.164	8.7013e-158	Proliferating NK/T cells
Stk39	1.24668e-161	1.13583	0.386	0.059	2.32979e-157	Proliferating NK/T cells
Gstp3	5.84044e-161	1.18838	0.333	0.046	1.09146e-156	Proliferating NK/T cells
Samd1	2.10289e-160	1.39752	0.494	0.097	3.92988e-156	Proliferating NK/T cells
Rbm3	2.25085e-160	1.2714	0.992	0.707	4.20639e-156	Proliferating NK/T cells
Cdk2	2.29643e-160	1.44088	0.422	0.073	4.29158e-156	Proliferating NK/T cells
Spata24	4.99023e-160	1.0111	0.194	0.016	9.32574e-156	Proliferating NK/T cells
Snrnp40	7.31853e-160	1.31673	0.771	0.216	1.36769e-155	Proliferating NK/T cells
Kpna2	9.21887e-160	1.48569	0.32	0.044	1.72282e-155	Proliferating NK/T cells
Rangap1	2.11424e-159	1.41472	0.733	0.205	3.95108e-155	Proliferating NK/T cells
Tex30	2.13377e-159	1.21827	0.504	0.099	3.98759e-155	Proliferating NK/T cells
Cox5b	6.00926e-159	1.16015	0.998	0.782	1.12301e-154	Proliferating NK/T cells
Lck	7.77288e-159	1.16001	0.935	0.296	1.4526e-154	Proliferating NK/T cells
Sept1	1.48297e-158	1.28337	0.984	0.383	2.77138e-154	Proliferating NK/T cells
Zap70	4.50687e-158	1.11452	0.616	0.134	8.42243e-154	Proliferating NK/T cells
Dynll2	5.26417e-157	1.31251	0.714	0.188	9.83769e-153	Proliferating NK/T cells
E2f2	8.85346e-157	1.24056	0.643	0.154	1.65453e-152	Proliferating NK/T cells
Serpinb9	1.26991e-156	1.09266	0.778	0.221	2.3732e-152	Proliferating NK/T cells
Pycard	1.9883e-156	1.51184	0.969	0.515	3.71573e-152	Proliferating NK/T cells
Atp5j	4.90453e-156	1.12733	0.992	0.754	9.16559e-152	Proliferating NK/T cells
Fhl2	5.03479e-156	1.11555	0.312	0.041	9.40901e-152	Proliferating NK/T cells
Sdf2l1	4.09231e-155	1.19526	0.757	0.207	7.6477e-151	Proliferating NK/T cells
Metrn	3.21716e-154	1.12827	0.324	0.045	6.01223e-150	Proliferating NK/T cells
Fkbp2	4.28766e-154	1.35991	0.843	0.275	8.01278e-150	Proliferating NK/T cells
Nudt21	7.63566e-154	1.33838	0.882	0.303	1.42695e-149	Proliferating NK/T cells
Ms4a4b	1.65914e-153	1.42955	0.951	0.388	3.1006e-149	Proliferating NK/T cells
Nans	1.83506e-153	1.32194	0.755	0.214	3.42936e-149	Proliferating NK/T cells
Trbc2	2.44044e-153	1.73081	0.786	0.267	4.56069e-149	Proliferating NK/T cells
Nup37	2.45857e-153	1.06039	0.282	0.035	4.59457e-149	Proliferating NK/T cells
Gm43305	1.14709e-152	1.77316	0.465	0.093	2.14368e-148	Proliferating NK/T cells
Cgas	1.22172e-152	1.3712	0.404	0.07	2.28316e-148	Proliferating NK/T cells
Nup43	1.28594e-152	1.10618	0.245	0.027	2.40317e-148	Proliferating NK/T cells
Cisd1	1.57371e-152	1.47384	0.725	0.215	2.94096e-148	Proliferating NK/T cells
Lat	8.67009e-152	1.48242	0.665	0.176	1.62027e-147	Proliferating NK/T cells
Ift27	8.92511e-152	1.22195	0.453	0.085	1.66793e-147	Proliferating NK/T cells
AW112010	1.17826e-151	1.27444	0.994	0.583	2.20193e-147	Proliferating NK/T cells
Haus5	1.4374e-151	1.01297	0.259	0.03	2.68622e-147	Proliferating NK/T cells
Mis18a	4.02717e-151	1.31588	0.451	0.085	7.52598e-147	Proliferating NK/T cells
Nudt5	6.03045e-151	1.28683	0.551	0.123	1.12697e-146	Proliferating NK/T cells
Cks2	7.2932e-151	1.10367	0.849	0.287	1.36295e-146	Proliferating NK/T cells
Lsm4	8.21723e-151	1.42001	0.941	0.47	1.53564e-146	Proliferating NK/T cells
Elob	1.62561e-150	1.00138	0.996	0.851	3.03794e-146	Proliferating NK/T cells
Pold1	1.7116e-150	1.07172	0.41	0.071	3.19863e-146	Proliferating NK/T cells
Ptprcap	2.88504e-150	1.28028	0.992	0.436	5.39156e-146	Proliferating NK/T cells
Nudc	4.07809e-150	1.3852	0.9	0.346	7.62113e-146	Proliferating NK/T cells
Sla2	5.49016e-150	1.01105	0.518	0.103	1.026e-145	Proliferating NK/T cells
Trac	2.6907e-149	1.62661	0.649	0.177	5.02838e-145	Proliferating NK/T cells
Fundc2	2.73458e-149	1.3194	0.814	0.257	5.11039e-145	Proliferating NK/T cells
Zfpm1	4.36972e-149	1.04433	0.467	0.088	8.16614e-145	Proliferating NK/T cells
Atp5j2	8.48399e-149	1.07689	0.994	0.805	1.58549e-144	Proliferating NK/T cells
Ctsw	1.28412e-148	1.16354	0.831	0.253	2.39976e-144	Proliferating NK/T cells
Pole3	1.946e-148	1.16621	0.506	0.104	3.63669e-144	Proliferating NK/T cells
Rif1	2.81242e-148	1.33059	0.747	0.213	5.25585e-144	Proliferating NK/T cells
Smco4	7.1244e-148	1.36839	0.365	0.059	1.33141e-143	Proliferating NK/T cells
Anapc5	2.00151e-147	1.42798	0.859	0.311	3.74043e-143	Proliferating NK/T cells
Larp7	8.81479e-147	1.28577	0.88	0.309	1.64731e-142	Proliferating NK/T cells
Tbx21	9.97677e-147	1.02626	0.508	0.103	1.86446e-142	Proliferating NK/T cells
Aarsd1	2.04662e-146	1.16408	0.563	0.127	3.82472e-142	Proliferating NK/T cells
Pa2g4	9.39803e-146	1.33266	0.841	0.282	1.7563e-141	Proliferating NK/T cells
Asrgl1	5.99518e-145	1.22675	0.455	0.088	1.12038e-140	Proliferating NK/T cells
Atp5k	8.59346e-145	1.08626	0.994	0.768	1.60595e-140	Proliferating NK/T cells
Sae1	1.00059e-144	1.28976	0.653	0.171	1.86991e-140	Proliferating NK/T cells
Cxcr3	1.79051e-144	1.35768	0.429	0.081	3.3461e-140	Proliferating NK/T cells
Nxt1	4.33583e-144	1.20307	0.578	0.135	8.1028e-140	Proliferating NK/T cells
Lsm3	4.6061e-144	1.24285	0.775	0.236	8.60789e-140	Proliferating NK/T cells
Ncald	4.31161e-143	1.12795	0.312	0.044	8.05754e-139	Proliferating NK/T cells
Alms1	1.61021e-142	1.10564	0.231	0.026	3.00916e-138	Proliferating NK/T cells
Cd3g	2.48399e-142	1.4917	0.692	0.203	4.64207e-138	Proliferating NK/T cells
Idh3a	2.81886e-142	1.36965	0.588	0.147	5.26788e-138	Proliferating NK/T cells
Snrnp25	2.92136e-142	1.05088	0.541	0.12	5.45945e-138	Proliferating NK/T cells
Zmynd19	5.54792e-142	1.25167	0.345	0.056	1.03679e-137	Proliferating NK/T cells
Mrpl49	3.59267e-141	1.24084	0.457	0.092	6.71399e-137	Proliferating NK/T cells
Etfb	4.72108e-141	1.42259	0.882	0.35	8.82275e-137	Proliferating NK/T cells
Cep57	8.66692e-141	1.12502	0.58	0.136	1.61967e-136	Proliferating NK/T cells
Mrpl58	9.78851e-141	1.28418	0.808	0.26	1.82928e-136	Proliferating NK/T cells
Nelfe	1.93372e-140	1.30811	0.557	0.134	3.61373e-136	Proliferating NK/T cells
Rfc2	3.21388e-140	1.22795	0.753	0.227	6.0061e-136	Proliferating NK/T cells
Snrpf	2.99839e-139	1.21403	0.98	0.648	5.60339e-135	Proliferating NK/T cells
Cbx1	1.23899e-138	1.29013	0.92	0.374	2.31542e-134	Proliferating NK/T cells
0610010K14Rik	1.46822e-138	1.16507	0.749	0.217	2.7438e-134	Proliferating NK/T cells
Alad	2.8188e-138	1.22196	0.318	0.048	5.26777e-134	Proliferating NK/T cells
Crip2	4.62762e-138	1.32144	0.316	0.048	8.6481e-134	Proliferating NK/T cells
Ncaph2	1.71548e-137	1.11956	0.62	0.156	3.20589e-133	Proliferating NK/T cells
Snrpa1	2.10238e-137	1.30513	0.733	0.224	3.92894e-133	Proliferating NK/T cells
Bola3	3.36471e-136	1.14131	0.747	0.22	6.28797e-132	Proliferating NK/T cells
Smarcc1	6.67706e-136	1.2888	0.771	0.246	1.24781e-131	Proliferating NK/T cells
Atp5g3	1.777e-135	1.25719	0.959	0.557	3.32085e-131	Proliferating NK/T cells
Tnfrsf9	7.16079e-135	1.30056	0.347	0.058	1.33821e-130	Proliferating NK/T cells
Gapdh	9.31928e-135	1.18973	0.992	0.782	1.74159e-130	Proliferating NK/T cells
Pdcd1	4.61518e-134	1.55875	0.243	0.03	8.62484e-130	Proliferating NK/T cells
Ikzf2	2.92182e-133	1.54769	0.473	0.106	5.46029e-129	Proliferating NK/T cells
Nup205	4.34032e-133	1.1065	0.433	0.087	8.11118e-129	Proliferating NK/T cells
Mphosph9	5.21952e-133	1.09246	0.371	0.065	9.75423e-129	Proliferating NK/T cells
Set	2.28715e-132	1.19417	0.99	0.707	4.27422e-128	Proliferating NK/T cells
Siva1	2.59347e-132	1.45633	0.749	0.255	4.84667e-128	Proliferating NK/T cells
Sephs1	3.8567e-132	1.03614	0.386	0.071	7.2074e-128	Proliferating NK/T cells
Nfyb	9.89607e-132	1.05937	0.757	0.228	1.84938e-127	Proliferating NK/T cells
Cdt1	1.58546e-131	1.10461	0.473	0.101	2.96291e-127	Proliferating NK/T cells
Crip1	2.97217e-131	1.15413	1	0.826	5.5544e-127	Proliferating NK/T cells
Rad21	2.2011e-130	1.3928	0.894	0.376	4.11341e-126	Proliferating NK/T cells
Mrpl27	2.24625e-130	1.14596	0.525	0.124	4.19779e-126	Proliferating NK/T cells
Snrpd2	3.62703e-130	1.18816	0.982	0.568	6.77819e-126	Proliferating NK/T cells
Hnrnpa3	4.67226e-130	1.09948	0.996	0.791	8.73153e-126	Proliferating NK/T cells
Myef2	7.83281e-130	1.13572	0.476	0.104	1.46379e-125	Proliferating NK/T cells
Nde1	1.60807e-129	1.1542	0.524	0.122	3.00516e-125	Proliferating NK/T cells
Smc3	1.70839e-129	1.20819	0.894	0.352	3.19264e-125	Proliferating NK/T cells
Suz12	2.42873e-129	1.24959	0.843	0.3	4.53882e-125	Proliferating NK/T cells
Crmp1	2.64315e-129	1.05279	0.167	0.014	4.93951e-125	Proliferating NK/T cells
Sms	6.10456e-129	1.15714	0.927	0.391	1.14082e-124	Proliferating NK/T cells
Etaa1	4.1862e-128	1.00119	0.408	0.079	7.82317e-124	Proliferating NK/T cells
A430093F15Rik	4.43364e-128	1.09441	0.198	0.021	8.28559e-124	Proliferating NK/T cells
Lsm8	6.19697e-128	1.18193	0.739	0.228	1.15809e-123	Proliferating NK/T cells
Trbc1	6.70416e-128	1.69164	0.7	0.224	1.25287e-123	Proliferating NK/T cells
Ybx1	1.50774e-127	1.01602	0.994	0.826	2.81766e-123	Proliferating NK/T cells
Eri1	2.9229e-127	1.25345	0.71	0.217	5.46232e-123	Proliferating NK/T cells
Elof1	3.10762e-127	1.16964	0.782	0.252	5.80752e-123	Proliferating NK/T cells
Osbpl3	4.8518e-127	1.02466	0.527	0.124	9.06705e-123	Proliferating NK/T cells
Nup85	1.19881e-126	1.01039	0.341	0.059	2.24034e-122	Proliferating NK/T cells
Gzmm	1.37646e-126	1.39258	0.175	0.016	2.57232e-122	Proliferating NK/T cells
Rbbp4	1.50335e-126	1.25901	0.931	0.456	2.80946e-122	Proliferating NK/T cells
Haus6	1.65379e-126	1.00821	0.371	0.068	3.09061e-122	Proliferating NK/T cells
Cd3d	4.408e-126	1.55544	0.667	0.212	8.23768e-122	Proliferating NK/T cells
Srsf3	6.03805e-126	1.04787	0.992	0.753	1.12839e-121	Proliferating NK/T cells
Ndufa4	7.73517e-126	1.1208	0.982	0.748	1.44555e-121	Proliferating NK/T cells
Gm19585	9.75758e-126	1.16561	0.659	0.185	1.8235e-121	Proliferating NK/T cells
Paxip1	3.15618e-125	1.08797	0.382	0.073	5.89826e-121	Proliferating NK/T cells
Pmm1	6.18344e-125	1.33459	0.343	0.062	1.15556e-120	Proliferating NK/T cells
Naa40	8.7353e-125	1.07287	0.482	0.109	1.63245e-120	Proliferating NK/T cells
Cisd3	2.33887e-124	1.08644	0.488	0.11	4.37088e-120	Proliferating NK/T cells
Atpif1	3.90351e-124	1.1091	0.971	0.486	7.29487e-120	Proliferating NK/T cells
Apobec2	4.45613e-124	1.11576	0.108	0.006	8.32762e-120	Proliferating NK/T cells
Npm3	5.38313e-124	1.18432	0.798	0.277	1.006e-119	Proliferating NK/T cells
Timm8a1	1.16983e-123	1.23444	0.441	0.096	2.18619e-119	Proliferating NK/T cells
Psip1	1.35118e-123	1.15254	0.82	0.29	2.52509e-119	Proliferating NK/T cells
Erg28	2.77031e-123	1.13611	0.639	0.18	5.17716e-119	Proliferating NK/T cells
Nudt1	3.23528e-123	1.06737	0.298	0.047	6.0461e-119	Proliferating NK/T cells
Rps2	4.11172e-123	1.12454	0.996	0.879	7.68398e-119	Proliferating NK/T cells
Ung	1.31379e-122	1.13744	0.184	0.019	2.45521e-118	Proliferating NK/T cells
Reep4	1.41715e-122	1.29977	0.473	0.109	2.64837e-118	Proliferating NK/T cells
A430005L14Rik	4.0997e-122	1.14149	0.484	0.113	7.66152e-118	Proliferating NK/T cells
Sfxn1	1.41875e-121	1.11425	0.663	0.192	2.65136e-117	Proliferating NK/T cells
Cd2	1.17851e-120	1.01663	0.927	0.347	2.2024e-116	Proliferating NK/T cells
Med30	1.73323e-120	1.11782	0.706	0.215	3.23906e-116	Proliferating NK/T cells
Pgp	3.70465e-120	1.1674	0.727	0.232	6.92325e-116	Proliferating NK/T cells
Gm42047	4.65498e-120	1.09709	0.229	0.03	8.69923e-116	Proliferating NK/T cells
Ywhaq	9.20464e-120	1.10328	0.973	0.55	1.72016e-115	Proliferating NK/T cells
Cox5a	1.00445e-119	1.0625	0.982	0.674	1.87712e-115	Proliferating NK/T cells
Uqcr10	1.18772e-119	1.02809	0.982	0.699	2.21962e-115	Proliferating NK/T cells
Cd8a	2.25381e-119	1.85294	0.394	0.086	4.21192e-115	Proliferating NK/T cells
Hspa14	2.26788e-119	1.09253	0.706	0.216	4.23821e-115	Proliferating NK/T cells
Hprt	2.359e-119	1.23588	0.824	0.311	4.4085e-115	Proliferating NK/T cells
Cd28	4.89843e-119	1.06351	0.631	0.177	9.15419e-115	Proliferating NK/T cells
Cdc25a	4.91204e-119	1.10374	0.353	0.066	9.17961e-115	Proliferating NK/T cells
Uchl5	5.14465e-119	1.04307	0.657	0.191	9.61433e-115	Proliferating NK/T cells
Nrarp	7.57335e-119	1.14918	0.333	0.059	1.41531e-114	Proliferating NK/T cells
Aopep	8.48774e-119	1.1019	0.467	0.108	1.58619e-114	Proliferating NK/T cells
Gzma	1.3965e-118	1.65206	0.753	0.304	2.60978e-114	Proliferating NK/T cells
Pcbd2	2.94255e-118	1.01834	0.733	0.227	5.49904e-114	Proliferating NK/T cells
Casp3	1.19963e-117	1.17314	0.739	0.249	2.24187e-113	Proliferating NK/T cells
Hdgf	3.64332e-117	1.20032	0.927	0.439	6.80864e-113	Proliferating NK/T cells
Cenpx	3.71586e-117	1.22344	0.873	0.347	6.94421e-113	Proliferating NK/T cells
Abracl	3.75327e-117	1.0475	0.988	0.648	7.0141e-113	Proliferating NK/T cells
Cep57l1	5.14482e-117	1.01325	0.265	0.04	9.61463e-113	Proliferating NK/T cells
Anxa6	7.71003e-117	1.12266	0.953	0.489	1.44085e-112	Proliferating NK/T cells
Tmem97	1.5106e-116	1.14168	0.3	0.051	2.823e-112	Proliferating NK/T cells
Smc1a	2.22296e-116	1.20523	0.929	0.432	4.15427e-112	Proliferating NK/T cells
Ssna1	6.99584e-116	1.09269	0.786	0.272	1.30738e-111	Proliferating NK/T cells
Ubr7	8.1756e-116	1.00737	0.424	0.091	1.52786e-111	Proliferating NK/T cells
Paics	1.34015e-115	1.24045	0.731	0.249	2.50448e-111	Proliferating NK/T cells
Acot7	4.48011e-114	1.00937	0.659	0.193	8.37242e-110	Proliferating NK/T cells
Park7	5.88719e-114	1.21268	0.951	0.518	1.1002e-109	Proliferating NK/T cells
Gins4	6.38902e-113	1.00978	0.482	0.116	1.19398e-108	Proliferating NK/T cells
Eif1ax	7.2556e-113	1.1826	0.816	0.321	1.35593e-108	Proliferating NK/T cells
Pdap1	8.28808e-113	1.1149	0.965	0.561	1.54888e-108	Proliferating NK/T cells
Impa2	8.61096e-113	1.11677	0.488	0.12	1.60922e-108	Proliferating NK/T cells
Mif	1.67271e-112	1.57855	0.888	0.487	3.12596e-108	Proliferating NK/T cells
Mrps26	3.25601e-112	1.07203	0.69	0.211	6.08482e-108	Proliferating NK/T cells
Themis	3.70732e-112	1.15792	0.41	0.089	6.92824e-108	Proliferating NK/T cells
Ybx3	3.72956e-112	1.1537	0.839	0.325	6.9698e-108	Proliferating NK/T cells
G2e3	4.18638e-112	1.18847	0.467	0.113	7.8235e-108	Proliferating NK/T cells
Cenpc1	4.4561e-112	1.11495	0.439	0.101	8.32756e-108	Proliferating NK/T cells
Hist3h2ba	4.96075e-112	1.06049	0.237	0.034	9.27065e-108	Proliferating NK/T cells
Calm3	6.48791e-112	1.14418	0.943	0.518	1.21246e-107	Proliferating NK/T cells
Mrpl13	1.58928e-111	1.0459	0.635	0.186	2.97005e-107	Proliferating NK/T cells
Bub3	1.83238e-111	1.32402	0.812	0.316	3.42435e-107	Proliferating NK/T cells
Rnaseh2c	2.13171e-111	1.11936	0.906	0.402	3.98375e-107	Proliferating NK/T cells
Mrps36	8.71682e-111	1.07553	0.757	0.259	1.629e-106	Proliferating NK/T cells
Gm49980	9.43657e-111	1.06662	0.284	0.047	1.76351e-106	Proliferating NK/T cells
Nap1l1	1.02001e-110	1.07043	0.978	0.648	1.90619e-106	Proliferating NK/T cells
Nme1	2.58369e-110	1.30953	0.912	0.486	4.8284e-106	Proliferating NK/T cells
Ndufb11	1.00752e-109	1.00835	0.978	0.61	1.88285e-105	Proliferating NK/T cells
Cd226	4.82317e-109	1.23117	0.459	0.112	9.01355e-105	Proliferating NK/T cells
Ppa1	6.58077e-109	1.17782	0.5	0.131	1.22981e-104	Proliferating NK/T cells
Ctps	6.98272e-109	1.01155	0.224	0.031	1.30493e-104	Proliferating NK/T cells
Cd3e	7.74757e-109	1.35745	0.608	0.189	1.44787e-104	Proliferating NK/T cells
Ppat	7.92929e-109	1.03383	0.406	0.089	1.48183e-104	Proliferating NK/T cells
Kcnab2	2.64821e-108	1.0479	0.769	0.27	4.94898e-104	Proliferating NK/T cells
Magoh	3.58802e-108	1.04929	0.906	0.394	6.70529e-104	Proliferating NK/T cells
Maz	5.48861e-108	1.1443	0.737	0.259	1.02571e-103	Proliferating NK/T cells
Pold3	2.77383e-107	1.03982	0.529	0.141	5.18374e-103	Proliferating NK/T cells
Cinp	6.2238e-107	1.02848	0.365	0.076	1.1631e-102	Proliferating NK/T cells
Odf2	2.38254e-106	1.02365	0.59	0.17	4.4525e-102	Proliferating NK/T cells
Fkbp3	5.98398e-106	1.10442	0.875	0.405	1.11829e-101	Proliferating NK/T cells
Rom1	8.2817e-106	1.07238	0.269	0.044	1.54768e-101	Proliferating NK/T cells
Naa10	8.93976e-106	1.07167	0.643	0.199	1.67066e-101	Proliferating NK/T cells
Nudcd2	2.09035e-105	1.09684	0.514	0.137	3.90644e-101	Proliferating NK/T cells
Mthfd2	2.26627e-105	1.08333	0.592	0.174	4.23521e-101	Proliferating NK/T cells
Cd8b1	5.58021e-105	1.91243	0.402	0.098	1.04283e-100	Proliferating NK/T cells
Nrgn	6.96178e-105	1.35243	0.206	0.027	1.30102e-100	Proliferating NK/T cells
Ube2m	1.05361e-104	1.06356	0.89	0.372	1.96898e-100	Proliferating NK/T cells
Cox20	2.41658e-104	1.09104	0.839	0.334	4.5161e-100	Proliferating NK/T cells
Ipo5	1.74448e-103	1.0811	0.478	0.123	3.26008e-99	Proliferating NK/T cells
Prdx4	8.53832e-103	1.19118	0.437	0.108	1.59564e-98	Proliferating NK/T cells
Ldha	1.69067e-102	1.10538	0.982	0.674	3.15952e-98	Proliferating NK/T cells
Mrpl51	2.21153e-102	1.04488	0.82	0.321	4.13291e-98	Proliferating NK/T cells
Mdh1	2.35077e-102	1.07999	0.912	0.422	4.39312e-98	Proliferating NK/T cells
H2-Q7	3.44795e-102	1.06143	0.994	0.696	6.44353e-98	Proliferating NK/T cells
D030056L22Rik	6.1197e-102	1.00155	0.333	0.067	1.14365e-97	Proliferating NK/T cells
Txnl1	8.57136e-101	1.08083	0.841	0.342	1.60182e-96	Proliferating NK/T cells
Atp5o	7.93884e-100	1.03753	0.943	0.519	1.48361e-95	Proliferating NK/T cells
Med9	1.26394e-97	1.00855	0.363	0.08	2.36205e-93	Proliferating NK/T cells
Mrpl57	1.40842e-97	1.0256	0.918	0.446	2.63206e-93	Proliferating NK/T cells
Tesc	6.66845e-97	1.03897	0.282	0.051	1.2462e-92	Proliferating NK/T cells
Actn4	1.07776e-96	1.01663	0.908	0.446	2.01412e-92	Proliferating NK/T cells
Rnf168	1.58656e-96	1.01125	0.443	0.111	2.96497e-92	Proliferating NK/T cells
Mrpl12	1.85259e-96	1.07357	0.671	0.226	3.46212e-92	Proliferating NK/T cells
Cd5	3.64917e-96	1.12571	0.386	0.09	6.81957e-92	Proliferating NK/T cells
Prmt1	2.81704e-95	1.03601	0.696	0.244	5.26448e-91	Proliferating NK/T cells
Gars	2.98663e-95	1.11065	0.68	0.243	5.58141e-91	Proliferating NK/T cells
Slc25a4	3.67769e-95	1.15686	0.796	0.341	6.87287e-91	Proliferating NK/T cells
Gar1	4.66347e-95	1.06508	0.475	0.129	8.71509e-91	Proliferating NK/T cells
Jpt1	8.52458e-95	1.10938	0.965	0.615	1.59307e-90	Proliferating NK/T cells
Hnrnpd	1.45425e-94	1.0434	0.945	0.519	2.7177e-90	Proliferating NK/T cells
Klrk1	1.97011e-93	1.08297	0.669	0.244	3.68174e-89	Proliferating NK/T cells
Hist2h2aa1	2.11408e-93	1.25763	0.751	0.309	3.95079e-89	Proliferating NK/T cells
Rgs16	2.22348e-93	1.22623	0.184	0.025	4.15523e-89	Proliferating NK/T cells
Ndufa5	5.48965e-93	1.03362	0.871	0.419	1.02591e-88	Proliferating NK/T cells
Psmd14	8.27116e-93	1.00358	0.816	0.329	1.54571e-88	Proliferating NK/T cells
Klrd1	2.0284e-90	1.0066	0.731	0.288	3.79068e-86	Proliferating NK/T cells
Tpi1	1.39996e-89	1.03478	0.806	0.332	2.61625e-85	Proliferating NK/T cells
Cd48	1.49625e-88	1.04221	0.937	0.517	2.79618e-84	Proliferating NK/T cells
Sdhb	1.74615e-88	1.00088	0.91	0.451	3.26321e-84	Proliferating NK/T cells
Tuba1c	1.21881e-87	1.3952	0.776	0.352	2.27771e-83	Proliferating NK/T cells
Nhp2	2.75624e-84	1.01347	0.718	0.28	5.15085e-80	Proliferating NK/T cells
Car2	8.68479e-82	1.17981	0.406	0.111	1.62301e-77	Proliferating NK/T cells
Cdkn2d	1.58216e-80	1.04338	0.714	0.283	2.95673e-76	Proliferating NK/T cells
Klre1	3.76149e-80	1.22232	0.522	0.174	7.02947e-76	Proliferating NK/T cells
Arl6ip1	1.31775e-57	1.20236	0.957	0.71	2.46262e-53	Proliferating NK/T cells
Tnfrsf4	9.72946e-51	1.28581	0.159	0.032	1.81824e-46	Proliferating NK/T cells
Klra7	5.74977e-30	1.0058	0.278	0.111	1.07452e-25	Proliferating NK/T cells
Ccdc163	2.93185e-19	1.0961	0.104	0.03	5.47904e-15	Proliferating NK/T cells
Klra1	2.62044e-15	1.16207	0.108	0.038	4.89708e-11	Proliferating NK/T cells
Igkc	0	7.71913	0.955	0.108	0	B cells
Cd79a	0	7.38428	0.996	0.024	0	B cells
Ebf1	0	6.79886	0.982	0.021	0	B cells
Ms4a1	0	6.48647	0.922	0.008	0	B cells
Iglc2	0	6.4302	0.86	0.014	0	B cells
Cd79b	0	6.01573	0.97	0.064	0	B cells
Fcer2a	0	5.97327	0.772	0.006	0	B cells
Ighd	0	5.90295	0.816	0.013	0	B cells
Fcmr	0	5.77085	0.795	0.006	0	B cells
Bank1	0	5.58449	0.868	0.024	0	B cells
Iglc1	0	5.55891	0.472	0.009	0	B cells
Pax5	0	5.40486	0.753	0.003	0	B cells
Gm31243	0	5.29765	0.738	0.007	0	B cells
Cd19	0	5.11387	0.739	0.01	0	B cells
Scd1	0	5.06505	0.715	0.016	0	B cells
Ly6d	0	4.85586	0.932	0.03	0	B cells
Iglc3	0	4.82688	0.834	0.02	0	B cells
Ighm	0	4.76444	0.984	0.377	0	B cells
Vpreb3	0	4.71034	0.461	0.002	0	B cells
H2-Ob	0	4.62963	0.871	0.083	0	B cells
Pou2af1	0	4.62232	0.568	0.007	0	B cells
Ralgps2	0	4.44588	0.839	0.099	0	B cells
Cd55	0	4.4213	0.86	0.099	0	B cells
Cd22	0	4.31677	0.616	0.03	0	B cells
Mzb1	0	4.23707	0.54	0.013	0	B cells
H2-DMb2	0	4.20635	0.785	0.062	0	B cells
Fcrla	0	4.16119	0.618	0.02	0	B cells
Cr2	0	3.92541	0.361	0.005	0	B cells
Siglecg	0	3.92254	0.589	0.048	0	B cells
Cxcr5	0	3.85495	0.444	0.012	0	B cells
Snn	0	3.72416	0.448	0.023	0	B cells
Chst3	0	3.68052	0.336	0.003	0	B cells
Rasgrp3	0	3.67357	0.362	0.016	0	B cells
Mef2c	0	3.63799	0.959	0.305	0	B cells
Spib	0	3.60483	0.51	0.031	0	B cells
Blnk	0	3.59877	0.515	0.029	0	B cells
Blk	0	3.46951	0.442	0.015	0	B cells
Gm30211	0	3.46759	0.281	0.006	0	B cells
Tnfrsf13c	0	3.4107	0.315	0.011	0	B cells
Trim7	0	3.38961	0.327	0.019	0	B cells
Fchsd2	0	3.26648	0.641	0.133	0	B cells
Btla	0	3.20959	0.488	0.075	0	B cells
Gga2	0	3.19691	0.387	0.043	0	B cells
Pgap1	0	3.14106	0.52	0.105	0	B cells
Zfp318	0	3.12477	0.504	0.094	0	B cells
Dennd5b	0	3.116	0.303	0.017	0	B cells
H2-Oa	0	3.02985	0.509	0.078	0	B cells
Fcrl1	0	2.97817	0.319	0.025	0	B cells
Gm15675	0	2.93463	0.263	0.016	0	B cells
Serpinb1a	0	2.89532	0.476	0.075	0	B cells
Sbk1	0	2.89087	0.402	0.073	0	B cells
Bcl11a	0	2.88392	0.604	0.126	0	B cells
H2-Eb2	0	2.85158	0.28	0.02	0	B cells
Chchd10	0	2.80446	0.352	0.067	0	B cells
BE692007	0	2.77946	0.542	0.111	0	B cells
Ccr7	0	2.69838	0.845	0.149	0	B cells
Bach2	0	2.69165	0.524	0.123	0	B cells
Swap70	0	2.69014	0.586	0.173	0	B cells
Mast4	0	2.67407	0.372	0.059	0	B cells
Hvcn1	0	2.66653	0.472	0.105	0	B cells
Cnn3	0	2.65912	0.269	0.031	0	B cells
Fam43a	0	2.65839	0.423	0.106	0	B cells
B3gnt5	0	2.55776	0.39	0.084	0	B cells
Ccr6	0	2.52718	0.232	0.02	0	B cells
Bend5	0	2.51776	0.179	0.005	0	B cells
Aff3	0	2.49205	0.372	0.075	0	B cells
Hs3st1	0	2.45581	0.193	0.013	0	B cells
Sh3bp5	0	2.44356	0.582	0.198	0	B cells
Cd37	0	2.41034	0.917	0.508	0	B cells
Gm8369	0	2.34412	0.567	0.147	0	B cells
Foxp1	0	2.28755	0.955	0.618	0	B cells
Srpk3	0	2.28662	0.154	0.004	0	B cells
Pik3c2b	0	2.26161	0.15	0.006	0	B cells
Strbp	0	2.23722	0.516	0.169	0	B cells
Cecr2	0	2.21939	0.118	0.002	0	B cells
Ptp4a3	0	2.13847	0.616	0.259	0	B cells
Cd83	0	2.12346	0.65	0.202	0	B cells
Cacna1i	0	2.12279	0.11	0.001	0	B cells
Rabgap1l	0	2.10545	0.642	0.281	0	B cells
Cd74	0	2.08868	1	0.592	0	B cells
Il5ra	0	2.07663	0.115	0.001	0	B cells
H2-Aa	0	1.92733	0.987	0.353	0	B cells
H2-Eb1	0	1.81084	0.987	0.32	0	B cells
H2-Ab1	0	1.73768	0.988	0.391	0	B cells
Ets1	0	1.51426	0.894	0.444	0	B cells
Zfp36l1	0	1.45886	0.929	0.66	0	B cells
S1pr1	0	1.4084	0.685	0.244	0	B cells
Gimap6	0	1.39388	0.859	0.389	0	B cells
Jund	0	1.11961	0.981	0.939	0	B cells
Rps27	0	1.00317	0.999	0.994	0	B cells
Myo1e	3.73758e-305	2.52704	0.384	0.089	6.9848e-301	B cells
4930523C07Rik	1.38722e-304	1.67554	0.806	0.52	2.59243e-300	B cells
Dmxl1	3.85191e-303	2.25676	0.596	0.252	7.19845e-299	B cells
Man1a	8.86765e-303	2.16141	0.635	0.294	1.65719e-298	B cells
Txndc16	2.7692e-301	2.36224	0.359	0.077	5.17508e-297	B cells
Ero1lb	1.66494e-298	2.49725	0.472	0.149	3.11144e-294	B cells
Ltb	1.38141e-297	1.44368	0.821	0.44	2.58159e-293	B cells
Snx2	1.45502e-289	2.01604	0.643	0.321	2.71914e-285	B cells
Serp1	7.30828e-286	1.39235	0.853	0.61	1.36577e-281	B cells
Trp53i11	1.04046e-285	2.50347	0.376	0.091	1.94441e-281	B cells
Cd69	2.66601e-285	1.49188	0.743	0.37	4.98223e-281	B cells
H2-DMa	6.39188e-285	1.4904	0.724	0.343	1.19451e-280	B cells
Pkig	5.5042e-283	2.35169	0.496	0.177	1.02863e-278	B cells
Ciita	1.34996e-279	2.13854	0.442	0.124	2.5228e-275	B cells
Hmgn1	1.72586e-271	2.00084	0.576	0.238	3.22528e-267	B cells
Pml	1.45953e-263	2.36115	0.409	0.118	2.72758e-259	B cells
Ikzf3	1.35218e-258	1.83919	0.565	0.224	2.52695e-254	B cells
Cd72	2.80004e-257	2.40871	0.36	0.091	5.23271e-253	B cells
Gm15411	1.24785e-256	1.98085	0.11	0.003	2.33199e-252	B cells
Cd38	2.70684e-253	2.39994	0.338	0.08	5.05853e-249	B cells
Parp1	4.51258e-251	2.17765	0.525	0.22	8.43311e-247	B cells
Sdc4	3.21177e-250	2.02811	0.299	0.058	6.00215e-246	B cells
Tcf4	4.5075e-250	1.42459	0.601	0.276	8.42362e-246	B cells
Stk17b	4.96422e-247	1.06628	0.958	0.879	9.27714e-243	B cells
Pxk	5.83565e-245	2.13831	0.546	0.239	1.09057e-240	B cells
Cmah	7.31838e-242	1.82939	0.508	0.182	1.36766e-237	B cells
Ptprcap	6.2616e-238	1.11639	0.825	0.41	1.17017e-233	B cells
Rel	3.38099e-235	1.67563	0.767	0.516	6.31839e-231	B cells
Ffar1	1.76589e-234	2.08923	0.108	0.004	3.30009e-230	B cells
Tnfrsf13b	2.1663e-231	1.90074	0.506	0.202	4.04838e-227	B cells
Cacna1e	1.11835e-230	2.04259	0.135	0.009	2.08997e-226	B cells
Fam129c	3.64007e-227	2.14689	0.135	0.01	6.80257e-223	B cells
Smap2	6.17613e-225	1.59876	0.714	0.484	1.1542e-220	B cells
Snx8	1.59843e-224	2.27106	0.244	0.044	2.98714e-220	B cells
Bfsp2	6.92259e-222	1.85924	0.101	0.004	1.29369e-217	B cells
Irf4	1.35283e-221	2.35337	0.312	0.076	2.52817e-217	B cells
Rubcn	1.25026e-215	2.32197	0.271	0.059	2.33649e-211	B cells
Grap	1.17637e-214	1.92211	0.516	0.223	2.1984e-210	B cells
Smim14	1.19642e-211	1.79154	0.618	0.357	2.23586e-207	B cells
Cd24a	2.35014e-208	1.07789	0.609	0.244	4.39194e-204	B cells
St6gal1	2.16327e-207	2.21541	0.322	0.086	4.04272e-203	B cells
Trim34a	2.78527e-206	2.16082	0.445	0.171	5.20512e-202	B cells
Il4i1	6.56195e-206	2.28813	0.207	0.033	1.2263e-201	B cells
Syk	3.53432e-199	1.19092	0.801	0.559	6.60494e-195	B cells
Bcar3	7.35543e-199	2.18108	0.162	0.02	1.37458e-194	B cells
Cnp	6.51586e-197	1.81564	0.527	0.257	1.21768e-192	B cells
Cpm	2.44335e-196	2.13293	0.249	0.052	4.56614e-192	B cells
Lrrk2	1.92573e-195	2.12483	0.408	0.149	3.59881e-191	B cells
P2ry10	3.82656e-194	1.57752	0.611	0.309	7.15107e-190	B cells
Tut4	1.78507e-193	1.36083	0.705	0.432	3.33595e-189	B cells
Gpr183	1.2727e-187	1.5227	0.607	0.302	2.37842e-183	B cells
Tsc22d3	2.11547e-187	1.27609	0.786	0.598	3.95338e-183	B cells
Snx30	4.37552e-186	2.19055	0.341	0.108	8.17698e-182	B cells
Cd81	1.33822e-182	1.50674	0.371	0.116	2.50086e-178	B cells
Mtss1	6.66982e-182	1.91939	0.376	0.129	1.24646e-177	B cells
Ephx1	1.25453e-177	2.09801	0.176	0.028	2.34446e-173	B cells
Etnk1	3.51708e-177	1.68424	0.6	0.361	6.57272e-173	B cells
Nap1l1	1.3198e-175	1.14027	0.813	0.641	2.46644e-171	B cells
Pold4	1.48708e-174	1.74268	0.584	0.356	2.77906e-170	B cells
Ripor2	1.15562e-172	1.29076	0.702	0.448	2.15963e-168	B cells
Lynx1	2.08192e-170	1.86164	0.102	0.007	3.8907e-166	B cells
Haao	2.92209e-164	2.07638	0.344	0.121	5.4608e-160	B cells
Pxdc1	2.03622e-162	1.73323	0.166	0.026	3.80528e-158	B cells
Ly86	4.66803e-157	1.34241	0.559	0.283	8.72361e-153	B cells
Slamf6	7.61607e-157	1.51405	0.382	0.139	1.42329e-152	B cells
Wdfy4	2.58152e-156	1.50246	0.455	0.201	4.82435e-152	B cells
Bcl7a	2.43967e-155	2.12949	0.193	0.039	4.55926e-151	B cells
Stap1	4.9015e-155	1.18838	0.678	0.417	9.15993e-151	B cells
Apobec3	5.9883e-154	1.47077	0.612	0.395	1.11909e-149	B cells
Glcci1	1.25255e-149	1.88535	0.359	0.136	2.34077e-145	B cells
Btk	1.98854e-148	1.69582	0.473	0.236	3.71618e-144	B cells
Brwd1	9.5614e-148	1.88258	0.416	0.189	1.78684e-143	B cells
Snx9	1.5901e-144	1.89996	0.372	0.153	2.97158e-140	B cells
Cd200	7.85572e-144	1.78964	0.193	0.041	1.46808e-139	B cells
Tmem163	4.35258e-143	1.78808	0.238	0.063	8.13411e-139	B cells
Tmem108	9.98023e-143	2.00667	0.132	0.019	1.86511e-138	B cells
Dgkd	3.87654e-138	1.53223	0.544	0.332	7.24447e-134	B cells
Stt3b	3.31157e-136	1.78583	0.508	0.303	6.18866e-132	B cells
Map3k1	8.42919e-133	1.44838	0.585	0.403	1.57525e-128	B cells
Snx29	1.21294e-132	1.93668	0.185	0.041	2.26674e-128	B cells
Satb1	3.4759e-128	1.11313	0.588	0.321	6.49576e-124	B cells
Ppp3ca	1.3342e-127	1.20915	0.687	0.531	2.49335e-123	B cells
Gm16152	2.32515e-126	1.65619	0.115	0.016	4.34524e-122	B cells
Cerk	5.71688e-126	1.73459	0.414	0.206	1.06837e-121	B cells
Coq8a	8.99726e-124	1.79119	0.127	0.021	1.68141e-119	B cells
Pmf1	9.26841e-123	1.81263	0.333	0.136	1.73208e-118	B cells
Csk	1.48111e-122	1.15121	0.702	0.592	2.7679e-118	B cells
Csnk1g3	1.31164e-121	1.64872	0.465	0.266	2.45119e-117	B cells
Ttpal	1.94147e-121	1.88572	0.28	0.1	3.62822e-117	B cells
Med13	1.65662e-119	1.4319	0.572	0.39	3.09589e-115	B cells
Add3	1.07639e-116	1.13074	0.695	0.531	2.01157e-112	B cells
Fam214a	6.25442e-116	1.83683	0.28	0.102	1.16883e-111	B cells
Mndal	1.72658e-115	1.08917	0.671	0.505	3.22662e-111	B cells
Sfn	1.28519e-113	2.01066	0.171	0.041	2.40176e-109	B cells
Tec	6.03736e-113	1.5939	0.413	0.209	1.12826e-108	B cells
Rasgef1b	2.0604e-111	1.70596	0.301	0.117	3.85047e-107	B cells
Map4k1	1.52698e-109	1.66955	0.415	0.226	2.85362e-105	B cells
Eml4	2.33755e-108	1.43657	0.498	0.309	4.36842e-104	B cells
Cd40	1.11843e-107	1.69886	0.216	0.066	2.09012e-103	B cells
A630001G21Rik	1.85248e-107	1.71111	0.364	0.177	3.46192e-103	B cells
Mif4gd	3.69638e-107	1.54787	0.39	0.197	6.90779e-103	B cells
Cd2	1.25367e-106	1.04086	0.579	0.341	2.34285e-102	B cells
Ppdpf	1.48607e-105	1.41596	0.507	0.336	2.77718e-101	B cells
Vars	4.16442e-105	1.63168	0.408	0.223	7.78247e-101	B cells
Kmo	8.11292e-105	1.75397	0.205	0.061	1.51614e-100	B cells
Ctso	8.22683e-103	1.76877	0.305	0.13	1.53743e-98	B cells
Cyb561a3	6.18049e-101	1.41346	0.31	0.128	1.15501e-96	B cells
Lbh	2.6976e-100	1.25216	0.579	0.427	5.04128e-96	B cells
Zcchc7	2.45886e-99	1.04435	0.672	0.553	4.59512e-95	B cells
Rabep2	3.21777e-99	1.77482	0.29	0.121	6.01336e-95	B cells
Ifi214	6.59297e-99	1.60052	0.381	0.197	1.23209e-94	B cells
Cxxc5	7.49405e-99	1.72741	0.199	0.061	1.40049e-94	B cells
Helz2	8.62635e-98	1.57405	0.377	0.193	1.61209e-93	B cells
Ktn1	2.43856e-97	1.30948	0.498	0.325	4.55719e-93	B cells
Myc	5.61306e-97	2.38626	0.201	0.064	1.04897e-92	B cells
Tspan32	8.68864e-97	1.44234	0.36	0.174	1.62373e-92	B cells
Gm30054	6.49617e-96	1.70167	0.203	0.064	1.214e-91	B cells
Prkcb	1.76194e-95	1.2252	0.553	0.383	3.29271e-91	B cells
Sh3pxd2a	9.59365e-95	1.84148	0.199	0.063	1.79286e-90	B cells
Ppp1r16b	9.72243e-95	1.41488	0.327	0.145	1.81693e-90	B cells
Arpc5l	1.20043e-94	1.26745	0.555	0.406	2.24337e-90	B cells
Prkce	8.33398e-94	1.7523	0.219	0.075	1.55745e-89	B cells
March1	6.14427e-93	1.37163	0.448	0.261	1.14824e-88	B cells
Carmil1	8.86352e-89	1.41742	0.1	0.018	1.65641e-84	B cells
Tmem123	8.96021e-89	1.12465	0.562	0.417	1.67448e-84	B cells
Lamb3	1.01257e-88	1.5689	0.259	0.103	1.89229e-84	B cells
Cbx7	5.58279e-87	1.58286	0.228	0.084	1.04331e-82	B cells
Phtf2	1.19925e-84	1.61059	0.253	0.103	2.24116e-80	B cells
Prkd2	2.20118e-84	1.5571	0.285	0.126	4.11356e-80	B cells
Tcp11l2	2.32659e-84	1.4179	0.375	0.203	4.34793e-80	B cells
Kynu	1.69693e-83	1.70414	0.175	0.055	3.17122e-79	B cells
Foxo1	1.22821e-80	1.40281	0.388	0.219	2.29527e-76	B cells
Dnajc7	1.74495e-80	1.18907	0.576	0.479	3.26096e-76	B cells
Hip1r	2.03782e-80	1.47793	0.302	0.142	3.80828e-76	B cells
Abhd17b	5.13774e-80	1.57194	0.357	0.196	9.60141e-76	B cells
Arhgef18	8.40118e-80	1.19525	0.478	0.311	1.57001e-75	B cells
Klhl24	9.36914e-80	1.14348	0.542	0.391	1.75091e-75	B cells
Lpgat1	1.55105e-78	1.5419	0.335	0.177	2.89861e-74	B cells
Bmp2k	5.85846e-78	1.35088	0.407	0.241	1.09483e-73	B cells
Tcf3	6.0155e-78	1.56249	0.31	0.155	1.12418e-73	B cells
Plekha2	4.2712e-77	1.28263	0.464	0.312	7.98202e-73	B cells
Slc9a7	1.77658e-75	1.68406	0.152	0.046	3.32007e-71	B cells
Fgfr1op	2.54686e-74	1.62798	0.273	0.128	4.75957e-70	B cells
Ifi209	7.14029e-74	1.21484	0.478	0.331	1.33438e-69	B cells
E330020D12Rik	1.2033e-73	2.17378	0.125	0.033	2.24872e-69	B cells
Lmo2	2.99411e-73	1.57486	0.353	0.202	5.5954e-69	B cells
Msi2	2.81793e-71	1.38114	0.32	0.167	5.26614e-67	B cells
Gpr171	3.42527e-70	1.26426	0.396	0.233	6.40114e-66	B cells
Atg16l2	2.40943e-69	1.58381	0.294	0.15	4.50274e-65	B cells
Pde7a	2.69099e-69	1.23661	0.386	0.228	5.02892e-65	B cells
Tmod3	6.96786e-69	1.07742	0.578	0.486	1.30215e-64	B cells
Phip	1.70349e-67	1.04078	0.555	0.429	3.18347e-63	B cells
Card6	2.72858e-67	1.39457	0.25	0.112	5.09917e-63	B cells
Stoml1	6.62029e-65	1.48641	0.137	0.042	1.2372e-60	B cells
Dmac2	1.8219e-64	1.54573	0.266	0.132	3.40477e-60	B cells
Prr5	9.77654e-64	1.54784	0.145	0.047	1.82704e-59	B cells
Zbtb10	1.86722e-63	1.54767	0.115	0.031	3.48946e-59	B cells
Tsix	7.18996e-63	1.19142	0.492	0.372	1.34366e-58	B cells
Slc12a6	1.11354e-62	1.10018	0.492	0.358	2.08099e-58	B cells
Gpr174	1.13932e-62	1.37279	0.275	0.136	2.12916e-58	B cells
1110059E24Rik	2.21019e-62	1.53973	0.26	0.13	4.1304e-58	B cells
Gm43305	1.31752e-60	1.57426	0.212	0.093	2.46218e-56	B cells
Pold1	3.71204e-60	1.60456	0.179	0.07	6.93705e-56	B cells
Cirbp	7.23205e-60	1.14611	0.438	0.307	1.35153e-55	B cells
Bin1	2.52056e-59	1.27545	0.38	0.248	4.71042e-55	B cells
Cep89	4.26638e-59	1.40779	0.1	0.026	7.97302e-55	B cells
Snx5	3.00486e-58	1.01587	0.532	0.43	5.61548e-54	B cells
Susd1	1.15348e-57	1.39981	0.115	0.033	2.15563e-53	B cells
Gm20559	9.62748e-57	1.30659	0.354	0.221	1.79918e-52	B cells
N4bp2	1.07837e-56	1.40216	0.29	0.159	2.01525e-52	B cells
Plekho1	2.82623e-56	1.25934	0.366	0.232	5.28166e-52	B cells
Clec2i	8.20911e-56	1.41798	0.293	0.163	1.53412e-51	B cells
Arhgap17	8.77101e-56	1.01984	0.522	0.421	1.63913e-51	B cells
Acsf2	1.38701e-55	1.56431	0.135	0.046	2.59205e-51	B cells
Lmbrd1	1.4936e-55	1.34809	0.348	0.218	2.79123e-51	B cells
Tfam	6.65546e-55	1.58015	0.295	0.17	1.24377e-50	B cells
Treml2	9.16549e-55	1.19045	0.265	0.134	1.71285e-50	B cells
Tmem243	5.10282e-54	1.05198	0.464	0.349	9.53616e-50	B cells
A530032D15Rik	1.02257e-53	1.30888	0.119	0.037	1.91098e-49	B cells
Icosl	4.69595e-53	1.40624	0.204	0.091	8.77579e-49	B cells
Sesn1	7.82069e-53	1.2241	0.296	0.166	1.46153e-48	B cells
Pcmtd1	1.41043e-52	1.12953	0.439	0.323	2.63582e-48	B cells
Itpr3	1.60734e-52	1.37955	0.215	0.101	3.0038e-48	B cells
Dnajc9	7.1904e-52	1.18915	0.34	0.209	1.34374e-47	B cells
Farsb	7.85924e-52	1.51562	0.231	0.117	1.46873e-47	B cells
Blvrb	4.41115e-51	1.20156	0.327	0.2	8.24356e-47	B cells
Tmem131l	5.94041e-51	1.09891	0.407	0.285	1.11014e-46	B cells
Zfas1	1.84004e-50	1.00346	0.541	0.46	3.43867e-46	B cells
Irgc1	2.95738e-50	1.57038	0.114	0.037	5.52675e-46	B cells
Sema4b	3.69488e-50	1.36865	0.136	0.049	6.90499e-46	B cells
Rubcnl	8.73861e-50	1.45599	0.13	0.046	1.63307e-45	B cells
Ift140	9.8114e-50	1.42058	0.121	0.04	1.83355e-45	B cells
Abcb10	1.78895e-49	1.60053	0.135	0.049	3.3432e-45	B cells
Gpd1l	9.1218e-48	1.48239	0.228	0.118	1.70468e-43	B cells
Myo1c	2.36577e-46	1.08164	0.369	0.251	4.42115e-42	B cells
Pecam1	2.6352e-46	1.00423	0.327	0.197	4.92466e-42	B cells
Grk6	5.53699e-45	1.00763	0.462	0.367	1.03475e-40	B cells
Irs2	1.31056e-44	1.32224	0.302	0.185	2.44918e-40	B cells
Uchl3	1.39873e-44	1.22471	0.333	0.222	2.61394e-40	B cells
Gm47230	7.60658e-43	1.01862	0.148	0.059	1.42152e-38	B cells
Pou2f1	1.20304e-42	1.35686	0.241	0.133	2.24824e-38	B cells
Snhg12	3.7364e-42	1.11039	0.348	0.235	6.98259e-38	B cells
Bmyc	8.84561e-42	1.31372	0.248	0.142	1.65307e-37	B cells
Cenpa	2.0176e-41	1.04934	0.305	0.187	3.77049e-37	B cells
Abca1	2.88708e-41	1.04273	0.22	0.112	5.39538e-37	B cells
Lpcat1	4.76496e-41	1.51768	0.196	0.1	8.90477e-37	B cells
Pikfyve	8.9522e-41	1.37156	0.265	0.16	1.67299e-36	B cells
Chd6	5.87649e-40	1.21399	0.322	0.216	1.0982e-35	B cells
Dhx57	2.10866e-37	1.43113	0.183	0.093	3.94066e-33	B cells
Il21r	3.28439e-37	1.16374	0.31	0.205	6.13788e-33	B cells
Zfp831	3.77926e-37	1.07306	0.141	0.06	7.06269e-33	B cells
Neil1	1.07851e-36	1.42085	0.118	0.046	2.01552e-32	B cells
Arid3b	4.69353e-36	1.13842	0.238	0.137	8.77128e-32	B cells
Gm15987	5.16391e-36	1.13348	0.24	0.139	9.65031e-32	B cells
Zfp507	9.66776e-36	1.18024	0.118	0.046	1.80671e-31	B cells
P2rx4	1.23996e-35	1.27614	0.299	0.202	2.31724e-31	B cells
Pkib	1.80443e-35	1.21856	0.215	0.119	3.37212e-31	B cells
Fam169b	3.38849e-35	1.08795	0.159	0.075	6.3324e-31	B cells
Rfc1	6.35405e-35	1.16119	0.37	0.286	1.18744e-30	B cells
Avl9	9.74012e-34	1.04941	0.332	0.236	1.82023e-29	B cells
Ppp3cc	1.28852e-33	1.0696	0.189	0.099	2.40798e-29	B cells
Snrnp25	2.76764e-32	1.52704	0.212	0.125	5.17216e-28	B cells
Gm5914	5.73823e-32	1.16965	0.116	0.048	1.07236e-27	B cells
Cd86	6.84176e-32	1.20052	0.259	0.166	1.27859e-27	B cells
Ftx	7.7905e-32	1.21119	0.11	0.045	1.45589e-27	B cells
Traf5	1.14777e-31	1.37024	0.175	0.093	2.14495e-27	B cells
Syvn1	2.04085e-31	1.26873	0.221	0.133	3.81394e-27	B cells
Txndc5	4.85352e-31	1.26853	0.278	0.193	9.07025e-27	B cells
Ap1s3	6.47376e-31	1.35948	0.144	0.07	1.20982e-26	B cells
Kctd3	7.29423e-31	1.34579	0.103	0.042	1.36315e-26	B cells
Dtx1	1.20037e-30	1.05283	0.114	0.048	2.24326e-26	B cells
Rcc2	2.52097e-29	1.03031	0.362	0.287	4.71119e-25	B cells
Slc4a7	4.76416e-28	1.10977	0.32	0.239	8.90326e-24	B cells
Pafah1b3	4.24864e-27	1.23373	0.208	0.127	7.93986e-23	B cells
Pdia4	5.04036e-27	1.0126	0.342	0.264	9.41943e-23	B cells
C1galt1	4.05003e-26	1.08271	0.322	0.249	7.56869e-22	B cells
Twsg1	1.00499e-25	1.28198	0.113	0.052	1.87813e-21	B cells
Cdc25b	1.55161e-25	1.02494	0.175	0.099	2.89965e-21	B cells
Mgrn1	4.38226e-25	1.19785	0.221	0.145	8.18957e-21	B cells
Alkbh1	5.24901e-25	1.08027	0.296	0.219	9.80934e-21	B cells
Tfrc	6.74451e-25	1.11007	0.182	0.106	1.26041e-20	B cells
Rfk	5.2692e-23	1.14686	0.22	0.147	9.84708e-19	B cells
Eif2ak3	6.33662e-22	1.081	0.19	0.119	1.18419e-17	B cells
Trim5	4.59653e-21	1.0697	0.184	0.116	8.58999e-17	B cells
Tpst1	4.79418e-21	1.22528	0.102	0.05	8.95937e-17	B cells
Clasp1	6.95397e-21	1.12745	0.224	0.155	1.29956e-16	B cells
Nrm	1.40528e-20	1.18752	0.185	0.12	2.62619e-16	B cells
Vav2	2.14395e-20	1.21511	0.144	0.083	4.00662e-16	B cells
Hhex	4.26656e-20	1.02405	0.281	0.214	7.97334e-16	B cells
Scai	6.43535e-20	1.07629	0.143	0.081	1.20264e-15	B cells
Nsmce1	7.80791e-20	1.02156	0.276	0.211	1.45914e-15	B cells
Ddx41	9.1564e-20	1.01842	0.316	0.261	1.71115e-15	B cells
Trim59	2.54185e-18	1.12521	0.168	0.106	4.7502e-14	B cells
Fgd2	4.35479e-18	1.00921	0.208	0.143	8.13824e-14	B cells
Cdt1	9.87599e-18	1.13591	0.167	0.107	1.84563e-13	B cells
Zc3h12d	1.68599e-17	1.02267	0.194	0.132	3.15078e-13	B cells
Cse1l	4.84987e-17	1.09776	0.242	0.184	9.06343e-13	B cells
Manea	5.0486e-17	1.12969	0.115	0.065	9.43483e-13	B cells
Zbtb18	1.38717e-16	1.07115	0.162	0.105	2.59234e-12	B cells
Upf3b	6.81186e-16	1.03139	0.236	0.18	1.273e-11	B cells
Aida	5.31309e-15	1.05178	0.239	0.186	9.9291e-11	B cells
Sufu	3.02415e-13	1.00721	0.113	0.068	5.65152e-09	B cells
Rps6ka5	6.71837e-13	1.1585	0.145	0.098	1.25553e-08	B cells
Usp6nl	7.79133e-11	1.06492	0.124	0.083	1.45604e-06	B cells
Il17a	0	4.7156	0.264	0.002	0	gdTcells_MAIT
Cxcr6	0	4.70056	0.912	0.049	0	gdTcells_MAIT
Il1rl1	0	4.46115	0.345	0.017	0	gdTcells_MAIT
Tcrg-C1	0	4.34651	0.458	0.01	0	gdTcells_MAIT
Ptpn13	0	4.14499	0.327	0.015	0	gdTcells_MAIT
Stab2	0	4.11618	0.239	0.002	0	gdTcells_MAIT
Actn2	0	4.02988	0.464	0.014	0	gdTcells_MAIT
Rora	0	4.02705	0.809	0.08	0	gdTcells_MAIT
Pxdc1	0	4.0123	0.555	0.03	0	gdTcells_MAIT
Hlf	0	3.88622	0.345	0.005	0	gdTcells_MAIT
Il2ra	0	3.87973	0.612	0.025	0	gdTcells_MAIT
Arg1	0	3.7365	0.333	0.01	0	gdTcells_MAIT
Trgv2	0	3.67618	0.327	0.016	0	gdTcells_MAIT
Ramp3	0	3.65137	0.461	0.024	0	gdTcells_MAIT
Tmem176a	0	3.62796	0.818	0.099	0	gdTcells_MAIT
Podnl1	0	3.55	0.479	0.018	0	gdTcells_MAIT
Il7r	0	3.53587	0.991	0.191	0	gdTcells_MAIT
Krt83	0	3.53573	0.388	0.013	0	gdTcells_MAIT
Rorc	0	3.46823	0.367	0.003	0	gdTcells_MAIT
5830411N06Rik	0	3.43667	0.173	0.002	0	gdTcells_MAIT
Tcrg-C4	0	3.35652	0.415	0.019	0	gdTcells_MAIT
Ccdc184	0	3.25866	0.2	0.002	0	gdTcells_MAIT
Olfr1259	0	3.25596	0.218	0.001	0	gdTcells_MAIT
Il23r	0	3.24173	0.297	0.001	0	gdTcells_MAIT
Il17re	0	3.17149	0.306	0.003	0	gdTcells_MAIT
Tmem176b	0	3.05925	0.839	0.128	0	gdTcells_MAIT
Ly6g5b	0	3.00739	0.294	0.007	0	gdTcells_MAIT
St6galnac3	0	2.98641	0.455	0.029	0	gdTcells_MAIT
Il1r1	0	2.97348	0.288	0.006	0	gdTcells_MAIT
Pard3	0	2.92439	0.215	0.003	0	gdTcells_MAIT
Pcsk1	0	2.91882	0.173	0.001	0	gdTcells_MAIT
Coro2b	0	2.87276	0.291	0.004	0	gdTcells_MAIT
Abi3bp	0	2.83113	0.179	0.002	0	gdTcells_MAIT
Ccr8	0	2.76697	0.221	0.005	0	gdTcells_MAIT
Tnfrsf25	0	2.75587	0.339	0.017	0	gdTcells_MAIT
Dkk3	0	2.71657	0.185	0.002	0	gdTcells_MAIT
Il17rb	0	2.58453	0.212	0.004	0	gdTcells_MAIT
Npnt	0	2.53924	0.2	0.003	0	gdTcells_MAIT
Kcnk1	0	2.48662	0.17	0.001	0	gdTcells_MAIT
Sox13	0	2.38727	0.164	0.001	0	gdTcells_MAIT
Ret	0	2.36321	0.152	0.002	0	gdTcells_MAIT
Cntn1	0	2.35065	0.121	0.001	0	gdTcells_MAIT
Adam12	0	2.23877	0.185	0.002	0	gdTcells_MAIT
Gm9961	0	2.11548	0.142	0	0	gdTcells_MAIT
Lingo4	0	2.07291	0.155	0.001	0	gdTcells_MAIT
Rbpms2	0	2.0149	0.133	0.001	0	gdTcells_MAIT
Fam83a	0	1.9426	0.133	0.001	0	gdTcells_MAIT
Zfp462	0	1.72292	0.124	0.001	0	gdTcells_MAIT
Csf2	2.41973e-304	3.3809	0.133	0.001	4.522e-300	gdTcells_MAIT
Cd163l1	8.69984e-299	4.05968	0.176	0.003	1.62583e-294	gdTcells_MAIT
Icos	7.30852e-286	3.54013	0.748	0.117	1.36582e-281	gdTcells_MAIT
Trdv4	7.31811e-280	4.20635	0.358	0.023	1.36761e-275	gdTcells_MAIT
Tmem64	4.00142e-276	3.28007	0.745	0.12	7.47786e-272	gdTcells_MAIT
Aqp3	2.87006e-257	2.45713	0.2	0.006	5.36358e-253	gdTcells_MAIT
Ccr4	6.21067e-256	2.66238	0.288	0.015	1.16065e-251	gdTcells_MAIT
Il5	2.47652e-255	3.03933	0.103	0.001	4.62812e-251	gdTcells_MAIT
Vipr2	9.45828e-251	2.50854	0.124	0.002	1.76756e-246	gdTcells_MAIT
Tcrg-C2	3.36947e-249	3.24543	0.27	0.014	6.29686e-245	gdTcells_MAIT
Tcrg-V4	4.01981e-247	1.74671	0.127	0.002	7.51222e-243	gdTcells_MAIT
Sdc1	2.06389e-239	2.702	0.224	0.009	3.857e-235	gdTcells_MAIT
Tcrg-V6	7.73668e-235	2.28591	0.1	0.001	1.44583e-230	gdTcells_MAIT
Bcl11b	1.74611e-233	2.50083	0.812	0.153	3.26312e-229	gdTcells_MAIT
Maf	1.63386e-231	2.95226	0.852	0.197	3.05336e-227	gdTcells_MAIT
Ccl1	1.08493e-228	4.71742	0.13	0.002	2.02752e-224	gdTcells_MAIT
Epas1	6.95217e-227	2.75267	0.333	0.025	1.29922e-222	gdTcells_MAIT
Prrt1	4.73785e-225	2.878	0.358	0.029	8.8541e-221	gdTcells_MAIT
Ar	1.5332e-214	3.23403	0.448	0.05	2.86525e-210	gdTcells_MAIT
Nav2	5.40769e-213	2.75642	0.379	0.035	1.01059e-208	gdTcells_MAIT
Calca	1.92969e-212	3.45431	0.118	0.002	3.60621e-208	gdTcells_MAIT
Bmp7	5.16585e-211	2.31918	0.188	0.007	9.65394e-207	gdTcells_MAIT
Nr1d1	1.50421e-209	1.8921	0.145	0.004	2.81106e-205	gdTcells_MAIT
Kcnc1	5.59815e-204	2.6325	0.218	0.011	1.04618e-199	gdTcells_MAIT
Ppp1r14c	7.99907e-204	1.57126	0.106	0.002	1.49487e-199	gdTcells_MAIT
Plcb4	1.16571e-201	2.51455	0.318	0.025	2.17848e-197	gdTcells_MAIT
Ramp1	1.31922e-197	3.00395	0.845	0.255	2.46535e-193	gdTcells_MAIT
Acsbg1	1.04247e-196	2.97313	0.355	0.033	1.94817e-192	gdTcells_MAIT
Gata3	1.568e-195	3.45752	0.688	0.139	2.93028e-191	gdTcells_MAIT
Lif	5.86036e-179	3.27305	0.209	0.012	1.09518e-174	gdTcells_MAIT
Prelid2	4.5335e-170	2.78604	0.288	0.025	8.4722e-166	gdTcells_MAIT
F2r	1.04769e-162	2.84351	0.439	0.063	1.95792e-158	gdTcells_MAIT
Itk	6.27861e-159	2.26639	0.788	0.209	1.17335e-154	gdTcells_MAIT
Xlr4c	2.03507e-158	2.37177	0.279	0.025	3.80314e-154	gdTcells_MAIT
She	2.46864e-155	1.69674	0.103	0.003	4.6134e-151	gdTcells_MAIT
C030034L19Rik	2.97463e-153	1.69337	0.13	0.005	5.55899e-149	gdTcells_MAIT
Rab4a	1.00056e-152	2.25636	0.242	0.019	1.86985e-148	gdTcells_MAIT
Thy1	1.8149e-149	2.15202	0.803	0.226	3.39169e-145	gdTcells_MAIT
Ero1l	4.83816e-147	2.54858	0.624	0.149	9.04155e-143	gdTcells_MAIT
Tnfsf11	9.4019e-145	2.15708	0.215	0.016	1.75703e-140	gdTcells_MAIT
Cers4	8.21214e-142	2.44399	0.509	0.094	1.53468e-137	gdTcells_MAIT
Blk	1.18467e-138	2.70678	0.385	0.054	2.21391e-134	gdTcells_MAIT
Serpinb1a	6.85649e-135	2.34684	0.539	0.108	1.28134e-130	gdTcells_MAIT
Cd3g	1.35219e-134	2.21306	0.736	0.208	2.52698e-130	gdTcells_MAIT
Nebl	3.04801e-133	2.27685	0.239	0.022	5.69613e-129	gdTcells_MAIT
Mmp25	7.27225e-133	2.13967	0.364	0.049	1.35904e-128	gdTcells_MAIT
Sept8	9.44857e-131	2.36576	0.236	0.022	1.76575e-126	gdTcells_MAIT
Nrip1	5.92705e-130	2.38581	0.861	0.388	1.10765e-125	gdTcells_MAIT
Bik	1.52945e-125	1.66958	0.118	0.005	2.85824e-121	gdTcells_MAIT
Axin2	1.07071e-124	2.253	0.264	0.028	2.00095e-120	gdTcells_MAIT
Xkr6	2.05898e-123	1.48959	0.1	0.003	3.84783e-119	gdTcells_MAIT
Trdc	1.48601e-122	4.248	0.297	0.038	2.77705e-118	gdTcells_MAIT
Areg	5.57897e-121	3.94515	0.221	0.021	1.0426e-116	gdTcells_MAIT
Cish	9.38965e-121	2.31426	0.512	0.108	1.75474e-116	gdTcells_MAIT
Kcnmb4	7.8592e-120	1.74128	0.148	0.009	1.46873e-115	gdTcells_MAIT
Ikzf2	7.81948e-117	1.53674	0.521	0.109	1.46131e-112	gdTcells_MAIT
Slc6a13	2.63031e-116	2.07613	0.179	0.014	4.91552e-112	gdTcells_MAIT
Znrf1	1.26008e-114	2.18897	0.691	0.226	2.35483e-110	gdTcells_MAIT
Cryba4	3.48027e-114	2.44772	0.152	0.01	6.50393e-110	gdTcells_MAIT
Trbc2	9.0505e-113	1.403	0.861	0.272	1.69136e-108	gdTcells_MAIT
Tespa1	4.77381e-111	2.20699	0.561	0.137	8.9213e-107	gdTcells_MAIT
Cd40lg	6.06002e-111	2.77975	0.233	0.025	1.1325e-106	gdTcells_MAIT
Chdh	7.11826e-110	1.69084	0.142	0.009	1.33026e-105	gdTcells_MAIT
Rnf128	1.12408e-109	2.61491	0.176	0.014	2.10069e-105	gdTcells_MAIT
4932438H23Rik	9.48374e-107	1.48342	0.1	0.004	1.77232e-102	gdTcells_MAIT
Mgat5	1.01515e-106	2.17694	0.561	0.149	1.89711e-102	gdTcells_MAIT
Camk2n1	1.51512e-106	2.03431	0.421	0.081	2.83145e-102	gdTcells_MAIT
Smco4	6.08397e-106	2.15876	0.364	0.063	1.13697e-101	gdTcells_MAIT
Emb	9.07132e-104	1.80769	0.952	0.557	1.69525e-99	gdTcells_MAIT
Zbtb16	9.72015e-104	2.22296	0.321	0.05	1.8165e-99	gdTcells_MAIT
Camk4	6.45836e-103	2.17796	0.321	0.05	1.20694e-98	gdTcells_MAIT
Zap70	2.72016e-102	1.99359	0.548	0.141	5.08344e-98	gdTcells_MAIT
Rab27b	2.82121e-102	1.93728	0.124	0.007	5.27227e-98	gdTcells_MAIT
Il12rb1	7.65527e-101	2.09644	0.215	0.023	1.43062e-96	gdTcells_MAIT
Pde5a	5.41222e-100	1.99463	0.179	0.016	1.01144e-95	gdTcells_MAIT
Cd226	1.22226e-97	2.09922	0.488	0.115	2.28415e-93	gdTcells_MAIT
Lat	1.24989e-97	1.86337	0.624	0.182	2.33579e-93	gdTcells_MAIT
Ltb	2.23097e-97	1.70359	0.918	0.471	4.16924e-93	gdTcells_MAIT
Skap1	1.42482e-96	1.65165	0.764	0.266	2.66271e-92	gdTcells_MAIT
Ccr2	1.76553e-96	1.57622	0.855	0.345	3.29942e-92	gdTcells_MAIT
S100a4	4.18416e-96	1.50639	0.952	0.462	7.81935e-92	gdTcells_MAIT
Rgcc	9.60823e-96	2.28169	0.661	0.229	1.79559e-91	gdTcells_MAIT
Mdfic	4.43128e-95	2.66674	0.491	0.133	8.28117e-91	gdTcells_MAIT
B3galt2	1.92821e-94	1.86755	0.106	0.006	3.60344e-90	gdTcells_MAIT
Furin	5.63742e-94	3.26102	0.745	0.33	1.05352e-89	gdTcells_MAIT
Cd3e	9.18211e-92	2.07844	0.615	0.194	1.71595e-87	gdTcells_MAIT
Cd82	1.17288e-91	1.8088	0.824	0.39	2.19188e-87	gdTcells_MAIT
Xlr4a	1.70334e-90	2.02468	0.23	0.03	3.18319e-86	gdTcells_MAIT
Fam102a	1.71231e-89	1.93233	0.57	0.169	3.19996e-85	gdTcells_MAIT
Ncor1	1.44411e-88	1.36703	0.961	0.771	2.69875e-84	gdTcells_MAIT
Lmna	1.65977e-88	1.89187	0.667	0.232	3.10179e-84	gdTcells_MAIT
Edaradd	3.02433e-85	1.64237	0.139	0.011	5.65187e-81	gdTcells_MAIT
Xlr4b	1.29395e-84	1.99963	0.33	0.063	2.41814e-80	gdTcells_MAIT
Gpr183	3.86615e-84	1.95562	0.742	0.325	7.22505e-80	gdTcells_MAIT
Sdc4	5.30617e-84	2.26951	0.373	0.078	9.91617e-80	gdTcells_MAIT
Prnp	1.70879e-83	2.59377	0.203	0.025	3.19339e-79	gdTcells_MAIT
Faah	3.21762e-83	2.14535	0.364	0.076	6.0131e-79	gdTcells_MAIT
Cysltr1	4.95904e-83	2.39923	0.367	0.08	9.26746e-79	gdTcells_MAIT
Crmp1	1.11314e-82	2.00445	0.164	0.016	2.08023e-78	gdTcells_MAIT
Apbb2	2.4018e-82	1.78909	0.118	0.008	4.48849e-78	gdTcells_MAIT
Pdcd1	2.84259e-82	2.23767	0.233	0.033	5.31223e-78	gdTcells_MAIT
Il2	4.54675e-82	2.42643	0.115	0.008	8.49697e-78	gdTcells_MAIT
Tox	1.152e-81	2.00861	0.473	0.123	2.15286e-77	gdTcells_MAIT
Sytl1	1.5434e-81	2.02679	0.191	0.023	2.8843e-77	gdTcells_MAIT
Aebp2	1.14963e-80	1.87524	0.733	0.343	2.14844e-76	gdTcells_MAIT
Ltb4r1	1.35439e-80	1.75765	0.597	0.196	2.53109e-76	gdTcells_MAIT
Lysmd2	3.24376e-78	1.93252	0.194	0.024	6.06195e-74	gdTcells_MAIT
Ctla2a	7.0516e-78	2.1407	0.621	0.215	1.3178e-73	gdTcells_MAIT
Ikzf3	1.49963e-77	1.74523	0.658	0.252	2.80252e-73	gdTcells_MAIT
Espn	3.49228e-77	1.74823	0.127	0.011	6.52637e-73	gdTcells_MAIT
Uhrf2	5.07828e-76	2.15688	0.679	0.313	9.49029e-72	gdTcells_MAIT
Itgb7	6.82165e-76	1.54278	0.852	0.506	1.27483e-71	gdTcells_MAIT
Sptssa	2.80023e-75	2.16747	0.645	0.294	5.23308e-71	gdTcells_MAIT
Tecpr1	9.23186e-74	1.658	0.621	0.228	1.72525e-69	gdTcells_MAIT
Il18r1	1.31867e-72	2.15058	0.576	0.211	2.46434e-68	gdTcells_MAIT
Sept11	3.18819e-72	1.62386	0.752	0.373	5.95809e-68	gdTcells_MAIT
Frmd4b	1.34281e-71	2.44072	0.391	0.103	2.50944e-67	gdTcells_MAIT
Gabbr1	1.65949e-70	1.86757	0.33	0.071	3.10125e-66	gdTcells_MAIT
Spry1	2.46481e-70	1.68245	0.115	0.009	4.60623e-66	gdTcells_MAIT
Mns1	2.69813e-70	2.64209	0.258	0.047	5.04227e-66	gdTcells_MAIT
5830444B04Rik	8.8543e-70	1.54103	0.106	0.008	1.65469e-65	gdTcells_MAIT
Sema6d	4.19929e-69	2.25712	0.173	0.022	7.84763e-65	gdTcells_MAIT
Klk8	1.86065e-68	1.82105	0.367	0.089	3.47719e-64	gdTcells_MAIT
Eya2	7.76445e-68	1.671	0.155	0.018	1.45102e-63	gdTcells_MAIT
Asb2	3.02913e-67	2.11963	0.179	0.024	5.66084e-63	gdTcells_MAIT
Smyd2	2.02188e-63	1.89801	0.206	0.034	3.77849e-59	gdTcells_MAIT
Jag1	2.44746e-63	1.97058	0.133	0.014	4.57381e-59	gdTcells_MAIT
Gm43445	3.60366e-63	2.14073	0.224	0.039	6.73452e-59	gdTcells_MAIT
D16Ertd472e	3.63931e-63	1.59656	0.697	0.341	6.80114e-59	gdTcells_MAIT
Il2rg	8.84766e-63	1.22214	0.897	0.606	1.65345e-58	gdTcells_MAIT
Socs2	2.48383e-62	1.84262	0.248	0.047	4.64178e-58	gdTcells_MAIT
Cd96	4.57717e-62	1.65145	0.37	0.096	8.55381e-58	gdTcells_MAIT
Rarg	5.33504e-62	2.01335	0.373	0.105	9.97013e-58	gdTcells_MAIT
Ets1	5.93179e-62	1.01036	0.933	0.482	1.10853e-57	gdTcells_MAIT
Ccr6	7.89817e-62	1.9015	0.224	0.039	1.47601e-57	gdTcells_MAIT
Adgrg5	1.02125e-61	1.9052	0.255	0.051	1.90852e-57	gdTcells_MAIT
Ahcyl2	3.73279e-61	2.05892	0.512	0.197	6.97584e-57	gdTcells_MAIT
Cd3d	5.53603e-61	1.41604	0.603	0.219	1.03457e-56	gdTcells_MAIT
Inpp4b	1.12129e-60	2.33092	0.412	0.124	2.09547e-56	gdTcells_MAIT
Nedd4	1.39666e-60	1.83648	0.43	0.134	2.61009e-56	gdTcells_MAIT
Ptprcap	1.63719e-60	1.07357	0.894	0.445	3.05959e-56	gdTcells_MAIT
Man2a2	7.1768e-60	2.01639	0.394	0.118	1.3412e-55	gdTcells_MAIT
Rexo2	7.93674e-60	1.57616	0.688	0.361	1.48322e-55	gdTcells_MAIT
Ndfip1	9.27576e-60	1.21914	0.885	0.628	1.73345e-55	gdTcells_MAIT
Kit	1.00741e-59	2.64821	0.252	0.051	1.88264e-55	gdTcells_MAIT
Ssbp3	4.27293e-59	1.79442	0.524	0.202	7.98525e-55	gdTcells_MAIT
Rinl	9.5712e-59	1.39313	0.752	0.403	1.78867e-54	gdTcells_MAIT
Sh2d2a	2.05923e-57	1.3391	0.6	0.227	3.84828e-53	gdTcells_MAIT
Klf5	2.97694e-57	1.95877	0.112	0.011	5.56331e-53	gdTcells_MAIT
Zfp36l1	5.07396e-57	1.30152	0.93	0.683	9.48222e-53	gdTcells_MAIT
Lmo4	5.25217e-57	1.76508	0.83	0.547	9.81526e-53	gdTcells_MAIT
Sema4f	5.95599e-57	1.47943	0.121	0.013	1.11306e-52	gdTcells_MAIT
Ccnd2	1.11615e-56	1.14708	0.9	0.542	2.08586e-52	gdTcells_MAIT
Dgat1	1.88431e-56	1.61538	0.558	0.22	3.5214e-52	gdTcells_MAIT
Ppp1r16b	8.22671e-56	1.57132	0.473	0.158	1.53741e-51	gdTcells_MAIT
Eprs	1.01169e-55	1.66874	0.673	0.34	1.89065e-51	gdTcells_MAIT
Cdon	1.09323e-55	1.60738	0.152	0.021	2.04303e-51	gdTcells_MAIT
Itgb3	2.32741e-55	1.7831	0.273	0.061	4.34947e-51	gdTcells_MAIT
Galnt12	3.86946e-55	1.99294	0.279	0.065	7.23124e-51	gdTcells_MAIT
S100a10	6.51991e-54	1.06809	0.942	0.657	1.21844e-49	gdTcells_MAIT
Saraf	7.37049e-54	1.23789	0.839	0.536	1.3774e-49	gdTcells_MAIT
Gpr34	1.51115e-53	1.81898	0.164	0.025	2.82404e-49	gdTcells_MAIT
Gm17745	1.54341e-53	1.80129	0.227	0.045	2.88433e-49	gdTcells_MAIT
Atp2b4	2.93682e-53	1.83037	0.47	0.173	5.48832e-49	gdTcells_MAIT
Il27ra	3.2308e-53	1.68591	0.339	0.093	6.03771e-49	gdTcells_MAIT
Ptpn7	9.09546e-53	1.62317	0.542	0.225	1.69976e-48	gdTcells_MAIT
Chd3	6.17553e-52	1.21766	0.755	0.389	1.15408e-47	gdTcells_MAIT
Aak1	1.09114e-51	1.58141	0.545	0.23	2.03912e-47	gdTcells_MAIT
Gclc	2.50272e-51	1.96045	0.373	0.117	4.67709e-47	gdTcells_MAIT
Tnik	2.5454e-50	1.46507	0.439	0.147	4.75684e-46	gdTcells_MAIT
Il9r	4.87661e-50	1.5955	0.118	0.014	9.1134e-46	gdTcells_MAIT
Odc1	8.0279e-50	1.95719	0.63	0.318	1.50025e-45	gdTcells_MAIT
Slco3a1	3.09583e-49	1.52426	0.5	0.193	5.78549e-45	gdTcells_MAIT
Rbl2	4.92127e-49	1.38802	0.615	0.288	9.19687e-45	gdTcells_MAIT
Wls	2.78621e-48	1.76304	0.448	0.173	5.20688e-44	gdTcells_MAIT
Itpr2	3.22628e-48	1.37344	0.652	0.328	6.02927e-44	gdTcells_MAIT
Igf1r	7.08446e-48	1.3841	0.409	0.132	1.32394e-43	gdTcells_MAIT
Nr4a3	1.0652e-47	1.8348	0.476	0.182	1.99064e-43	gdTcells_MAIT
Tnfaip3	1.18076e-47	1.18413	0.845	0.527	2.2066e-43	gdTcells_MAIT
Gm15655	1.78327e-47	1.3728	0.109	0.013	3.33257e-43	gdTcells_MAIT
Fnbp1	4.50025e-47	1.29346	0.755	0.461	8.41006e-43	gdTcells_MAIT
Sit1	2.20334e-46	1.70407	0.197	0.039	4.1176e-42	gdTcells_MAIT
Nr3c1	8.70713e-46	1.43707	0.724	0.446	1.62719e-41	gdTcells_MAIT
Itgae	1.73579e-45	1.61727	0.194	0.038	3.24385e-41	gdTcells_MAIT
Cd69	1.10162e-44	1.26608	0.73	0.403	2.05871e-40	gdTcells_MAIT
Paxbp1	2.2669e-44	1.73881	0.555	0.271	4.23638e-40	gdTcells_MAIT
Emp1	4.43485e-44	1.82987	0.242	0.06	8.28785e-40	gdTcells_MAIT
Rbpj	6.24938e-44	1.38004	0.706	0.399	1.16788e-39	gdTcells_MAIT
Aff4	6.33245e-44	1.6012	0.636	0.354	1.18341e-39	gdTcells_MAIT
Rasal3	7.23593e-44	1.25626	0.552	0.236	1.35225e-39	gdTcells_MAIT
Abhd8	9.48455e-44	1.56373	0.303	0.088	1.77247e-39	gdTcells_MAIT
Phf6	1.37535e-43	1.51432	0.521	0.235	2.57025e-39	gdTcells_MAIT
Kcnn4	1.51159e-43	1.77661	0.382	0.135	2.82485e-39	gdTcells_MAIT
Tdrkh	2.04814e-43	1.28179	0.106	0.013	3.82757e-39	gdTcells_MAIT
Vps37b	2.09458e-43	1.06925	0.9	0.645	3.91436e-39	gdTcells_MAIT
Cpm	6.3718e-43	1.37515	0.27	0.069	1.19076e-38	gdTcells_MAIT
Nt5e	7.1334e-43	1.35152	0.309	0.088	1.33309e-38	gdTcells_MAIT
Sntb1	8.64984e-43	1.61255	0.191	0.039	1.61648e-38	gdTcells_MAIT
Cnnm2	9.77181e-43	1.67588	0.155	0.027	1.82616e-38	gdTcells_MAIT
Adgrl1	1.15348e-42	1.51968	0.206	0.045	2.15562e-38	gdTcells_MAIT
Slc7a8	5.94721e-42	2.08227	0.158	0.029	1.11141e-37	gdTcells_MAIT
Hilpda	1.45087e-41	2.09489	0.306	0.094	2.71138e-37	gdTcells_MAIT
Plod2	2.47904e-41	1.58322	0.136	0.022	4.63284e-37	gdTcells_MAIT
Pglyrp2	1.39267e-40	1.5351	0.276	0.077	2.60262e-36	gdTcells_MAIT
Mturn	3.24241e-40	1.51769	0.142	0.024	6.05942e-36	gdTcells_MAIT
Fkbp3	3.30007e-40	1.27414	0.694	0.415	6.16717e-36	gdTcells_MAIT
Acot7	9.10637e-40	1.52498	0.464	0.203	1.7018e-35	gdTcells_MAIT
Tesc	3.42812e-39	1.6218	0.224	0.055	6.40647e-35	gdTcells_MAIT
Mllt3	4.16277e-39	1.43898	0.442	0.179	7.77939e-35	gdTcells_MAIT
Spint2	4.78935e-39	1.32349	0.336	0.11	8.95034e-35	gdTcells_MAIT
Gpr65	1.2134e-38	1.43361	0.652	0.384	2.26761e-34	gdTcells_MAIT
Adam19	2.62159e-38	1.22757	0.412	0.153	4.89923e-34	gdTcells_MAIT
Syne1	7.03595e-38	1.66451	0.336	0.115	1.31488e-33	gdTcells_MAIT
Nr1d2	2.36654e-37	1.4787	0.212	0.052	4.42258e-33	gdTcells_MAIT
Pi4k2a	1.50447e-36	1.47838	0.427	0.184	2.81155e-32	gdTcells_MAIT
Fhl2	1.61321e-36	1.67231	0.197	0.047	3.01477e-32	gdTcells_MAIT
Cd200r1	1.72261e-36	2.00879	0.221	0.059	3.21922e-32	gdTcells_MAIT
Tnfsf14	2.922e-36	1.38259	0.179	0.039	5.46064e-32	gdTcells_MAIT
Rasgrp1	5.85717e-36	1.27621	0.518	0.25	1.09459e-31	gdTcells_MAIT
Ppp1r14b	8.77514e-36	1.3278	0.579	0.324	1.6399e-31	gdTcells_MAIT
Ppm1k	1.19312e-35	1.74454	0.273	0.085	2.2297e-31	gdTcells_MAIT
Kbtbd11	3.92917e-35	1.50393	0.391	0.155	7.34283e-31	gdTcells_MAIT
Selenot	1.55465e-34	1.15608	0.67	0.435	2.90534e-30	gdTcells_MAIT
Prdx6	1.7629e-34	1.00486	0.761	0.54	3.29451e-30	gdTcells_MAIT
Prkcz	2.265e-34	1.46425	0.182	0.042	4.23284e-30	gdTcells_MAIT
Akr1c13	2.98082e-34	1.5244	0.158	0.033	5.57055e-30	gdTcells_MAIT
Mrps5	3.03622e-34	1.47179	0.442	0.2	5.67409e-30	gdTcells_MAIT
Kcnk5	4.88044e-34	1.55577	0.13	0.024	9.12057e-30	gdTcells_MAIT
Plxdc2	5.10195e-34	1.69012	0.158	0.034	9.53453e-30	gdTcells_MAIT
Galm	7.95371e-34	1.46219	0.155	0.032	1.48639e-29	gdTcells_MAIT
Acpp	8.04573e-34	1.28679	0.136	0.025	1.50359e-29	gdTcells_MAIT
Srpk1	1.7953e-33	1.22405	0.609	0.354	3.35506e-29	gdTcells_MAIT
Capg	2.23526e-33	1.09934	0.67	0.387	4.17726e-29	gdTcells_MAIT
Slc38a1	2.80556e-33	1.10645	0.691	0.465	5.24304e-29	gdTcells_MAIT
Bzw2	6.66979e-33	1.41073	0.448	0.207	1.24645e-28	gdTcells_MAIT
Ptgir	7.12079e-33	2.08082	0.215	0.061	1.33073e-28	gdTcells_MAIT
Ttc28	8.66341e-33	1.60492	0.185	0.045	1.61902e-28	gdTcells_MAIT
Tnfrsf18	1.04891e-32	1.54817	0.403	0.171	1.96021e-28	gdTcells_MAIT
Cbarp	1.15812e-32	1.46827	0.152	0.032	2.1643e-28	gdTcells_MAIT
Ldlrad4	1.4679e-32	1.48101	0.233	0.068	2.74321e-28	gdTcells_MAIT
Grap2	3.98522e-32	1.05375	0.494	0.229	7.44758e-28	gdTcells_MAIT
Tasp1	4.07053e-32	1.5141	0.158	0.035	7.607e-28	gdTcells_MAIT
Trbc1	4.58043e-32	1.2326	0.509	0.234	8.5599e-28	gdTcells_MAIT
Ppp1cc	5.16524e-32	1.00533	0.752	0.529	9.6528e-28	gdTcells_MAIT
Slc25a23	5.31446e-32	1.36518	0.115	0.02	9.93166e-28	gdTcells_MAIT
Clint1	1.02458e-31	1.06647	0.73	0.573	1.91474e-27	gdTcells_MAIT
Zcchc10	2.64582e-31	1.7687	0.373	0.16	4.94451e-27	gdTcells_MAIT
Senp6	2.77706e-31	1.12052	0.655	0.424	5.18977e-27	gdTcells_MAIT
Prxl2a	4.15058e-31	1.40039	0.136	0.028	7.7566e-27	gdTcells_MAIT
P2ry10	5.92181e-31	1.01056	0.618	0.336	1.10667e-26	gdTcells_MAIT
Dpy19l3	7.47961e-31	1.35085	0.152	0.033	1.39779e-26	gdTcells_MAIT
Tspan32	8.13312e-31	1.45086	0.418	0.189	1.51992e-26	gdTcells_MAIT
Gbp6	2.65419e-30	1.98482	0.227	0.069	4.96015e-26	gdTcells_MAIT
Psen2	3.0917e-30	1.35362	0.458	0.226	5.77776e-26	gdTcells_MAIT
Rcc2	3.83556e-30	1.25943	0.53	0.29	7.16789e-26	gdTcells_MAIT
Hivep2	5.64247e-30	1.15704	0.624	0.375	1.05447e-25	gdTcells_MAIT
Tmem154	1.04102e-29	1.18207	0.406	0.172	1.94545e-25	gdTcells_MAIT
Tnfaip8	1.50475e-29	1.17445	0.697	0.497	2.81208e-25	gdTcells_MAIT
Myo1e	2.1378e-29	1.1868	0.318	0.116	3.99513e-25	gdTcells_MAIT
Pgm2l1	4.60243e-29	1.50157	0.267	0.092	8.60101e-25	gdTcells_MAIT
Crem	4.88335e-29	1.42922	0.43	0.202	9.126e-25	gdTcells_MAIT
Plec	5.39394e-29	1.19249	0.652	0.427	1.00802e-24	gdTcells_MAIT
Atxn1	6.00894e-29	1.39739	0.348	0.142	1.12295e-24	gdTcells_MAIT
Tob2	6.73608e-29	1.36524	0.618	0.414	1.25884e-24	gdTcells_MAIT
Zdhhc2	1.22935e-28	1.60681	0.158	0.038	2.2974e-24	gdTcells_MAIT
St3gal6	1.75231e-28	1.21456	0.391	0.166	3.27471e-24	gdTcells_MAIT
Fosb	2.65123e-28	1.29318	0.727	0.512	4.95462e-24	gdTcells_MAIT
Mppe1	2.70191e-28	1.35502	0.376	0.167	5.04932e-24	gdTcells_MAIT
Rgs2	2.98479e-28	1.11569	0.867	0.728	5.57798e-24	gdTcells_MAIT
Avpi1	3.52881e-28	1.41396	0.288	0.106	6.59463e-24	gdTcells_MAIT
Plcg1	4.03506e-28	1.30396	0.233	0.074	7.54072e-24	gdTcells_MAIT
Nlrc3	5.63828e-28	1.33656	0.288	0.104	1.05368e-23	gdTcells_MAIT
Tnk2	8.83286e-28	1.32511	0.23	0.072	1.65068e-23	gdTcells_MAIT
[truncated: 4,590 more rows]

## Sheet: scRNAseq_DCs_Markers
Clusters identified by Louvain algorithm using res.0.2
Marker Gene	p-value	average_log2FC	pct_in_cluster	pct_in_othercells	FDR	Cluster
Cd209a	3.53483e-27	3.51085	0.267	0.038	6.57126e-23	C0_cDC2
Mgl2	1.83976e-12	2.71243	0.226	0.081	3.42012e-08	C0_cDC2
Clec10a	1.69748e-18	2.30511	0.228	0.05	3.15561e-14	C0_cDC2
Ltb	3.00649e-35	2.01978	0.556	0.215	5.58907e-31	C0_cDC2
Wfdc17	5.65257e-38	1.95576	0.638	0.287	1.05081e-33	C0_cDC2
Cd7	7.86654e-29	1.868	0.455	0.149	1.46239e-24	C0_cDC2
Mmp12	4.99732e-08	1.85702	0.105	0.024	0.000929003	C0_cDC2
Clec4a1	2.50697e-15	1.83271	0.265	0.092	4.66045e-11	C0_cDC2
Cybb	9.00469e-63	1.76966	0.825	0.372	1.67397e-58	C0_cDC2
Dab2	3.57231e-15	1.76714	0.21	0.052	6.64093e-11	C0_cDC2
Ms4a4c	7.28563e-37	1.71161	0.611	0.258	1.3544e-32	C0_cDC2
Ifitm3	8.99685e-59	1.68906	0.926	0.663	1.67251e-54	C0_cDC2
Clec4a2	5.7849e-20	1.68286	0.272	0.067	1.07541e-15	C0_cDC2
Klrd1	8.8574e-40	1.6822	0.737	0.394	1.64659e-35	C0_cDC2
Irf4	1.31932e-38	1.67754	0.549	0.171	2.45263e-34	C0_cDC2
Smim5	8.17074e-17	1.63098	0.216	0.05	1.51894e-12	C0_cDC2
Acp5	2.3547e-19	1.62404	0.313	0.097	4.37738e-15	C0_cDC2
Clec4a3	3.79476e-14	1.6011	0.214	0.061	7.05446e-10	C0_cDC2
Rasgef1b	5.43509e-22	1.57623	0.471	0.215	1.01038e-17	C0_cDC2
Il1r2	2.96853e-25	1.55924	0.465	0.187	5.51849e-21	C0_cDC2
Cd300c2	2.96782e-27	1.55885	0.523	0.235	5.51718e-23	C0_cDC2
Clec4n	9.02186e-08	1.50927	0.167	0.066	0.00167716	C0_cDC2
Ctnnd2	1.54272e-18	1.50028	0.37	0.154	2.86791e-14	C0_cDC2
Tnip3	8.35053e-10	1.48447	0.424	0.263	1.55236e-05	C0_cDC2
Socs3	2.15778e-21	1.48376	0.498	0.244	4.01131e-17	C0_cDC2
Bcl11a	1.31683e-26	1.45308	0.636	0.367	2.44798e-22	C0_cDC2
I830077J02Rik	2.65077e-24	1.44474	0.504	0.24	4.92778e-20	C0_cDC2
Ifitm6	1.52869e-22	1.43545	0.525	0.26	2.84183e-18	C0_cDC2
S100a4	1.05639e-71	1.43466	0.975	0.599	1.96383e-67	C0_cDC2
Gm34680	8.40183e-09	1.43465	0.233	0.111	0.00015619	C0_cDC2
Ffar2	3.13642e-20	1.43005	0.346	0.112	5.83061e-16	C0_cDC2
Fgr	1.09477e-40	1.42372	0.665	0.282	2.03517e-36	C0_cDC2
Cd72	7.54629e-17	1.40816	0.288	0.093	1.40285e-12	C0_cDC2
Serpina3g	2.535e-10	1.39443	0.265	0.119	4.71256e-06	C0_cDC2
Cd300ld	3.07569e-14	1.37475	0.177	0.036	5.7177e-10	C0_cDC2
Siglece	1.17752e-10	1.37315	0.158	0.045	2.18901e-06	C0_cDC2
Cd33	4.01533e-18	1.36921	0.247	0.061	7.4645e-14	C0_cDC2
Ear2	6.58149e-08	1.36435	0.193	0.085	0.0012235	C0_cDC2
Sh2d1b1	4.87029e-17	1.35708	0.284	0.092	9.05387e-13	C0_cDC2
Csf1r	3.00155e-20	1.34901	0.403	0.171	5.57989e-16	C0_cDC2
Slamf9	5.49456e-11	1.34441	0.263	0.116	1.02144e-06	C0_cDC2
Ank	8.39538e-15	1.34409	0.294	0.116	1.5607e-10	C0_cDC2
Ddr1	1.39248e-13	1.34223	0.247	0.085	2.58862e-09	C0_cDC2
Prkcb	1.04177e-16	1.31333	0.414	0.201	1.93665e-12	C0_cDC2
Runx2	2.68499e-07	1.31187	0.259	0.142	0.00499139	C0_cDC2
Ms4a6b	3.22489e-23	1.29508	0.537	0.272	5.99507e-19	C0_cDC2
Rtp4	1.10764e-10	1.29474	0.171	0.05	2.0591e-06	C0_cDC2
Tagap	5.62977e-14	1.29339	0.391	0.206	1.04657e-09	C0_cDC2
Klrb1f	5.50411e-08	1.29151	0.115	0.031	0.00102321	C0_cDC2
Il1b	4.85442e-14	1.28837	0.638	0.495	9.02436e-10	C0_cDC2
Cd300a	1.64042e-32	1.28633	0.638	0.285	3.04954e-28	C0_cDC2
Ccr6	7.12505e-08	1.28382	0.148	0.052	0.00132455	C0_cDC2
Sirpa	9.62576e-34	1.27744	0.572	0.211	1.78943e-29	C0_cDC2
Gm15987	1.01446e-10	1.27504	0.3	0.151	1.88587e-06	C0_cDC2
Bex6	1.07975e-13	1.27461	0.315	0.135	2.00726e-09	C0_cDC2
Gm9733	3.52858e-12	1.27028	0.154	0.033	6.55963e-08	C0_cDC2
Clec4b1	1.11844e-08	1.26073	0.214	0.093	0.000207917	C0_cDC2
Itgam	9.31696e-26	1.25086	0.459	0.171	1.73202e-21	C0_cDC2
Ddx58	2.27589e-14	1.24787	0.195	0.047	4.23089e-10	C0_cDC2
Fcor	1.82435e-10	1.24226	0.175	0.055	3.39147e-06	C0_cDC2
Cd300lf	9.6189e-17	1.23639	0.3	0.104	1.78815e-12	C0_cDC2
Fcer1g	9.27232e-66	1.23603	0.977	0.798	1.72372e-61	C0_cDC2
H2-DMb2	1.04667e-23	1.2231	0.646	0.415	1.94576e-19	C0_cDC2
Atf3	9.19509e-21	1.21799	0.759	0.561	1.70937e-16	C0_cDC2
1600010M07Rik	2.93681e-11	1.2121	0.23	0.088	5.45952e-07	C0_cDC2
Ppp1r14a	8.82042e-08	1.21131	0.276	0.156	0.00163972	C0_cDC2
Ms4a6d	9.75548e-13	1.20401	0.22	0.069	1.81354e-08	C0_cDC2
Cfp	3.89636e-23	1.20401	0.66	0.443	7.24334e-19	C0_cDC2
Mdh2	3.90896e-25	1.20319	0.813	0.645	7.26676e-21	C0_cDC2
Ms4a6c	1.69048e-40	1.2021	0.862	0.528	3.14261e-36	C0_cDC2
Sirpb1a	2.09427e-09	1.19803	0.105	0.019	3.89325e-05	C0_cDC2
Lifr	1.49141e-12	1.19734	0.222	0.073	2.77254e-08	C0_cDC2
B4galt6	1.23224e-12	1.17782	0.309	0.138	2.29073e-08	C0_cDC2
Ticam2	2.85146e-11	1.16856	0.198	0.064	5.30087e-07	C0_cDC2
Ifitm2	1.01028e-28	1.16839	0.854	0.657	1.87812e-24	C0_cDC2
Cyp4f16	1.30894e-14	1.16496	0.362	0.17	2.43332e-10	C0_cDC2
1700019L13Rik	1.80981e-08	1.16022	0.144	0.047	0.000336443	C0_cDC2
Gm5547	2.23974e-12	1.15725	0.158	0.035	4.16368e-08	C0_cDC2
Susd3	5.87414e-11	1.14051	0.333	0.182	1.092e-06	C0_cDC2
Ctsa	1.00507e-37	1.13977	0.757	0.401	1.86843e-33	C0_cDC2
Gpr35	4.29835e-14	1.13559	0.438	0.256	7.99062e-10	C0_cDC2
Limd2	1.17894e-34	1.12285	0.833	0.581	2.19165e-30	C0_cDC2
Tlr2	5.29437e-12	1.11978	0.278	0.119	9.84223e-08	C0_cDC2
Sulf2	5.4258e-15	1.11896	0.374	0.168	1.00866e-10	C0_cDC2
Ndst1	1.36143e-13	1.1108	0.243	0.083	2.5309e-09	C0_cDC2
Bach1	5.36698e-20	1.1081	0.566	0.337	9.97722e-16	C0_cDC2
Kmo	2.68035e-20	1.10528	0.582	0.344	4.98278e-16	C0_cDC2
Oas1a	3.77207e-10	1.09654	0.214	0.083	7.01229e-06	C0_cDC2
Elmsan1	1.13444e-12	1.09486	0.409	0.232	2.10893e-08	C0_cDC2
Ifi27l2a	2.10243e-17	1.09402	0.786	0.609	3.90841e-13	C0_cDC2
Creb5	4.5556e-10	1.09373	0.187	0.062	8.46886e-06	C0_cDC2
Spns3	1.57932e-09	1.08762	0.247	0.112	2.93595e-05	C0_cDC2
Tgm2	7.85035e-15	1.08518	0.333	0.14	1.45938e-10	C0_cDC2
Nr4a1	7.39181e-27	1.07111	0.864	0.701	1.37414e-22	C0_cDC2
Spib	1.89057e-09	1.06554	0.206	0.08	3.51457e-05	C0_cDC2
Mef2c	1.19689e-17	1.06504	0.778	0.585	2.22501e-13	C0_cDC2
H2-Oa	2.16849e-19	1.05237	0.628	0.407	4.03123e-15	C0_cDC2
Napsa	4.26617e-50	1.04649	0.967	0.791	7.93081e-46	C0_cDC2
Tbc1d16	6.31567e-08	1.04472	0.177	0.073	0.00117408	C0_cDC2
Nfkb1	4.45128e-25	1.04074	0.868	0.749	8.27492e-21	C0_cDC2
Tfeb	7.17651e-08	1.03542	0.276	0.157	0.00133411	C0_cDC2
Gpr18	2.35708e-08	1.03001	0.274	0.147	0.000438182	C0_cDC2
Pou2f2	5.8961e-23	1.02944	0.665	0.419	1.09608e-18	C0_cDC2
Isg20	3.71225e-09	1.02392	0.2	0.078	6.90107e-05	C0_cDC2
Ccr1	5.70006e-15	1.01487	0.307	0.112	1.05964e-10	C0_cDC2
Siglecg	3.97015e-17	1.00361	0.486	0.26	7.3805e-13	C0_cDC2
Xcr1	7.2791e-68	2.9823	0.621	0.088	1.35318e-63	C1_cDC1a
Tlr3	3.12968e-62	2.71871	0.633	0.109	5.81808e-58	C1_cDC1a
Rab7b	1.8107e-89	2.59948	0.91	0.188	3.36608e-85	C1_cDC1a
Sept3	6.87994e-45	2.578	0.582	0.138	1.27898e-40	C1_cDC1a
Ppt1	7.24923e-73	2.55008	0.977	0.52	1.34763e-68	C1_cDC1a
Cadm1	2.27363e-39	2.52693	0.412	0.065	4.22668e-35	C1_cDC1a
Clec9a	1.88219e-71	2.49505	0.847	0.2	3.499e-67	C1_cDC1a
Itgae	2.41337e-17	2.41865	0.322	0.1	4.48646e-13	C1_cDC1a
Gcsam	4.74745e-42	2.38397	0.418	0.061	8.8255e-38	C1_cDC1a
Naaa	1.19963e-62	2.37361	0.938	0.417	2.23012e-58	C1_cDC1a
Irf8	2.76977e-74	2.22394	0.994	0.459	5.149e-70	C1_cDC1a
Gpr141b	1.66332e-32	2.21687	0.345	0.054	3.09212e-28	C1_cDC1a
Cd207	2.06806e-24	2.0826	0.141	0.005	3.84452e-20	C1_cDC1a
Cldn1	3.10834e-12	2.04831	0.282	0.101	5.7784e-08	C1_cDC1a
Gm43914	1.9176e-36	2.04728	0.401	0.067	3.56482e-32	C1_cDC1a
Pdia5	5.34876e-35	2.03272	0.446	0.095	9.94334e-31	C1_cDC1a
Fcrla	3.67441e-16	2.01746	0.169	0.026	6.83074e-12	C1_cDC1a
Gm36723	3.12552e-26	1.99774	0.407	0.1	5.81035e-22	C1_cDC1a
P2ry14	3.60117e-36	1.97342	0.508	0.121	6.69458e-32	C1_cDC1a
Mpeg1	5.89712e-67	1.95083	0.994	0.564	1.09627e-62	C1_cDC1a
Hepacam2	1.42451e-25	1.86935	0.503	0.162	2.64817e-21	C1_cDC1a
Snx22	2.05779e-26	1.83187	0.367	0.078	3.82543e-22	C1_cDC1a
Dbn1	1.20671e-20	1.82326	0.356	0.099	2.24328e-16	C1_cDC1a
Sult1a1	5.97676e-21	1.7609	0.226	0.035	1.11108e-16	C1_cDC1a
Ifi205	1.78278e-54	1.75768	0.853	0.248	3.31418e-50	C1_cDC1a
Gm38410	3.71539e-20	1.721	0.153	0.012	6.90691e-16	C1_cDC1a
Igf2r	4.94262e-16	1.71565	0.186	0.032	9.18833e-12	C1_cDC1a
Rtl8b	5.19537e-23	1.68995	0.412	0.115	9.65819e-19	C1_cDC1a
Arsb	4.66322e-25	1.68433	0.548	0.204	8.66892e-21	C1_cDC1a
Plpp1	1.68546e-27	1.67803	0.345	0.067	3.13328e-23	C1_cDC1a
Mctp1	3.1321e-20	1.66703	0.48	0.176	5.82258e-16	C1_cDC1a
BC028528	1.58813e-45	1.66551	0.836	0.307	2.95234e-41	C1_cDC1a
Cxcr3	5.47708e-18	1.61442	0.232	0.045	1.01819e-13	C1_cDC1a
Met	7.58717e-14	1.60651	0.226	0.059	1.41045e-09	C1_cDC1a
Klrb1b	4.349e-10	1.60022	0.356	0.17	8.08478e-06	C1_cDC1a
Trim35	1.58083e-27	1.57607	0.785	0.443	2.93877e-23	C1_cDC1a
Xlr	9.72803e-09	1.57146	0.249	0.1	0.000180844	C1_cDC1a
Pbx1	5.19288e-34	1.56732	0.61	0.185	9.65356e-30	C1_cDC1a
Cst3	4.64505e-62	1.56336	1	0.962	8.63515e-58	C1_cDC1a
Pcdh7	5.28534e-15	1.53239	0.107	0.008	9.82544e-11	C1_cDC1a
Txndc15	6.03208e-38	1.51553	0.819	0.38	1.12136e-33	C1_cDC1a
Pianp	6.07109e-21	1.51145	0.192	0.023	1.12862e-16	C1_cDC1a
Camk1d	8.74886e-38	1.50797	0.876	0.457	1.62641e-33	C1_cDC1a
Ifi211	5.84347e-39	1.50313	0.689	0.206	1.0863e-34	C1_cDC1a
2310040G24Rik	2.57707e-25	1.48468	0.469	0.141	4.79077e-21	C1_cDC1a
Wdfy4	5.8023e-37	1.42752	0.96	0.596	1.07865e-32	C1_cDC1a
Ccr2	2.89123e-30	1.41654	0.836	0.428	5.3748e-26	C1_cDC1a
Slco3a1	8.84437e-20	1.40401	0.52	0.214	1.64417e-15	C1_cDC1a
Fbxo4	1.44664e-18	1.40326	0.322	0.088	2.6893e-14	C1_cDC1a
Btla	3.4576e-21	1.39824	0.61	0.269	6.42768e-17	C1_cDC1a
Agpat3	2.08152e-20	1.38911	0.373	0.103	3.86954e-16	C1_cDC1a
Tlr12	3.82211e-14	1.38374	0.277	0.082	7.1053e-10	C1_cDC1a
Plin2	2.00805e-29	1.38082	0.74	0.329	3.73297e-25	C1_cDC1a
Cd36	4.41719e-44	1.37805	0.542	0.109	8.21155e-40	C1_cDC1a
Cenpv	3.12465e-16	1.35951	0.316	0.094	5.80872e-12	C1_cDC1a
Txndc16	6.67345e-12	1.35948	0.412	0.185	1.24059e-07	C1_cDC1a
Arhgap18	3.27032e-17	1.3533	0.644	0.362	6.07953e-13	C1_cDC1a
Rtl8a	2.75505e-15	1.35206	0.384	0.142	5.12164e-11	C1_cDC1a
Cd24a	1.04238e-40	1.33942	0.972	0.54	1.93778e-36	C1_cDC1a
Fzd1	3.0937e-17	1.33933	0.136	0.012	5.75118e-13	C1_cDC1a
Serpinb8	3.51703e-14	1.3179	0.192	0.039	6.53816e-10	C1_cDC1a
Plbd1	1.33651e-52	1.31718	0.994	0.718	2.48457e-48	C1_cDC1a
Cd226	3.15469e-18	1.31431	0.282	0.065	5.86457e-14	C1_cDC1a
Gatm	1.65902e-24	1.31329	0.621	0.25	3.08411e-20	C1_cDC1a
Naalad2	5.32756e-15	1.31101	0.107	0.008	9.90393e-11	C1_cDC1a
Gramd2	1.42519e-15	1.30462	0.119	0.01	2.64944e-11	C1_cDC1a
Clec1b	1.4295e-12	1.29224	0.215	0.055	2.65743e-08	C1_cDC1a
Zcchc4	3.91571e-10	1.29188	0.215	0.069	7.27931e-06	C1_cDC1a
Arhgap5	4.85814e-24	1.29098	0.814	0.443	9.03128e-20	C1_cDC1a
St3gal5	3.97376e-25	1.27863	0.785	0.399	7.38723e-21	C1_cDC1a
Gm35853	1.04405e-10	1.27396	0.158	0.036	1.94088e-06	C1_cDC1a
Naga	1.17468e-31	1.26908	0.859	0.476	2.18373e-27	C1_cDC1a
Sdad1	1.45492e-20	1.26652	0.644	0.312	2.7047e-16	C1_cDC1a
Clec1a	2.48219e-20	1.25443	0.305	0.071	4.61438e-16	C1_cDC1a
Rasgrp3	4.36054e-12	1.25366	0.316	0.12	8.10625e-08	C1_cDC1a
Prkra	1.73528e-15	1.25142	0.407	0.152	3.22588e-11	C1_cDC1a
Fanca	1.0466e-09	1.25123	0.237	0.087	1.94564e-05	C1_cDC1a
Plcb4	2.93654e-13	1.24685	0.26	0.079	5.45903e-09	C1_cDC1a
Fgd6	1.65661e-15	1.24155	0.192	0.036	3.07964e-11	C1_cDC1a
Rab32	7.38696e-23	1.23081	0.695	0.337	1.37324e-18	C1_cDC1a
Cd99l2	9.06954e-12	1.21979	0.147	0.028	1.68603e-07	C1_cDC1a
Slc8b1	5.70179e-17	1.19768	0.559	0.259	1.05996e-12	C1_cDC1a
Acvrl1	3.17978e-28	1.19062	0.627	0.236	5.9112e-24	C1_cDC1a
Lsr	3.48652e-13	1.18961	0.39	0.161	6.48143e-09	C1_cDC1a
Myo9a	1.0322e-17	1.18846	0.571	0.265	1.91886e-13	C1_cDC1a
Tnni2	3.12007e-25	1.1771	0.842	0.488	5.8002e-21	C1_cDC1a
Lmo1	6.36362e-19	1.1764	0.576	0.254	1.183e-14	C1_cDC1a
Slc25a20	1.30158e-13	1.17304	0.525	0.262	2.41963e-09	C1_cDC1a
Psap	3.26562e-47	1.17205	0.994	0.894	6.07079e-43	C1_cDC1a
Kif5a	6.40878e-12	1.16793	0.198	0.05	1.19139e-07	C1_cDC1a
Rhobtb1	7.28601e-12	1.16731	0.153	0.029	1.35447e-07	C1_cDC1a
Tssc4	5.75149e-10	1.154	0.384	0.185	1.0692e-05	C1_cDC1a
4930455G09Rik	9.68328e-09	1.14563	0.141	0.036	0.000180012	C1_cDC1a
Rnf144b	1.62168e-12	1.14223	0.316	0.11	3.0147e-08	C1_cDC1a
Ccser1	1.88255e-12	1.13412	0.141	0.024	3.49966e-08	C1_cDC1a
Zdhhc23	5.14864e-12	1.13114	0.328	0.124	9.57133e-08	C1_cDC1a
Ffar4	1.87984e-15	1.12492	0.407	0.148	3.49463e-11	C1_cDC1a
Pmepa1	2.566e-13	1.1064	0.52	0.25	4.77018e-09	C1_cDC1a
Fuca1	1.01607e-22	1.10521	0.831	0.548	1.88887e-18	C1_cDC1a
Ctnnbip1	1.19054e-13	1.10505	0.475	0.225	2.21321e-09	C1_cDC1a
Ubash3b	1.45673e-09	1.09887	0.542	0.327	2.70805e-05	C1_cDC1a
Fam149a	6.92176e-12	1.09404	0.186	0.045	1.28675e-07	C1_cDC1a
Cyb5r1	1.09249e-08	1.09394	0.266	0.109	0.000203095	C1_cDC1a
Arl6	2.73924e-09	1.09057	0.215	0.074	5.09225e-05	C1_cDC1a
Fgd2	2.53794e-23	1.08992	0.853	0.513	4.71803e-19	C1_cDC1a
Shtn1	9.15332e-23	1.08857	0.859	0.56	1.7016e-18	C1_cDC1a
Sept6	1.24435e-21	1.08712	0.791	0.446	2.31325e-17	C1_cDC1a
Cfh	1.55636e-08	1.07737	0.333	0.152	0.000289328	C1_cDC1a
Pi4k2a	3.81412e-13	1.07185	0.582	0.326	7.09044e-09	C1_cDC1a
Arap1	3.25232e-12	1.07014	0.446	0.213	6.04606e-08	C1_cDC1a
Notch4	1.41935e-09	1.0618	0.119	0.023	2.63857e-05	C1_cDC1a
Adam19	9.1175e-19	1.06082	0.514	0.195	1.69494e-14	C1_cDC1a
Mospd1	3.10593e-07	1.04655	0.226	0.095	0.00577392	C1_cDC1a
Dhrs9	3.07457e-08	1.04331	0.232	0.088	0.000571562	C1_cDC1a
Fnbp1	3.09864e-29	1.04271	0.949	0.644	5.76038e-25	C1_cDC1a
Cyb5a	4.07441e-27	1.03799	0.938	0.691	7.57434e-23	C1_cDC1a
Id2	6.119e-26	1.03752	0.966	0.622	1.13752e-21	C1_cDC1a
Pelo	6.88903e-11	1.03642	0.345	0.145	1.28067e-06	C1_cDC1a
Rab43	8.29597e-26	1.02564	0.91	0.671	1.54222e-21	C1_cDC1a
Clnk	4.1239e-08	1.01939	0.141	0.038	0.000766633	C1_cDC1a
Sgsm3	5.04027e-08	1.01884	0.192	0.068	0.000936987	C1_cDC1a
Pafah1b3	8.34388e-20	1.01806	0.746	0.392	1.55113e-15	C1_cDC1a
Unc119b	5.22621e-14	1.01409	0.531	0.253	9.71552e-10	C1_cDC1a
Plekho2	6.9083e-21	1.00173	0.876	0.616	1.28425e-16	C1_cDC1a
Sdf2l1	2.80104e-14	1.00032	0.785	0.51	5.20713e-10	C1_cDC1a
Hist1h1b	1.6781e-38	3.8859	0.493	0.092	3.11959e-34	C2_cDC1b
Pclaf	4.19098e-79	3.69804	0.725	0.099	7.79103e-75	C2_cDC1b
Hist1h2ap	2.01281e-28	3.67567	0.88	0.51	3.74182e-24	C2_cDC1b
Hist1h2ae	9.17294e-26	3.62351	0.662	0.262	1.70525e-21	C2_cDC1b
Rrm2	1.48123e-69	3.32848	0.479	0.03	2.75362e-65	C2_cDC1b
Top2a	3.43957e-49	3.32786	0.613	0.121	6.39415e-45	C2_cDC1b
Hist1h3b	2.41095e-49	3.26065	0.331	0.017	4.48196e-45	C2_cDC1b
Hist1h3c	5.97712e-39	3.18483	0.317	0.027	1.11115e-34	C2_cDC1b
Nusap1	4.82022e-37	2.74822	0.331	0.034	8.96079e-33	C2_cDC1b
Spc24	3.88013e-65	2.71142	0.655	0.093	7.21317e-61	C2_cDC1b
Esco2	9.39613e-49	2.70802	0.289	0.01	1.74674e-44	C2_cDC1b
Birc5	8.65444e-43	2.66533	0.479	0.073	1.60886e-38	C2_cDC1b
Clspn	4.01532e-67	2.6477	0.472	0.029	7.46448e-63	C2_cDC1b
Mki67	6.96057e-48	2.59656	0.704	0.176	1.29397e-43	C2_cDC1b
Ccne2	1.58189e-60	2.53025	0.43	0.027	2.94074e-56	C2_cDC1b
Lig1	5.04661e-60	2.52618	0.803	0.19	9.38165e-56	C2_cDC1b
Ccna2	5.02827e-40	2.52084	0.345	0.033	9.34756e-36	C2_cDC1b
Stmn1	2.15123e-65	2.49298	0.937	0.302	3.99913e-61	C2_cDC1b
Rad51ap1	4.20485e-57	2.47223	0.423	0.029	7.81681e-53	C2_cDC1b
Mcm7	7.80307e-58	2.45723	0.88	0.258	1.45059e-53	C2_cDC1b
Asf1b	3.87039e-54	2.39034	0.451	0.041	7.19505e-50	C2_cDC1b
Uhrf1	2.05883e-50	2.38896	0.606	0.107	3.82736e-46	C2_cDC1b
Pbk	4.57938e-50	2.33231	0.296	0.01	8.51306e-46	C2_cDC1b
Smc2	2.53391e-38	2.32313	0.592	0.148	4.71054e-34	C2_cDC1b
Hist1h1d	5.06244e-23	2.32058	0.444	0.12	9.41108e-19	C2_cDC1b
Dtl	6.0359e-50	2.30244	0.493	0.062	1.12207e-45	C2_cDC1b
Rad51	1.41995e-51	2.29815	0.366	0.023	2.63968e-47	C2_cDC1b
Hist1h2ab	1.37354e-33	2.29813	0.289	0.027	2.55342e-29	C2_cDC1b
Cdk1	2.08979e-48	2.27947	0.458	0.052	3.88491e-44	C2_cDC1b
Spc25	1.98102e-43	2.27673	0.366	0.034	3.68271e-39	C2_cDC1b
Atad2	1.14848e-41	2.25564	0.732	0.227	2.13502e-37	C2_cDC1b
Hells	5.57319e-49	2.25485	0.739	0.188	1.03606e-44	C2_cDC1b
Rrm1	4.41754e-52	2.25097	0.655	0.125	8.2122e-48	C2_cDC1b
Knl1	2.5469e-36	2.23326	0.387	0.053	4.73469e-32	C2_cDC1b
Brip1	3.20648e-42	2.18191	0.324	0.024	5.96085e-38	C2_cDC1b
Kif15	1.29941e-42	2.16701	0.401	0.044	2.41561e-38	C2_cDC1b
Cdc6	6.02396e-45	2.1535	0.338	0.024	1.11985e-40	C2_cDC1b
Cit	2.98741e-45	2.14194	0.359	0.028	5.55359e-41	C2_cDC1b
Hist1h2bb	6.96503e-21	2.14167	0.268	0.046	1.2948e-16	C2_cDC1b
Mcm5	7.23609e-56	2.11356	0.782	0.18	1.34519e-51	C2_cDC1b
Tyms	4.95522e-41	2.11329	0.535	0.101	9.21175e-37	C2_cDC1b
Gmnn	9.75396e-44	2.10339	0.662	0.164	1.81326e-39	C2_cDC1b
Pola1	2.12368e-40	2.10332	0.577	0.125	3.94793e-36	C2_cDC1b
Ncaph	4.55626e-36	2.09604	0.303	0.027	8.47009e-32	C2_cDC1b
Fbxo5	6.93162e-33	2.08053	0.289	0.028	1.28859e-28	C2_cDC1b
Cdca8	1.02685e-41	2.07121	0.521	0.09	1.90892e-37	C2_cDC1b
H2afx	4.62475e-31	2.04203	0.683	0.222	8.59741e-27	C2_cDC1b
Cenpm	4.81567e-48	2.03328	0.479	0.057	8.95232e-44	C2_cDC1b
Tcf19	2.3333e-46	2.03324	0.535	0.081	4.33761e-42	C2_cDC1b
Tacc3	4.31013e-45	2.00307	0.556	0.091	8.01254e-41	C2_cDC1b
Hist1h1a	8.18222e-32	2.00278	0.282	0.027	1.52108e-27	C2_cDC1b
Hist1h4d	6.38756e-13	1.99301	0.585	0.3	1.18745e-08	C2_cDC1b
Dut	3.29341e-48	1.97757	0.838	0.278	6.12245e-44	C2_cDC1b
Cdca7	6.99931e-49	1.97504	0.627	0.113	1.30117e-44	C2_cDC1b
Cks1b	6.86029e-50	1.97047	0.866	0.289	1.27533e-45	C2_cDC1b
Aurkb	3.94573e-34	1.96378	0.415	0.066	7.33511e-30	C2_cDC1b
Prc1	2.20889e-33	1.96008	0.338	0.041	4.10632e-29	C2_cDC1b
Cdca3	2.02182e-34	1.95682	0.423	0.068	3.75856e-30	C2_cDC1b
Ckap2l	1.18245e-35	1.95478	0.437	0.07	2.19818e-31	C2_cDC1b
Dhfr	1.6539e-36	1.94808	0.331	0.034	3.0746e-32	C2_cDC1b
Hist1h3e	3.44508e-19	1.93869	0.352	0.089	6.40441e-15	C2_cDC1b
Syce2	6.33701e-45	1.92123	0.606	0.117	1.17805e-40	C2_cDC1b
Neil3	9.3568e-30	1.91021	0.225	0.016	1.73943e-25	C2_cDC1b
Kif11	1.36059e-32	1.90918	0.31	0.034	2.52934e-28	C2_cDC1b
Mcm3	3.80641e-44	1.90848	0.782	0.236	7.07611e-40	C2_cDC1b
Cdc45	1.22881e-39	1.90514	0.331	0.028	2.28436e-35	C2_cDC1b
Tk1	1.12263e-38	1.90148	0.472	0.075	2.08697e-34	C2_cDC1b
Mcm6	5.89792e-43	1.89588	0.796	0.258	1.09642e-38	C2_cDC1b
Brca1	2.56165e-44	1.88463	0.331	0.023	4.7621e-40	C2_cDC1b
Hmgb2	5.98577e-42	1.87912	0.986	0.815	1.11276e-37	C2_cDC1b
Incenp	2.31407e-27	1.87801	0.387	0.076	4.30185e-23	C2_cDC1b
Ncapg2	2.85929e-37	1.87529	0.507	0.095	5.31543e-33	C2_cDC1b
Dnmt1	7.76921e-39	1.85858	0.775	0.277	1.4443e-34	C2_cDC1b
Hist1h3f	6.50739e-20	1.85848	0.338	0.078	1.20972e-15	C2_cDC1b
Ncapd2	1.36885e-46	1.85428	0.5	0.066	2.54468e-42	C2_cDC1b
Tpx2	7.29466e-29	1.84969	0.401	0.076	1.35608e-24	C2_cDC1b
Mcm10	5.31558e-49	1.8464	0.359	0.023	9.88166e-45	C2_cDC1b
Kif4	3.76321e-31	1.83891	0.268	0.025	6.9958e-27	C2_cDC1b
Hist1h2bj	9.28184e-27	1.82401	0.254	0.028	1.72549e-22	C2_cDC1b
Ncapg	1.40933e-36	1.82339	0.282	0.021	2.61994e-32	C2_cDC1b
Cenpe	3.84987e-34	1.8172	0.373	0.051	7.1569e-30	C2_cDC1b
Hist1h2br	3.33988e-23	1.81322	0.345	0.068	6.20884e-19	C2_cDC1b
Sgo1	9.76404e-34	1.81151	0.303	0.029	1.81514e-29	C2_cDC1b
Hist1h4h	4.81655e-18	1.80356	0.493	0.169	8.95396e-14	C2_cDC1b
Prim1	3.56274e-36	1.79937	0.465	0.08	6.62314e-32	C2_cDC1b
Cdt1	5.60477e-35	1.78754	0.458	0.079	1.04193e-30	C2_cDC1b
Shcbp1	1.14439e-32	1.78597	0.246	0.017	2.12742e-28	C2_cDC1b
Fen1	2.12239e-45	1.77704	0.606	0.112	3.94553e-41	C2_cDC1b
Mns1	6.67974e-26	1.76961	0.275	0.036	1.24176e-21	C2_cDC1b
Orc6	1.23083e-32	1.76885	0.577	0.15	2.2881e-28	C2_cDC1b
Bub1b	9.51527e-33	1.76518	0.345	0.044	1.76889e-28	C2_cDC1b
Ccdc34	2.20969e-29	1.76061	0.599	0.181	4.10781e-25	C2_cDC1b
Tuba1b	2.78021e-39	1.75757	0.979	0.743	5.16842e-35	C2_cDC1b
Cenps	9.50564e-42	1.75612	0.423	0.051	1.7671e-37	C2_cDC1b
Wdr76	7.29541e-32	1.75257	0.444	0.081	1.35622e-27	C2_cDC1b
Hirip3	5.15058e-32	1.74524	0.563	0.143	9.57492e-28	C2_cDC1b
Pkmyt1	1.00565e-34	1.74487	0.394	0.057	1.8695e-30	C2_cDC1b
Pcna	3.3247e-29	1.73804	0.824	0.432	6.18062e-25	C2_cDC1b
Hist1h2bm	1.56816e-29	1.73594	0.225	0.016	2.9152e-25	C2_cDC1b
Ccne1	3.05927e-35	1.73372	0.331	0.035	5.68718e-31	C2_cDC1b
Stil	5.05009e-38	1.72604	0.239	0.01	9.38813e-34	C2_cDC1b
Tipin	1.54923e-43	1.71822	0.676	0.151	2.88002e-39	C2_cDC1b
Txndc16	8.27616e-12	1.71669	0.451	0.188	1.53854e-07	C2_cDC1b
Cenpw	3.77447e-41	1.71355	0.641	0.143	7.01674e-37	C2_cDC1b
Ezh2	1.16296e-35	1.71317	0.817	0.342	2.16195e-31	C2_cDC1b
Dctpp1	2.72178e-41	1.70831	0.908	0.403	5.0598e-37	C2_cDC1b
Chaf1a	1.06417e-38	1.69888	0.486	0.08	1.97828e-34	C2_cDC1b
Rnf227	1.2484e-39	1.68971	0.359	0.035	2.32077e-35	C2_cDC1b
Ckap2	2.56682e-24	1.68016	0.268	0.037	4.77171e-20	C2_cDC1b
Hist2h2ac	5.81099e-19	1.67788	0.408	0.117	1.08026e-14	C2_cDC1b
Anln	1.51997e-24	1.66832	0.218	0.022	2.82562e-20	C2_cDC1b
Mybl2	2.49481e-35	1.66336	0.246	0.014	4.63786e-31	C2_cDC1b
Mad2l1	5.86805e-33	1.64811	0.408	0.066	1.09087e-28	C2_cDC1b
Racgap1	1.02044e-26	1.64601	0.563	0.164	1.897e-22	C2_cDC1b
Ccnf	3.47091e-24	1.64294	0.232	0.026	6.45243e-20	C2_cDC1b
Ccnb2	1.24406e-28	1.63788	0.437	0.088	2.31271e-24	C2_cDC1b
Rfc4	9.45866e-40	1.63302	0.57	0.11	1.75836e-35	C2_cDC1b
Mxd3	3.076e-35	1.62476	0.225	0.01	5.71828e-31	C2_cDC1b
E2f8	2.13039e-30	1.6213	0.394	0.066	3.9604e-26	C2_cDC1b
Pole	7.91247e-35	1.61692	0.317	0.031	1.47093e-30	C2_cDC1b
Rfc3	3.329e-27	1.61269	0.486	0.117	6.1886e-23	C2_cDC1b
Gins2	2.02042e-28	1.61237	0.387	0.068	3.75597e-24	C2_cDC1b
Cenph	8.00322e-27	1.61126	0.296	0.04	1.4878e-22	C2_cDC1b
Cep55	2.13143e-29	1.60932	0.275	0.028	3.96233e-25	C2_cDC1b
Cenpk	1.27002e-33	1.60579	0.359	0.046	2.36096e-29	C2_cDC1b
Topbp1	1.91342e-33	1.60485	0.725	0.239	3.55705e-29	C2_cDC1b
Kif22	3.70503e-17	1.59577	0.218	0.037	6.88766e-13	C2_cDC1b
Gatm	5.69367e-30	1.59064	0.725	0.248	1.05845e-25	C2_cDC1b
Mcm4	4.5761e-29	1.57304	0.627	0.19	8.50697e-25	C2_cDC1b
Nuf2	3.30785e-29	1.56739	0.218	0.015	6.14929e-25	C2_cDC1b
Kif14	6.1184e-24	1.55857	0.176	0.012	1.13741e-19	C2_cDC1b
Brca2	8.94575e-27	1.55644	0.261	0.029	1.66302e-22	C2_cDC1b
Rfc5	4.22713e-34	1.55602	0.493	0.092	7.85823e-30	C2_cDC1b
Dnajc9	1.91122e-36	1.54774	0.725	0.2	3.55296e-32	C2_cDC1b
Aspm	2.13639e-21	1.54204	0.204	0.023	3.97155e-17	C2_cDC1b
Melk	3.56388e-26	1.53957	0.232	0.023	6.62526e-22	C2_cDC1b
Mcm2	1.13326e-31	1.53889	0.549	0.128	2.10673e-27	C2_cDC1b
Cdca5	5.23057e-27	1.53784	0.197	0.013	9.72363e-23	C2_cDC1b
E2f1	2.1545e-28	1.53339	0.458	0.099	4.00522e-24	C2_cDC1b
Trip13	2.23015e-22	1.53133	0.268	0.041	4.14585e-18	C2_cDC1b
Ube2c	1.00381e-15	1.524	0.338	0.098	1.86609e-11	C2_cDC1b
Ercc6l	4.97929e-31	1.51859	0.359	0.051	9.2565e-27	C2_cDC1b
Hist1h1e	2.64232e-12	1.51767	0.641	0.345	4.91208e-08	C2_cDC1b
Mis18bp1	2.82547e-16	1.51731	0.218	0.039	5.25255e-12	C2_cDC1b
Tubb5	1.52387e-31	1.51532	0.986	0.793	2.83288e-27	C2_cDC1b
Iqgap3	1.80311e-26	1.49929	0.19	0.012	3.35198e-22	C2_cDC1b
Dnph1	5.50565e-30	1.49423	0.218	0.014	1.0235e-25	C2_cDC1b
Usp1	2.39104e-26	1.48729	0.676	0.249	4.44495e-22	C2_cDC1b
Hmgn2	3.45879e-32	1.48628	0.859	0.403	6.4299e-28	C2_cDC1b
Ranbp1	5.31278e-47	1.45848	0.993	0.677	9.87645e-43	C2_cDC1b
Ran	1.57808e-46	1.45402	0.965	0.74	2.93365e-42	C2_cDC1b
Dscc1	6.70577e-28	1.45263	0.246	0.024	1.2466e-23	C2_cDC1b
Plk4	3.30308e-24	1.45241	0.401	0.09	6.14043e-20	C2_cDC1b
AI506816	6.25562e-31	1.44544	0.655	0.191	1.16292e-26	C2_cDC1b
Kif20b	5.34843e-22	1.44197	0.289	0.05	9.94274e-18	C2_cDC1b
Diaph3	4.73001e-24	1.43827	0.366	0.074	8.79309e-20	C2_cDC1b
Cdc20	1.36831e-12	1.41954	0.183	0.036	2.54369e-08	C2_cDC1b
Rpa2	4.7356e-30	1.41799	0.5	0.107	8.80349e-26	C2_cDC1b
Hmmr	1.52704e-27	1.41482	0.261	0.027	2.83877e-23	C2_cDC1b
Cdkn3	1.32165e-21	1.4138	0.303	0.054	2.45694e-17	C2_cDC1b
Atad5	4.30361e-24	1.41018	0.338	0.062	8.00041e-20	C2_cDC1b
Phgdh	1.0613e-25	1.40773	0.479	0.113	1.97295e-21	C2_cDC1b
E2f7	3.75138e-33	1.39874	0.197	0.007	6.97382e-29	C2_cDC1b
Dek	5.96702e-42	1.39665	0.986	0.816	1.10927e-37	C2_cDC1b
Ska1	4.02326e-24	1.39194	0.197	0.016	7.47924e-20	C2_cDC1b
Nsd2	1.64746e-26	1.3902	0.718	0.281	3.06264e-22	C2_cDC1b
Dlgap5	2.32739e-25	1.38652	0.31	0.048	4.32661e-21	C2_cDC1b
Tubg1	4.94519e-24	1.3824	0.366	0.073	9.1931e-20	C2_cDC1b
Siva1	7.39222e-24	1.37986	0.782	0.372	1.37421e-19	C2_cDC1b
Psmc3ip	6.31624e-28	1.375	0.303	0.039	1.17419e-23	C2_cDC1b
Ppt1	1.61296e-22	1.37068	0.915	0.547	2.99849e-18	C2_cDC1b
Lmnb1	8.39879e-29	1.36933	0.866	0.387	1.56133e-24	C2_cDC1b
Alyref	1.4557e-33	1.36003	0.951	0.509	2.70615e-29	C2_cDC1b
Smc4	1.2595e-16	1.35604	0.718	0.379	2.34142e-12	C2_cDC1b
Kif23	4.60553e-16	1.35125	0.528	0.211	8.56168e-12	C2_cDC1b
Fignl1	5.34152e-29	1.35079	0.303	0.037	9.92989e-25	C2_cDC1b
Hist1h2bh	1.27458e-19	1.34978	0.197	0.024	2.36945e-15	C2_cDC1b
Bard1	8.2525e-24	1.34965	0.261	0.035	1.53414e-19	C2_cDC1b
Ncapd3	1.41387e-25	1.34679	0.5	0.127	2.62839e-21	C2_cDC1b
Suv39h1	4.41338e-26	1.34563	0.507	0.127	8.20447e-22	C2_cDC1b
Chek1	2.89318e-29	1.34397	0.254	0.023	5.37841e-25	C2_cDC1b
Cenpf	5.27204e-19	1.34033	0.282	0.055	9.80072e-15	C2_cDC1b
Chaf1b	8.36785e-24	1.33846	0.296	0.047	1.55558e-19	C2_cDC1b
Cip2a	3.58164e-21	1.33743	0.218	0.027	6.65828e-17	C2_cDC1b
Lsm2	3.02825e-24	1.3311	0.732	0.293	5.62952e-20	C2_cDC1b
Tmpo	7.776e-29	1.33076	0.951	0.55	1.44556e-24	C2_cDC1b
Ppat	1.0253e-21	1.33057	0.43	0.108	1.90603e-17	C2_cDC1b
Cenpp	8.44128e-23	1.33043	0.261	0.037	1.56923e-18	C2_cDC1b
Cdc7	1.88481e-22	1.32788	0.275	0.042	3.50386e-18	C2_cDC1b
Wdhd1	4.37911e-20	1.32095	0.317	0.065	8.14077e-16	C2_cDC1b
Pimreg	1.01526e-21	1.31952	0.183	0.016	1.88737e-17	C2_cDC1b
Nucks1	1.01604e-30	1.3194	0.93	0.539	1.88882e-26	C2_cDC1b
Ppa1	2.2449e-25	1.31797	0.732	0.28	4.17328e-21	C2_cDC1b
Ndc80	9.72837e-31	1.31671	0.317	0.039	1.8085e-26	C2_cDC1b
Zfp367	9.14042e-23	1.31521	0.338	0.064	1.6992e-18	C2_cDC1b
Gins1	3.66401e-24	1.31388	0.303	0.048	6.8114e-20	C2_cDC1b
Haus4	2.99606e-25	1.31261	0.373	0.07	5.56968e-21	C2_cDC1b
Cbx5	2.60204e-25	1.31053	0.697	0.262	4.83719e-21	C2_cDC1b
Dtymk	3.31397e-26	1.30935	0.676	0.229	6.16067e-22	C2_cDC1b
Rcc1	1.98837e-18	1.30847	0.345	0.085	3.69639e-14	C2_cDC1b
Kntc1	3.26735e-27	1.30443	0.204	0.014	6.074e-23	C2_cDC1b
Ung	5.99818e-21	1.30127	0.261	0.041	1.11506e-16	C2_cDC1b
Lockd	1.04632e-16	1.29814	0.275	0.059	1.94511e-12	C2_cDC1b
Nasp	6.34098e-30	1.29653	0.894	0.392	1.17879e-25	C2_cDC1b
Xcr1	2.71835e-17	1.29541	0.437	0.137	5.05342e-13	C2_cDC1b
Exo1	5.61649e-32	1.29303	0.225	0.013	1.04411e-27	C2_cDC1b
Nudc	4.27349e-34	1.2923	0.958	0.585	7.94442e-30	C2_cDC1b
Bub1	1.08443e-19	1.2852	0.197	0.024	2.01596e-15	C2_cDC1b
Cenpq	1.24259e-23	1.28444	0.437	0.104	2.30998e-19	C2_cDC1b
C1qbp	5.23543e-28	1.27891	0.901	0.487	9.73266e-24	C2_cDC1b
Knstrn	5.01024e-18	1.27591	0.387	0.102	9.31404e-14	C2_cDC1b
Tubb4b	5.73609e-20	1.27338	0.761	0.395	1.06634e-15	C2_cDC1b
Zmynd19	2.04509e-25	1.27291	0.465	0.108	3.80183e-21	C2_cDC1b
Rab7b	1.36557e-25	1.27069	0.704	0.247	2.53859e-21	C2_cDC1b
E2f3	4.4772e-25	1.26568	0.493	0.125	8.32311e-21	C2_cDC1b
Rad54l	8.91887e-19	1.26487	0.246	0.041	1.65802e-14	C2_cDC1b
Nmral1	9.67357e-19	1.26319	0.38	0.099	1.79832e-14	C2_cDC1b
Mms22l	4.74388e-23	1.25931	0.352	0.068	8.81888e-19	C2_cDC1b
Ptma	1.69686e-58	1.25594	1	0.98	3.15447e-54	C2_cDC1b
Tfdp1	4.64766e-25	1.25569	0.563	0.168	8.64001e-21	C2_cDC1b
Creld2	3.50242e-21	1.25543	0.655	0.257	6.511e-17	C2_cDC1b
Blm	1.3523e-20	1.25513	0.275	0.047	2.51393e-16	C2_cDC1b
Cenpn	1.61379e-22	1.24679	0.183	0.015	3.00003e-18	C2_cDC1b
Ube2s	2.12453e-20	1.24029	0.901	0.57	3.94949e-16	C2_cDC1b
Cenpa	6.69418e-13	1.24005	0.451	0.178	1.24445e-08	C2_cDC1b
Exosc8	4.39342e-29	1.23243	0.866	0.414	8.16736e-25	C2_cDC1b
Hist1h4a	2.5742e-14	1.22447	0.254	0.06	4.78544e-10	C2_cDC1b
Depdc1a	1.28119e-14	1.22364	0.155	0.021	2.38174e-10	C2_cDC1b
Mastl	4.94709e-24	1.21776	0.225	0.024	9.19663e-20	C2_cDC1b
Ska3	3.63714e-24	1.2173	0.183	0.013	6.76145e-20	C2_cDC1b
Psat1	3.54757e-21	1.21463	0.458	0.121	6.59494e-17	C2_cDC1b
Zwilch	3.30288e-18	1.21387	0.162	0.016	6.14006e-14	C2_cDC1b
Snrpd1	1.8014e-37	1.20712	0.979	0.684	3.3488e-33	C2_cDC1b
2001-01-01	2.65945e-13	1.20452	0.155	0.024	4.94393e-09	C2_cDC1b
Pa2g4	5.20032e-26	1.20417	0.93	0.521	9.6674e-22	C2_cDC1b
Arhgap11a	4.77505e-19	1.20166	0.514	0.169	8.87681e-15	C2_cDC1b
Hmgb1	2.16853e-32	1.20116	0.993	0.888	4.0313e-28	C2_cDC1b
Pold2	1.38767e-20	1.20076	0.401	0.1	2.57968e-16	C2_cDC1b
Lyar	6.57079e-23	1.19891	0.754	0.326	1.22151e-18	C2_cDC1b
Ifi205	4.83811e-20	1.19674	0.676	0.298	8.99404e-16	C2_cDC1b
Cdca2	1.33194e-18	1.19656	0.169	0.017	2.47607e-14	C2_cDC1b
Sdf2l1	3.2611e-26	1.19389	0.93	0.498	6.06238e-22	C2_cDC1b
Lin9	1.07135e-18	1.19358	0.31	0.066	1.99165e-14	C2_cDC1b
Hjurp	7.64273e-21	1.19261	0.535	0.17	1.42078e-16	C2_cDC1b
Pgp	2.73716e-26	1.19195	0.768	0.292	5.08838e-22	C2_cDC1b
Impdh2	5.21408e-26	1.18989	0.852	0.42	9.69298e-22	C2_cDC1b
Anp32b	1.04592e-42	1.18205	0.993	0.848	1.94437e-38	C2_cDC1b
Sgo2a	1.11756e-17	1.18165	0.176	0.021	2.07755e-13	C2_cDC1b
Timeless	8.7593e-20	1.17875	0.437	0.12	1.62835e-15	C2_cDC1b
Cdk4	1.5613e-19	1.17831	0.782	0.402	2.90245e-15	C2_cDC1b
Prdx4	1.36037e-18	1.17743	0.577	0.218	2.52893e-14	C2_cDC1b
Selenoh	2.65422e-24	1.17283	0.873	0.452	4.9342e-20	C2_cDC1b
Lrr1	2.29329e-26	1.1701	0.169	0.008	4.26322e-22	C2_cDC1b
Gng12	4.50728e-18	1.16994	0.535	0.195	8.37903e-14	C2_cDC1b
Gcat	2.22877e-17	1.168	0.338	0.082	4.14328e-13	C2_cDC1b
Hist1h4c	3.81492e-12	1.16284	0.254	0.068	7.09193e-08	C2_cDC1b
Rmi2	1.46317e-22	1.16121	0.239	0.03	2.72002e-18	C2_cDC1b
Ppih	2.95198e-18	1.15752	0.507	0.169	5.48774e-14	C2_cDC1b
Smco4	1.89716e-19	1.15741	0.331	0.072	3.52682e-15	C2_cDC1b
Mrpl42	6.41701e-25	1.15621	0.838	0.396	1.19292e-20	C2_cDC1b
Ddx39	1.18885e-20	1.15606	0.796	0.359	2.21008e-16	C2_cDC1b
Kif20a	3.22936e-15	1.15186	0.162	0.022	6.00338e-11	C2_cDC1b
Cgas	4.64516e-19	1.15023	0.43	0.12	8.63534e-15	C2_cDC1b
Prim2	8.18157e-18	1.14411	0.289	0.06	1.52095e-13	C2_cDC1b
Atpif1	5.59558e-37	1.14101	0.993	0.845	1.04022e-32	C2_cDC1b
Gemin6	1.10343e-19	1.13956	0.324	0.067	2.05128e-15	C2_cDC1b
Ube2t	7.788e-18	1.13948	0.268	0.052	1.44779e-13	C2_cDC1b
Hmgn1	1.34153e-27	1.13538	0.937	0.578	2.4939e-23	C2_cDC1b
Ndc1	3.46569e-15	1.13518	0.204	0.037	6.44272e-11	C2_cDC1b
Msh6	4.27164e-17	1.1325	0.373	0.1	7.94098e-13	C2_cDC1b
Slbp	6.71583e-25	1.13145	0.838	0.373	1.24847e-20	C2_cDC1b
Anp32e	6.9931e-26	1.12991	0.93	0.54	1.30002e-21	C2_cDC1b
Nme1	2.47882e-25	1.12945	0.93	0.614	4.60813e-21	C2_cDC1b
Pmf1	2.44148e-19	1.12725	0.514	0.167	4.5387e-15	C2_cDC1b
Ppil1	3.22793e-22	1.12397	0.486	0.129	6.00072e-18	C2_cDC1b
Irf8	3.62792e-19	1.12295	0.838	0.503	6.74431e-15	C2_cDC1b
Hist2h3b	1.65128e-13	1.12188	0.134	0.016	3.06973e-09	C2_cDC1b
Hist1h2ad	1.90287e-21	1.12132	0.19	0.018	3.53744e-17	C2_cDC1b
Ect2	9.59559e-12	1.12024	0.176	0.036	1.78382e-07	C2_cDC1b
2810408I11Rik	1.92121e-18	1.11861	0.183	0.022	3.57154e-14	C2_cDC1b
Rangap1	7.62523e-18	1.11849	0.577	0.222	1.41753e-13	C2_cDC1b
Kif18a	5.33185e-17	1.11793	0.225	0.038	9.91191e-13	C2_cDC1b
Rpa1	7.03081e-19	1.11773	0.549	0.188	1.30703e-14	C2_cDC1b
Slf1	2.70985e-20	1.11612	0.359	0.081	5.03761e-16	C2_cDC1b
Fanca	1.89605e-20	1.11463	0.352	0.075	3.52475e-16	C2_cDC1b
Ipo5	3.58438e-17	1.11291	0.563	0.21	6.66337e-13	C2_cDC1b
Traip	8.79845e-18	1.10693	0.134	0.01	1.63563e-13	C2_cDC1b
D030056L22Rik	6.28387e-19	1.10614	0.359	0.086	1.16817e-14	C2_cDC1b
Tex30	1.04841e-16	1.10608	0.401	0.117	1.94899e-12	C2_cDC1b
Gar1	1.18063e-17	1.10476	0.592	0.227	2.19479e-13	C2_cDC1b
Ttk	1.87043e-20	1.10377	0.183	0.018	3.47713e-16	C2_cDC1b
Rtl8b	2.24274e-11	1.10019	0.359	0.134	4.16925e-07	C2_cDC1b
Cenpi	4.61929e-21	1.09767	0.162	0.012	8.58726e-17	C2_cDC1b
Rfwd3	7.54898e-19	1.09491	0.472	0.143	1.40335e-14	C2_cDC1b
Pole2	7.69876e-19	1.08906	0.31	0.065	1.4312e-14	C2_cDC1b
Ctps	1.34095e-19	1.08592	0.289	0.054	2.49283e-15	C2_cDC1b
Jpt2	9.62236e-18	1.08559	0.507	0.169	1.7888e-13	C2_cDC1b
Ticrr	1.50313e-26	1.08509	0.176	0.009	2.79433e-22	C2_cDC1b
Mif	6.82548e-23	1.08493	0.93	0.665	1.26886e-18	C2_cDC1b
Paxip1	1.18824e-14	1.0848	0.317	0.085	2.20893e-10	C2_cDC1b
Umps	2.96103e-15	1.08275	0.373	0.112	5.50456e-11	C2_cDC1b
Haus1	2.4851e-19	1.08037	0.331	0.072	4.61979e-15	C2_cDC1b
Smyd2	1.28982e-18	1.07997	0.359	0.087	2.39777e-14	C2_cDC1b
Erh	1.10535e-23	1.07488	0.915	0.513	2.05485e-19	C2_cDC1b
Pfas	4.73938e-16	1.07177	0.218	0.038	8.81051e-12	C2_cDC1b
Cdca4	2.54729e-18	1.07104	0.465	0.14	4.73541e-14	C2_cDC1b
Csrp2	2.75326e-22	1.06799	0.359	0.073	5.11831e-18	C2_cDC1b
Hist1h2ak	2.08135e-19	1.06422	0.127	0.007	3.86924e-15	C2_cDC1b
Cad	1.22142e-13	1.06335	0.289	0.078	2.27062e-09	C2_cDC1b
Hist1h3a	6.40763e-20	1.05725	0.296	0.055	1.19118e-15	C2_cDC1b
Cdca7l	5.56335e-17	1.05634	0.394	0.11	1.03423e-12	C2_cDC1b
Nifk	2.21856e-19	1.05603	0.768	0.356	4.12431e-15	C2_cDC1b
Hdgf	4.24701e-22	1.05537	0.915	0.568	7.8952e-18	C2_cDC1b
Hnrnpab	5.88258e-29	1.0531	0.958	0.789	1.09357e-24	C2_cDC1b
Hmgb3	5.78456e-14	1.05213	0.254	0.06	1.07535e-09	C2_cDC1b
Sae1	3.94432e-19	1.05199	0.627	0.235	7.3325e-15	C2_cDC1b
Paics	4.3346e-21	1.05111	0.859	0.428	8.05801e-17	C2_cDC1b
Smc3	4.47475e-19	1.0496	0.852	0.474	8.31856e-15	C2_cDC1b
Hist1h2ai	2.01676e-17	1.04864	0.141	0.012	3.74915e-13	C2_cDC1b
Kif2c	4.13225e-12	1.04664	0.106	0.011	7.68185e-08	C2_cDC1b
Aurka	5.97255e-13	1.04174	0.218	0.048	1.1103e-08	C2_cDC1b
Rnaseh2b	9.23652e-20	1.03858	0.528	0.164	1.71707e-15	C2_cDC1b
Kifc1	2.43456e-15	1.03774	0.141	0.015	4.52585e-11	C2_cDC1b
Hist1h2af	8.46847e-19	1.03745	0.113	0.004	1.57429e-14	C2_cDC1b
Prmt1	3.6385e-22	1.03517	0.894	0.484	6.76397e-18	C2_cDC1b
Rbbp7	8.51436e-21	1.03003	0.873	0.507	1.58282e-16	C2_cDC1b
Nudcd2	2.67987e-15	1.02999	0.606	0.251	4.98188e-11	C2_cDC1b
Rif1	6.9839e-16	1.02423	0.62	0.267	1.29831e-11	C2_cDC1b
Pole3	9.70727e-17	1.02274	0.465	0.155	1.80458e-12	C2_cDC1b
Znhit3	3.67635e-18	1.02244	0.345	0.081	6.83433e-14	C2_cDC1b
Fkbp2	3.53569e-23	1.02212	0.915	0.482	6.57285e-19	C2_cDC1b
Timm50	5.63847e-20	1.01783	0.655	0.24	1.04819e-15	C2_cDC1b
Cenpu	9.33591e-17	1.01669	0.162	0.018	1.73555e-12	C2_cDC1b
Zgrf1	8.15483e-15	1.01602	0.183	0.029	1.51598e-10	C2_cDC1b
Rpa3	9.98785e-16	1.01525	0.423	0.132	1.85674e-11	C2_cDC1b
1190007I07Rik	4.46487e-16	1.01323	0.387	0.112	8.30019e-12	C2_cDC1b
Nek2	1.13617e-14	1.01087	0.134	0.014	2.11214e-10	C2_cDC1b
Pola2	4.79284e-19	1.00887	0.394	0.099	8.90989e-15	C2_cDC1b
Tlr3	9.67194e-12	1.00655	0.415	0.163	1.79801e-07	C2_cDC1b
Ppp1r14b	9.43761e-22	1.00504	0.915	0.53	1.75445e-17	C2_cDC1b
Enkd1	1.54972e-15	1.00252	0.211	0.037	2.88093e-11	C2_cDC1b
Cycs	3.03318e-27	1.00189	0.979	0.736	5.63869e-23	C2_cDC1b
Cisd1	7.20605e-16	1.00108	0.725	0.349	1.3396e-11	C2_cDC1b
H2afv	4.58435e-14	1.00013	0.859	0.546	8.52231e-10	C2_cDC1b
Fscn1	5.40175e-131	6.12428	0.88	0.053	1.00418e-126	C3_mregDC
Ccr7	1.00574e-126	5.96748	0.94	0.079	1.86966e-122	C3_mregDC
Cacnb3	4.08527e-180	5.89044	0.88	0.011	7.59452e-176	C3_mregDC
Il12b	1.44134e-63	5.82693	0.43	0.02	2.67944e-59	C3_mregDC
Apol7c	2.83505e-71	5.81387	0.36	0.004	5.27036e-67	C3_mregDC
Socs2	3.52318e-114	4.95328	0.85	0.065	6.54959e-110	C3_mregDC
Ccl22	5.20468e-69	4.68149	0.75	0.102	9.6755e-65	C3_mregDC
H2-M2	8.655e-60	4.63428	0.28	0.001	1.60896e-55	C3_mregDC
Nudt17	9.23553e-134	4.61294	0.66	0.007	1.71689e-129	C3_mregDC
Fabp5	2.4286e-42	4.48374	0.8	0.274	4.51476e-38	C3_mregDC
Anxa3	1.02454e-102	4.47717	0.88	0.092	1.90462e-98	C3_mregDC
Zmynd15	3.47112e-83	4.45262	0.67	0.053	6.45281e-79	C3_mregDC
Adcy6	5.76579e-120	4.43374	0.65	0.015	1.07186e-115	C3_mregDC
Ccl5	5.76489e-43	4.41232	0.91	0.459	1.07169e-38	C3_mregDC
Mreg	2.6924e-118	4.37972	0.7	0.023	5.00518e-114	C3_mregDC
Il4i1	3.51959e-95	4.35198	0.92	0.123	6.54292e-91	C3_mregDC
Mmp25	3.01182e-88	4.34555	0.71	0.059	5.59898e-84	C3_mregDC
Serpinb6b	2.48305e-79	4.32173	0.82	0.11	4.616e-75	C3_mregDC
Tmem123	1.29714e-57	4.04046	0.98	0.523	2.41138e-53	C3_mregDC
Tnfrsf4	2.11975e-75	3.97342	0.42	0.009	3.94062e-71	C3_mregDC
Serpinb9	2.4594e-65	3.9222	0.84	0.177	4.57203e-61	C3_mregDC
Relb	1.59641e-69	3.90489	0.97	0.314	2.96773e-65	C3_mregDC
Cd200	6.65513e-72	3.86236	0.74	0.095	1.23719e-67	C3_mregDC
Tspan3	3.18527e-51	3.85044	0.71	0.155	5.92141e-47	C3_mregDC
Tm4sf5	1.98593e-41	3.7966	0.33	0.022	3.69184e-37	C3_mregDC
Lad1	6.21065e-87	3.75855	0.44	0.005	1.15456e-82	C3_mregDC
Ramp3	9.25696e-47	3.74066	0.44	0.041	1.72087e-42	C3_mregDC
Aldh1a2	1.65711e-35	3.71494	0.36	0.038	3.08056e-31	C3_mregDC
Ly75	9.51701e-55	3.71135	0.69	0.12	1.76921e-50	C3_mregDC
Gm13546	2.8639e-73	3.65514	0.37	0.004	5.324e-69	C3_mregDC
Cd63	1.67086e-98	3.64575	0.83	0.07	3.10613e-94	C3_mregDC
Lima1	2.51362e-63	3.64255	0.71	0.1	4.67282e-59	C3_mregDC
Samsn1	2.39334e-59	3.64017	1	0.544	4.44922e-55	C3_mregDC
Pakap.1	4.93462e-80	3.58596	0.52	0.021	9.17346e-76	C3_mregDC
Ankrd33b	1.08873e-94	3.58185	0.51	0.009	2.02395e-90	C3_mregDC
Il2ra	6.52974e-65	3.57256	0.45	0.022	1.21388e-60	C3_mregDC
Stat4	6.02129e-50	3.57194	0.8	0.209	1.11936e-45	C3_mregDC
Slco5a1	2.6294e-93	3.54684	0.44	0.002	4.88805e-89	C3_mregDC
Fam177a	1.44227e-56	3.45619	0.89	0.303	2.68118e-52	C3_mregDC
Adora2a	5.05156e-84	3.3839	0.61	0.034	9.39085e-80	C3_mregDC
Scin	1.51616e-38	3.37629	0.26	0.011	2.81854e-34	C3_mregDC
Flrt3	4.64412e-47	3.35439	0.43	0.038	8.63343e-43	C3_mregDC
Strip2	4.45047e-69	3.35199	0.7	0.086	8.27342e-65	C3_mregDC
Fxyd2	1.56367e-45	3.32825	0.34	0.02	2.90686e-41	C3_mregDC
Bcl2l14	6.039e-40	3.27627	0.47	0.064	1.12265e-35	C3_mregDC
Poglut1	3.76996e-57	3.26602	0.78	0.168	7.00836e-53	C3_mregDC
Il15ra	1.98371e-49	3.26537	0.46	0.044	3.68772e-45	C3_mregDC
Slc4a8	5.02848e-35	3.25995	0.47	0.08	9.34795e-31	C3_mregDC
Tnfrsf9	2.06498e-64	3.23434	0.42	0.017	3.83879e-60	C3_mregDC
Tmcc3	1.01086e-60	3.2229	0.74	0.122	1.87919e-56	C3_mregDC
Ikzf4	1.13043e-44	3.19953	0.23	0.003	2.10147e-40	C3_mregDC
Synpo2	4.54649e-38	3.1766	0.2	0.003	8.45193e-34	C3_mregDC
H2-Eb2	3.96389e-41	3.13882	0.53	0.081	7.36887e-37	C3_mregDC
Tmem150c	5.3938e-63	3.13354	0.35	0.007	1.00271e-58	C3_mregDC
Eno3	4.59892e-49	3.10474	0.65	0.111	8.54939e-45	C3_mregDC
Laptm4b	1.60436e-21	3.10016	0.29	0.046	2.9825e-17	C3_mregDC
Tbc1d4	8.01278e-46	3.08434	0.96	0.543	1.48958e-41	C3_mregDC
Slc22a23	2.82126e-54	3.06091	0.35	0.013	5.24472e-50	C3_mregDC
Rasa2	8.94311e-24	3.00986	0.61	0.216	1.66252e-19	C3_mregDC
Gm47662	7.1455e-60	3.00718	0.3	0.003	1.32835e-55	C3_mregDC
Basp1	1.85688e-54	2.9677	0.97	0.462	3.45193e-50	C3_mregDC
Gnb4	2.00451e-28	2.96284	0.61	0.19	3.72639e-24	C3_mregDC
Tmem39a	1.16571e-43	2.95796	0.78	0.235	2.16706e-39	C3_mregDC
Cd274	5.99865e-65	2.93645	0.81	0.132	1.11515e-60	C3_mregDC
Adgrg6	1.67627e-47	2.90731	0.49	0.053	3.11619e-43	C3_mregDC
Arl5c	7.66674e-59	2.88845	0.85	0.194	1.42525e-54	C3_mregDC
Ktn1	1.63019e-37	2.88538	0.9	0.478	3.03053e-33	C3_mregDC
Cblb	2.38786e-52	2.86365	0.83	0.22	4.43903e-48	C3_mregDC
Mir155hg	9.83023e-46	2.85066	0.55	0.076	1.82744e-41	C3_mregDC
Birc2	3.27377e-42	2.84897	0.85	0.304	6.08594e-38	C3_mregDC
Cdkn2b	5.68543e-54	2.84687	0.3	0.006	1.05692e-49	C3_mregDC
Pdlim4	8.39312e-41	2.84272	0.31	0.019	1.56028e-36	C3_mregDC
Slc7a11	4.52201e-26	2.83005	0.3	0.037	8.40641e-22	C3_mregDC
Cxcl16	2.62232e-53	2.82829	0.95	0.37	4.8749e-49	C3_mregDC
Arc	1.24695e-59	2.80012	0.29	0.002	2.31808e-55	C3_mregDC
Castor2	8.26652e-49	2.79865	0.64	0.108	1.53675e-44	C3_mregDC
Etv3	1.04998e-53	2.79734	0.97	0.446	1.9519e-49	C3_mregDC
Tmtc2	2.01205e-44	2.77106	0.51	0.067	3.7404e-40	C3_mregDC
Spsb1	5.39666e-41	2.76558	0.4	0.039	1.00324e-36	C3_mregDC
Foxp4	4.30212e-56	2.7518	0.68	0.107	7.99765e-52	C3_mregDC
Cd40	2.77143e-38	2.74816	0.7	0.171	5.15209e-34	C3_mregDC
Uap1	6.98857e-27	2.72853	0.61	0.195	1.29918e-22	C3_mregDC
Nr4a3	3.46582e-33	2.70493	0.74	0.257	6.44297e-29	C3_mregDC
Pcgf5	2.94658e-42	2.6929	0.78	0.245	5.47769e-38	C3_mregDC
Epsti1	3.082e-23	2.69208	0.84	0.53	5.72943e-19	C3_mregDC
Zc3h12c	4.27314e-29	2.69158	0.41	0.07	7.94377e-25	C3_mregDC
Ndnf	1.64239e-30	2.68664	0.25	0.018	3.05321e-26	C3_mregDC
Marcksl1	5.43335e-48	2.64888	0.95	0.369	1.01006e-43	C3_mregDC
AW112010	7.08832e-18	2.61484	0.75	0.479	1.31772e-13	C3_mregDC
Gm10851	7.13258e-51	2.60401	0.24	0.001	1.32595e-46	C3_mregDC
Pfkfb3	3.39127e-28	2.60181	0.6	0.178	6.30437e-24	C3_mregDC
Cd1d1	8.43936e-14	2.60178	0.32	0.087	1.56888e-09	C3_mregDC
Plppr4	3.66261e-36	2.5952	0.23	0.008	6.80879e-32	C3_mregDC
Fas	2.77953e-32	2.59358	0.41	0.059	5.16714e-28	C3_mregDC
Sema6d	6.52845e-40	2.58956	0.38	0.034	1.21364e-35	C3_mregDC
Sema7a	8.98429e-36	2.54867	0.52	0.093	1.67018e-31	C3_mregDC
Ccser2	4.30129e-43	2.54713	0.62	0.117	7.9961e-39	C3_mregDC
Gadd45b	1.3075e-41	2.54511	0.89	0.349	2.43064e-37	C3_mregDC
Marcks	4.55642e-51	2.54464	1	0.715	8.47039e-47	C3_mregDC
Net1	1.45222e-20	2.53618	0.66	0.301	2.69967e-16	C3_mregDC
Atxn1	6.83875e-39	2.53606	0.34	0.026	1.27132e-34	C3_mregDC
Arhgap31	4.25726e-31	2.53378	0.77	0.334	7.91424e-27	C3_mregDC
Prnp	1.09864e-23	2.53289	0.38	0.073	2.04237e-19	C3_mregDC
Clic4	1.24982e-40	2.52999	0.95	0.602	2.32342e-36	C3_mregDC
Mical3	1.09407e-31	2.52133	0.41	0.06	2.03387e-27	C3_mregDC
2200002D01Rik	2.02227e-33	2.51879	0.35	0.038	3.7594e-29	C3_mregDC
Bmp2k	8.02529e-35	2.50231	0.89	0.498	1.4919e-30	C3_mregDC
Sepsecs	3.29389e-36	2.48746	0.55	0.109	6.12334e-32	C3_mregDC
Adam23	2.07828e-29	2.48743	0.57	0.14	3.86352e-25	C3_mregDC
Itgb8	1.04437e-35	2.48058	0.18	0.002	1.94148e-31	C3_mregDC
Papss2	1.75223e-41	2.47981	0.3	0.016	3.2574e-37	C3_mregDC
Snn	4.25091e-41	2.47094	0.45	0.05	7.90244e-37	C3_mregDC
Insl6	1.00807e-42	2.46325	0.29	0.012	1.874e-38	C3_mregDC
Rap2b	2.14614e-31	2.46152	0.75	0.293	3.98968e-27	C3_mregDC
Sinhcaf	4.19624e-35	2.45243	0.81	0.349	7.80081e-31	C3_mregDC
Tnfrsf11a	3.03267e-42	2.44899	0.54	0.081	5.63773e-38	C3_mregDC
Glipr2	6.60142e-32	2.44657	0.83	0.395	1.2272e-27	C3_mregDC
Nudt9	3.34113e-21	2.41608	0.57	0.206	6.21117e-17	C3_mregDC
Il7r	1.6137e-35	2.40712	0.63	0.14	2.99987e-31	C3_mregDC
Gucd1	1.18861e-38	2.40065	0.56	0.102	2.20963e-34	C3_mregDC
Gypc	5.48824e-33	2.39817	0.42	0.059	1.02026e-28	C3_mregDC
Swap70	2.56155e-34	2.39609	0.88	0.441	4.76192e-30	C3_mregDC
Fnbp1l	2.9949e-41	2.37421	0.69	0.155	5.56751e-37	C3_mregDC
Arhgef40	1.28559e-31	2.37133	0.65	0.187	2.38991e-27	C3_mregDC
Gclc	4.91645e-08	2.36402	0.29	0.111	0.000913967	C3_mregDC
Spred1	3.26452e-33	2.35592	0.69	0.214	6.06874e-29	C3_mregDC
Plxnc1	3.66413e-31	2.35163	0.79	0.315	6.81162e-27	C3_mregDC
Cd70	3.16108e-42	2.34812	0.2	0.001	5.87646e-38	C3_mregDC
Vsig10	1.46313e-48	2.34611	0.4	0.028	2.71996e-44	C3_mregDC
Hsf2	1.11232e-20	2.34527	0.4	0.096	2.0678e-16	C3_mregDC
Gbp5	5.43779e-41	2.34232	0.58	0.095	1.01089e-36	C3_mregDC
Ncoa7	7.83496e-16	2.34162	0.72	0.451	1.45652e-11	C3_mregDC
Gm2396	4.18485e-37	2.33407	0.3	0.02	7.77963e-33	C3_mregDC
Fgfbp3	7.89788e-18	2.33296	0.14	0.009	1.46822e-13	C3_mregDC
Nrp2	6.1873e-36	2.32772	0.38	0.041	1.15022e-31	C3_mregDC
Arhgap28	2.94101e-38	2.31385	0.29	0.017	5.46734e-34	C3_mregDC
Atp11a	1.9361e-29	2.31148	0.41	0.066	3.59921e-25	C3_mregDC
Arhgap22	1.08481e-16	2.31112	0.45	0.146	2.01667e-12	C3_mregDC
Stap2	8.96157e-59	2.30567	0.34	0.008	1.66596e-54	C3_mregDC
Cpne2	4.59621e-21	2.30211	0.65	0.269	8.54436e-17	C3_mregDC
Rftn1	2.38484e-39	2.2955	0.73	0.191	4.43342e-35	C3_mregDC
Rogdi	1.40159e-40	2.28763	0.93	0.422	2.60555e-36	C3_mregDC
Gm10432	6.80911e-38	2.28614	0.19	0.002	1.26581e-33	C3_mregDC
Bcl2a1a	3.72473e-39	2.27014	0.85	0.296	6.92428e-35	C3_mregDC
Il15	1.14054e-21	2.26345	0.25	0.031	2.12026e-17	C3_mregDC
Pdcd1lg2	3.39049e-26	2.25295	0.34	0.049	6.30292e-22	C3_mregDC
Tmem176a	8.48092e-35	2.2522	0.82	0.315	1.5766e-30	C3_mregDC
Jag1	1.23194e-28	2.24411	0.21	0.011	2.29018e-24	C3_mregDC
Slc33a1	1.69833e-09	2.24074	0.31	0.111	3.15719e-05	C3_mregDC
Bcl2a1b	8.17196e-46	2.23829	0.98	0.51	1.51917e-41	C3_mregDC
Cacna1s	5.47621e-19	2.22827	0.36	0.082	1.01803e-14	C3_mregDC
Iscu	3.90995e-37	2.2253	0.89	0.511	7.2686e-33	C3_mregDC
Aebp2	6.1577e-42	2.21901	0.93	0.485	1.14472e-37	C3_mregDC
Ssh1	2.93474e-28	2.21671	0.54	0.133	5.45568e-24	C3_mregDC
Arpin	3.74151e-35	2.20882	0.26	0.015	6.95547e-31	C3_mregDC
C9orf72	2.77448e-23	2.20633	0.57	0.182	5.15776e-19	C3_mregDC
Tmem19	6.33019e-26	2.20099	0.53	0.139	1.17678e-21	C3_mregDC
Nipal1	1.77622e-46	2.19979	0.28	0.008	3.302e-42	C3_mregDC
Gyg	3.05929e-19	2.19859	0.67	0.304	5.68721e-15	C3_mregDC
Traf1	6.42836e-44	2.1977	0.99	0.642	1.19503e-39	C3_mregDC
Rassf2	7.07923e-34	2.19561	0.76	0.271	1.31603e-29	C3_mregDC
Pla2g4f	2.13461e-29	2.18165	0.13	0	3.96823e-25	C3_mregDC
Gm37529	1.03252e-27	2.18095	0.24	0.019	1.91946e-23	C3_mregDC
Vwa5a	2.75733e-17	2.15586	0.62	0.275	5.12588e-13	C3_mregDC
Tpm1	8.97906e-29	2.15252	0.74	0.28	1.66921e-24	C3_mregDC
Cflar	1.98569e-33	2.15147	0.82	0.329	3.69139e-29	C3_mregDC
Extl1	5.36605e-40	2.14737	0.2	0.002	9.97548e-36	C3_mregDC
Arl5a	2.32625e-27	2.14392	0.75	0.314	4.32451e-23	C3_mregDC
Slc27a3	2.14003e-15	2.14176	0.18	0.023	3.97832e-11	C3_mregDC
Gca	9.08065e-30	2.12363	0.38	0.054	1.68809e-25	C3_mregDC
Mex3b	1.51144e-25	2.11962	0.29	0.035	2.80976e-21	C3_mregDC
Mllt6	9.53156e-32	2.11633	0.66	0.178	1.77192e-27	C3_mregDC
Rgs1	1.27757e-34	2.11564	0.87	0.348	2.375e-30	C3_mregDC
Tubb2b	2.02207e-10	2.10271	0.22	0.055	3.75902e-06	C3_mregDC
Tbc1d8	3.49294e-32	2.10009	0.84	0.356	6.49338e-28	C3_mregDC
Map4k4	2.54713e-27	2.09871	0.88	0.604	4.73512e-23	C3_mregDC
Sh3bp4	2.49774e-24	2.09298	0.34	0.055	4.64331e-20	C3_mregDC
Crispld2	3.79559e-16	2.08795	0.15	0.013	7.056e-12	C3_mregDC
Npr1	3.07942e-27	2.08642	0.18	0.007	5.72464e-23	C3_mregDC
Kcnk6	1.80596e-25	2.08267	0.55	0.156	3.35728e-21	C3_mregDC
Rassf3	4.61369e-29	2.07955	0.78	0.329	8.57686e-25	C3_mregDC
Rabgap1l	5.25602e-29	2.07833	0.77	0.283	9.77095e-25	C3_mregDC
Htra2	7.5502e-29	2.07691	0.7	0.253	1.40358e-24	C3_mregDC
Tmem176b	2.40758e-29	2.06665	0.82	0.378	4.47569e-25	C3_mregDC
Nlrc5	1.11257e-22	2.05798	0.6	0.201	2.06827e-18	C3_mregDC
Pcyt1a	5.3045e-13	2.05176	0.56	0.273	9.86106e-09	C3_mregDC
Nostrin	3.39793e-25	2.04765	0.64	0.226	6.31675e-21	C3_mregDC
Rab8b	5.36897e-28	2.04031	0.94	0.768	9.98092e-24	C3_mregDC
Rnf19b	1.15417e-27	2.03937	0.85	0.451	2.1456e-23	C3_mregDC
Mfhas1	3.10052e-23	2.03254	0.5	0.134	5.76388e-19	C3_mregDC
Dok1	1.7046e-25	2.01529	0.57	0.171	3.16885e-21	C3_mregDC
Peak1	1.94722e-27	2.00307	0.59	0.155	3.61988e-23	C3_mregDC
Adap1	1.1213e-32	2.00249	0.86	0.355	2.08449e-28	C3_mregDC
Col27a1	4.17495e-16	1.99855	0.24	0.041	7.76124e-12	C3_mregDC
Plekhm2	2.32781e-23	1.99577	0.53	0.151	4.3274e-19	C3_mregDC
Gpr157	4.35113e-15	1.99351	0.27	0.056	8.08876e-11	C3_mregDC
Dstn	6.86621e-18	1.98557	0.86	0.613	1.27643e-13	C3_mregDC
Mmp23	7.19378e-19	1.9803	0.17	0.015	1.33732e-14	C3_mregDC
Rel	2.93506e-30	1.97876	0.94	0.751	5.45627e-26	C3_mregDC
Fam49a	1.4358e-27	1.9759	0.85	0.383	2.66916e-23	C3_mregDC
Thap2	2.58031e-15	1.97388	0.47	0.167	4.7968e-11	C3_mregDC
Snhg15	6.3299e-27	1.97211	0.82	0.384	1.17673e-22	C3_mregDC
Tmem131l	3.44106e-24	1.97024	0.78	0.4	6.39693e-20	C3_mregDC
Palld	1.00983e-18	1.9679	0.45	0.129	1.87727e-14	C3_mregDC
Rnf152	1.19879e-20	1.96584	0.1	0.001	2.22855e-16	C3_mregDC
Serinc5	6.42512e-22	1.96228	0.26	0.032	1.19443e-17	C3_mregDC
Zfp36l1	5.86502e-32	1.95998	0.97	0.776	1.09031e-27	C3_mregDC
Rhoc	7.96306e-28	1.95868	0.41	0.07	1.48033e-23	C3_mregDC
Gbp2	3.49799e-29	1.94926	0.6	0.145	6.50276e-25	C3_mregDC
Nfe2l1	2.1699e-25	1.94861	0.82	0.489	4.03384e-21	C3_mregDC
Lrp8	7.83549e-12	1.94632	0.25	0.061	1.45662e-07	C3_mregDC
Bcl2a1d	2.30761e-30	1.94521	0.88	0.465	4.28984e-26	C3_mregDC
Dnajc12	8.50188e-19	1.91128	0.22	0.028	1.5805e-14	C3_mregDC
N4bp2l1	1.51045e-23	1.90552	0.63	0.202	2.80793e-19	C3_mregDC
Csrp1	4.10421e-16	1.89058	0.7	0.396	7.62973e-12	C3_mregDC
Pgap2	1.73874e-25	1.88782	0.7	0.276	3.23231e-21	C3_mregDC
Adam8	7.90147e-19	1.88287	0.73	0.4	1.46888e-14	C3_mregDC
Nfkb2	5.84443e-32	1.88216	0.88	0.455	1.08648e-27	C3_mregDC
Casp3	4.88889e-18	1.87799	0.7	0.383	9.08844e-14	C3_mregDC
Cd80	6.69264e-15	1.87334	0.56	0.234	1.24416e-10	C3_mregDC
Ccdc88a	1.71855e-28	1.86886	0.94	0.614	3.19478e-24	C3_mregDC
Phlpp1	1.35926e-22	1.86764	0.58	0.188	2.52687e-18	C3_mregDC
Cdc42ep3	4.31738e-17	1.86517	0.59	0.25	8.02602e-13	C3_mregDC
Rgmb	5.21835e-23	1.86398	0.27	0.033	9.70091e-19	C3_mregDC
Spint2	6.38942e-23	1.86338	0.77	0.367	1.18779e-18	C3_mregDC
Fam89a	5.94923e-22	1.85192	0.19	0.015	1.10596e-17	C3_mregDC
Zfc3h1	5.43314e-21	1.84355	0.62	0.228	1.01002e-16	C3_mregDC
Eno2	1.02167e-25	1.8403	0.15	0.004	1.89928e-21	C3_mregDC
Il18bp	2.29191e-15	1.83481	0.2	0.029	4.26067e-11	C3_mregDC
Tmem63b	1.2653e-23	1.83176	0.44	0.096	2.35219e-19	C3_mregDC
Ogfrl1	1.34761e-20	1.83146	0.78	0.516	2.50521e-16	C3_mregDC
E130311K13Rik	2.05692e-27	1.82787	0.24	0.019	3.82382e-23	C3_mregDC
Txndc17	2.08739e-15	1.82681	0.86	0.707	3.88046e-11	C3_mregDC
Sbf2	7.98645e-20	1.82526	0.36	0.076	1.48468e-15	C3_mregDC
Lrrk1	1.95222e-28	1.81867	0.88	0.492	3.62918e-24	C3_mregDC
Myo1g	1.72228e-31	1.80934	0.94	0.679	3.20173e-27	C3_mregDC
Gm10399	2.25588e-32	1.80865	0.19	0.005	4.19368e-28	C3_mregDC
H2-Q7	4.86151e-29	1.80549	0.94	0.654	9.03755e-25	C3_mregDC
Atmin	1.28804e-20	1.8047	0.47	0.13	2.39447e-16	C3_mregDC
Src	1.86784e-14	1.80384	0.22	0.038	3.47232e-10	C3_mregDC
Dscaml1	1.47292e-31	1.80374	0.14	0	2.73816e-27	C3_mregDC
Tcf7l1	3.72457e-19	1.80166	0.11	0.003	6.92397e-15	C3_mregDC
Tmem120b	2.18835e-18	1.80122	0.26	0.041	4.06813e-14	C3_mregDC
H2-Q6	3.09124e-23	1.7988	0.78	0.395	5.74661e-19	C3_mregDC
Gpr137b	2.9795e-11	1.79696	0.56	0.303	5.53888e-07	C3_mregDC
Stx11	9.67702e-16	1.79354	0.4	0.115	1.79896e-11	C3_mregDC
H2-Q4	1.19784e-17	1.78422	0.65	0.285	2.22678e-13	C3_mregDC
Tnfrsf1b	2.63964e-17	1.77908	0.56	0.213	4.90708e-13	C3_mregDC
Gtf2a1	4.63564e-17	1.7771	0.6	0.256	8.61766e-13	C3_mregDC
Ccl17	6.46345e-18	1.77682	0.52	0.152	1.20155e-13	C3_mregDC
Polr3c	3.11181e-22	1.77446	0.61	0.206	5.78486e-18	C3_mregDC
Zc3h7b	1.2164e-18	1.77396	0.37	0.086	2.26128e-14	C3_mregDC
Mab21l3	3.01916e-28	1.77047	0.17	0.005	5.61261e-24	C3_mregDC
Procr	1.99743e-11	1.76848	0.28	0.078	3.71322e-07	C3_mregDC
Rcsd1	1.04866e-19	1.76836	0.68	0.295	1.94946e-15	C3_mregDC
Atp6v0a1	1.50257e-17	1.76741	0.5	0.163	2.79328e-13	C3_mregDC
Chst7	1.22851e-13	1.76683	0.18	0.027	2.28379e-09	C3_mregDC
Efna2	6.56348e-38	1.76575	0.19	0.002	1.22015e-33	C3_mregDC
Fmn1	2.45509e-20	1.76483	0.13	0.005	4.56401e-16	C3_mregDC
Map3k14	4.04751e-19	1.76206	0.68	0.325	7.52432e-15	C3_mregDC
Rnf115	9.91176e-24	1.76164	0.74	0.339	1.8426e-19	C3_mregDC
Adam19	7.18555e-14	1.758	0.52	0.22	1.33579e-09	C3_mregDC
Mxd1	4.16961e-24	1.75345	0.77	0.362	7.7513e-20	C3_mregDC
Fut4	2.5092e-15	1.75274	0.3	0.067	4.6646e-11	C3_mregDC
Iffo2	1.58872e-13	1.74818	0.43	0.147	2.95343e-09	C3_mregDC
Ric1	7.2767e-21	1.7441	0.5	0.142	1.35274e-16	C3_mregDC
Zfand6	1.08891e-18	1.74347	0.83	0.525	2.02429e-14	C3_mregDC
Hivep1	4.12307e-21	1.74216	0.77	0.427	7.6648e-17	C3_mregDC
Cttnbp2nl	5.98194e-18	1.74206	0.53	0.182	1.11204e-13	C3_mregDC
Tank	3.55325e-21	1.73904	0.74	0.341	6.60549e-17	C3_mregDC
Pik3r1	8.27609e-18	1.73782	0.81	0.517	1.53852e-13	C3_mregDC
Phldb1	5.91721e-17	1.72906	0.18	0.02	1.10001e-12	C3_mregDC
Gga2	2.96579e-13	1.7267	0.34	0.101	5.51339e-09	C3_mregDC
Lamp1	1.30556e-27	1.7232	0.91	0.556	2.42704e-23	C3_mregDC
Ddhd1	3.33996e-19	1.72255	0.61	0.233	6.20899e-15	C3_mregDC
Dip2b	1.23063e-15	1.71596	0.7	0.378	2.28775e-11	C3_mregDC
Cd83	5.14953e-24	1.71529	0.91	0.629	9.57297e-20	C3_mregDC
Pias3	5.02991e-21	1.70993	0.32	0.055	9.35061e-17	C3_mregDC
Ube2l6	8.01965e-15	1.70303	0.33	0.084	1.49085e-10	C3_mregDC
Enox2	4.33779e-13	1.7012	0.37	0.122	8.06395e-09	C3_mregDC
Wnt11	2.82172e-15	1.70053	0.27	0.054	5.24557e-11	C3_mregDC
Pi4k2b	1.82288e-12	1.69505	0.29	0.077	3.38874e-08	C3_mregDC
Wnk1	1.34394e-21	1.69419	0.91	0.742	2.49838e-17	C3_mregDC
Cmc2	3.57338e-08	1.69383	0.44	0.229	0.000664292	C3_mregDC
Abtb2	1.33232e-13	1.69375	0.13	0.012	2.47678e-09	C3_mregDC
Clip2	9.79623e-16	1.69285	0.36	0.095	1.82112e-11	C3_mregDC
Nampt	4.14571e-09	1.69184	0.61	0.379	7.70687e-05	C3_mregDC
Malat1	8.55042e-33	1.68943	1	0.995	1.58952e-28	C3_mregDC
Clec2d	1.30099e-24	1.67757	0.87	0.618	2.41854e-20	C3_mregDC
Agap1	9.33043e-19	1.67305	0.25	0.036	1.73453e-14	C3_mregDC
Actn1	1.34827e-17	1.67219	0.74	0.351	2.50643e-13	C3_mregDC
Anxa4	1.48456e-24	1.67134	0.76	0.324	2.7598e-20	C3_mregDC
Zfp809	1.53321e-18	1.66817	0.45	0.128	2.85023e-14	C3_mregDC
Frmd4a	4.95868e-10	1.65957	0.42	0.191	9.21819e-06	C3_mregDC
Gm37422	4.01422e-27	1.64909	0.14	0.002	7.46244e-23	C3_mregDC
Cstb	2.11126e-09	1.64667	0.66	0.513	3.92484e-05	C3_mregDC
Nuak1	2.60992e-23	1.64489	0.13	0.003	4.85185e-19	C3_mregDC
Rab21	2.48887e-28	1.64357	0.91	0.617	4.62682e-24	C3_mregDC
Nck2	2.92126e-13	1.63889	0.28	0.066	5.43062e-09	C3_mregDC
Dnajb2	2.41615e-15	1.63453	0.46	0.159	4.49163e-11	C3_mregDC
Rasal2	2.47491e-18	1.63008	0.26	0.041	4.60085e-14	C3_mregDC
Plcl1	4.11194e-17	1.62745	0.19	0.022	7.6441e-13	C3_mregDC
Hmgn3	2.53565e-09	1.62615	0.57	0.349	4.71378e-05	C3_mregDC
Stoml1	6.72672e-11	1.62352	0.26	0.072	1.2505e-06	C3_mregDC
Rras2	3.65851e-21	1.61328	0.49	0.129	6.80117e-17	C3_mregDC
Vdr	1.49298e-10	1.61119	0.19	0.039	2.77544e-06	C3_mregDC
Ly96	1.58773e-11	1.60395	0.2	0.04	2.95159e-07	C3_mregDC
Zbtb18	4.14669e-12	1.60263	0.52	0.245	7.7087e-08	C3_mregDC
Nfat5	3.78177e-19	1.59952	0.68	0.309	7.03031e-15	C3_mregDC
Oasl1	4.21173e-08	1.59894	0.17	0.041	0.000782961	C3_mregDC
Gm16685	5.39258e-25	1.5974	0.13	0.002	1.00248e-20	C3_mregDC
Rap2a	3.67222e-17	1.596	0.7	0.352	6.82666e-13	C3_mregDC
Adam11	4.67157e-12	1.59294	0.21	0.04	8.68444e-08	C3_mregDC
Apobec3	6.58402e-20	1.57839	0.86	0.573	1.22397e-15	C3_mregDC
Sdhaf1	3.40577e-16	1.57293	0.54	0.203	6.33133e-12	C3_mregDC
Il21r	1.64919e-22	1.57156	0.68	0.237	3.06584e-18	C3_mregDC
Csf2rb2	4.06355e-24	1.56934	0.62	0.188	7.55414e-20	C3_mregDC
Stxbp3	4.18938e-19	1.56499	0.73	0.361	7.78806e-15	C3_mregDC
Smurf1	7.62122e-13	1.56406	0.42	0.149	1.41678e-08	C3_mregDC
Sqstm1	1.47621e-15	1.56231	0.84	0.596	2.74428e-11	C3_mregDC
Got1	4.86938e-11	1.56189	0.6	0.334	9.05218e-07	C3_mregDC
Plxnd1	6.4147e-14	1.56007	0.62	0.303	1.19249e-09	C3_mregDC
Trim7	4.4708e-10	1.55391	0.34	0.121	8.31123e-06	C3_mregDC
Mif4gd	1.67624e-19	1.55361	0.69	0.3	3.11612e-15	C3_mregDC
Bmt2	3.07395e-19	1.55086	0.66	0.271	5.71447e-15	C3_mregDC
Plaat3	1.66509e-09	1.54599	0.52	0.266	3.09539e-05	C3_mregDC
Ptger4	4.37017e-21	1.54177	0.69	0.263	8.12414e-17	C3_mregDC
Mtmr4	1.09096e-15	1.53863	0.64	0.284	2.02809e-11	C3_mregDC
Pnpla8	8.89968e-14	1.5315	0.64	0.329	1.65445e-09	C3_mregDC
Gfpt1	4.11249e-19	1.52447	0.72	0.373	7.64512e-15	C3_mregDC
Klhl8	1.20057e-12	1.52424	0.18	0.029	2.23187e-08	C3_mregDC
Tbc1d1	6.01606e-14	1.5234	0.62	0.291	1.11839e-09	C3_mregDC
Pxdc1	2.96244e-07	1.51102	0.17	0.046	0.00550717	C3_mregDC
Tox3	6.20656e-09	1.50913	0.11	0.016	0.00011538	C3_mregDC
Prmt2	7.69842e-16	1.50718	0.25	0.044	1.43114e-11	C3_mregDC
AA467197	2.90925e-19	1.50691	0.62	0.22	5.40829e-15	C3_mregDC
Sav1	1.4059e-09	1.50691	0.41	0.171	2.61356e-05	C3_mregDC
Traf6	1.97399e-12	1.5032	0.46	0.179	3.66964e-08	C3_mregDC
Ggta1	3.69856e-15	1.49724	0.54	0.214	6.87562e-11	C3_mregDC
Gm36043	1.65311e-17	1.49611	0.2	0.024	3.07314e-13	C3_mregDC
Vopp1	3.77433e-16	1.4936	0.46	0.146	7.01648e-12	C3_mregDC
Gbp9	2.30002e-12	1.49197	0.26	0.061	4.27574e-08	C3_mregDC
Cxcr5	3.42877e-18	1.48954	0.12	0.005	6.37409e-14	C3_mregDC
Yes1	3.78568e-14	1.48848	0.12	0.009	7.03757e-10	C3_mregDC
Cdkn1a	4.21228e-19	1.48584	0.81	0.422	7.83063e-15	C3_mregDC
Idi1	1.35869e-07	1.47789	0.58	0.406	0.0025258	C3_mregDC
Cers6	1.12858e-16	1.47601	0.71	0.346	2.09802e-12	C3_mregDC
Csf2rb	1.70852e-20	1.47478	0.87	0.557	3.17613e-16	C3_mregDC
Gtpbp1	4.5175e-11	1.46971	0.51	0.232	8.39803e-07	C3_mregDC
Psme2	3.4994e-26	1.46855	0.95	0.808	6.50539e-22	C3_mregDC
Tspan33	1.72803e-12	1.46786	0.59	0.304	3.2124e-08	C3_mregDC
Ccdc6	1.6115e-08	1.45715	0.4	0.187	0.000299578	C3_mregDC
Rab9	2.81762e-09	1.45523	0.45	0.218	5.23795e-05	C3_mregDC
C1qtnf6	5.29922e-19	1.45481	0.13	0.006	9.85125e-15	C3_mregDC
Gbp8	4.08273e-10	1.45463	0.27	0.08	7.58979e-06	C3_mregDC
Crebl2	1.51963e-09	1.45289	0.23	0.062	2.82499e-05	C3_mregDC
Fbrsl1	1.63307e-10	1.45189	0.58	0.317	3.03587e-06	C3_mregDC
Asap2	1.30674e-12	1.44688	0.3	0.08	2.42922e-08	C3_mregDC
Ttc39a	1.7481e-12	1.4451	0.19	0.033	3.24972e-08	C3_mregDC
Exoc3l4	3.42763e-16	1.4436	0.15	0.013	6.37197e-12	C3_mregDC
Fmnl2	1.19422e-10	1.44279	0.5	0.241	2.22006e-06	C3_mregDC
Clu	4.27099e-11	1.44192	0.13	0.017	7.93977e-07	C3_mregDC
Gm15503	1.14903e-17	1.44007	0.16	0.013	2.13605e-13	C3_mregDC
Icosl	1.76545e-08	1.4398	0.55	0.323	0.000328196	C3_mregDC
Nfkbib	1.2214e-12	1.43974	0.68	0.415	2.27059e-08	C3_mregDC
Bcl2l1	5.98258e-08	1.42756	0.26	0.091	0.00111216	C3_mregDC
E130208F15Rik	1.87309e-15	1.4254	0.15	0.015	3.48207e-11	C3_mregDC
Ftl1-ps1	3.73638e-15	1.42192	0.38	0.11	6.94592e-11	C3_mregDC
Mpp5	6.43146e-11	1.42069	0.27	0.075	1.19561e-06	C3_mregDC
Ppp4r2	1.80339e-11	1.42001	0.72	0.468	3.35251e-07	C3_mregDC
Chpt1	3.8142e-10	1.4156	0.27	0.08	7.0906e-06	C3_mregDC
Pvr	1.60569e-10	1.41483	0.46	0.203	2.98498e-06	C3_mregDC
Prr14	2.27993e-12	1.41275	0.51	0.209	4.23839e-08	C3_mregDC
Kpna3	2.56991e-07	1.4106	0.55	0.354	0.00477746	C3_mregDC
Ift57	3.12029e-12	1.40461	0.48	0.186	5.80062e-08	C3_mregDC
Ndrg1	6.71156e-08	1.40204	0.38	0.173	0.00124768	C3_mregDC
Fam32a	7.55818e-14	1.4017	0.86	0.723	1.40507e-09	C3_mregDC
Itgb1	8.50432e-27	1.39129	0.94	0.744	1.58095e-22	C3_mregDC
Vrk2	3.83691e-07	1.39026	0.6	0.414	0.00713281	C3_mregDC
Phf11a	2.66972e-08	1.38937	0.4	0.182	0.000496301	C3_mregDC
Ptafr	4.26982e-13	1.38741	0.65	0.325	7.9376e-09	C3_mregDC
Stxbp1	1.08876e-18	1.38067	0.2	0.022	2.02401e-14	C3_mregDC
Jak2	7.50295e-22	1.37829	0.91	0.709	1.3948e-17	C3_mregDC
Nabp1	5.9857e-13	1.37343	0.74	0.442	1.11274e-08	C3_mregDC
Alkbh6	2.81968e-10	1.36554	0.35	0.128	5.24179e-06	C3_mregDC
Lactb	4.16597e-12	1.36332	0.73	0.503	7.74453e-08	C3_mregDC
Kbtbd3	3.26321e-08	1.36081	0.29	0.107	0.000606631	C3_mregDC
Bahd1	1.41256e-08	1.36018	0.29	0.1	0.000262594	C3_mregDC
Gpc1	6.2078e-08	1.35585	0.13	0.026	0.00115403	C3_mregDC
Ccnd2	2.27236e-09	1.35127	0.8	0.581	4.22433e-05	C3_mregDC
Scn4b	1.92198e-13	1.34956	0.1	0.006	3.57297e-09	C3_mregDC
Mvp	2.19844e-15	1.34926	0.73	0.423	4.08689e-11	C3_mregDC
Rptor	4.17783e-08	1.34572	0.34	0.141	0.000776659	C3_mregDC
Inf2	2.08042e-11	1.34287	0.53	0.238	3.86749e-07	C3_mregDC
Atxn7l1	1.81088e-07	1.3414	0.52	0.317	0.00336643	C3_mregDC
4833407H14Rik	1.72892e-11	1.34049	0.37	0.123	3.21407e-07	C3_mregDC
Fbxo11	3.81387e-12	1.33939	0.56	0.255	7.08999e-08	C3_mregDC
Slc49a4	1.48124e-10	1.33203	0.3	0.091	2.75362e-06	C3_mregDC
Birc3	7.4571e-14	1.32521	0.69	0.393	1.38627e-09	C3_mregDC
Tmem131	1.30208e-09	1.32324	0.63	0.402	2.42056e-05	C3_mregDC
Mthfs	4.75205e-11	1.32107	0.46	0.196	8.83407e-07	C3_mregDC
Bhlhe40	1.72569e-18	1.3209	0.85	0.484	3.20805e-14	C3_mregDC
Rapgef2	6.26078e-10	1.31904	0.44	0.186	1.16388e-05	C3_mregDC
Mthfd2	7.35308e-09	1.318	0.64	0.41	0.000136694	C3_mregDC
Cyth1	1.75167e-08	1.31573	0.53	0.312	0.000325636	C3_mregDC
Traf2	1.54735e-07	1.31247	0.34	0.145	0.00287652	C3_mregDC
Plekhg2	2.10175e-09	1.31147	0.34	0.126	3.90716e-05	C3_mregDC
Dglucy	1.79731e-07	1.30941	0.29	0.114	0.00334119	C3_mregDC
Daam1	3.33046e-11	1.30479	0.37	0.126	6.19133e-07	C3_mregDC
Nmnat3	7.45171e-08	1.29981	0.15	0.034	0.00138527	C3_mregDC
Hsd3b7	1.83126e-09	1.29671	0.33	0.122	3.40431e-05	C3_mregDC
Zfp770	1.27015e-09	1.29454	0.25	0.073	2.3612e-05	C3_mregDC
Id2	4.20227e-17	1.29062	0.9	0.657	7.81201e-13	C3_mregDC
St3gal3	8.23926e-12	1.29006	0.27	0.068	1.53168e-07	C3_mregDC
Apobec1	2.92985e-14	1.2885	0.41	0.123	5.44659e-10	C3_mregDC
Tspoap1	9.82005e-08	1.28038	0.18	0.048	0.00182555	C3_mregDC
2210408F21Rik	1.28365e-08	1.277	0.11	0.017	0.000238631	C3_mregDC
Zfp872	1.00654e-22	1.27639	0.11	0.001	1.87117e-18	C3_mregDC
Dclre1a	4.60857e-09	1.2737	0.22	0.06	8.56733e-05	C3_mregDC
Bcl2l2	1.12092e-10	1.27345	0.16	0.028	2.08379e-06	C3_mregDC
Btg1	4.85764e-35	1.27067	1	0.978	9.03035e-31	C3_mregDC
Loxl3	2.14518e-13	1.26957	0.11	0.008	3.98789e-09	C3_mregDC
Rufy3	4.53208e-07	1.2692	0.26	0.098	0.00842514	C3_mregDC
Tmem106a	3.4104e-10	1.26627	0.42	0.17	6.33993e-06	C3_mregDC
Tcf7	3.78488e-16	1.26267	0.22	0.032	7.03609e-12	C3_mregDC
Dynll2	2.72427e-08	1.26174	0.6	0.404	0.000506442	C3_mregDC
Nuak2	2.8683e-12	1.26118	0.7	0.4	5.33218e-08	C3_mregDC
Dram1	2.32428e-07	1.25918	0.19	0.055	0.00432084	C3_mregDC
Ubxn2a	2.35245e-11	1.25705	0.64	0.357	4.37321e-07	C3_mregDC
Mrtfa	1.28751e-08	1.25642	0.64	0.411	0.000239348	C3_mregDC
Lpp	1.62693e-14	1.25376	0.67	0.291	3.02446e-10	C3_mregDC
Mmd	8.17257e-09	1.25155	0.28	0.094	0.000151928	C3_mregDC
Syngr2	4.23004e-22	1.24982	0.96	0.845	7.86364e-18	C3_mregDC
Gnai3	5.22437e-13	1.24969	0.7	0.428	9.71211e-09	C3_mregDC
Spr	1.57305e-09	1.24678	0.47	0.224	2.92431e-05	C3_mregDC
Pus10	1.68125e-08	1.24574	0.29	0.103	0.000312545	C3_mregDC
Klf6	1.39979e-17	1.2457	0.93	0.846	2.60221e-13	C3_mregDC
Gstt1	5.36674e-09	1.24306	0.11	0.016	9.97677e-05	C3_mregDC
Tuba1a	7.88757e-12	1.23654	0.81	0.647	1.4663e-07	C3_mregDC
Aftph	2.15394e-13	1.236	0.77	0.456	4.00417e-09	C3_mregDC
Arap2	5.21195e-11	1.23526	0.53	0.239	9.68901e-07	C3_mregDC
Pde4dip	5.09128e-07	1.23421	0.38	0.185	0.0094647	C3_mregDC
Vps39	4.23982e-07	1.23403	0.3	0.124	0.00788182	C3_mregDC
Calm1	1.35329e-21	1.23275	1	0.975	2.51577e-17	C3_mregDC
Tmem8	4.47881e-08	1.2311	0.36	0.151	0.000832612	C3_mregDC
Gpr65	3.59256e-07	1.22987	0.6	0.385	0.00667857	C3_mregDC
Tbc1d15	3.07156e-08	1.22477	0.53	0.32	0.000571002	C3_mregDC
D130040H23Rik	2.84079e-11	1.22226	0.14	0.02	5.28103e-07	C3_mregDC
Scn2b	1.52776e-07	1.21738	0.14	0.031	0.0028401	C3_mregDC
Specc1	3.41488e-08	1.21382	0.57	0.323	0.000634826	C3_mregDC
Nectin1	5.08552e-13	1.21095	0.6	0.275	9.45397e-09	C3_mregDC
Sdc4	5.68111e-14	1.21006	0.3	0.07	1.05612e-09	C3_mregDC
Mrpl14	8.45588e-12	1.20513	0.73	0.495	1.57195e-07	C3_mregDC
Mcemp1	3.57203e-10	1.20387	0.52	0.234	6.6404e-06	C3_mregDC
Car13	2.8055e-12	1.2008	0.13	0.015	5.21543e-08	C3_mregDC
Car2	3.9179e-09	1.19939	0.21	0.054	7.28337e-05	C3_mregDC
Clptm1	5.35423e-13	1.19924	0.64	0.33	9.9535e-09	C3_mregDC
Map4	1.52548e-11	1.19683	0.69	0.424	2.83586e-07	C3_mregDC
St8sia4	5.51722e-09	1.19339	0.74	0.57	0.000102565	C3_mregDC
Pik3r5	6.35409e-08	1.1871	0.48	0.266	0.00118123	C3_mregDC
Sgpl1	3.81091e-09	1.18365	0.62	0.381	7.08449e-05	C3_mregDC
Casp4	2.43284e-07	1.18229	0.4	0.187	0.00452266	C3_mregDC
Ftl1	8.94596e-25	1.18145	0.98	0.966	1.66305e-20	C3_mregDC
Herc6	1.78404e-09	1.17849	0.35	0.13	3.31653e-05	C3_mregDC
Rbbp8	2.37016e-10	1.17672	0.63	0.369	4.40613e-06	C3_mregDC
Chst11	3.39105e-11	1.16208	0.27	0.074	6.30396e-07	C3_mregDC
Cx3cl1	2.04159e-10	1.16068	0.17	0.032	3.79532e-06	C3_mregDC
F730043M19Rik	5.02301e-11	1.15807	0.22	0.05	9.33777e-07	C3_mregDC
Pde4d	1.95983e-07	1.15765	0.11	0.02	0.00364333	C3_mregDC
Aplp2	7.94934e-11	1.15734	0.62	0.346	1.47778e-06	C3_mregDC
Chka	2.29063e-12	1.15638	0.52	0.227	4.25827e-08	C3_mregDC
Pxmp2	6.34185e-13	1.15526	0.13	0.013	1.17895e-08	C3_mregDC
Rnf181	1.18412e-07	1.14079	0.38	0.171	0.00220129	C3_mregDC
Rab12	1.28007e-08	1.13861	0.39	0.163	0.000237964	C3_mregDC
Plgrkt	4.47753e-07	1.13614	0.55	0.343	0.00832373	C3_mregDC
Stat3	2.83923e-16	1.13546	0.86	0.609	5.27812e-12	C3_mregDC
Gstt3	2.70684e-07	1.13529	0.17	0.046	0.00503202	C3_mregDC
Tyk2	3.08186e-10	1.1279	0.57	0.291	5.72918e-06	C3_mregDC
Cep350	1.81826e-15	1.12402	0.81	0.489	3.38014e-11	C3_mregDC
Kif1b	3.89364e-11	1.122	0.43	0.166	7.23827e-07	C3_mregDC
Cytip	1.63459e-14	1.12062	0.95	0.886	3.0387e-10	C3_mregDC
B2m	3.25497e-29	1.11876	0.99	0.982	6.05099e-25	C3_mregDC
Irf1	2.71754e-07	1.1172	0.66	0.483	0.00505191	C3_mregDC
Slc25a29	3.73743e-10	1.11557	0.1	0.01	6.94789e-06	C3_mregDC
Foxn2	1.18773e-10	1.11045	0.65	0.374	2.20799e-06	C3_mregDC
Pbxip1	6.57964e-09	1.1101	0.64	0.371	0.000122315	C3_mregDC
H2-K1	2.09358e-28	1.10927	1	0.98	3.89196e-24	C3_mregDC
Izumo4	4.67696e-08	1.1077	0.18	0.046	0.000869447	C3_mregDC
Pogk	3.32016e-08	1.1049	0.24	0.075	0.000617218	C3_mregDC
Rgs12	1.72738e-09	1.1046	0.42	0.166	3.2112e-05	C3_mregDC
Rgs3	4.81757e-07	1.10308	0.49	0.273	0.00895587	C3_mregDC
Tes	5.49839e-11	1.10138	0.78	0.575	1.02215e-06	C3_mregDC
Dnm1l	3.4928e-11	1.10093	0.71	0.447	6.49311e-07	C3_mregDC
Stk4	2.59909e-14	1.09539	0.86	0.689	4.83171e-10	C3_mregDC
Plekhg1	2.96007e-13	1.09277	0.11	0.008	5.50277e-09	C3_mregDC
Eml6	1.29784e-08	1.09223	0.17	0.038	0.000241269	C3_mregDC
Slc6a6	4.78066e-12	1.08766	0.82	0.628	8.88724e-08	C3_mregDC
Tmbim1	6.1967e-08	1.08044	0.33	0.133	0.00115197	C3_mregDC
Tubb2a	3.17975e-07	1.07984	0.52	0.299	0.00591116	C3_mregDC
Dock9	3.96218e-14	1.07467	0.11	0.007	7.36569e-10	C3_mregDC
Dusp5	3.06377e-12	1.05902	0.86	0.674	5.69556e-08	C3_mregDC
Plekhb2	5.2636e-11	1.05745	0.59	0.309	9.78504e-07	C3_mregDC
Malt1	1.01174e-13	1.05237	0.89	0.602	1.88082e-09	C3_mregDC
Ilrun	8.5876e-09	1.04976	0.58	0.327	0.000159644	C3_mregDC
Etv6	1.71382e-13	1.04685	0.85	0.609	3.186e-09	C3_mregDC
Agrn	7.85336e-08	1.04597	0.12	0.022	0.00145994	C3_mregDC
Myo1c	1.52003e-07	1.03483	0.6	0.381	0.00282573	C3_mregDC
Znfx1	1.1974e-07	1.0247	0.47	0.238	0.00222597	C3_mregDC
Grk3	4.08572e-13	1.02276	0.9	0.647	7.59535e-09	C3_mregDC
Il4ra	1.14582e-07	1.01657	0.51	0.282	0.00213008	C3_mregDC
Polb	6.78145e-08	1.01588	0.66	0.453	0.00126067	C3_mregDC
Rbpms	6.78188e-12	1.01333	0.51	0.205	1.26075e-07	C3_mregDC
Slc25a10	5.89353e-10	1.0109	0.25	0.068	1.09561e-05	C3_mregDC
Csf1	5.06171e-27	5.87442	0.201	0.015	9.40973e-23	Undetermined
Cyp11a1	4.01064e-36	5.75068	0.17	0	7.45577e-32	Undetermined
Hdc	2.50959e-16	5.65233	0.239	0.055	4.66533e-12	Undetermined
Gata2	4.25486e-38	4.53049	0.201	0.003	7.90978e-34	Undetermined
Igfbp7	3.32877e-14	4.36855	0.107	0.009	6.18818e-10	Undetermined
Cpa3	1.03525e-22	4.19214	0.132	0.004	1.92453e-18	Undetermined
Hgf	4.3126e-21	4.15518	0.176	0.018	8.01712e-17	Undetermined
Osm	1.30815e-07	4.12139	0.208	0.084	0.00243185	Undetermined
Mcpt8	3.59294e-24	4.11085	0.119	0.001	6.67927e-20	Undetermined
Ms4a2	1.38729e-30	3.92457	0.151	0.001	2.57897e-26	Undetermined
Cd200r3	1.67142e-22	3.88581	0.151	0.009	3.10717e-18	Undetermined
Acod1	4.42984e-16	3.84649	0.151	0.019	8.23508e-12	Undetermined
Sytl3	1.37104e-27	3.82889	0.182	0.01	2.54876e-23	Undetermined
Egfl7	4.07936e-07	3.56249	0.107	0.025	0.00758352	Undetermined
S1pr1	3.52887e-14	3.45642	0.126	0.014	6.56018e-10	Undetermined
Itk	1.40538e-24	3.43231	0.157	0.008	2.61261e-20	Undetermined
Fcer1a	5.04554e-27	3.37882	0.126	0	9.37966e-23	Undetermined
Ets1	1.14553e-16	3.25707	0.233	0.051	2.12953e-12	Undetermined
Cxcr2	1.56168e-17	3.18985	0.17	0.022	2.90315e-13	Undetermined
Rab44	2.79114e-22	3.18479	0.164	0.012	5.18874e-18	Undetermined
Tmem71	6.63127e-11	3.18304	0.22	0.07	1.23275e-06	Undetermined
Gstm1	7.58257e-12	3.05907	0.17	0.038	1.4096e-07	Undetermined
Itga2b	7.6164e-23	3.01459	0.132	0.004	1.41589e-18	Undetermined
Igf1r	5.32709e-13	2.99833	0.195	0.045	9.90306e-09	Undetermined
Ccl9	8.95077e-09	2.97624	0.34	0.179	0.000166395	Undetermined
Gzmb	1.29803e-10	2.94746	0.107	0.015	2.41304e-06	Undetermined
Slc18a2	4.17304e-19	2.93551	0.138	0.01	7.75768e-15	Undetermined
Fn1	1.17862e-07	2.83454	0.17	0.057	0.00219106	Undetermined
Il18rap	1.36203e-07	2.8004	0.245	0.11	0.00253202	Undetermined
Tjp1	2.31139e-12	2.70977	0.101	0.01	4.29688e-08	Undetermined
Dmxl2	4.82372e-16	2.62796	0.126	0.011	8.9673e-12	Undetermined
Ctsd	4.95637e-10	2.53312	0.447	0.282	9.21388e-06	Undetermined
Apoe	2.14773e-10	2.43609	0.296	0.125	3.99263e-06	Undetermined
Gimap1	6.42047e-10	2.43208	0.164	0.042	1.19357e-05	Undetermined
Mirt1	1.04372e-07	2.3963	0.17	0.057	0.00194027	Undetermined
C5ar1	4.82802e-13	2.35122	0.101	0.009	8.97529e-09	Undetermined
Neat1	2.68582e-12	2.18271	0.818	0.839	4.99293e-08	Undetermined
Igfbp4	3.99478e-09	2.16626	0.164	0.044	7.4263e-05	Undetermined
Alox5	6.41783e-08	2.14374	0.138	0.038	0.00119307	Undetermined
Aqp9	2.31403e-09	2.11874	0.113	0.021	4.30178e-05	Undetermined
Rhob	2.57813e-11	2.09744	0.409	0.211	4.79274e-07	Undetermined
Acss2	1.58154e-07	2.06895	0.201	0.077	0.00294008	Undetermined
Nfe2	1.87049e-08	1.7873	0.138	0.035	0.000347724	Undetermined
Ripor2	1.57253e-08	1.77084	0.428	0.252	0.000292334	Undetermined
Cuedc1	2.34437e-09	1.63372	0.132	0.029	4.35819e-05	Undetermined
Lars2	1.61948e-11	1.6259	0.912	0.937	3.01061e-07	Undetermined
Clk1	5.29642e-13	1.16108	0.855	0.841	9.84604e-09	Undetermined

## Sheet: DEGs_DCs_treat_vs_untreat
Cluster	Gene	p-value	average_log2FC(FL/αCD40 versus aIgG)	pct_in_FL/αCD40	pct_in_ aIgG	FDR
C0_cDC2	Tsc22d3	5.71307e-34	2.58883	0.812	0.296	1.06206e-29
C0_cDC2	Ccl5	4.48927e-14	2.47416	0.58	0.253	8.34555e-10
C0_cDC2	Klf2	1.02396e-28	2.37965	0.849	0.512	1.90354e-24
C0_cDC2	Pglyrp1	1.83048e-17	2.30471	0.522	0.13	3.40287e-13
C0_cDC2	Gzma	7.78846e-12	2.24596	0.38	0.093	1.44788e-07
C0_cDC2	Sept1	9.47998e-14	2.21889	0.386	0.068	1.76233e-09
C0_cDC2	Ddit4	8.51654e-08	2.06684	0.352	0.148	0.00158323
C0_cDC2	Fyb	5.08111e-21	2.00087	0.719	0.383	9.44578e-17
C0_cDC2	Cd7	5.11886e-13	1.9714	0.565	0.235	9.51596e-09
C0_cDC2	Ltb	4.74467e-16	1.87924	0.664	0.34	8.82034e-12
C0_cDC2	Bex6	1.03041e-08	1.87317	0.386	0.173	0.000191553
C0_cDC2	Ptprcap	9.4784e-09	1.82935	0.346	0.111	0.000176203
C0_cDC2	Hist1h1e	2.66796e-08	1.82821	0.41	0.198	0.000495974
C0_cDC2	Ripor2	9.15074e-12	1.80648	0.414	0.111	1.70112e-07
C0_cDC2	Hist1h4d	4.45191e-13	1.77538	0.41	0.099	8.27609e-09
C0_cDC2	Avpi1	9.59971e-13	1.62957	0.694	0.488	1.78459e-08
C0_cDC2	Gm34680	3.31925e-08	1.59647	0.309	0.08	0.000617049
C0_cDC2	Tbc1d10c	5.65798e-09	1.57439	0.41	0.185	0.000105182
C0_cDC2	Tmem51	2.60885e-08	1.55354	0.367	0.148	0.000484985
C0_cDC2	Ramp1	1.40432e-16	1.53936	0.725	0.414	2.61063e-12
C0_cDC2	Lbh	9.84827e-17	1.50171	0.738	0.469	1.83079e-12
C0_cDC2	Ifitm6	5.17833e-13	1.41277	0.627	0.321	9.62652e-09
C0_cDC2	Mef2c	1.80446e-13	1.39969	0.833	0.667	3.35448e-09
C0_cDC2	Sh2d3c	4.59801e-07	1.36807	0.34	0.136	0.0085477
C0_cDC2	Ncf4	1.46108e-12	1.35345	0.66	0.426	2.71614e-08
C0_cDC2	Mrps26	5.17191e-08	1.3307	0.41	0.204	0.000961458
C0_cDC2	Lst1	8.72518e-15	1.30221	0.799	0.562	1.62201e-10
C0_cDC2	Lmna	5.52624e-08	1.29117	0.481	0.247	0.00102733
C0_cDC2	Sirt3	1.76226e-08	1.27651	0.309	0.08	0.000327603
C0_cDC2	Lyst	3.10516e-09	1.23508	0.673	0.512	5.7725e-05
C0_cDC2	Rsrp1	1.36319e-20	1.23056	0.904	0.728	2.53417e-16
C0_cDC2	Slc44a2	5.65973e-10	1.20044	0.537	0.29	1.05214e-05
C0_cDC2	Itga4	1.21014e-15	1.19817	0.91	0.778	2.24966e-11
C0_cDC2	Dusp2	9.42449e-08	1.19653	0.593	0.364	0.00175201
C0_cDC2	Hist1h2ap	5.70189e-16	1.19207	0.636	0.284	1.05998e-11
C0_cDC2	Hist1h2ae	4.46036e-07	1.18019	0.33	0.123	0.0082918
C0_cDC2	Gmfg	2.69548e-21	1.17555	0.923	0.722	5.01089e-17
C0_cDC2	Ypel3	1.64184e-08	1.16181	0.552	0.37	0.000305218
C0_cDC2	2410006H16Rik	2.894e-19	1.14061	0.886	0.691	5.37994e-15
C0_cDC2	Plekhm3	4.94794e-07	1.13781	0.491	0.302	0.00919822
C0_cDC2	Arhgap15	7.02678e-11	1.09399	0.707	0.531	1.30628e-06
C0_cDC2	Limd2	7.89261e-15	1.0822	0.877	0.747	1.46724e-10
C0_cDC2	Gpr141	3.44708e-08	1.07289	0.556	0.309	0.000640812
C0_cDC2	Plac8	2.36251e-16	1.07033	0.88	0.5	4.39191e-12
C0_cDC2	Ogfrl1	6.57972e-08	1.06269	0.568	0.407	0.00122317
C0_cDC2	Sik1	1.54938e-09	1.04497	0.63	0.377	2.8803e-05
C0_cDC2	Gm26532	2.74205e-07	1.02583	0.633	0.488	0.00509747
C0_cDC2	Tnfsf12	4.83629e-07	-1.00299	0.049	0.198	0.00899067
C0_cDC2	Lmnb1	4.75054e-09	-1.00385	0.287	0.574	8.83125e-05
C0_cDC2	Peli2	2.19348e-07	-1.00671	0.009	0.111	0.00407769
C0_cDC2	Skil	5.69564e-10	-1.00859	0.54	0.784	1.05882e-05
C0_cDC2	Arid5a	3.67581e-07	-1.01185	0.219	0.457	0.00683333
C0_cDC2	Slc7a5	4.62711e-07	-1.0228	0.096	0.278	0.0086018
C0_cDC2	Stx3	1.34817e-09	-1.02749	0.111	0.352	2.50626e-05
C0_cDC2	Cysltr1	3.23121e-08	-1.03038	0.235	0.494	0.000600683
C0_cDC2	Ctnnd1	2.19403e-07	-1.03267	0.046	0.198	0.0040787
C0_cDC2	B4galt6	7.38174e-08	-1.04043	0.231	0.463	0.00137227
C0_cDC2	Lilrb4a	1.95859e-13	-1.04735	0.284	0.636	3.64101e-09
C0_cDC2	Hif1a	1.76116e-09	-1.04936	0.429	0.673	3.274e-05
C0_cDC2	Sema4a	9.97624e-11	-1.05557	0.306	0.623	1.85458e-06
C0_cDC2	Cflar	1.54613e-07	-1.0613	0.306	0.549	0.00287425
C0_cDC2	Arl8b	6.49949e-12	-1.06445	0.367	0.691	1.20825e-07
C0_cDC2	Chst11	2.07416e-09	-1.06519	0.012	0.148	3.85587e-05
C0_cDC2	Abca9	1.19221e-07	-1.06702	0.04	0.185	0.00221632
C0_cDC2	Clec5a	3.68542e-07	-1.07364	0.031	0.16	0.00685119
C0_cDC2	Gm42418	3.01561e-41	-1.07798	1	1	5.60601e-37
C0_cDC2	Tns4	2.43384e-07	-1.07891	0.022	0.142	0.00452451
C0_cDC2	Tent5a	3.56695e-14	-1.08256	0.327	0.679	6.63096e-10
C0_cDC2	Fcor	7.65603e-08	-1.09833	0.108	0.309	0.00142326
C0_cDC2	Gpr171	1.07434e-09	-1.10706	0.269	0.568	1.9972e-05
C0_cDC2	Ppa1	1.39884e-09	-1.12347	0.185	0.457	2.60045e-05
C0_cDC2	Arhgap18	1.8459e-09	-1.12453	0.315	0.605	3.43153e-05
C0_cDC2	4930512J16Rik	3.0804e-09	-1.12812	0	0.105	5.72647e-05
C0_cDC2	Vdr	7.05224e-08	-1.13285	0.019	0.142	0.00131101
C0_cDC2	Pea15a	1.47639e-10	-1.13543	0.278	0.574	2.7446e-06
C0_cDC2	Clic4	5.86493e-11	-1.13645	0.534	0.753	1.09029e-06
C0_cDC2	Aplp2	5.47787e-10	-1.13978	0.281	0.574	1.01834e-05
C0_cDC2	Tnfsf9	1.56363e-07	-1.14368	0.148	0.352	0.00290679
C0_cDC2	Lars2	6.07539e-21	-1.16106	0.914	0.981	1.12941e-16
C0_cDC2	Cst3	1.87927e-18	-1.16139	0.997	0.988	3.49356e-14
C0_cDC2	Treml2	1.05228e-08	-1.16648	0.071	0.265	0.000195619
C0_cDC2	Gadd45b	2.19932e-13	-1.16697	0.386	0.728	4.08853e-09
C0_cDC2	Runx1	7.57652e-18	-1.16788	0.42	0.802	1.40848e-13
C0_cDC2	Plekha5	7.76027e-09	-1.16911	0.083	0.284	0.000144263
C0_cDC2	Hk2	8.14464e-13	-1.17492	0.664	0.852	1.51409e-08
C0_cDC2	Igsf8	8.39994e-11	-1.17527	0.194	0.481	1.56155e-06
C0_cDC2	Bcl2a1a	5.06527e-12	-1.17957	0.256	0.574	9.41634e-08
C0_cDC2	Slc52a3	2.58324e-09	-1.18923	0.015	0.154	4.80224e-05
C0_cDC2	Spint1	3.22718e-10	-1.18998	0.259	0.556	5.99932e-06
C0_cDC2	Actn1	1.48065e-10	-1.19244	0.275	0.574	2.75254e-06
C0_cDC2	Fosl2	1.66155e-09	-1.195	0.361	0.654	3.08882e-05
C0_cDC2	Gm15564	2.96863e-08	-1.19987	0.059	0.235	0.000551868
C0_cDC2	Tjp2	4.4774e-08	-1.20401	0.052	0.222	0.000832349
C0_cDC2	Ptpn4	2.55796e-07	-1.20429	0.117	0.315	0.00475524
C0_cDC2	Wls	2.65687e-10	-1.2209	0.111	0.358	4.93913e-06
C0_cDC2	Blnk	2.79913e-09	-1.22221	0.025	0.179	5.20359e-05
C0_cDC2	Carhsp1	6.39541e-09	-1.23366	0.09	0.302	0.000118891
C0_cDC2	Igsf9	1.52014e-07	-1.23579	0.031	0.167	0.00282595
C0_cDC2	Tnfrsf12a	3.69934e-07	-1.23611	0.052	0.204	0.00687708
C0_cDC2	Adam23	5.03905e-08	-1.24197	0.123	0.333	0.000936759
C0_cDC2	Tmem176a	1.79234e-11	-1.24771	0.383	0.685	3.33195e-07
C0_cDC2	Tbxas1	1.26866e-09	-1.24934	0.093	0.315	2.35844e-05
C0_cDC2	Cpq	4.38952e-08	-1.25117	0.04	0.191	0.000816013
C0_cDC2	Mast4	2.47303e-08	-1.25472	0.059	0.235	0.000459737
C0_cDC2	Pilra	1.04709e-08	-1.26323	0.111	0.321	0.000194653
C0_cDC2	Csf2rb	2.80312e-14	-1.26726	0.472	0.772	5.21101e-10
C0_cDC2	Bhlhe40	3.77529e-20	-1.27392	0.537	0.895	7.01826e-16
C0_cDC2	Cttnbp2nl	4.17902e-10	-1.28939	0.071	0.284	7.76879e-06
C0_cDC2	Rab3il1	1.58072e-10	-1.29377	0.031	0.21	2.93855e-06
C0_cDC2	Rap2a	3.18569e-13	-1.30946	0.275	0.599	5.9222e-09
C0_cDC2	F11r	8.60603e-11	-1.31486	0.176	0.463	1.59986e-06
C0_cDC2	Klrb1b	6.88663e-14	-1.31488	0.123	0.426	1.28022e-09
C0_cDC2	Col27a1	8.71919e-10	-1.35414	0.003	0.123	1.6209e-05
C0_cDC2	Trio	7.24004e-11	-1.36261	0.117	0.37	1.34592e-06
C0_cDC2	Gpr55	1.01293e-07	-1.36489	0.012	0.123	0.00188303
C0_cDC2	Naaa	5.2518e-12	-1.37114	0.327	0.63	9.7631e-08
C0_cDC2	Ppp1r1a	5.26224e-09	-1.38392	0.006	0.123	9.7825e-05
C0_cDC2	Ramp3	4.54092e-09	-1.38394	0.022	0.167	8.44156e-05
C0_cDC2	Olfm1	2.66039e-18	-1.39318	0.435	0.802	4.94566e-14
C0_cDC2	Pros1	5.25804e-09	-1.4073	0.028	0.179	9.7747e-05
C0_cDC2	Pdcd1lg2	2.55812e-08	-1.42115	0.019	0.148	0.000475554
C0_cDC2	Myof	4.718e-14	-1.43876	0.136	0.457	8.77076e-10
C0_cDC2	Adam15	8.42527e-11	-1.44615	0.102	0.346	1.56626e-06
C0_cDC2	Fcgr3	1.00359e-09	-1.45016	0.102	0.321	1.86568e-05
C0_cDC2	Il7r	2.37391e-07	-1.45845	0.108	0.296	0.00441309
C0_cDC2	Basp1	2.0139e-11	-1.46088	0.441	0.71	3.74383e-07
C0_cDC2	Pfkp	6.29219e-15	-1.46306	0.389	0.704	1.16972e-10
C0_cDC2	Mmp25	5.8721e-08	-1.46821	0.034	0.179	0.00109162
C0_cDC2	Mfge8	1.15438e-09	-1.49251	0.12	0.358	2.14599e-05
C0_cDC2	Creb5	2.00186e-20	-1.49958	0.071	0.42	3.72145e-16
C0_cDC2	Afdn	3.48208e-15	-1.50113	0.201	0.549	6.47318e-11
C0_cDC2	Lifr	6.7876e-11	-1.50659	0.133	0.401	1.26182e-06
C0_cDC2	Plxna1	1.21866e-11	-1.51756	0.028	0.216	2.26549e-07
C0_cDC2	Lilr4b	4.47583e-11	-1.5229	0.154	0.414	8.32058e-07
C0_cDC2	Ccnd2	1.41182e-13	-1.52733	0.593	0.827	2.62458e-09
C0_cDC2	Spred1	2.69516e-13	-1.53845	0.145	0.451	5.0103e-09
C0_cDC2	Gstt3	3.83517e-08	-1.54775	0.025	0.16	0.000712957
C0_cDC2	Socs3	1.81149e-20	-1.57124	0.364	0.765	3.36757e-16
C0_cDC2	Socs2	3.57612e-10	-1.58587	0.04	0.222	6.648e-06
C0_cDC2	Cxcl16	7.26685e-17	-1.59631	0.25	0.63	1.35091e-12
C0_cDC2	Cdkn1a	1.37949e-19	-1.61381	0.383	0.765	2.56447e-15
C0_cDC2	Htr7	4.84271e-12	-1.62475	0.034	0.235	9.0026e-08
C0_cDC2	Cd200r1	1.66188e-11	-1.63433	0.08	0.321	3.08944e-07
C0_cDC2	Got1	1.38514e-14	-1.63797	0.191	0.543	2.57497e-10
C0_cDC2	F2rl2	3.285e-11	-1.64069	0.009	0.16	6.10682e-07
C0_cDC2	Aldh1a2	2.87827e-08	-1.64349	0.009	0.123	0.00053507
C0_cDC2	Mt1	6.25194e-09	-1.65208	0.383	0.648	0.000116224
C0_cDC2	Qpct	1.68486e-13	-1.6613	0.117	0.407	3.13216e-09
C0_cDC2	Stk39	2.42687e-12	-1.66674	0.012	0.185	4.51154e-08
C0_cDC2	Pmepa1	1.86254e-13	-1.67929	0.117	0.407	3.46246e-09
C0_cDC2	Gbp7	6.68788e-12	-1.68648	0.108	0.37	1.24328e-07
C0_cDC2	Dcstamp	4.57429e-11	-1.71401	0.04	0.235	8.5036e-07
C0_cDC2	Trib1	4.32804e-21	-1.71717	0.306	0.728	8.04582e-17
C0_cDC2	Fcgr1	2.47689e-11	-1.72357	0.046	0.253	4.60454e-07
C0_cDC2	Fnbp1l	8.4397e-13	-1.7347	0.059	0.296	1.56894e-08
C0_cDC2	Aif1	8.57777e-20	-1.74682	0.343	0.71	1.59461e-15
C0_cDC2	Hepacam2	5.27289e-12	-1.7493	0.08	0.327	9.8023e-08
C0_cDC2	Ccr1	5.13122e-19	-1.77113	0.176	0.568	9.53894e-15
C0_cDC2	Mcemp1	1.26762e-21	-1.77861	0.204	0.617	2.35651e-17
C0_cDC2	Atp6v0a1	9.97859e-19	-1.82852	0.074	0.414	1.85502e-14
C0_cDC2	Etv3	3.18448e-21	-1.8325	0.38	0.772	5.91995e-17
C0_cDC2	Slc30a4	9.51111e-15	-1.89231	0.037	0.278	1.76812e-10
C0_cDC2	Mtss1	3.58066e-18	-1.901	0.102	0.444	6.65644e-14
C0_cDC2	Gda	3.75776e-09	-1.90103	0.068	0.259	6.98568e-05
C0_cDC2	Nr4a3	2.73577e-18	-1.91308	0.228	0.617	5.0858e-14
C0_cDC2	Flrt3	4.47154e-07	-1.95655	0.022	0.136	0.0083126
C0_cDC2	Cd209c	1.29704e-12	-1.96051	0	0.148	2.4112e-08
C0_cDC2	Ccr5	2.00628e-21	-1.97269	0.198	0.611	3.72967e-17
C0_cDC2	Gfra2	1.02243e-12	-1.98926	0.009	0.179	1.90069e-08
C0_cDC2	Dst	8.33491e-15	-1.99288	0.04	0.284	1.54946e-10
C0_cDC2	Ptger4	1.36475e-20	-1.9971	0.179	0.593	2.53707e-16
C0_cDC2	Csf2rb2	3.9878e-15	-1.99935	0.099	0.401	7.41332e-11
C0_cDC2	Cdh1	2.26609e-14	-2.00616	0.077	0.352	4.21265e-10
C0_cDC2	Trf	3.30769e-10	-2.01227	0.216	0.475	6.149e-06
C0_cDC2	Axl	6.68883e-22	-2.01506	0.105	0.5	1.24345e-17
C0_cDC2	Tnip3	6.80124e-21	-2.02818	0.293	0.685	1.26435e-16
C0_cDC2	Egr2	6.35929e-16	-2.06081	0.09	0.395	1.18219e-11
C0_cDC2	Il1rl1	2.21709e-11	-2.06672	0.031	0.216	4.12157e-07
C0_cDC2	Clec4n	2.89944e-13	-2.10166	0.08	0.34	5.39007e-09
C0_cDC2	Il1a	3.01894e-10	-2.15153	0.019	0.173	5.61221e-06
C0_cDC2	Fcgr2b	1.23267e-20	-2.20155	0.167	0.562	2.29153e-16
C0_cDC2	Xlr	2.30639e-10	-2.2351	0.034	0.21	4.28757e-06
C0_cDC2	Dapk1	1.69384e-23	-2.23852	0.151	0.568	3.14885e-19
C0_cDC2	Cldn1	1.36269e-14	-2.256	0.031	0.259	2.53324e-10
C0_cDC2	Gbp2	2.20147e-09	-2.26262	0.12	0.333	4.09253e-05
C0_cDC2	Gbp5	4.26691e-09	-2.28769	0.077	0.272	7.93219e-05
C0_cDC2	Cish	9.89032e-21	-2.31242	0.065	0.407	1.83861e-16
C0_cDC2	Ms4a6d	1.4966e-22	-2.31744	0.09	0.481	2.78218e-18
C0_cDC2	Slamf9	9.31016e-29	-2.33099	0.108	0.574	1.73076e-24
C0_cDC2	Sh3pxd2b	8.61413e-28	-2.46115	0.052	0.463	1.60137e-23
C0_cDC2	Mrc1	3.48421e-12	-2.62792	0.028	0.222	6.47715e-08
C0_cDC2	Plet1	3.36636e-12	-2.81124	0.043	0.253	6.25807e-08
C0_cDC2	AA467197	2.3992e-33	-3.01613	0.12	0.636	4.46011e-29
C0_cDC2	Dab2	1.05962e-30	-3.11862	0.062	0.506	1.96983e-26
C0_cDC2	Cd209d	1.91669e-12	-3.29901	0.006	0.167	3.56312e-08
C0_cDC2	Ccl22	9.41169e-23	-3.73339	0.031	0.358	1.74963e-18
C0_cDC2	Cd209a	1.68806e-36	-3.99527	0.096	0.611	3.1381e-32
C0_cDC2	Cxcl9	7.06136e-13	-4.086	0.056	0.284	1.31271e-08
C0_cDC2	Ccl17	5.93501e-30	-4.3432	0.056	0.488	1.10332e-25
C0_cDC2	Mgl2	9.05663e-41	-4.35234	0.049	0.58	1.68363e-36
C1_cDC1a	Plac8	3.27e-22	5.79441	0.938	0.041	6.07e-18
C1_cDC1a	Sell	1.96e-11	4.27669	0.617	0.041	3.65e-07
C1_cDC1a	Hist1h2ap	4.37e-13	3.40185	0.773	0.163	8.12e-09
C1_cDC1a	Gpr141	3.51e-08	3.15249	0.516	0.082	0.00065226
C1_cDC1a	Hist1h2ae	1.91e-07	3.14755	0.43	0.02	0.00354452
C1_cDC1a	Hist1h1e	9.9e-09	2.83766	0.57	0.082	0.00018406
C1_cDC1a	Ramp1	3.48e-15	2.53251	0.867	0.327	6.47e-11
C1_cDC1a	Lbr	2.91e-07	2.29045	0.547	0.143	0.00540141
C1_cDC1a	Ms4a6c	1.64e-07	2.02674	0.688	0.265	0.00305362
C1_cDC1a	Smim4	3.46e-08	1.97888	0.617	0.122	0.00064317
C1_cDC1a	Fdps	2.66e-07	1.87185	0.734	0.347	0.004937
C1_cDC1a	Epsti1	3.91e-10	1.81755	0.805	0.347	7.27e-06
C1_cDC1a	Tsc22d3	7.4e-10	1.80117	0.852	0.347	1.38e-05
C1_cDC1a	C1qbp	4.84e-09	1.76442	0.766	0.388	9e-05
C1_cDC1a	Klf2	3.29e-10	1.71858	0.945	0.571	6.12e-06
C1_cDC1a	Rac2	1.59e-08	1.70622	0.789	0.327	0.0002951
C1_cDC1a	Ndufa4	1.25e-17	1.68405	0.977	0.694	2.32e-13
C1_cDC1a	Tmsb10	3.27e-21	1.66063	1	0.98	6.09e-17
C1_cDC1a	Ccnd3	3e-10	1.65873	0.836	0.449	5.57e-06
C1_cDC1a	Lgals1	3.11e-09	1.61036	0.969	0.714	5.78e-05
C1_cDC1a	Npc2	8.01e-16	1.55722	1	0.837	1.49e-11
C1_cDC1a	Tagln2	1.78e-13	1.54155	0.992	0.816	3.31e-09
C1_cDC1a	Pycard	1.74e-08	1.52355	0.836	0.49	0.00032306
C1_cDC1a	Lmo4	1.3e-07	1.4821	0.891	0.755	0.00242024
C1_cDC1a	Cdk2ap2	6.87e-10	1.48015	0.906	0.653	1.28e-05
C1_cDC1a	Ndufs8	9.77e-08	1.4775	0.828	0.551	0.00181601
C1_cDC1a	Rbm3	8.1e-18	1.47293	1	0.857	1.51e-13
C1_cDC1a	Samhd1	7.17e-10	1.46287	0.938	0.735	1.33e-05
C1_cDC1a	Eif3i	5.98e-09	1.41958	0.875	0.612	0.00011118
C1_cDC1a	Gmfg	5.24e-10	1.41897	0.969	0.694	9.74e-06
C1_cDC1a	Mrpl30	2.66e-07	1.39183	0.797	0.388	0.00495243
C1_cDC1a	Scand1	4.42e-13	1.38877	0.984	0.776	8.22e-09
C1_cDC1a	Tspo	2.63e-14	1.37591	0.984	0.796	4.88e-10
C1_cDC1a	Psmg4	7.69e-09	1.37295	0.852	0.551	0.00014303
C1_cDC1a	Srp9	4.08e-09	1.35451	0.906	0.612	7.58e-05
C1_cDC1a	Pgls	1.29e-09	1.3312	0.953	0.612	2.39e-05
C1_cDC1a	Gapdh	3.72e-14	1.32624	0.992	0.878	6.92e-10
C1_cDC1a	Spcs2	2.51e-09	1.32161	0.906	0.735	4.67e-05
C1_cDC1a	2410006H16Rik	5.05e-07	1.30871	0.938	0.592	0.00938634
C1_cDC1a	Dnajc15	4.26e-07	1.29075	0.75	0.408	0.00792788
C1_cDC1a	Psma7	1.41e-15	1.28063	1	0.918	2.61e-11
C1_cDC1a	Itga4	2.81e-08	1.25187	0.93	0.735	0.00052329
C1_cDC1a	Bst2	4.2e-08	1.23543	0.922	0.612	0.00078063
C1_cDC1a	Psma5	6.76e-08	1.23335	0.867	0.551	0.0012562
C1_cDC1a	Krtcap2	1.27e-08	1.19415	0.984	0.633	0.00023521
C1_cDC1a	Erp29	1.31e-12	1.17807	0.992	0.878	2.43e-08
C1_cDC1a	1110004F10Rik	3.65e-07	1.15712	0.828	0.633	0.00677911
C1_cDC1a	Ppib	2.15e-12	1.15648	0.992	0.878	4e-08
C1_cDC1a	Taldo1	1.26e-14	1.1512	1	0.878	2.35e-10
C1_cDC1a	Sdhb	3.67e-07	1.14581	0.844	0.571	0.00681536
C1_cDC1a	Tkt	5.54e-09	1.14421	0.984	0.694	0.00010295
C1_cDC1a	Lgals3	4.78e-10	1.14138	0.992	0.857	8.88e-06
C1_cDC1a	Atp5g2	7.03e-13	1.1396	0.984	0.857	1.31e-08
C1_cDC1a	H3f3a	5.09e-16	1.13475	1	0.959	9.46e-12
C1_cDC1a	Psme2	2.09e-10	1.12229	0.953	0.796	3.89e-06
C1_cDC1a	Gas5	2.66e-12	1.1084	1	0.959	4.94e-08
C1_cDC1a	Ndufv3	3.18e-08	1.10341	0.914	0.592	0.00059203
C1_cDC1a	Anxa1	8.51e-08	1.09259	0.969	0.878	0.00158224
C1_cDC1a	Naca	1.44e-15	1.09258	1	0.959	2.69e-11
C1_cDC1a	Abracl	7.05e-09	1.08766	0.961	0.735	0.00013114
C1_cDC1a	Ctsh	1.36e-08	1.08261	0.945	0.837	0.00025264
C1_cDC1a	Ndufb11	9.37e-10	1.07682	0.945	0.755	1.74e-05
C1_cDC1a	Ppia	1.49e-16	1.06529	1	0.959	2.78e-12
C1_cDC1a	Cox5b	1.04e-10	1.05952	0.984	0.796	1.93e-06
C1_cDC1a	Psmb2	3.97e-07	1.05624	0.852	0.633	0.0073769
C1_cDC1a	Sec61b	7.91e-14	1.03351	0.992	0.939	1.47e-09
C1_cDC1a	Eif5a	5.35e-13	1.02201	0.992	0.939	9.95e-09
C1_cDC1a	Psmb8	1.17e-14	1.01363	1	0.939	2.17e-10
C1_cDC1a	Psmb5	3.2e-07	1.01086	0.922	0.673	0.0059539
C1_cDC1a	Btf3	1.48e-15	1.00501	1	0.959	2.76e-11
C1_cDC1a	Naaa	1.15e-08	-1.06039	0.93	0.959	0.00021383
C1_cDC1a	Alcam	1.04e-09	-1.09319	0.758	0.939	1.93e-05
C1_cDC1a	Plek	2.75e-08	-1.09934	0.906	0.959	0.00051074
C1_cDC1a	Jaml	2.27e-08	-1.14102	0.758	0.939	0.00042205
C1_cDC1a	Myh9	1.98e-08	-1.1917	0.875	0.959	0.00036726
C1_cDC1a	Wdfy4	4.61e-14	-1.19206	0.945	1	8.57e-10
C1_cDC1a	Malat1	8.44e-12	-1.44377	1	1	1.57e-07
C1_cDC1a	Arsb	2.27e-08	-1.44526	0.438	0.837	0.00042152
C1_cDC1a	Hivep2	1.59e-08	-1.44581	0.359	0.837	0.00029573
C1_cDC1a	Cd86	4.37e-09	-1.46159	0.461	0.857	8.12e-05
C1_cDC1a	Slco3a1	1.45e-07	-1.46477	0.43	0.755	0.00270061
C1_cDC1a	Itgax	3.21e-10	-1.51617	0.477	0.878	5.97e-06
C1_cDC1a	Csf2rb	3.52e-07	-1.52715	0.523	0.796	0.00655019
C1_cDC1a	Skil	4.16e-08	-1.53541	0.617	0.837	0.00077367
C1_cDC1a	Trerf1	5.53e-09	-1.54161	0.602	0.898	0.00010276
C1_cDC1a	Tes	3.6e-09	-1.54225	0.555	0.857	6.7e-05
C1_cDC1a	Tlr3	4.73e-09	-1.56369	0.562	0.816	8.79e-05
C1_cDC1a	Gm42418	2.35e-18	-1.60886	1	1	4.38e-14
C1_cDC1a	Btla	4.74e-09	-1.61622	0.516	0.857	8.81e-05
C1_cDC1a	Marcks	4.28e-13	-1.6287	0.703	0.959	7.95e-09
C1_cDC1a	Rasgrp4	2.75e-09	-1.63941	0.344	0.776	5.11e-05
C1_cDC1a	Asb2	1.87e-09	-1.64622	0.133	0.571	3.48e-05
C1_cDC1a	Rap2a	3.17e-07	-1.65353	0.242	0.612	0.00589033
C1_cDC1a	Arhgap18	4.98e-09	-1.66206	0.57	0.837	9.26e-05
C1_cDC1a	Havcr2	6.53e-09	-1.68715	0.477	0.857	0.00012138
C1_cDC1a	Xcr1	5.16e-15	-1.70853	0.492	0.959	9.6e-11
C1_cDC1a	Lars2	1.37e-12	-1.7388	0.898	0.98	2.55e-08
C1_cDC1a	Dnase1l3	2.55e-08	-1.76492	0.094	0.469	0.00047401
C1_cDC1a	Baz2b	4.46e-08	-1.77702	0.414	0.837	0.00082991
C1_cDC1a	Zcchc4	5.2e-08	-1.77982	0.109	0.49	0.00096712
C1_cDC1a	St6gal1	3.01e-07	-1.82305	0.07	0.388	0.00559763
C1_cDC1a	Ubash3b	2.13e-09	-1.84891	0.43	0.837	3.97e-05
C1_cDC1a	App	1.61e-10	-1.85441	0.305	0.796	3e-06
C1_cDC1a	Trf	3.56e-10	-1.8701	0.367	0.816	6.61e-06
C1_cDC1a	Cd36	7.51e-13	-1.87397	0.422	0.857	1.4e-08
C1_cDC1a	Lpar3	1.61e-07	-1.89408	0	0.204	0.00298667
C1_cDC1a	Entpd1	2.17e-10	-1.89515	0.172	0.653	4.03e-06
C1_cDC1a	Ank2	1.61e-07	-1.89592	0	0.204	0.00298667
C1_cDC1a	Arhgap31	3.38e-13	-1.91254	0.352	0.857	6.28e-09
C1_cDC1a	Tmbim1	2e-07	-1.93144	0.102	0.449	0.0037094
C1_cDC1a	Sept3	7.14e-11	-1.94982	0.469	0.878	1.33e-06
C1_cDC1a	Trio	2.54e-11	-1.96115	0.211	0.714	4.71e-07
C1_cDC1a	Hfe	5.22e-09	-1.98042	0.266	0.694	9.7e-05
C1_cDC1a	Wnk1	7.7e-13	-1.98341	0.68	0.939	1.43e-08
C1_cDC1a	Trib1	4.08e-07	-1.98774	0.305	0.653	0.00759074
C1_cDC1a	Tbc1d4	5.89e-10	-1.98984	0.555	0.898	1.1e-05
C1_cDC1a	Il18	4.33e-07	-2.00493	0.078	0.388	0.00805409
C1_cDC1a	Egr1	1.72e-09	-2.01502	0.492	0.878	3.21e-05
C1_cDC1a	Spire1	3.04e-07	-2.02018	0.055	0.347	0.00565159
C1_cDC1a	Wtip	1.02e-07	-2.02672	0.031	0.306	0.00189018
C1_cDC1a	Clic4	1.63e-09	-2.03195	0.594	0.898	3.03e-05
C1_cDC1a	Gm35853	2.64e-08	-2.03277	0.062	0.408	0.00048997
C1_cDC1a	B4galt6	1.61e-07	-2.04672	0	0.204	0.00298667
C1_cDC1a	Cadm1	2.23e-15	-2.05228	0.227	0.898	4.14e-11
C1_cDC1a	Lrba	1.27e-08	-2.05349	0.328	0.735	0.00023574
C1_cDC1a	Pir	3.55e-08	-2.06388	0	0.224	0.0006599
C1_cDC1a	Cd81	7.13e-13	-2.07705	0.195	0.776	1.32e-08
C1_cDC1a	Spred1	3.14e-07	-2.07715	0.07	0.367	0.00583817
C1_cDC1a	Cyp8b1	3.43e-07	-2.0825	0.023	0.265	0.00637168
C1_cDC1a	Crim1	3.2e-07	-2.11069	0.047	0.327	0.00594834
C1_cDC1a	Esyt3	9.38e-08	-2.12808	0.016	0.265	0.00174283
C1_cDC1a	Gpr34	3.62e-07	-2.13328	0.055	0.347	0.00673099
C1_cDC1a	Gm15564	4.05e-09	-2.15172	0.023	0.327	7.54e-05
C1_cDC1a	Ly75	1.51e-07	-2.17914	0.203	0.571	0.00281457
C1_cDC1a	Spint1	6.4e-11	-2.1796	0.109	0.571	1.19e-06
C1_cDC1a	Chst11	1.02e-07	-2.17992	0.023	0.286	0.00189932
C1_cDC1a	Gm11837	1.67e-09	-2.18024	0	0.265	3.1e-05
C1_cDC1a	E230029C05Rik	3.74e-08	-2.19125	0.141	0.531	0.00069607
C1_cDC1a	Hepacam2	1.45e-13	-2.19543	0.375	0.837	2.7e-09
C1_cDC1a	Notch4	5.97e-09	-2.19583	0.031	0.347	0.00011103
C1_cDC1a	Pfkp	1.35e-11	-2.23037	0.531	0.918	2.51e-07
C1_cDC1a	Dcstamp	1.31e-07	-2.23565	0.023	0.286	0.00242877
C1_cDC1a	2510009E07Rik	1.8e-11	-2.24029	0.055	0.49	3.35e-07
C1_cDC1a	Emp2	7.38e-11	-2.29815	0	0.306	1.37e-06
C1_cDC1a	Hip1	7.7e-10	-2.32518	0.094	0.51	1.43e-05
C1_cDC1a	Basp1	5.88e-16	-2.33213	0.344	0.918	1.09e-11
C1_cDC1a	Syne2	2.65e-10	-2.33245	0.016	0.347	4.92e-06
C1_cDC1a	Nav1	1.05e-11	-2.35683	0.312	0.816	1.96e-07
C1_cDC1a	Timeless	4.33e-14	-2.37272	0.094	0.653	8.06e-10
C1_cDC1a	Pianp	1.4e-10	-2.37368	0.078	0.49	2.6e-06
C1_cDC1a	Gpr82	1.73e-09	-2.3817	0.023	0.347	3.22e-05
C1_cDC1a	Jup	3.09e-10	-2.3834	0.094	0.51	5.75e-06
C1_cDC1a	Afdn	1.11e-12	-2.41178	0.141	0.653	2.07e-08
C1_cDC1a	Bcl2a1d	1.86e-12	-2.41193	0.258	0.755	3.47e-08
C1_cDC1a	Cxcl16	3.28e-13	-2.42009	0.312	0.796	6.1e-09
C1_cDC1a	Tespa1	3.74e-11	-2.42323	0.055	0.469	6.96e-07
C1_cDC1a	Egr3	6.65e-09	-2.43147	0.234	0.633	0.00012353
C1_cDC1a	Adam23	5.86e-10	-2.46291	0.023	0.347	1.09e-05
C1_cDC1a	Fndc7	1.25e-08	-2.49552	0.031	0.327	0.00023176
C1_cDC1a	Naalad2	4.53e-09	-2.4959	0.023	0.327	8.42e-05
C1_cDC1a	Sh3pxd2b	2.96e-09	-2.52385	0.125	0.531	5.49e-05
C1_cDC1a	Mmp14	2.86e-11	-2.56945	0.008	0.347	5.31e-07
C1_cDC1a	Mtss1	6.78e-14	-2.63473	0.078	0.592	1.26e-09
C1_cDC1a	Dock7	8.5e-12	-2.65108	0.031	0.429	1.58e-07
C1_cDC1a	F2rl2	3.47e-14	-2.65868	0.023	0.469	6.44e-10
C1_cDC1a	Sema6d	2.09e-10	-2.66187	0.016	0.347	3.88e-06
C1_cDC1a	Axl	1.83e-10	-2.6628	0.047	0.429	3.4e-06
C1_cDC1a	Nav2	3.55e-08	-2.69028	0	0.224	0.0006599
C1_cDC1a	AA467197	4.7e-13	-2.70773	0.031	0.49	8.73e-09
C1_cDC1a	Tcea3	1.92e-08	-2.70815	0.016	0.286	0.00035708
C1_cDC1a	Sult1a1	1.53e-13	-2.73589	0.086	0.592	2.84e-09
C1_cDC1a	Bcl2a1a	1.05e-17	-2.76162	0.141	0.796	1.94e-13
C1_cDC1a	Fcrla	2.56e-12	-2.85249	0.047	0.49	4.75e-08
C1_cDC1a	Cd84	1.05e-13	-2.86173	0.047	0.531	1.96e-09
C1_cDC1a	Myo6	6.13e-13	-2.88118	0	0.367	1.14e-08
C1_cDC1a	Zmynd15	8.63e-12	-2.88776	0.008	0.367	1.6e-07
C1_cDC1a	Fnbp1l	2.88e-15	-2.90035	0.094	0.653	5.34e-11
C1_cDC1a	Dst	8.86e-10	-2.97586	0.016	0.327	1.65e-05
C1_cDC1a	Dapk1	1.66e-17	-2.98404	0.148	0.776	3.09e-13
C1_cDC1a	Bcl2a1b	2.62e-15	-3.05874	0.188	0.755	4.88e-11
C1_cDC1a	Qpct	2.55e-18	-3.06853	0.109	0.735	4.74e-14
C1_cDC1a	Pcdh7	5.87e-12	-3.10469	0.008	0.367	1.09e-07
C1_cDC1a	Bhlhe40	6.51e-12	-3.12595	0.18	0.653	1.21e-07
C1_cDC1a	F11r	4.13e-20	-3.24403	0.055	0.714	7.68e-16
C1_cDC1a	Ttc39b	4.5e-22	-3.27251	0.055	0.755	8.36e-18
C1_cDC1a	Timd4	1.41e-12	-3.30778	0.008	0.388	2.62e-08
C1_cDC1a	Phlda1	1.34e-16	-3.43819	0.062	0.633	2.5e-12
C1_cDC1a	Itgae	5.1e-27	-3.49828	0.086	0.939	9.48e-23
C1_cDC1a	Col27a1	3.53e-10	-3.50446	0	0.286	6.57e-06
C1_cDC1a	Igf2r	9.65e-18	-3.50748	0.031	0.592	1.79e-13
C1_cDC1a	Mgl2	5.22e-10	-3.54653	0.008	0.306	9.71e-06
C1_cDC1a	Klrb1b	1.08e-23	-3.58312	0.148	0.898	2.01e-19
C1_cDC1a	Epcam	7.55e-20	-3.65043	0.047	0.673	1.4e-15
C1_cDC1a	Xlr	4.89e-26	-3.81108	0.031	0.816	9.1e-22
C1_cDC1a	Cd207	4.73e-18	-4.03237	0	0.51	8.79e-14
C1_cDC1a	Plet1	6.26e-14	-4.06354	0.047	0.531	1.16e-09
C1_cDC1a	Cldn1	3.15e-25	-4.16092	0.07	0.837	5.86e-21
C1_cDC1a	Ccl22	3.33e-07	-4.7529	0.016	0.245	0.00619911
C1_cDC1a	Ccl17	3.75e-16	-5.80807	0.016	0.51	6.96e-12
C2_cDC1b	Klf2	2.64e-09	2.35438	0.872	0.485	4.9e-05
C2_cDC1b	Tsc22d3	1.62e-09	2.25392	0.881	0.394	3.01e-05
C2_cDC1b	Ramp1	1.03e-08	2.06258	0.835	0.394	0.00019163
C2_cDC1b	Plac8	4.06e-07	1.48644	0.908	0.545	0.00754998
C2_cDC1b	Picalm	4.21e-07	-1.16703	0.743	0.909	0.00782334
C2_cDC1b	Gm42418	8.8e-12	-1.22676	1	1	1.64e-07
C2_cDC1b	Marcks	5.37e-07	-1.34615	0.679	1	0.00998261
C2_cDC1b	Lars2	1.42e-08	-1.37147	0.963	1	0.00026461
C2_cDC1b	Trio	2.48e-07	-1.49209	0.229	0.667	0.00461661
C2_cDC1b	Basp1	1.24e-09	-1.79338	0.303	0.848	2.31e-05
C2_cDC1b	Wtip	5.3e-09	-1.98159	0.009	0.333	9.86e-05
C2_cDC1b	Il4ra	1.6e-07	-2.00667	0.138	0.576	0.00297368
C2_cDC1b	Axl	2.14e-08	-2.15538	0.11	0.545	0.0003977
C2_cDC1b	Spint1	1.22e-10	-2.19553	0.248	0.788	2.27e-06
C2_cDC1b	Slfn1	3.55e-07	-2.19672	0.018	0.303	0.00660711
C2_cDC1b	Bcl2a1b	3.8e-10	-2.24934	0.275	0.848	7.07e-06
C2_cDC1b	Ccnd2	1.07e-07	-2.28839	0.514	0.879	0.00199527
C2_cDC1b	Bcl2a1d	1.19e-10	-2.30904	0.294	0.818	2.2e-06
C2_cDC1b	Rap2a	2.73e-10	-2.37531	0.33	0.788	5.08e-06
C2_cDC1b	Bhlhe40	6.77e-11	-2.49246	0.248	0.788	1.26e-06
C2_cDC1b	Qpct	9.5e-10	-2.53049	0.156	0.667	1.77e-05
C2_cDC1b	Bcl2a1a	8.26e-10	-2.54283	0.147	0.667	1.54e-05
C2_cDC1b	Cldn1	1.14e-07	-2.98106	0.092	0.485	0.00211611
C2_cDC1b	AA467197	1.23e-11	-3.40961	0.092	0.636	2.29e-07
C2_cDC1b	Mgl2	7.87e-09	-4.47493	0.046	0.424	0.00014625
C2_cDC1b	Ccl17	3.99e-11	-5.21737	0.046	0.515	7.42e-07

## Sheet: GSEA_GO_BioProcess_DCs
GSEA on FL/αCD40 versus aIgG comparison for each cluster
cDC Cluster	GO Biological Process ID	GO Biological Process Description	setSize	NES	pvalue	qvalues	associated_genes
C0_cDC2	GO:0045815	positive regulation of gene expression, epigenetic	17	2.17242	0.000432974	0.0036488	H1f4/H1f3/Tet1/Smarcd1/Apobec1/H1f5/Macroh2a1/Elof1
C0_cDC2	GO:0060969	negative regulation of gene silencing	14	2.09287	0.0006574	0.00500541	H1f4/H1f3/Tet1/Apobec1/H1f5/Zc3h10/Trp53
C0_cDC2	GO:0006333	chromatin assembly or disassembly	69	1.9995	0.000351137	0.00311326	H1f4/H4c4/H2bu2/H1f3/Smarcd1/H3c6/H3f3a/H1f5/H4c8/H4c3/H2aw/H2bc4/Tspyl1/Macroh2a1/Chd3/Smarca2/Nap1l1/Trp53/H3c7
C0_cDC2	GO:0006334	nucleosome assembly	49	1.94432	0.00133099	0.00843754	H1f4/H4c4/H2bu2/H1f3/H3c6/H1f5/H4c8/H4c3/H2bc4/Tspyl1/Macroh2a1/Smarca2/Nap1l1/H3c7
C0_cDC2	GO:0031497	chromatin assembly	59	1.91471	0.001087	0.00716259	H1f4/H4c4/H2bu2/H1f3/H3c6/H3f3a/H1f5/H4c8/H4c3/H2bc4/Tspyl1/Macroh2a1/Smarca2/Nap1l1/Trp53/H3c7
C0_cDC2	GO:0031935	regulation of chromatin silencing	17	1.88144	0.00592986	0.0248756	H1f4/H1f3/Tet1/Apobec1/H1f5/Mier1
C0_cDC2	GO:0030219	megakaryocyte differentiation	27	1.87254	0.00456103	0.0205286	H4c4/Mef2c/Rabgap1l/Rab7b/Sh2b3/H4c8/H4c3/Cib1/Ptpn6/Meis1
C0_cDC2	GO:0048641	regulation of skeletal muscle tissue development	20	1.85901	0.00627277	0.0260068	Tsc22d3/Mef2c/Tcf7l2/Adrb2/Hdac9
C0_cDC2	GO:0060236	regulation of mitotic spindle organization	15	1.84548	0.00761822	0.0300497	Hspa1a/Ripor2/Hspa1b
C0_cDC2	GO:0045652	regulation of megakaryocyte differentiation	17	1.83046	0.00865948	0.0330944	H4c4/Mef2c/Rab7b/H4c8/H4c3/Cib1
C0_cDC2	GO:0006397	mRNA processing	171	1.82504	0.00022477	0.00220119	Ctr9/Rbm4/Srpk2/Tia1/Rbm3/Rbm38/Apobec1/Wdr83/Papolg/Bud13/Leo1/Ccnb1/Snrnp48/Srsf7/Ppwd1/Lsm1/Zc3h10/Kin/BC005624/Prpf3/Dhx16/Prpf18/Syf2/Pnn/Scaf11/Luc7l3/Rnf113a2/Rnmt/Gemin7/Cdk9/Zranb2/Prmt9/Cpsf1/Zmat5/Zbtb7a/Wbp4/Acin1/Raly/Ccar2/Cstf1/Cpsf2/Puf60/Aar2/Eif4a3/Rbm5/Phf5a/Arl6ip4/Rnf219/Dcps/Tfip11/Cactin/Dhx36/Snrpa/Dhx9/Frg1/Pcbp4/Ddx47/Cirbp/Snrpb/Rbm22/Prpf4b/Cdc73/Ddx20/Srek1ip1/Nudt21/…
C0_cDC2	GO:0090224	regulation of spindle organization	16	1.82092	0.00940486	0.0351681	Hspa1a/Ripor2/Hspa1b
C0_cDC2	GO:0008380	RNA splicing	135	1.81932	0.000565291	0.00452233	Rbm4/Srpk2/Tia1/Clk2/Rbm3/Rbm38/Wdr83/Bud13/Snrnp48/Srsf7/Ahnak/Ppwd1/Lsm1/Zc3h10/BC005624/Prpf3/Dhx16/Prpf18/Syf2/Pnn/Scaf11/Luc7l3/Rnf113a2/Gemin7/Rtraf/Zranb2/Zmat5/Zbtb7a/Clk1/Wbp4/Acin1/Raly/Ccar2/Puf60/Aar2/Eif4a3/Rbm5/Phf5a/Arl6ip4/Rnf219/Dcps/Tfip11/Cactin/Snrpa/Dhx9/Frg1/Pcbp4/Ddx47/Cirbp/Snrpb/Rbm22/Prpf4b/Ddx20/Srek1ip1/Srsf4/Ddx39b/Scaf8/Cwf19l2/Ddx41/Dbr1/Nsrp1/Rbmxl1/Sugp2/Prpf38b/N…
C0_cDC2	GO:0034728	nucleosome organization	65	1.77346	0.00363799	0.0174783	H1f4/H4c4/H2bu2/H1f3/Smarcd1/H3c6/H1f5/H4c8/H4c3/H2aw/H2bc4/Tspyl1/Macroh2a1/Smarca2/Nap1l1/H3c7/H3c1/Ctcf/Rbbp4/H4c9/Dmap1/Rsf1/Smarcd2/Chaf1a/Tspyl2/Rnf8/Cebpg/Hat1/H4f16
C0_cDC2	GO:0045814	negative regulation of gene expression, epigenetic	38	1.77179	0.00847248	0.032516	H1f4/H1f3/Tet1/Apobec1/H1f5/Mier1/Eed/Macroh2a1/Epc1/Nrde2/Chrac1/Dnmt3b/Ppm1d/Dnmt1/Sin3a/Trim27/Trim28/Hat1/Sirt1/Spi1/Rrp8/Cdc45/Kdm1a/Bend3/Cbx8/Mphosph8
C0_cDC2	GO:0035019	somatic stem cell population maintenance	21	1.75527	0.0132798	0.0450881	Lbh/Tcf7l2/Bcl9l/Bcl9/Sox4/Hes1/Ldb1/Vangl2/Zfp36l2/Kit
C0_cDC2	GO:0006325	chromatin organization	309	1.7479	6.32058e-05	0.000751065	H1f4/H4c4/H2bu2/H1f3/Lmna/Cdk2/Ctr9/Banp/Hlcs/Snai1/Tet1/Smarcd1/H3c6/Hdac9/H3f3a/Rere/Apobec1/H1f5/Ino80b/H4c8/H4c3/Hdac3/Phc1/H2afv/Leo1/Ccnb1/Cbx4/Ttf1/Mta3/Prkcb/Mrgbp/Ppp5c/Mier1/Ldb1/Spin1/H2aw/Hmgn3/Sirt7/H2bc4/H2ac6/Loxl2/Supt4a/Tspyl1/Eed/Macroh2a1/Chd3/Hmg20a/Smarca2/Satb1/Actl6a/Nap1l1/Ncoa1/Trp53/H3c7/Elof1/Mta2/Epc1/Mcrs1/Nrde2/Prkd2/Mysm1/H3c1/Taf7/Chrac1/H2afj/Tada1/Hdac7/Trim37/Me…
C0_cDC2	GO:0065004	protein-DNA complex assembly	89	1.72639	0.00360144	0.0173652	H1f4/H4c4/H2bu2/H1f3/H3c6/H3f3a/H1f5/H4c8/H4c3/Gtf2a2/Mcm6/H2bc4/Tspyl1/Macroh2a1/Smarca2/Nap1l1/Trp53/H3c7/Thra/Cenps/Mcm3/H3c1/Taf7
C0_cDC2	GO:0006323	DNA packaging	78	1.69611	0.0053855	0.0231389	H1f4/H4c4/H2bu2/H1f3/H3c6/H3f3a/H1f5/H4c8/H4c3/Ccnb1/Dffb/H2bc4/Tspyl1/Macroh2a1/Smarca2/Nap1l1/Trp53/H3c7/Mta2
C0_cDC2	GO:0040029	regulation of gene expression, epigenetic	88	1.65953	0.00710854	0.0286765	Klf2/H1f4/H1f3/Rbm4/Tet1/Smarcd1/Rbm3/Apobec1/H1f5/Mier1/Tnrc6b/Eed/Cdyl/Macroh2a1/Zc3h10/Trp53/Elof1/Lrif1/Epc1/Gsk3a/Nrde2/Chrac1/Dnmt3b/Ctcf
C0_cDC2	GO:0071103	DNA conformation change	91	1.64399	0.00729467	0.0292611	H1f4/H4c4/H2bu2/H1f3/H3c6/H3f3a/Anxa1/H1f5/H4c8/H4c3/Ccnb1/Mcm6/Dffb/H2bc4/Tspyl1/Macroh2a1/Smarca2/Nap1l1/Trp53/H3c7/Mta2
C0_cDC2	GO:0043414	macromolecule methylation	121	1.61546	0.00676636	0.0275307	H1f4/H1f3/Lmna/Ctr9/Tet1/Trmt10c/Pcmt1/Etfbkmt/Eed/Ndufaf7/Macroh2a1/Satb1/Mto1/Mta2/Trmt44/Gsk3a/Nsun3/Eef1akmt1/Dnmt3b/Ctcf/Kdm4b/Prmt9/Tdrkh/Mettl8/Ppm1d/Ogt/Setd1b/Smyd2/Myc/Dnmt1/Setdb2/Trmt112/Thumpd3/Trmt61a/Wdr5b/Mettl6/Trim28/Mbd4/Kmt2b/Snrpb/Ntmt1/Trdmt1/Sirt1/Arid4b/Arid4a/Mepce/Phf1/Setd3/Mis18a/Spi1/Bcor/Rtf1/Trmt10a/Setd2/Pcif1/Mtf2/Rlf/Wdr61/Nelfa/Kdm1a/Hsd17b10/Prmt6/Piwil2/Bend3/…
C0_cDC2	GO:0071824	protein-DNA complex subunit organization	107	1.61053	0.00799051	0.031129	H1f4/H4c4/H2bu2/H1f3/Smarcd1/H3c6/H3f3a/H1f5/H4c8/H4c3/Gtf2a2/Mcm6/H2aw/H2bc4/Tspyl1/Macroh2a1/Smarca2/Nap1l1/Trp53/H3c7/Thra/Cenps/Mcm3/H3c1/Taf7/Ctcf/Rbbp4/H4c9/Mis12/Cenpo/Dmap1/Rsf1/Smarcd2/Myc/Ep300/Chaf1a/Tspyl2
C0_cDC2	GO:0006396	RNA processing	302	1.52609	0.00260663	0.0139528	Ctr9/Rbfa/Rbm4/Srpk2/Tia1/Clk2/Rbm3/Rbm38/Trmt10c/Apobec1/Wdr83/Papolg/Trit1/Toe1/Bud13/Leo1/Ccnb1/Pop5/Snrnp48/Srsf7/Ahnak/Ppwd1/Sephs2/Lsm1/Zc3h10/Exosc5/Kin/Trp53/Mto1/Trmt2b/BC005624/Trmt44/Prpf3/Dhx16/Prpf18/Syf2/Nsun3/Nrde2/Pnn/Scaf11/Nol11/Luc7l3/Rnf113a2/Mterf4/Rnmt/Elp6/Gemin7/Rtraf/Cdk9/Zranb2/Ctu1/Utp3/Kti12/Nol6/Trmt2a/Fars2/Prmt9/Rexo4/Cpsf1/Znhit6/Zmat5/Srfbp1/Zbtb7a/Clk1/Wbp4/Acin1…
C0_cDC2	GO:0016071	mRNA metabolic process	248	1.45971	0.0104028	0.0381212	Ctr9/Rbm4/Srpk2/Tia1/Rbm3/Rbm38/Smg6/Trmt10c/Apobec1/Wdr83/Smg9/Papolg/Gtpbp2/Bud13/Leo1/Ccnb1/Pnrc2/Snrnp48/Upf2/Srsf7/Tnrc6b/Ppwd1/Lsm1/Zc3h10/Exosc5/Kin/Trp53/Gtpbp1/BC005624/Prpf3/Dhx16/Prpf18/Syf2/Pnn/Cnot7/Scaf11/Luc7l3/Rnf113a2/Rnmt/Gemin7/E2f1/Cdk9/Polr2g/Zranb2/Zfp36l2/Prmt9/Cpsf1/Nudt16/Zmat5/Lmo2/Zbtb7a/Wbp4/Mettl8/Acin1/Raly/Ythdf3/Ccar2/Cstf1/Vim/Cpsf2/Pus3/Puf60/Aar2/Eif4a3/Rbm5/Tob…
C0_cDC2	GO:0051276	chromosome organization	456	1.43307	0.00384308	0.018221	Hspa1a/H1f4/H4c4/H2bu2/H1f3/Lmna/Tcf7l2/Cdk2/Ctr9/Banp/Hlcs/Snai1/Tet1/Smarcd1/H3c6/Hdac9/H3f3a/Rere/Smg6/Apobec1/Anxa1/H1f5/Ino80b/H4c8/H4c3/Hdac3/Phc1/H2afv/Leo1/Ccnb1/Cbx4/Ttf1/Mta3/Prkcb/Mcm6/Mrgbp/Ppp5c/Mcmbp/Dffb/Mier1/Ldb1/Spin1/H2aw/Hmgn3/Sirt7/H2bc4/H2ac6/Loxl2/Supt4a/Tspyl1/Eed/Macroh2a1/Chd3/Pttg1/Hmg20a/Smarca2/Satb1/Actl6a/Knstrn/Nap1l1/Ncoa1/Trp53/H3c7/Elof1/Mta2/Cenps/Epc1/Pot1b/Te…
C0_cDC2	GO:0048534	hematopoietic or lymphoid organ development	414	-1.38678	0.0133844	0.0451983	Ptpn2/Itgam/Il11ra1/Wnt4/Epha2/Ret/Il5/Adgrg3/Tlr2/Gata2/Hhex/Ppp2r3c/Herc6/Csf1r/Stat5a/Braf/Sh3rf1/Zbtb16/Clptm1/Cd74/Jak3/Cd81/Tgfbr2/Picalm/Armc6/Nfkbiz/Pnp/Tfe3/Ctnnbip1/Jak2/Nf1/Sbno2/Il4ra/Cd83/Slamf8/Egr1/Rbpj/Top2a/Dock7/Plscr1/Atp11c/Nfe2l2/Lfng/Cd79a/Tmem176b/Dock1/Tnfaip3/Lif/Gadd45g/Nfkbid/App/Kdr/Isg15/Flt1/Kitl/Ctla2a/Pilrb1/Bcl2a1d/Il1b/Chd7/Tnf/Csf1/Malt1/Myo1e/Ccr2/Gata3/Ets1/Cx…
C0_cDC2	GO:0009790	embryo development	371	-1.39638	0.0135413	0.0456739	Mthfd1/Lrp4/Wnt4/Epha2/Ret/Hspa5/Gata2/Hhex/Bmp2/Tjp1/Ybx3/Pkd2/Rbbp8/Exoc4/Vasp/Celf4/B4galt5/Zbtb16/Dbn1/Plcg1/Pofut1/Ext2/Tgfbr2/Bmpr2/Smpd4/Enah/Itga5/Nf1/Capn2/Fn1/Rxra/Sco2/Birc5/Txnrd3/Rbpj/Hopx/Mbtd1/Luzp1/Gnaq/Top2a/Ttc39c/Atp11a/Nfe2l2/Lfng/Tnfaip3/Lif/Pdgfb/Ets2/Wnk1/Fgfr1/Ece1/Kdr/Hipk2/Eng/Flt1/Kitl/Maff/Chd7/Ski/Atp1b1/Myo1e/Gata3/Zbtb18/Hbegf/Tgfbr1/Sema4c/Txnrd1/Sulf2/Itgb1/Skil/H…
C0_cDC2	GO:0006629	lipid metabolic process	401	-1.40019	0.0113973	0.0404099	Cd74/Plcg1/Daglb/Cd81/Hsd3b7/Dgat1/Fads1/Acod1/P2rx7/Inpp5e/Smpd4/Pgs1/Npc1/Capn2/Igf1r/Nucb2/Plppr4/Pla2g4a/Apoe/Plpp1/Egr1/Pik3r2/Acer3/Plek/Sesn2/Dhcr24/Cyp2s1/Atp1a1/Pip5k1c/Sct/Plscr1/Acot11/Hacd1/Hexb/Gdpd3/Slc27a3/App/Pdgfb/Apod/Fads2/Prkcd/Fgfr1/Nceh1/Pigu/Flt1/Lrp1/Inppl1/Il1b/Tnf/Dhrs3/Pi4k2b/Src/Adora2b/Comt/Lima1/Hrh1/Pdpn/B4galt6/Ttc39b/Nod2/Ocrl/Vdr/Aplp2/Rora/Cyp7b1/Tbxas1/Naaa/Soc…
C0_cDC2	GO:0051248	negative regulation of protein metabolic process	400	-1.40649	0.010474	0.0381852	Fam129a/Tlr4/Ptpn2/Prdm15/Cav1/Tspo/Phlpp1/Ubr5/Sco1/Hhex/Pih1d1/Cpeb4/Hipk3/Sh3rf1/Ophn1/Deptor/Jak3/Anxa8/Adora2a/Picalm/Thy1/P2rx7/Inpp5e/Nf1/Igf1r/Timp1/Apoe/Birc5/Pik3r2/Sesn2/Dhcr24/Gnaq/Laptm4b/Ddx3x/Prnp/Calr/Birc3/Tnfaip3/Prr5l/Lif/Gadd45g/Fyn/App/Apod/Prkcd/Hipk2/Cstb/Eng/Isg15/Serpina3g/Inppl1/Ctla2a/Ago4/Itm2c/Bcl2a1d/Serpina3f/Hfe/Il1b/Tnf/Hbegf/Src/Prkca/Dok2/Fcmr/Slfn1/Mllt6/Cflar/…
C0_cDC2	GO:0030097	hemopoiesis	395	-1.40893	0.0106818	0.0386448	Ptpn2/Itgam/Il11ra1/Wnt4/Epha2/Il5/Adgrg3/Tlr2/Gata2/Hhex/Ppp2r3c/Herc6/Csf1r/Stat5a/Braf/Sh3rf1/Zbtb16/Clptm1/Cd74/Jak3/Cd81/Tgfbr2/Picalm/Armc6/Nfkbiz/Pnp/Tfe3/Ctnnbip1/Jak2/Nf1/Sbno2/Il4ra/Cd83/Slamf8/Egr1/Rbpj/Top2a/Dock7/Plscr1/Atp11c/Nfe2l2/Lfng/Cd79a/Tmem176b/Dock1/Tnfaip3/Lif/Gadd45g/Nfkbid/App/Kdr/Isg15/Flt1/Kitl/Ctla2a/Pilrb1/Bcl2a1d/Il1b/Chd7/Tnf/Csf1/Malt1/Myo1e/Ccr2/Gata3/Ets1/Cxcl1/…
C0_cDC2	GO:0032269	negative regulation of cellular protein metabolic process	374	-1.41769	0.0107592	0.0386854	Fam129a/Tlr4/Ptpn2/Prdm15/Cav1/Tspo/Phlpp1/Ubr5/Sco1/Hhex/Pih1d1/Cpeb4/Hipk3/Sh3rf1/Ophn1/Deptor/Anxa8/Adora2a/Picalm/Thy1/P2rx7/Inpp5e/Nf1/Igf1r/Timp1/Apoe/Birc5/Pik3r2/Sesn2/Dhcr24/Gnaq/Laptm4b/Ddx3x/Prnp/Calr/Birc3/Tnfaip3/Prr5l/Lif/Gadd45g/Fyn/App/Prkcd/Hipk2/Cstb/Eng/Isg15/Serpina3g/Inppl1/Ctla2a/Ago4/Bcl2a1d/Serpina3f/Hfe/Il1b/Tnf/Src/Prkca/Dok2/Fcmr/Slfn1/Mllt6/Cflar/Timp2/Furin/Camk2n1/Cs…
C0_cDC2	GO:0002520	immune system development	440	-1.43381	0.00631544	0.0261075	Ptpn2/Itgam/Il11ra1/Wnt4/Mcm3ap/Phlpp1/Epha2/Ret/Il5/Adgrg3/Tlr2/Gata2/Hhex/Ppp2r3c/Herc6/Csf1r/Stat5a/Braf/Sh3rf1/Zbtb16/Clptm1/Cd74/Jak3/Cd81/Tgfbr2/Picalm/Acod1/Armc6/Nfkbiz/Pnp/Tfe3/Ctnnbip1/Jak2/Nf1/Sbno2/Il4ra/Cd83/Slamf8/Cd86/Egr1/Rbpj/Icosl/Top2a/Dock7/Plscr1/Atp11c/Nfe2l2/Lfng/Cd79a/Tmem176b/Dock1/Tnfaip3/Lif/Gadd45g/Nfkbid/App/Kdr/Isg15/Flt1/Kitl/Ctla2a/Pilrb1/Bcl2a1d/Il1b/Chd7/Tnf/Csf1…
C0_cDC2	GO:0007010	cytoskeleton organization	479	-1.44116	0.00477846	0.0212044	Rac3/Micall2/Diaph2/Tnks/Pfdn1/Sipa1l3/Htt/Myo18a/Spata7/Fmnl3/Atf5/Pclaf/Tuba1b/Cdc42bpg/Cyfip1/S100a9/Cdc42bpb/Cav1/Wnt4/Cltc/Ccl12/Cnn3/Ablim3/Vps54/Tlr2/Dpysl2/Fbxw5/Ulk4/Spef2/Ppp2r3c/Mid1/Spire1/Hdgfl3/Csf1r/Braf/Vasp/Ophn1/Sac3d1/Dbn1/Gpr35/Thy1/Pdlim5/Pdlim4/Nectin2/S1pr1/Enah/Nf1/Capn2/Nedd9/Rangrf/Nav1/Bst1/Birc5/Capg/Cdc20/Marcks/Pik3r2/Icam1/Plek/Rflnb/Palld/Eps8/Aspm/Epb41/Synpo/Pip5…
C0_cDC2	GO:0060341	regulation of cellular localization	351	-1.44449	0.00831077	0.0321124	Adrb1/Mctp1/Cyfip1/Rab11fip5/Lrp4/Cav1/Epha2/Cltc/Ubr5/Mdfic/Gata2/Ank2/Pkd2/Braf/Maged1/Ophn1/Ptpn9/Stxbp5/Dbn1/Plcg1/Cd81/Adora2a/Picalm/Thy1/P2ry1/Vhl/P2rx7/Inpp5e/Nf1/Rangrf/Il4ra/Birc5/Pik3r2/Ms4a2/Sesn2/Bag3/Cyth1/Epb41/Pip5k1c/P2ry6/Jup/Prnp/Kmo/Ralb/Cav2/Prr5l/Lif/Fyn/Oxct1/Apod/Ccdc88a/Prkcd/Xpo1/Ier3/Ngfr/F2r/Asph/Lrp1/Edem1/Hfe/Chd7/Tnf/Pls3/Ehd1/Tmbim1/Clec4b1/Src/Adora2b/Cx3cl1/Prkca…
C0_cDC2	GO:0000003	reproduction	365	-1.45076	0.00747805	0.0296615	Tnp2/Igf1r/Rxra/Timp1/Pla2g4a/Arsa/Cdc20/Txnrd3/Plau/Egr1/Icam1/Rbpj/Dhcr24/Aspm/Gnaq/Ddx3x/Top2a/Rai14/Lfng/Calr/Hexb/Lif/App/Mki67/Pdgfb/Kdr/Casp4/Insl6/Kitl/Espl1/Ago4/Il1b/Chd7/Csf1/Ptafr/Gata3/Tgfbr1/Src/Comt/Calca/Itgb1/Hif1a/Vdr/Clic4/Aplp2/Runx1/Spint1/Cyp7b1/Plat/Klf9/Mfge8/Socs3/Zmynd15/Cdc25c/Ptger4/Cdh1/Axl/Serpinb6b/Il1a/Xlr/Sh3pxd2b/Mmp12
C0_cDC2	GO:0022414	reproductive process	364	-1.45384	0.00694589	0.0281403	Tnp2/Igf1r/Rxra/Timp1/Pla2g4a/Arsa/Cdc20/Txnrd3/Plau/Egr1/Icam1/Rbpj/Dhcr24/Aspm/Gnaq/Ddx3x/Top2a/Rai14/Lfng/Calr/Hexb/Lif/App/Mki67/Pdgfb/Kdr/Casp4/Insl6/Kitl/Espl1/Ago4/Il1b/Chd7/Csf1/Ptafr/Gata3/Tgfbr1/Src/Comt/Calca/Itgb1/Hif1a/Vdr/Clic4/Aplp2/Runx1/Spint1/Cyp7b1/Plat/Klf9/Mfge8/Socs3/Zmynd15/Cdc25c/Ptger4/Cdh1/Axl/Serpinb6b/Il1a/Xlr/Sh3pxd2b/Mmp12
C0_cDC2	GO:0030162	regulation of proteolysis	255	-1.47255	0.0104433	0.0381638	Rad23b/Tank/Clu/Usp50/S100a9/Cav1/Ret/Sco1/Pih1d1/Cd55/Ctsc/Sh3rf1/Ophn1/Cycs/Anxa8/Adora2a/Picalm/Jak2/Tnp2/Timp1/Apoe/Birc5/Dhcr24/Ddx3x/Cfh/Smurf1/Birc3/Fyn/App/Ngfr/Hipk2/Casp4/F2r/Cstb/Asph/Serpina3g/Ctla2a/Edem1/Bcl2a1d/Rnf180/Serpina3f/Hfe/Il1b/Tnf/Malt1/Src/Plk2/Hip1/Fcmr/Ctnnd1/Cflar/Mmp14/Timp2/Furin/Camk2n1/Cst3/Spint1/Plat/Serpinb9/Trib1/Cdh1/Serpinb6b/Dapk1/Dab2
C0_cDC2	GO:0046649	lymphocyte activation	330	-1.47323	0.00660655	0.0269937	Clec4g/Tlr4/Ptpn2/Itgam/Cav1/Il11ra1/Wnt4/Il5/Adgrg3/Hhex/Ppp2r3c/Irs2/Stat5a/Braf/Lrrc32/Sh3rf1/Zbtb16/Clptm1/Cd74/Jak3/Cd81/Arg1/Tgfbr2/Adora2a/Thy1/Stx11/Nfkbiz/Pnp/P2rx7/Bst1/Il4ra/Cd83/Slamf8/Cd86/Egr1/Icam1/Rbpj/Icosl/Slc39a10/Atp11c/Lfng/Cd79a/Prnp/Tnfaip3/Gadd45g/Nfkbid/Fyn/Prkcd/Ctla2a/Bcl2a1d/Jaml/Hfe/Il1b/Chd7/Cd80/Malt1/Ccr2/Gata3/Itk/Il1rl2/Cd1d1/Egr3/Slfn1/Cd209e/Sema4a/Mmp14/Cd40/N…
C0_cDC2	GO:0040007	growth	361	-1.47976	0.00511031	0.0222256	Sema6d/Dbn1/Cd81/Tgfbr2/Hsd3b7/Picalm/Pdlim5/Bmpr2/Sav1/Ptprs/S1pr1/Rftn1/Fn1/Nedd9/Rxra/Apoe/Plau/Plxna4/Rbpj/Sesn2/Hopx/Aspm/Stk40/Ddx3x/Smurf1/Lpar3/Apbb2/App/P2rx5/Fgfr1/Kdr/Ptgfrn/Lrp1/Chd7/Csf1/Selenom/Gata3/Hbegf/Tgfbr1/Sec61a1/Sema4c/Src/Itgb1/Hif1a/Sema4a/Cflar/Chst11/Mmp14/Emp1/Clic4/Nrp2/Tnfrsf12a/Csf2rb/Col27a1/Olfm1/Adam15/Socs1/Afdn/Plxna1/Socs3/Socs2/Cxcl16/Cdkn1a/Dcstamp/Flrt3/Ccr…
C0_cDC2	GO:0040008	regulation of growth	253	-1.4885	0.00921969	0.0346404	Sema6d/Dbn1/Cd81/Tgfbr2/Hsd3b7/Picalm/Bmpr2/Sav1/Ptprs/Rftn1/Fn1/Nedd9/Apoe/Plxna4/Rbpj/Sesn2/Hopx/Ddx3x/Smurf1/Lpar3/Apbb2/App/P2rx5/Fgfr1/Lrp1/Chd7/Csf1/Hbegf/Tgfbr1/Sema4c/Hif1a/Sema4a/Mmp14/Tnfrsf12a/Csf2rb/Olfm1/Adam15/Socs1/Afdn/Socs3/Socs2/Cxcl16/Cdkn1a/Dcstamp/Ccr5/Ptger4/Cish/Sh3pxd2b/Dab2
C0_cDC2	GO:0010243	response to organonitrogen compound	271	-1.50486	0.00648914	0.0267062	Klhl22/Tmem129/Cyfip1/Tlr4/Ptpn2/Cav1/Rab8b/Hspa5/Uso1/Tlr2/Pkd2/Cpeb4/Irs2/Stat5a/Pde2a/Braf/Cd81/Adora2a/P2ry1/Casp7/Gatm/P2rx7/Cad/Pde4b/Jak2/Npc1/Capn2/Igf1r/Soga1/Nucb2/Apoe/Egr1/Pik3r2/Icam1/Sesn2/Nsmf/P2ry6/Jup/Prnp/Mapk13/Cav2/Tnfaip3/Fyn/App/Prkcd/Ngfr/Casp4/Asph/Lrp1/Serpina3g/Inppl1/Edem1/Hsp90b1/Serpina3f/Il1b/Tnf/Src/Ctnna1/Prkca/Hrh1/Itgb1/Nod2/Ramp3/Socs1/Socs3/Socs2/Nr4a3/Cdh1/Egr…
C0_cDC2	GO:1901698	response to nitrogen compound	295	-1.505	0.00552476	0.0236065	Klhl22/Tmem129/Cyfip1/Tlr4/Ptpn2/Cav1/Rab8b/Hspa5/Uso1/Tlr2/Pkd2/Cpeb4/Irs2/Stat5a/Pde2a/Braf/Cd81/Adora2a/P2ry1/Casp7/Gatm/P2rx7/Cad/Pde4b/Jak2/Npc1/Rftn1/Capn2/Igf1r/Soga1/Ddi2/Nucb2/Apoe/Egr1/Pik3r2/Icam1/Sesn2/Nsmf/P2ry6/Jup/Prnp/Mapk13/Ralb/Cav2/Tnfaip3/Fyn/App/Prkcd/Ngfr/Casp4/Asph/Lrp1/Serpina3g/Inppl1/Edem1/Hsp90b1/Serpina3f/Il1b/Tnf/Tlr3/Src/Ctnna1/Prkca/Hrh1/Itgb1/Cflar/Nod2/Ramp3/Socs1…
C0_cDC2	GO:0005975	carbohydrate metabolic process	188	-1.50762	0.0125706	0.0437806	Adrb1/Zmpste24/Pmm2/Ptpn2/Eno1b/Cltc/Nln/Irs2/Braf/B4galt5/Idua/Slc5a3/Pofut1/Ext2/P2ry1/P2rx7/Inpp5e/Soga1/Mogs/Galk2/Plek/Sesn2/Stk40/P2ry6/Hexb/App/Pdgfb/Apod/Ppp1r3d/Ier3/Inppl1/Fam3c/Tnf/Hk3/Ptafr/Man2a2/Src/Chst7/B4galt6/Hif1a/Chst11/Pgm2l1/Ocrl/Hk2/Rora/Phkg1/Ppp1r1a/Myof/Pfkp/Got1/Ptger4/Fabp5
C0_cDC2	GO:1902532	negative regulation of intracellular signal transduction	217	-1.53159	0.00745038	0.0296615	Bcl3/Bcl2l2/Tank/Clu/Noc2l/Rcan1/Tlr4/Ptpn2/Prdm15/Cav1/Phlpp1/Epha2/Adgrg3/Grk5/Ybx3/Pkd2/Pde2a/Hipk3/Sac3d1/Bcl2a1c/Cd74/Deptor/Bcl2a1b/Vhl/P2rx7/Inpp5e/Pde4b/Nf1/Igf1r/Nucb2/Apoe/Pik3r2/Sesn2/Ddx3x/Litaf/Nfe2l2/Prnp/Tnfaip3/Lif/Nfkbid/Hyou1/Prkcd/Inppl1/Bcl2a1d/Il1b/Wtip/Src/Prkca/Dok2/Itgb1/Cgnl1/Hif1a/Timp2/Camk2n1/Bcl2a1a/Rora/Socs1/Spred1/Socs3/Socs2/Tnip3/Il1rl1/Dab2
C0_cDC2	GO:0071407	cellular response to organic cyclic compound	146	-1.53397	0.0143449	0.0475928	Zfp703/Cav1/Ccl12/Ubr5/Bmp2/Pkd2/Stat5a/Pde2a/P2ry1/Casp7/Acod1/P2rx7/Pde4b/Jak2/Npc1/Pdia3/Egr1/Atp1a1/Zfp366/P2ry6/Jup/Calr/Ralb/App/Pdgfb/Hsp90b1/Il1b/Tnf/Tlr3/Src/Ctnna1/Hrh1/Vdr/Rora/Cyp7b1/Klf9/Ramp3/Socs1/Nr4a3/Cdh1/Dab2
C0_cDC2	GO:0051345	positive regulation of hydrolase activity	205	-1.53945	0.00740293	0.0295407	Dynll2/Psap/Rasgrp1/Ccl9/Tank/Tbc1d9/Tbc1d13/Adrb1/Usp50/S100a9/Wnt4/Epha2/Ret/Ccl12/Bmp2/Cycs/Picalm/Thy1/Jak2/S1pr1/Nf1/Nedd9/Myo9a/Icam1/Ms4a2/Plek/Snx18/Gnaq/Ddx3x/Dock7/Tbc1d9b/Plscr1/Slc39a10/Cav2/Fyn/Adap2/Prkcd/Fgfr1/Ngfr/Casp4/F2r/Asph/Flt1/Rgs16/Tnf/Malt1/Ptafr/Atp1b1/Itk/Cx3cl1/Itgb1/Hip1/Rhoc/Cd40/Ccl2/F11r/Gpr55/Afdn/Ccl24/Dapk1/Ccl22/Ccl17
C0_cDC2	GO:0023061	signal release	147	-1.54004	0.0133542	0.0451983	Unc13a/Ildr1/Sptbn2/Fam129b/Cask/Inhba/Adra2a/Htt/Nnat/Mctp1/Itsn1/Rab11fip5/Kdm5b/Rab8b/Snap23/Ffar4/Irs2/Braf/Stxbp5/Adora2a/P2ry1/Dgat1/Stx11/P2rx7/Jak2/Nf1/Nucb2/Birc5/Cyth1/Sct/Kmo/Lif/Oxct1/Fgfr1/Lrp1/Hfe/Il1b/Chd7/Tnf/Selenom/Gata3/Adora2b/Prkca/Adora3/Stx3/Hif1a/Runx1/Wls/Htr7/Il1rn/Ptger4/Dab2
C0_cDC2	GO:0006820	anion transport	150	-1.55271	0.0112819	0.0401009	Slc37a2/Slc12a7/Irs2/Arg1/Adora2a/Slc7a1/P2rx7/Nf1/Clcn7/Slco3a1/Pla2g4a/Apoe/Slc16a6/Slc4a7/Slc35b2/Slc36a1/P2ry6/Slc7a6/Atp11a/Atp11c/Slc20a1/Clcn5/Prnp/Slc25a24/Hrh2/Prelid2/Kmo/Slc2a1/Prkcd/Fgfr1/Il1b/Tnf/Ptafr/Atp10a/Prkca/Slc7a5/Clic4/Slc52a3/Stk39/Il1rn/Il1a
C0_cDC2	GO:0043549	regulation of kinase activity	297	-1.56231	0.00240793	0.013151	Fbxo7/Iqgap1/Stk3/Pik3cg/Map2k3/Map4k1/Paqr3/Cass4/Smg8/Adra2a/Vav3/Rasgrp1/Tnfrsf11a/Htt/Map4k5/Clu/Camkk1/Tlr4/Ptpn2/Cav1/Ret/Mdfic/Hhex/Pih1d1/Bmp2/Ppp2r3c/Csf1r/Pkd2/Irs2/Maged1/Hipk3/Cd74/Deptor/Cd81/Tgfbr2/Adora2a/Thy1/Ccnl1/P2rx7/Jak2/Irgm2/Nf1/Nedd9/Map3k14/Igf1r/Apoe/Slamf8/Egr1/Pik3r2/Sesn2/Gnaq/Ddx3x/Lpar3/Prnp/Ralb/Tnfaip3/Gadd45g/App/Pdgfb/Ccdc88a/Wnk1/Prkcd/Fgfr1/F2r/Flt1/Kitl/Inppl…
C0_cDC2	GO:0048608	reproductive structure development	134	-1.56246	0.0127067	0.0440084	Kdm5b/Il11ra1/Wnt4/Gata2/Ybx3/Pkd2/Stat5a/Bmpr2/Igf1r/Rxra/Pla2g4a/Icam1/Rbpj/Dhcr24/Aspm/Lfng/Lif/Pdgfb/Kdr/Insl6/Kitl/Ago4/Chd7/Gata3/Tgfbr1/Src/Hif1a/Runx1/Spint1/Cyp7b1/Socs3/Ptger4/Cdh1/Axl/Serpinb6b/Il1a
C0_cDC2	GO:0016053	organic acid biosynthetic process	131	-1.56268	0.013011	0.0446819	Hk1/Pnpla8/Scd1/Abcd3/Ggt5/Apoc2/Asns/Mthfs/Mthfd2l/Aldoc/Htt/Plod3/Acadvl/Lta4h/Mthfd1/Eno1b/Ltc4s/Cltc/Gch1/Dse/Cd74/Fads1/Gatm/P2rx7/Cad/Ass1/Pla2g4a/Aldh18a1/Acot11/Hacd1/Kmo/App/Pdgfb/Fads2/Ier3/Alox5/Il1b/Hk3/Hif1a/Hk2/Cyp7b1/Tbxas1/Pfkp/Got1/Aldh1a2/Ptger4/Fabp5
C0_cDC2	GO:0046394	carboxylic acid biosynthetic process	131	-1.56268	0.013011	0.0446819	Hk1/Pnpla8/Scd1/Abcd3/Ggt5/Apoc2/Asns/Mthfs/Mthfd2l/Aldoc/Htt/Plod3/Acadvl/Lta4h/Mthfd1/Eno1b/Ltc4s/Cltc/Gch1/Dse/Cd74/Fads1/Gatm/P2rx7/Cad/Ass1/Pla2g4a/Aldh18a1/Acot11/Hacd1/Kmo/App/Pdgfb/Fads2/Ier3/Alox5/Il1b/Hk3/Hif1a/Hk2/Cyp7b1/Tbxas1/Pfkp/Got1/Aldh1a2/Ptger4/Fabp5
C0_cDC2	GO:0009615	response to virus	114	-1.57243	0.0149236	0.0491682	Irgm2/Ifit3/Map3k14/Cd86/Ddx3x/Plscr1/Ifit1/Itgax/Oasl2/Ifit2/Isg15/Il1b/Tnf/Tlr3/Zbp1/Gbp2b/Cd40/Rsad2/Il12b/Il2ra/Gbp4/Mmp12/Cxcl10/Cxcl9
C0_cDC2	GO:0051347	positive regulation of transferase activity	213	-1.58092	0.00473777	0.0211561	Iqgap1/Stk3/Pik3cg/Map2k3/Map4k1/Cass4/Tcp1/Adra2a/Tnks/Vav3/Rasgrp1/Tnfrsf11a/Map4k5/Clu/Camkk1/Tlr4/Ret/Mdfic/Pih1d1/Bmp2/Ppp2r3c/Csf1r/Pkd2/Maged1/Cd74/Cd81/Tgfbr2/P2rx7/Jak2/Irgm2/Nedd9/Map3k14/Cdc20/Egr1/Ddx3x/Lpar3/Prnp/Ralb/Gadd45g/Pdgfb/Ccdc88a/Prkcd/Fgfr1/F2r/Flt1/Kitl/Il1b/Tnf/Csf1/Malt1/Tgfbr1/Src/Cd40/Nod2/Gadd45b/Il12b/Sdc4/Socs1/Ccnd2/Cdkn1a/Stk39/Il1rn/Trib1/Fcgr1/Trf/Dab2
C0_cDC2	GO:0043434	response to peptide hormone	109	-1.58619	0.0137185	0.0460527	Cyfip1/Ptpn2/Cav1/Rab8b/Uso1/Irs2/Stat5a/Braf/Gatm/Cad/Jak2/Igf1r/Soga1/Nucb2/Egr1/Pik3r2/Sesn2/Cav2/Prkcd/Serpina3g/Inppl1/Serpina3f/Il1b/Src/Prkca/Socs1/Socs3/Socs2/Nr4a3/Egr2/Cish
C0_cDC2	GO:0006816	calcium ion transport	134	-1.58707	0.0101296	0.0373128	Adrb1/Zmpste24/Cav1/Tspo/Ccl12/Ank2/Pkd2/Jak3/Plcg1/Gpr35/Adora2a/Thy1/P2rx7/Pde4b/Icam1/Ms4a2/Epb41/Rem1/P2ry6/Lpar3/Prnp/Orai1/Fyn/Pdgfb/Cacnb2/F2r/Asph/Chd7/Atp1b1/Kcne3/Mcub/Clec4b1/Cx3cl1/Hrh1/Cacnb3/Cysltr1/Cd84/Vdr/Ramp3/Ccr1/Ccr5/Cxcl10
C0_cDC2	GO:0001655	urogenital system development	107	-1.59102	0.0132883	0.0450881	Zmpste24/Lrp4/Wnt4/Ret/Gata2/Bmp2/Pkd2/Stat5a/Nup93/Maged1/Zbtb16/Ctnnbip1/Odc1/Nf1/Epcam/Igf1r/Rxra/Vcan/Egr1/Anxa4/Lif/Pdgfb/Fgfr1/Myo1e/Gata3/Tgfbr1/Sec61a1/Sulf2/Ctnnd1/Cflar/Nfia/C3ar1/Cyp7b1/Basp1/Aldh1a2/Mtss1
C0_cDC2	GO:0048880	sensory system development	104	-1.59513	0.0139767	0.0466986	Celf4/Tgfbr2/Thy1/Vhl/Bmpr2/Nf1/Rxra/Sco2/Slc4a7/Pde6a/Lif/Pdgfb/Kdr/Hipk2/Flt1/Nectin1/Chd7/Ski/Gata3/Tgfbr1/Bhlhe22/Skil/Hif1a/Clic4/Aldh1a2/C1qa/Sh3pxd2b
C0_cDC2	GO:0150063	visual system development	104	-1.59513	0.0139767	0.0466986	Celf4/Tgfbr2/Thy1/Vhl/Bmpr2/Nf1/Rxra/Sco2/Slc4a7/Pde6a/Lif/Pdgfb/Kdr/Hipk2/Flt1/Nectin1/Chd7/Ski/Gata3/Tgfbr1/Bhlhe22/Skil/Hif1a/Clic4/Aldh1a2/C1qa/Sh3pxd2b
C0_cDC2	GO:0043087	regulation of GTPase activity	123	-1.60042	0.0103661	0.0380359	Picalm/Thy1/Plxnd1/S1pr1/Nf1/Fgd6/Nedd9/Myo9a/Plxna4/Icam1/Snx18/Dock7/Tbc1d9b/Fgd1/Cav2/Adap2/Sbf2/Wnk1/F2r/Rgs16/Cx3cl1/Itgb1/Cd40/Ocrl/Ccl2/F11r/Afdn/Plxna1/Ccl24/Ccl22/Ccl17
C0_cDC2	GO:0010631	epithelial cell migration	103	-1.60365	0.0131298	0.0447641	Plcg1/Tgfbr2/Vhl/Plxnd1/Bmpr2/Nf1/Apoe/Arsb/Pik3r2/Nfe2l2/Jup/Calr/Dock1/Pdgfb/Fgfr1/Kdr/Gata3/Ets1/Hbegf/Tgfbr1/Src/Adora2b/Plk2/Prkca/Itgb1/Egr3/Hif1a/Sema4a/Cd40/Cd63/Spred1
C0_cDC2	GO:0090130	tissue migration	103	-1.60365	0.0131298	0.0447641	Plcg1/Tgfbr2/Vhl/Plxnd1/Bmpr2/Nf1/Apoe/Arsb/Pik3r2/Nfe2l2/Jup/Calr/Dock1/Pdgfb/Fgfr1/Kdr/Gata3/Ets1/Hbegf/Tgfbr1/Src/Adora2b/Plk2/Prkca/Itgb1/Egr3/Hif1a/Sema4a/Cd40/Cd63/Spred1
C0_cDC2	GO:0090132	epithelium migration	103	-1.60365	0.0131298	0.0447641	Plcg1/Tgfbr2/Vhl/Plxnd1/Bmpr2/Nf1/Apoe/Arsb/Pik3r2/Nfe2l2/Jup/Calr/Dock1/Pdgfb/Fgfr1/Kdr/Gata3/Ets1/Hbegf/Tgfbr1/Src/Adora2b/Plk2/Prkca/Itgb1/Egr3/Hif1a/Sema4a/Cd40/Cd63/Spred1
C0_cDC2	GO:0006869	lipid transport	94	-1.60381	0.0145629	0.0482036	Apoc2/Inhba/Sgpp1/Psap/Tnfrsf11a/Kdm5b/Cav1/Tspo/Plekha8/Irs2/Dgat1/P2rx7/Npc1/Slco3a1/Nucb2/Pla2g4a/Apoe/Atp11a/Atp11c/Hrh2/Prelid2/Esyt1/Apod/Prkcd/Lrp1/Il1b/Selenom/Atp10a/Lima1/Abca9/Ttc39b/Runx1/Il1a/Dab2
C0_cDC2	GO:0061458	reproductive system development	136	-1.60749	0.00809106	0.0314283	Kdm5b/Il11ra1/Wnt4/Gata2/Ybx3/Pkd2/Stat5a/Bmpr2/Igf1r/Rxra/Pla2g4a/Icam1/Rbpj/Dhcr24/Aspm/Lfng/Lif/Pdgfb/Kdr/Insl6/Kitl/Ago4/Chd7/Gata3/Tgfbr1/Src/Hif1a/Runx1/Plekha5/Spint1/Cyp7b1/Socs3/Ptger4/Cdh1/Axl/Serpinb6b/Il1a
C0_cDC2	GO:0051235	maintenance of location	121	-1.60871	0.00945074	0.0351918	Ptpn2/Cav1/Tspo/Hspa5/Srgn/Ank2/Pkd2/Stat5a/Dbn1/Plcg1/Thy1/Dgat1/P2rx7/Apoe/Ms4a2/Aspm/Pip5k1c/Hilpda/P2ry6/Hexb/F2r/Asph/Il1b/Chd7/Tnf/Ehd1/Scin/Clec4b1/Cx3cl1/Ttc39b/Hk2/Syne2/Slc30a4/Ccr5/Cxcl10
C0_cDC2	GO:0052548	regulation of endopeptidase activity	114	-1.61131	0.010565	0.038442	Usp50/S100a9/Ret/Pih1d1/Sh3rf1/Cycs/Anxa8/Adora2a/Picalm/Jak2/Timp1/Birc5/Dhcr24/Ddx3x/Birc3/Fyn/Ngfr/Casp4/F2r/Asph/Serpina3g/Bcl2a1d/Serpina3f/Tnf/Malt1/Src/Hip1/Fcmr/Cflar/Timp2/Furin/Serpinb9/Cdh1/Serpinb6b/Dapk1
C0_cDC2	GO:0001818	negative regulation of cytokine production	132	-1.61463	0.00823455	0.0318759	Tlr4/Tspo/Epha2/Ubr5/Ffar4/Tlr2/Srgn/Lrrc32/Jak3/Arg1/Acod1/Ptprs/Fn1/Cd83/Laptm4b/Anxa4/Mc1r/Prnp/Tnfaip3/Apod/Fgfr1/Hfe/Tnf/Gata3/Cx3cl1/Cd84/Nod2/Furin/Cd274/Il12b/Scgb1a1/Pdcd1lg2/Gbp4/Tnfrsf9/Cd200r1/Ptger4/Axl/Il1rl1/Fcgr2b
C0_cDC2	GO:0010817	regulation of hormone levels	146	-1.61786	0.00673654	0.0274487	Cask/Inhba/Adra2a/Htt/Nnat/Itsn1/Zmpste24/Rab11fip5/Kdm5b/Rab8b/Wnt4/Snap23/Ffar4/Bmp2/Irs2/Adora2a/P2ry1/Dgat1/Jak2/Igf1r/Nucb2/Birc5/Egr1/Cyp2s1/Atp1a1/Sct/Lif/Oxct1/Fgfr1/Ece1/Lrp1/Hfe/Il1b/Chd7/Tnf/Dhrs3/Selenom/Gata3/Comt/Adora3/Hif1a/Vdr/Furin/Runx1/Cpq/Aldh1a2/Il1rn/Ptger4/Dab2
C0_cDC2	GO:0072659	protein localization to plasma membrane	102	-1.61913	0.0113143	0.0401657	Rab8b/Epha2/Cltc/Ank2/Ptpn9/Tmem88/Cd81/Picalm/P2ry1/Rangrf/Pik3r2/Fcho2/Jup/Prnp/Cacnb2/Lrp1/Tnf/Atp1b1/Tmbim1/Itgb1/Cacnb3/Stx3/Mmp14/Rap2a/F11r/Ramp3/Afdn/Cdh1/Dab2
C0_cDC2	GO:0002521	leukocyte differentiation	267	-1.62426	0.00153814	0.00933399	Ptpn2/Itgam/Il11ra1/Wnt4/Epha2/Il5/Adgrg3/Tlr2/Gata2/Hhex/Ppp2r3c/Csf1r/Stat5a/Braf/Sh3rf1/Zbtb16/Clptm1/Cd74/Jak3/Cd81/Tgfbr2/Nfkbiz/Pnp/Tfe3/Ctnnbip1/Nf1/Sbno2/Il4ra/Cd83/Slamf8/Egr1/Rbpj/Atp11c/Lfng/Cd79a/Tmem176b/Tnfaip3/Lif/Gadd45g/Nfkbid/App/Kitl/Ctla2a/Pilrb1/Bcl2a1d/Il1b/Chd7/Tnf/Csf1/Malt1/Ccr2/Gata3/Itk/Src/Il1rl2/Prkca/Cd1d1/Egr3/Sema4a/Mmp14/Tnfsf9/Rsad2/C1qc/Runx1/Rora/Tjp2/Tmem176a/…
C0_cDC2	GO:0010038	response to metal ion	89	-1.62872	0.0127671	0.0441101	Gatm/P2rx7/Ass1/Npc1/Fn1/Crip1/Pla2g4a/Nfe2l2/Prnp/Slc25a24/Wnk1/Asph/Hfe/Cpne2/Slc41a1/Clic4/Mt1/Slc30a4/Cdh1/Trf/Il1a/Mt2
C0_cDC2	GO:0045859	regulation of protein kinase activity	273	-1.63098	0.00132572	0.00842295	Shc1/Map3k20/Actb/Fbxo7/Iqgap1/Stk3/Pik3cg/Map2k3/Map4k1/Paqr3/Cass4/Smg8/Adra2a/Rasgrp1/Tnfrsf11a/Htt/Map4k5/Clu/Camkk1/Tlr4/Ptpn2/Cav1/Ret/Mdfic/Hhex/Pih1d1/Bmp2/Ppp2r3c/Csf1r/Pkd2/Maged1/Hipk3/Cd74/Deptor/Cd81/Tgfbr2/Adora2a/Thy1/Ccnl1/P2rx7/Jak2/Irgm2/Nf1/Nedd9/Map3k14/Igf1r/Apoe/Egr1/Sesn2/Gnaq/Ddx3x/Lpar3/Prnp/Ralb/Tnfaip3/Gadd45g/App/Pdgfb/Ccdc88a/Prkcd/Fgfr1/F2r/Flt1/Kitl/Inppl1/Il1b/Tnf/…
C0_cDC2	GO:0002253	activation of immune response	177	-1.63122	0.00386945	0.0182844	Tlr4/Ptpn2/Cav1/Tlr2/Skint3/Cd55/Braf/Plcg1/Cd81/Thy1/Acod1/Nfkbiz/Ptprs/Pde4b/Nectin2/Irgm2/Rftn1/Cd86/Icosl/Plscr1/Cfh/Slc39a10/Cd79a/Prnp/Cfp/Ifi204/Tnfaip3/Nfkbid/Fyn/Wnk1/Cfb/Bcl2a1d/Il1b/Tnf/Malt1/Gata3/Itk/Ifi211/Tlr3/Cacnb3/C3ar1/Nod2/Rsad2/C1qc/Cd226/Cd14/Ifi205/C1qb/Nr4a3/C1qa/Tnip3/Fcgr2b
C0_cDC2	GO:0035690	cellular response to drug	119	-1.63169	0.00792904	0.0310335	Acod1/Pde4b/Jak2/Pde8a/Ddi2/Slamf8/Egr1/Nfe2l2/Jup/Prnp/Mapk13/Tnfaip3/Fyn/Pdgfb/Prkcd/Kdr/Hsp90b1/Il1b/Tnf/Hk3/Src/Ctnna1/Cflar/Nod2/Klf9/Rap2a/Adam15/Nr4a3/Cdh1/Axl
C0_cDC2	GO:0010035	response to inorganic substance	156	-1.63475	0.00496112	0.0217768	Gatm/P2rx7/Ass1/Pde8a/Npc1/Fn1/Crip1/Ddi2/Pla2g4a/Nfe2l2/Prnp/Slc25a24/Mapk13/Tnfaip3/Fyn/Wnk1/Prkcd/Kdr/Asph/Hfe/Tnf/Hk3/Selenom/Cpne2/Slc41a1/Src/Cflar/Clic4/Mt1/Slc30a4/Nr4a3/Cdh1/Trf/Axl/Il1a/Mt2
C0_cDC2	GO:0042110	T cell activation	231	-1.63506	0.00233713	0.0129133	Stat5a/Braf/Lrrc32/Sh3rf1/Zbtb16/Clptm1/Cd74/Jak3/Cd81/Arg1/Tgfbr2/Adora2a/Thy1/Stx11/Nfkbiz/Pnp/P2rx7/Il4ra/Cd83/Cd86/Egr1/Icam1/Icosl/Lfng/Prnp/Gadd45g/Nfkbid/Fyn/Ctla2a/Bcl2a1d/Jaml/Hfe/Il1b/Chd7/Cd80/Malt1/Ccr2/Gata3/Itk/Il1rl2/Cd1d1/Egr3/Slfn1/Cd209e/Sema4a/Tnfsf9/Rsad2/Treml2/Runx1/Cd274/Rora/Il12b/Ccl2/Sdc4/Scgb1a1/Il2ra/Pdcd1lg2/Il7r/Socs1/Aif1/Ptger4/Cd209a
C0_cDC2	GO:0050769	positive regulation of neurogenesis	187	-1.63735	0.00361844	0.0174176	Itsn1/Cyfip1/S100a9/Il1rap/Tspo/Ret/Hspa5/Tlr2/Gata2/Bmp2/Braf/Scn1b/Dbn1/Picalm/Plxnd1/Bmpr2/Nf1/Fn1/Igf1r/Apoe/Arsb/Plxna4/Nsmf/Aspm/D16Ertd472e/Smurf1/Lpar3/Nfe2l2/Lif/Fyn/Fgfr1/Kdr/Ngfr/Lrp1/Il1b/Tnf/Csf1/Ccr2/Ehd1/Cx3cl1/Itgb1/Skil/Hif1a/Cflar/Timp2/Tubb2b/Spint1/Tnfrsf12a/Afdn/Plxna1/Socs2/Htr7/Ccr5/Trf
C0_cDC2	GO:0016049	cell growth	190	-1.63922	0.0035212	0.0171236	Sema6d/Dbn1/Cd81/Tgfbr2/Hsd3b7/Picalm/Pdlim5/Bmpr2/Ptprs/Fn1/Apoe/Plxna4/Sesn2/Ddx3x/Smurf1/Lpar3/Apbb2/App/Lrp1/Hbegf/Tgfbr1/Sec61a1/Sema4c/Itgb1/Sema4a/Mmp14/Emp1/Nrp2/Tnfrsf12a/Csf2rb/Olfm1/Adam15/Afdn/Plxna1/Socs2/Cxcl16/Cdkn1a/Dcstamp/Flrt3/Ccr5/Dab2
C0_cDC2	GO:0046631	alpha-beta T cell activation	91	-1.64188	0.0109375	0.0391215	Braf/Sh3rf1/Zbtb16/Jak3/Cd81/Tgfbr2/Adora2a/Nfkbiz/Pnp/Il4ra/Cd83/Gadd45g/Nfkbid/Hfe/Cd80/Malt1/Ccr2/Gata3/Itk/Cd1d1/Sema4a/Rsad2/Runx1/Cd274/Rora/Il12b/Socs1/Ptger4
C0_cDC2	GO:0097190	apoptotic signaling pathway	253	-1.648	0.00140509	0.00873184	Htt/Aen/Bcl3/Bcl2l2/Sept4/Clu/Noc2l/S100a9/Ptpn2/Cav1/Wnt4/Epha2/Ret/Pih1d1/Bcl2l14/Ybx3/Ctsc/Maged1/Sh3rf1/Hic1/Mybbp1a/Bcl2a1c/Cd74/Deptor/Jak3/Adora2a/Bcl2a1b/Slc35f6/Vhl/Pnp/P2rx7/Jak2/Nf1/Crip1/Pdia3/Icam1/Bag3/Ddx3x/Plscr1/Nfe2l2/Chchd10/Ifi204/Tnfaip3/Fyn/Hyou1/Prkcd/Fgfr1/Ier3/Ngfr/Hipk2/Casp4/Kitl/Itm2c/Bcl2a1d/Il1b/Tnf/Tgfbr1/Tmbim1/Tlr3/Src/Ctnna1/Cx3cl1/Prkca/Hip1/Tnfsf12/Skil/Fcmr/Hi…
C0_cDC2	GO:0048588	developmental cell growth	90	-1.65139	0.0104205	0.0381368	Sema6d/Dbn1/Tgfbr2/Picalm/Pdlim5/Bmpr2/Ptprs/Fn1/Apoe/Plxna4/Smurf1/Lpar3/App/Lrp1/Sema4c/Itgb1/Sema4a/Nrp2/Tnfrsf12a/Olfm1/Afdn/Plxna1/Flrt3/Ccr5
C0_cDC2	GO:0048732	gland development	141	-1.65175	0.00501179	0.0219652	Psap/Tnfrsf11a/Mafb/Zmpste24/Zfp703/Kdm5b/Cav1/Wnt4/Epha2/Gata2/Hhex/Bmp2/Pkd2/Irs2/Stat5a/Braf/Tgfbr2/Plxnd1/Jak2/Nf1/Igf1r/Rxra/Plau/Rbpj/Hrh2/Orai1/Tnfaip3/Mki67/Pdgfb/Fgfr1/Tnf/Csf1/Gata3/Tgfbr1/Src/Sulf2/Ctnnd1/Hif1a/Cflar/Vdr/Runx1/Cyp7b1/Wls/Plxna1/Socs2/Cdh1
C0_cDC2	GO:0070997	neuron death	149	-1.65423	0.00462204	0.0206718	Adora2a/Picalm/Cxcl2/Casp7/Jak2/Nf1/Capn2/Apoe/Birc5/Plau/Egr1/Nsmf/Nqo2/Sct/Prnp/Kmo/Fyn/App/Hyou1/Kdr/Ngfr/Hipk2/F2r/Lrp1/Trim2/Il1b/Tnf/Csf1/Gata3/Cx3cl1/Hif1a/Cd200r1/Mt1/Nr4a3/C1qa/Ccr5/Axl/Fcgr2b
C0_cDC2	GO:0045619	regulation of lymphocyte differentiation	96	-1.65876	0.00924558	0.0346404	Ppp2r3c/Stat5a/Braf/Sh3rf1/Zbtb16/Clptm1/Cd74/Jak3/Tgfbr2/Nfkbiz/Pnp/Il4ra/Cd83/Slamf8/Atp11c/Nfkbid/Ctla2a/Il1b/Malt1/Ccr2/Gata3/Il1rl2/Cd1d1/Egr3/Mmp14/Tnfsf9/Runx1/Il2ra/Il7r/Socs1/Axl
C0_cDC2	GO:1901615	organic hydroxy compound metabolic process	158	-1.66259	0.00358451	0.0173308	Gch1/Bmp2/Sec14l2/Slc37a2/Slc5a3/Plcg1/Hsd3b7/P2ry1/Vhl/Inpp5e/Npr1/Npc1/Apoe/Plpp1/Acer3/Plek/Dhcr24/P2ry6/Mc1r/App/Fgfr1/Lrp1/Inppl1/Rnf180/Il1b/Tnf/Dhrs3/Ptafr/Gata3/Comt/Lima1/Ddt/Hif1a/Ttc39b/Ocrl/Vdr/Aplp2/Cyp7b1/Cpq/Naaa/Myof/Got1/Dab2
C0_cDC2	GO:0052547	regulation of peptidase activity	133	-1.66475	0.00484329	0.0213918	Usp50/S100a9/Cav1/Ret/Pih1d1/Sh3rf1/Cycs/Anxa8/Adora2a/Picalm/Jak2/Timp1/Birc5/Dhcr24/Ddx3x/Birc3/Fyn/App/Ngfr/Casp4/F2r/Cstb/Asph/Serpina3g/Bcl2a1d/Serpina3f/Tnf/Malt1/Src/Hip1/Fcmr/Cflar/Timp2/Furin/Cst3/Spint1/Serpinb9/Cdh1/Serpinb6b/Dapk1
C0_cDC2	GO:0032970	regulation of actin filament-based process	143	-1.66754	0.00434119	0.019843	Adrb1/Cyfip1/Cav1/Wnt4/Tlr2/Spire1/Csf1r/Ank2/Braf/Vasp/Dbn1/Pde4b/Pdlim4/S1pr1/Rangrf/Bst1/Capg/Pik3r2/Icam1/Plek/Eps8/Atp1a1/Synpo/Jup/Ccdc88a/Prkcd/Lrp1/Kcne3/Tgfbr1/Scin/Fscn1/Lima1/Cx3cl1/Pdpn/Rhoc/Arhgap18/Sdc4/F11r/Ccl24/Mtss1/Ptger4/Il1a/Sh3pxd2b
C0_cDC2	GO:0010876	lipid localization	111	-1.67074	0.00614981	0.0255717	Apoc2/Inhba/Sgpp1/Hexa/Psap/Tnfrsf11a/Ptpn2/Kdm5b/Cav1/Tspo/Plekha8/Irs2/Stat5a/Dgat1/P2rx7/Npc1/Slco3a1/Nucb2/Pla2g4a/Apoe/Hilpda/Atp11a/Atp11c/Hrh2/Prelid2/Hexb/Esyt1/Apod/Prkcd/Lrp1/Il1b/Tnf/Selenom/Atp10a/Ehd1/Lima1/Abca9/Ttc39b/Runx1/Il1a/Dab2
C0_cDC2	GO:0051336	regulation of hydrolase activity	352	-1.67293	0.000340819	0.0030411	Dynll2/Psap/Vav3/Rasgrp1/Htt/Ccl9/Tank/Tbc1d9/Tbc1d13/Adrb1/Usp50/Rcan1/S100a9/Cav1/Wnt4/Epha2/Ret/Ccl12/Cnn3/Pih1d1/Bmp2/Sh3rf1/Cycs/Dbn1/Anxa8/Adora2a/Picalm/Thy1/Plxnd1/Jak2/S1pr1/Nf1/Fgd6/Nedd9/Timp1/Myo9a/Vcan/Birc5/Plxna4/Icam1/Ms4a2/Plek/Dhcr24/Snx18/Gnaq/Ddx3x/Dock7/Tbc1d9b/Plscr1/Slc39a10/Fgd1/Oasl2/Birc3/Cav2/Fyn/App/Adap2/Sbf2/Wnk1/Prkcd/Fgfr1/Ngfr/Casp4/F2r/Cstb/Asph/Flt1/Rgs16/Lrp1/S…
C0_cDC2	GO:0008360	regulation of cell shape	64	-1.67306	0.0132087	0.0449253	Fmnl3/Zmpste24/Cyfip1/Ccl12/Csf1r/P2ry1/Plxnd1/Fn1/Plxna4/Icam1/Eps8/Epb41/Fgd1/Gas7/Hexb/Fyn/Kdr/Fmnl2/Parvb/Pdpn/Rhoc/Sema4a/Arhgap18/Ccl2/Plxna1/Ccl24
C0_cDC2	GO:0007610	behavior	188	-1.67879	0.0023069	0.0127711	Lgi4/Pomk/Hexa/Psap/Htt/Adrb1/Zmpste24/Klk8/Rcan1/Tspo/Tlr2/Spire1/Braf/Idua/Dbn1/Adora2a/Picalm/P2ry1/Dgat1/Gatm/Npc1/Itga5/Nf1/Capn2/Zfhx3/Pbx3/Apoe/Egr1/Eps8/Gnaq/Synpo/Sct/Mc1r/Prnp/Hrh2/Hexb/App/Hipk2/Cstb/Rnf180/Il1b/Chd7/Comt/Plk2/Prkca/Calca/Hrh1/Itgb1/Hif1a/Nav2/Aplp2/Runx1/Cyp7b1/Ccnd2/Htr7/Il1rn/Nr4a3/Ptger4/Egr2
C0_cDC2	GO:0008202	steroid metabolic process	93	-1.67911	0.00765911	0.0301272	Tspo/Wnt4/Bmp2/Sec14l2/Stat5a/Hsd3b7/Npc1/Igf1r/Apoe/Egr1/Dhcr24/Atp1a1/App/Fgfr1/Lrp1/Il1b/Tnf/Adora2b/Comt/Lima1/Hrh1/Ttc39b/Vdr/Aplp2/Rora/Cyp7b1/Il1a/Dab2
C0_cDC2	GO:1903531	negative regulation of secretion by cell	86	-1.68007	0.00863016	0.0330319	Entpd1/Rab11fip5/Ubr5/Ffar4/Srgn/Braf/Lrrc32/Idua/P2ry1/Nf1/Fn1/Nucb2/Apoe/Anxa4/Tnfaip3/Lif/F2r/Il1b/Tnf/Ccr2/Cx3cl1/Cd84/Rsad2/Tnfrsf9/Htr7/Cd200r1/Il1rn/Ptger4
C0_cDC2	GO:0010720	positive regulation of cell development	218	-1.6822	0.00141519	0.00877544	Adrb1/Itsn1/Cyfip1/S100a9/Il1rap/Tspo/Ret/Il5/Hspa5/Tlr2/Gata2/Bmp2/Braf/Scn1b/Dbn1/Picalm/Plxnd1/Bmpr2/Nf1/Fn1/Nedd9/Igf1r/Apoe/Arsb/Plxna4/Nsmf/Aspm/D16Ertd472e/Smurf1/Lpar3/Nfe2l2/Calr/Dock1/Lif/Fyn/Fgfr1/Kdr/Ngfr/Lrp1/Il1b/Tnf/Csf1/Ccr2/Ehd1/Cx3cl1/Itgb1/Skil/Hif1a/Cflar/Timp2/Tubb2b/Runx1/Spint1/Tnfrsf12a/Afdn/Plxna1/Socs2/Htr7/Trib1/Ccr5/Trf/Dab2
C0_cDC2	GO:0050770	regulation of axonogenesis	71	-1.68574	0.0108317	0.0388902	Zswim6/Cyfip1/Lrp4/Ret/Dpysl2/Braf/Sema6d/Dbn1/Picalm/Thy1/Plxnd1/Bmpr2/Ptprs/Fn1/Apoe/Plxna4/Lpar3/Lrp1/Sema4c/Skil/Sema4a/Tubb2b/Tnfrsf12a/Olfm1/Plxna1/Ccr5
C0_cDC2	GO:0045596	negative regulation of cell differentiation	266	-1.68638	0.000692867	0.00519193	Ccl9/Mafb/Zadh2/Atf5/Klk8/Ptpn2/Lrp4/Cav1/Tspo/Wnt4/Gata2/Bmp2/Stat5a/Ptpn9/Zbtb16/Cd74/Sema6d/Jak3/Thy1/Vhl/Ttc3/Ptprs/Nf1/Il4ra/Ltbp3/Zfhx3/Nucb2/Apoe/Rbpj/Rflnb/Hopx/Aspm/Nfe2l2/Fndc3b/Tmem176b/Calr/Nfkbid/App/Pdgfb/Fgfr1/Ngfr/Lrp1/Inppl1/Pilrb1/Itm2c/Il1b/Tnf/Ski/Gata3/Tgfbr1/Sema4c/Iqcb1/Ctnna1/Plk2/Itgb1/Skil/Sema4a/Cflar/Gpr171/C1qc/Runx1/Rora/Tjp2/Tmem176a/Trio/Gpr55/Olfm1/Socs1/Trib1/Ccr…
C0_cDC2	GO:0070838	divalent metal ion transport	151	-1.68727	0.00298219	0.0153989	Cnnm4/Adrb1/Zmpste24/Cav1/Tspo/Ccl12/Ank2/Pkd2/Jak3/Plcg1/Gpr35/Adora2a/Thy1/Slc39a11/P2rx7/Pde4b/Nipal1/Icam1/Ms4a2/Epb41/Rem1/P2ry6/Slc39a10/Lpar3/Prnp/Orai1/Fyn/Pdgfb/Cacnb2/F2r/Asph/Chd7/Atp1b1/Kcne3/Slc41a1/Mcub/Clec4b1/Cx3cl1/Hrh1/Cacnb3/Cysltr1/Cd84/Vdr/Ramp3/Ccr1/Slc30a4/Ccr5/Cxcl10
C0_cDC2	GO:1903706	regulation of hemopoiesis	204	-1.69053	0.00151943	0.00926005	Gata2/Ppp2r3c/Csf1r/Stat5a/Braf/Sh3rf1/Zbtb16/Clptm1/Cd74/Jak3/Tgfbr2/Nfkbiz/Pnp/Tfe3/Ctnnbip1/Nf1/Il4ra/Cd83/Slamf8/Atp11c/Nfe2l2/Tmem176b/Lif/Nfkbid/Kdr/Isg15/Flt1/Kitl/Ctla2a/Pilrb1/Il1b/Tnf/Csf1/Malt1/Ccr2/Gata3/Ets1/Cxcl1/Scin/Il1rl2/Prkca/Cd1d1/Egr3/Hif1a/Mmp14/Gpr171/Tnfsf9/C1qc/Runx1/Tjp2/Tmem176a/Il12b/Gpr55/Il2ra/Il7r/Socs1/Dcstamp/Trib1/Ccr1/Axl
C0_cDC2	GO:0002064	epithelial cell development	85	-1.69228	0.00794022	0.0310335	Slc4a7/Icam1/Palld/Hrh2/Pdgfb/Fgfr1/Eng/Il1b/Tnf/Myo1e/Hif1a/Clic4/Fosl2/Tjp2/F11r/Afdn/Cdh1/Il1a/Cldn1
C0_cDC2	GO:0002683	negative regulation of immune system process	220	-1.69677	0.00122065	0.00784307	Nfe2l2/Tmem176b/Prnp/Tnfaip3/Nfkbid/Apod/Kitl/Pilrb1/Hfe/Tnf/Cd80/Ccr2/Cx3cl1/Ddt/Slfn1/Cd84/Gpr171/Nod2/C1qc/Runx1/Cd274/Tjp2/Tmem176a/Il12b/Serpinb9/Sdc4/Klrb1b/Scgb1a1/Gpr55/Il2ra/Pdcd1lg2/Il7r/Socs1/Cd200r1/Trib1/Ccr1/Ptger4/Axl/Il1rl1/Fcgr2b/Mmp12
C0_cDC2	GO:0030855	epithelial cell differentiation	182	-1.69824	0.00187742	0.0108895	Wnt10b/Sgpp1/Psap/Sipa1l3/Plod3/Kdm6b/Apold1/Zfp703/Cav1/Wnt4/Epha2/Hhex/Bmp2/Tjp1/Stat5a/Pde2a/Ophn1/Vhl/Bmpr2/Sav1/Ptprs/Rxra/Myo9a/Slc4a7/Icam1/Rbpj/Palld/Anxa4/Fndc3b/Hrh2/Lif/Pdgfb/Fgfr1/Kdr/Eng/Maff/Il1b/Tnf/Myo1e/Gata3/Tgfbr1/Skil/Pdpn/Ctnnd1/Ehf/Hif1a/Vdr/Clic4/Fosl2/Tjp2/F11r/Basp1/Cd63/Afdn/Mtss1/Cdh1/Il1a/Cldn1/Dab2
C0_cDC2	GO:0045861	negative regulation of proteolysis	105	-1.69984	0.005297	0.0228624	Sco1/Pih1d1/Sh3rf1/Ophn1/Anxa8/Adora2a/Picalm/Timp1/Birc5/Dhcr24/Ddx3x/Birc3/App/Hipk2/Cstb/Serpina3g/Ctla2a/Bcl2a1d/Serpina3f/Hfe/Src/Fcmr/Cflar/Timp2/Camk2n1/Cst3/Spint1/Plat/Serpinb9/Cdh1/Serpinb6b
C0_cDC2	GO:0007548	sex differentiation	75	-1.70119	0.00887507	0.0337419	Pla2g4a/Icam1/Dhcr24/Aspm/Lfng/Kdr/Insl6/Kitl/Ago4/Chd7/Gata3/Tgfbr1/Src/Runx1/Ptger4/Axl/Serpinb6b/Il1a
C0_cDC2	GO:0002367	cytokine production involved in immune response	56	-1.70301	0.012371	0.0432147	Hfe/Il1b/Tnf/Malt1/Ccr2/Gata3/Tlr3/Arid5a/Nod2/Rsad2/Cd226/Il12b/Nr4a3
C0_cDC2	GO:0019882	antigen processing and presentation	53	-1.7056	0.0130112	0.0446819	H2-DMa/Rab27a/H2-Aa/Atg5/H2-Eb1/March1/Rab6a/Ifi30/Ap3b1/Psme2/March8/H2-DMb2/H2-Ab1/H2-DMb1/Tap1/Mfsd6/Rab8b/Tapbp/Cd74/Ctss/Rftn1/Icam1/Erap1/Calr/Hfe/Cd1d1/Nod2/Fcgr3/Fcgr1/Fcgr2b
C0_cDC2	GO:0072511	divalent inorganic cation transport	152	-1.70714	0.00236943	0.0130411	Cnnm4/Tcn2/Adrb1/Zmpste24/Cav1/Tspo/Ccl12/Ank2/Pkd2/Jak3/Plcg1/Gpr35/Adora2a/Thy1/Slc39a11/P2rx7/Pde4b/Nipal1/Icam1/Ms4a2/Epb41/Rem1/P2ry6/Slc39a10/Lpar3/Prnp/Orai1/Fyn/Pdgfb/Cacnb2/F2r/Asph/Chd7/Atp1b1/Kcne3/Slc41a1/Mcub/Clec4b1/Cx3cl1/Hrh1/Cacnb3/Cysltr1/Cd84/Vdr/Ramp3/Ccr1/Slc30a4/Ccr5/Cxcl10
C0_cDC2	GO:0045580	regulation of T cell differentiation	78	-1.70749	0.0079691	0.0310883	Stat5a/Braf/Sh3rf1/Zbtb16/Clptm1/Cd74/Jak3/Tgfbr2/Nfkbiz/Pnp/Il4ra/Cd83/Nfkbid/Ctla2a/Il1b/Malt1/Ccr2/Gata3/Il1rl2/Cd1d1/Egr3/Tnfsf9/Runx1/Il2ra/Il7r/Socs1
C0_cDC2	GO:0015850	organic hydroxy compound transport	51	-1.70755	0.0140036	0.0467334	Entpd1/Kdm5b/Cav1/Aqp3/Slc5a3/Adora2a/P2ry1/Npc1/Nucb2/Apoe/Lrp1/Selenom/Adora2b/Lima1/Ttc39b/Fcgr3/Htr7/Dab2
C0_cDC2	GO:0018212	peptidyl-tyrosine modification	127	-1.70779	0.0033342	0.0166275	Tlr4/Ptpn2/Lrp4/Cav1/Il5/Csf1r/Stat5a/Cd74/Jak3/Cd81/Thy1/Jak2/Itga5/Nedd9/Igf1r/Bst1/Icam1/Prnp/Cav2/Lif/Fyn/App/Pdgfb/Prkcd/Fgfr1/Kdr/Flt1/Kitl/Tnf/Cd80/Itk/Hbegf/Src/Prkca/Itgb1/Ctnnd1/Cd40/Nod2/Aplp2/Il12b/Socs1/Socs3/Fcgr1/Ptger4
C0_cDC2	GO:0002718	regulation of cytokine production involved in immune response	47	-1.70947	0.0141837	0.0472234	Tlr4/Tlr2/Cd74/Jak3/Cd81/Arg1/Hfe/Il1b/Tnf/Malt1/Ccr2/Gata3/Tlr3/Arid5a/Nod2/Rsad2/Cd226/Nr4a3
C0_cDC2	GO:0009887	animal organ morphogenesis	276	-1.71016	0.000479727	0.00396053	Kdm5b/Lrp4/Cav1/Wnt4/Epha2/Gata2/Spef2/Hhex/Bmp2/Pkd2/Stat5a/Exoc4/Maged1/Idua/Tgfbr2/Thy1/Vhl/Plxnd1/Bmpr2/P2rx7/Ctnnbip1/Sav1/S1pr1/Nf1/Igf1r/Rxra/Ltbp3/Slc4a7/Plau/Rbpj/Rflnb/Stk40/Ttc39c/Hacd1/Tnfaip3/Lif/Mki67/Pdgfb/Fgfr1/Kdr/Ngfr/Hipk2/Eng/Flt1/Inppl1/Nectin1/Chd7/Tnf/Dhrs3/Csf1/Ski/Gata3/Tgfbr1/Src/Sulf2/Bhlhe22/Csrnp1/Ctnnd1/Alpk2/Hif1a/Cflar/Chst11/Mmp14/Adgrg6/Vdr/Nrp2/Cyp7b1/Col27a1/Ad…
C0_cDC2	GO:0042098	T cell proliferation	94	-1.71193	0.00595479	0.0249434	H2-Ab1/Btla/Sos2/Cd3e/Tarm1/Znhit1/Clec4g/Itgam/Wnt4/Stat5a/Lrrc32/Sh3rf1/Jak3/Cd81/Arg1/Tgfbr2/Pnp/P2rx7/Cd86/Icosl/Prnp/Fyn/Il1b/Cd80/Malt1/Ccr2/Cd1d1/Slfn1/Cd209e/Tnfsf9/Cd274/Il12b/Sdc4/Scgb1a1/Il2ra/Pdcd1lg2/Aif1/Cd209a
C0_cDC2	GO:0043523	regulation of neuron apoptotic process	90	-1.71253	0.00630928	0.0261075	Cpeb4/Braf/Adora2a/Jak2/Nf1/Apoe/Birc5/Egr1/Nsmf/Nqo2/Sct/Prnp/Fyn/Hyou1/Kdr/Ngfr/Hipk2/F2r/Lrp1/Trim2/Il1b/Tnf/Gata3/Cx3cl1/Hif1a/Mt1/Nr4a3/Axl
C0_cDC2	GO:0045664	regulation of neuron differentiation	249	-1.71342	0.000654677	0.00500541	Itsn1/Klk8/Cyfip1/S100a9/Il1rap/Lrp4/Cav1/Ret/Hspa5/Dpysl2/Gata2/Ulk4/Bmp2/Braf/Scn1b/Ptpn9/Sema6d/Dbn1/Picalm/Thy1/Plxnd1/Pdlim5/Ttc3/Bmpr2/Ptprs/Nf1/Fn1/Igf1r/Zfhx3/Myo9a/Apoe/Cdc20/Arsb/Plxna4/Rbpj/Nsmf/Aspm/D16Ertd472e/Smurf1/Lpar3/Nfe2l2/Camsap2/Calr/Lif/Fyn/App/Ccdc88a/Fgfr1/Ngfr/Lrp1/Inppl1/Itm2c/Il1b/Gata3/Ehd1/Sema4c/Nrep/Plk2/Cx3cl1/Itgb1/Skil/Sema4a/Cflar/Timp2/Tubb2b/Tnfrsf12a/Rap2a/O…
C0_cDC2	GO:0050671	positive regulation of lymphocyte proliferation	66	-1.71389	0.00946942	0.0351918	Tlr4/Il5/Irs2/Stat5a/Cd74/Jak3/Cd81/Tgfbr2/Pnp/Bst1/Cd86/Icosl/Slc39a10/Il1b/Cd80/Ccr2/Cd1d1/Cd209e/Cd40/Tnfsf9/Cd274/Il12b/Il2ra/Pdcd1lg2/Cdkn1a/Aif1
C0_cDC2	GO:0031344	regulation of cell projection organization	271	-1.71581	0.000441569	0.00371022	Itsn1/Klk8/Cyfip1/S100a9/Il1rap/Lrp4/Cav1/Rab8b/Epha2/Ret/Hspa5/Dpysl2/Ulk4/Braf/Scn1b/Plekhm1/Ptpn9/Sema6d/Dbn1/Picalm/Thy1/Plxnd1/Pdlim5/Bmpr2/P2rx7/Ptprs/Nf1/Fn1/Igf1r/Myo9a/Apoe/Cdc20/Arsb/Plxna4/Icam1/Rbpj/Nsmf/Eps8/Sept9/D16Ertd472e/Smurf1/Lpar3/Nfe2l2/Prnp/Camsap2/Lif/Fyn/Ccdc88a/Prkcd/Fgfr1/Ngfr/Lrp1/Inppl1/Itm2c/Gata3/Ehd1/Tgfbr1/Sema4c/Src/Fscn1/Plk2/Cx3cl1/Itgb1/Skil/Pdpn/Sema4a/Cflar/…
C0_cDC2	GO:0007613	memory	46	-1.71927	0.0133622	0.0451983	Adrb1/Klk8/Rcan1/Idua/Itga5/Apoe/Egr1/Hrh2/App/Il1b/Comt/Plk2/Hrh1/Cyp7b1/Ccnd2/Htr7/Il1rn
C0_cDC2	GO:0014070	response to organic cyclic compound	209	-1.72518	0.00101006	0.00684624	Pkd2/Stat5a/Pde2a/Braf/Tgfbr2/Adora2a/P2ry1/Casp7/Acod1/P2rx7/Pde4b/Jak2/Ass1/Ifit3/Npc1/Rftn1/Rxra/Cd83/Pdia3/Egr1/Atp1a1/Zfp366/P2ry6/Jup/Calr/Ralb/App/Pdgfb/Asph/Hsp90b1/Il1b/Tnf/Tgfbr1/Tlr3/Src/Ctnna1/Prkca/Hrh1/Cflar/Nod2/Vdr/Rora/Fosl2/Cyp7b1/Klf9/Ramp3/Socs1/Socs2/Htr7/Il1rn/Nr4a3/Ccr5/Cdh1/Dab2
C0_cDC2	GO:0051402	neuron apoptotic process	97	-1.7262	0.00505367	0.0220807	Cpeb4/Braf/Adora2a/Casp7/Jak2/Nf1/Apoe/Birc5/Egr1/Nsmf/Nqo2/Sct/Prnp/Fyn/App/Hyou1/Kdr/Ngfr/Hipk2/F2r/Lrp1/Trim2/Il1b/Tnf/Gata3/Cx3cl1/Hif1a/Mt1/Nr4a3/Axl
C0_cDC2	GO:0045088	regulation of innate immune response	137	-1.72649	0.00249831	0.0135405	Cd74/Arg1/Pvr/Acod1/Ptprs/Nectin2/Irgm2/Rftn1/Apoe/Slamf8/Cd86/Plscr1/Ifi204/Tnfaip3/B430306N03Rik/Tnf/Ifi211/Tlr3/Zbp1/Irgm1/Nod2/Rsad2/Treml2/Cd226/Il12b/Serpinb9/Klrb1b/Cd14/Socs1/Ifi205/Ccr1/Tnip3/Gbp5/Mmp12
C0_cDC2	GO:0010594	regulation of endothelial cell migration	59	-1.72933	0.00952892	0.0353291	Epha2/Gata2/Stat5a/Plcg1/Bmpr2/Nf1/Apoe/Pik3r2/Nfe2l2/Jup/Calr/Pdgfb/Fgfr1/Kdr/Gata3/Ets1/Adora2b/Plk2/Prkca/Hif1a/Sema4a/Cd40/Spred1
C0_cDC2	GO:0042129	regulation of T cell proliferation	83	-1.73018	0.00585989	0.0247192	Stat5a/Lrrc32/Sh3rf1/Jak3/Cd81/Arg1/Tgfbr2/Pnp/Cd86/Icosl/Prnp/Il1b/Cd80/Ccr2/Cd1d1/Slfn1/Cd209e/Tnfsf9/Cd274/Il12b/Sdc4/Scgb1a1/Il2ra/Pdcd1lg2/Aif1/Cd209a
C0_cDC2	GO:0021537	telencephalon development	64	-1.7316	0.00839989	0.032281	Inhba/Pfdn1/Htt/Zswim6/Atf5/Kdm6b/Ulk4/Bmp2/Csf1r/Ptprs/Nf1/Plxna4/Aspm/Sct/Fgfr1/Chd7/Ski/Zbtb18/Bhlhe22/Hif1a/Nrp2/Syne2/Afdn/Nr4a3
C0_cDC2	GO:0050731	positive regulation of peptidyl-tyrosine phosphorylation	69	-1.73437	0.00757078	0.0299041	Acvr1/Iqgap1/Cd3e/Cass4/Adra2a/Tlr4/Lrp4/Il5/Csf1r/Cd74/Cd81/Jak2/Itga5/Nedd9/Icam1/Prnp/Cav2/Lif/Fyn/Pdgfb/Kitl/Tnf/Cd80/Hbegf/Src/Itgb1/Ctnnd1/Cd40/Nod2/Il12b/Fcgr1/Ptger4
C0_cDC2	GO:1901652	response to peptide	141	-1.73489	0.00202056	0.0114539	Cyfip1/Tlr4/Ptpn2/Cav1/Rab8b/Uso1/Irs2/Stat5a/Braf/Gatm/Cad/Jak2/Igf1r/Soga1/Nucb2/Egr1/Pik3r2/Icam1/Sesn2/Prnp/Cav2/Tnfaip3/Fyn/App/Prkcd/Ngfr/Casp4/Lrp1/Serpina3g/Inppl1/Serpina3f/Il1b/Src/Prkca/Nod2/Ramp3/Socs1/Socs3/Socs2/Nr4a3/Egr2/Fcgr2b/Cish
C0_cDC2	GO:0043085	positive regulation of catalytic activity	410	-1.73517	3.74076e-05	0.000543678	Dynll2/Adra2a/Tnks/Psap/Vav3/Rasgrp1/Tnfrsf11a/Ccl9/Map4k5/Tank/Clu/Tbc1d9/Camkk1/Tbc1d13/Adrb1/Usp50/Tlr4/S100a9/Cav1/Wnt4/Epha2/Ret/Ccl12/Mdfic/Gch1/Pih1d1/Bmp2/Ppp2r3c/Csf1r/Pkd2/Maged1/Cycs/Cd74/Cd81/Tgfbr2/Picalm/Thy1/P2rx7/Jak2/S1pr1/Irgm2/Nf1/Nedd9/Map3k14/Myo9a/Apoe/Cdc20/Egr1/Icam1/Ms4a2/Plek/Snx18/Gnaq/Ddx3x/Dock7/Tbc1d9b/Plscr1/Slc39a10/Lpar3/Chchd10/Prnp/Orai1/Ralb/Cav2/Gadd45g/Fyn/Pd…
C0_cDC2	GO:0071363	cellular response to growth factor stimulus	186	-1.73524	0.00109371	0.00719011	Zfp703/Cyfip1/Cav1/Wnt4/Hspa5/Hhex/Bmp2/Ptpn12/Lrrc32/Dbn1/Plcg1/Tgfbr2/Bmpr2/Pde8a/Il17f/Igf1r/Ltbp3/Egr1/Rbpj/Col4a2/Smurf1/Cav2/Fyn/Pdgfb/Itgb5/Fgfr1/Kdr/Ngfr/Hipk2/Eng/Flt1/Hfe/Ski/Gata3/Ehd1/Tgfbr1/Src/Nrep/Sulf2/Calca/Egr3/Skil/Hif1a/Htra3/Cflar/Chst11/Furin/Nrp2/Runx1/Ccl2/Myof/Cd63/Got1/Pmepa1/Flrt3/Dab2
C0_cDC2	GO:0032412	regulation of ion transmembrane transporter activity	78	-1.73585	0.00649789	0.0267062	S100a1/Dlg1/Hk1/Mmp9/1810037I17Rik/Neto2/Htt/Adrb1/Cav1/Fxyd2/Ank2/Pkd2/Scn1b/Plcg1/Gpr35/Ctss/Pde4b/Rangrf/Rem1/P2ry6/Chchd10/Prnp/Wnk1/Cacnb2/Alox5/Asph/Ptafr/Atp1b1/Kcne3/Cox17/Prkca/Cacnb3/Ccl2/Stk39/Dapk1
C0_cDC2	GO:0018108	peptidyl-tyrosine phosphorylation	126	-1.73632	0.00263415	0.0140356	Tlr4/Ptpn2/Lrp4/Cav1/Il5/Csf1r/Stat5a/Cd74/Jak3/Cd81/Thy1/Jak2/Itga5/Nedd9/Igf1r/Bst1/Icam1/Prnp/Cav2/Lif/Fyn/App/Pdgfb/Prkcd/Fgfr1/Kdr/Flt1/Kitl/Tnf/Cd80/Itk/Hbegf/Src/Prkca/Itgb1/Ctnnd1/Cd40/Nod2/Aplp2/Il12b/Socs1/Socs3/Fcgr1/Ptger4
C0_cDC2	GO:0043535	regulation of blood vessel endothelial cell migration	41	-1.73934	0.0135741	0.0457072	Epha2/Gata2/Stat5a/Plcg1/Nf1/Apoe/Pik3r2/Nfe2l2/Jup/Pdgfb/Fgfr1/Kdr/Ets1/Plk2/Prkca/Hif1a/Cd40/Spred1
C0_cDC2	GO:0120036	plasma membrane bounded cell projection organization	482	-1.73961	1.85856e-05	0.000372134	Klk8/Cyfip1/S100a9/Il1rap/Lrp4/Cav1/Epha2/Ret/Hspa5/Ablim3/Dpysl2/Ulk4/Spef2/Spire1/Hdgfl3/Csf1r/Pkd2/Cep89/Braf/Scn1b/Plekhm1/Vasp/Ophn1/Ptpn9/B4galt5/Stxbp5/Sema6d/Dbn1/Adora2a/Picalm/Thy1/Plxnd1/Pdlim5/Bmpr2/P2rx7/Ptprs/Jak2/Nectin2/S1pr1/Enah/Nf1/Fn1/Igf1r/Myo9a/Plppr4/Apoe/Cdc20/Arsb/Plxna4/Icam1/Rbpj/Plek/Nsmf/Palld/Eps8/Pip5k1c/Sept9/D16Ertd472e/Dock7/Ttc39c/Smurf1/Lpar3/Fgd1/Nfe2l2/Gas7/P…
C0_cDC2	GO:0051249	regulation of lymphocyte activation	207	-1.74044	0.000914112	0.00638426	Irs2/Stat5a/Braf/Lrrc32/Sh3rf1/Zbtb16/Clptm1/Cd74/Jak3/Cd81/Arg1/Tgfbr2/Adora2a/Thy1/Nfkbiz/Pnp/Bst1/Il4ra/Cd83/Slamf8/Cd86/Icosl/Slc39a10/Atp11c/Prnp/Tnfaip3/Nfkbid/Ctla2a/Hfe/Il1b/Cd80/Malt1/Ccr2/Gata3/Il1rl2/Cd1d1/Egr3/Slfn1/Cd209e/Mmp14/Cd40/Nod2/Tnfsf9/Runx1/Cd274/Il12b/Ccl2/Sdc4/Scgb1a1/Il2ra/Pdcd1lg2/Il7r/Socs1/Cdkn1a/Aif1/Axl/Fcgr2b/Cd209a
C0_cDC2	GO:0120035	regulation of plasma membrane bounded cell projection organization	267	-1.7414	0.000326854	0.00294687	Itsn1/Klk8/Cyfip1/S100a9/Il1rap/Lrp4/Cav1/Epha2/Ret/Hspa5/Dpysl2/Ulk4/Braf/Scn1b/Plekhm1/Ptpn9/Sema6d/Dbn1/Picalm/Thy1/Plxnd1/Pdlim5/Bmpr2/P2rx7/Ptprs/Nf1/Fn1/Igf1r/Myo9a/Apoe/Cdc20/Arsb/Plxna4/Icam1/Rbpj/Nsmf/Eps8/Sept9/D16Ertd472e/Smurf1/Lpar3/Nfe2l2/Prnp/Camsap2/Lif/Fyn/Ccdc88a/Prkcd/Fgfr1/Ngfr/Lrp1/Inppl1/Itm2c/Gata3/Ehd1/Tgfbr1/Sema4c/Src/Fscn1/Plk2/Cx3cl1/Itgb1/Skil/Pdpn/Sema4a/Cflar/Tubb2b…
C0_cDC2	GO:0050777	negative regulation of immune response	73	-1.74166	0.00685269	0.0278421	Jak3/Arg1/Acod1/Il4ra/Slamf8/Tnfaip3/Hfe/Tnf/Ccr2/Cd84/Nod2/Il12b/Serpinb9/Klrb1b/Il2ra/Il7r/Ccr1/Il1rl1/Fcgr2b/Mmp12
C0_cDC2	GO:0014902	myotube differentiation	44	-1.74204	0.0117559	0.0413713	Nln/Cd81/Capn2/Il4ra/Hacd1/Cav2/Ptgfrn/Ski/Ehd1/Cflar/Mmp14/Myof/Cxcl10/Cxcl9
C0_cDC2	GO:0023057	negative regulation of signaling	481	-1.74242	3.71879e-05	0.000543678	Rcan1/Tlr4/Ptpn2/Prdm15/Rab11fip5/Lrp4/Cav1/Wnt4/Phlpp1/Epha2/Hspa5/Adgrg3/Gata2/Hhex/Pih1d1/Bmp2/Grk5/Ybx3/Pkd2/Pde2a/Braf/Hipk3/Sh3rf1/Sac3d1/Celf4/Hic1/Tmem88/Bcl2a1c/Cd74/Deptor/Gpr35/Arg1/Bcl2a1b/Thy1/Slc35f6/Vhl/Acod1/P2rx7/Ctnnbip1/Inpp5e/Ptprs/Pde4b/Nf1/Igf1r/Nucb2/Ptgir/Apoe/Egr1/Pik3r2/Icam1/Plek/Sesn2/Zfp366/Ddx3x/Smurf1/Litaf/Nfe2l2/Lfng/Prnp/Calr/Cav2/Tnfaip3/Prr5l/Lif/Nfkbid/Fyn/Hyo…
C0_cDC2	GO:0051051	negative regulation of transport	205	-1.74246	0.000798738	0.0057308	Mctp1/Cyfip1/Entpd1/Rab11fip5/Cav1/Ubr5/Ffar4/Tlr2/Mdfic/Srgn/Pkd2/Irs2/Braf/Lrrc32/Idua/Cd74/Gpr35/Picalm/P2ry1/Slc35f6/Nf1/Fn1/Nucb2/Apoe/Icam1/Bag3/Gnaq/Anxa4/Rem1/Sct/Hrh2/Tnfaip3/Lif/Apod/Wnk1/Ier3/F2r/Siglece/Il1b/Tnf/Ccr2/Kcne3/Pacsin2/Comt/Cx3cl1/Prkca/Cacnb3/Cd84/Pea15a/Rsad2/Cttnbp2nl/Gbp4/Tnfrsf9/Htr7/Cd200r1/Stk39/Il1rn/Ptger4/Fabp5/Fcgr2b
C0_cDC2	GO:0022898	regulation of transmembrane transporter activity	80	-1.7445	0.00552948	0.0236065	S100a1/Dlg1/Hk1/Mmp9/1810037I17Rik/Actb/Neto2/Htt/Adrb1/Cav1/Fxyd2/Ank2/Pkd2/Scn1b/Plcg1/Gpr35/Ctss/Pde4b/Rangrf/Rem1/P2ry6/Chchd10/Prnp/Wnk1/Cacnb2/Alox5/Asph/Ptafr/Atp1b1/Kcne3/Cox17/Prkca/Cacnb3/Ccl2/Stk39/Dapk1
C0_cDC2	GO:0050870	positive regulation of T cell activation	100	-1.74474	0.00428465	0.01969	Stat5a/Zbtb16/Cd74/Jak3/Cd81/Tgfbr2/Thy1/Nfkbiz/Pnp/Il4ra/Cd83/Cd86/Icosl/Nfkbid/Il1b/Cd80/Malt1/Ccr2/Gata3/Il1rl2/Cd1d1/Egr3/Cd209e/Tnfsf9/Runx1/Cd274/Il12b/Ccl2/Il2ra/Pdcd1lg2/Il7r/Socs1/Aif1
C0_cDC2	GO:0010648	negative regulation of cell communication	480	-1.74567	3.72148e-05	0.000543678	Rcan1/Tlr4/Ptpn2/Prdm15/Rab11fip5/Lrp4/Cav1/Wnt4/Phlpp1/Epha2/Hspa5/Adgrg3/Gata2/Hhex/Pih1d1/Bmp2/Grk5/Ybx3/Pkd2/Pde2a/Braf/Hipk3/Sh3rf1/Sac3d1/Celf4/Hic1/Tmem88/Bcl2a1c/Cd74/Deptor/Gpr35/Arg1/Bcl2a1b/Thy1/Slc35f6/Vhl/Acod1/P2rx7/Ctnnbip1/Inpp5e/Ptprs/Pde4b/Nf1/Igf1r/Nucb2/Ptgir/Apoe/Egr1/Pik3r2/Icam1/Plek/Sesn2/Zfp366/Ddx3x/Smurf1/Litaf/Nfe2l2/Lfng/Prnp/Calr/Cav2/Tnfaip3/Prr5l/Lif/Nfkbid/Fyn/Hyo…
C0_cDC2	GO:0071417	cellular response to organonitrogen compound	172	-1.74593	0.00138973	0.0087192	Cyfip1/Tlr4/Ptpn2/Cav1/Rab8b/Uso1/Tlr2/Pkd2/Cpeb4/Irs2/Stat5a/Pde2a/P2ry1/Casp7/Pde4b/Jak2/Capn2/Igf1r/Soga1/Nucb2/Egr1/Pik3r2/Icam1/Sesn2/Nsmf/P2ry6/Jup/Prnp/Mapk13/Cav2/Fyn/App/Prkcd/Ngfr/Casp4/Lrp1/Inppl1/Hsp90b1/Il1b/Tnf/Src/Ctnna1/Prkca/Hrh1/Nod2/Socs1/Socs3/Socs2/Nr4a3/Cdh1/Fcgr2b/Cish
C0_cDC2	GO:0032880	regulation of protein localization	396	-1.74633	1.87213e-05	0.000372134	Usp50/Tlr4/Rab11fip5/Il1rap/Lrp4/Epha2/Il5/Cltc/Ubr5/Ffar4/Tlr2/Mdfic/Srgn/Csf1r/Irs2/Exoc4/Lrrc32/Maged1/Ptpn9/Idua/Dbn1/Cd81/Adora2a/Picalm/Vhl/P2rx7/Inpp5e/Jak2/Il17f/Nf1/Fn1/Rangrf/Il4ra/Apoe/Birc5/Pik3r2/Sesn2/Bag3/Epb41/Anxa4/Jup/Prnp/Ralb/Cav2/Tnfaip3/Prr5l/Lif/Fyn/Oxct1/Apod/Ccdc88a/Prkcd/Xpo1/Ngfr/Casp4/F2r/Asph/Lrp1/Edem1/Hfe/Il1b/Tnf/Gata3/Tmbim1/Src/Cx3cl1/Itgb1/Cacnb3/Arid5a/Stx3/Hif…
C0_cDC2	GO:0070588	calcium ion transmembrane transport	85	-1.74854	0.00476413	0.0211801	Ank2/Pkd2/Plcg1/Gpr35/Thy1/P2rx7/Pde4b/Ms4a2/Rem1/P2ry6/Prnp/Orai1/Fyn/Cacnb2/F2r/Asph/Chd7/Atp1b1/Kcne3/Mcub/Clec4b1/Cx3cl1/Cacnb3/Ramp3/Ccr5/Cxcl10
C0_cDC2	GO:0043524	negative regulation of neuron apoptotic process	59	-1.74917	0.00835327	0.0321454	Itsn1/Ccl12/Cpeb4/Braf/Adora2a/Jak2/Apoe/Birc5/Sct/Fyn/Hyou1/Kdr/Ngfr/Hipk2/F2r/Lrp1/Cx3cl1/Hif1a/Mt1/Nr4a3/Axl
C0_cDC2	GO:0001503	ossification	125	-1.74924	0.00243328	0.013264	Zmpste24/Cebpd/Lrp4/Wnt4/Epha2/Srgn/Bmp2/Mgp/Zbtb16/Ext2/Bmpr2/P2rx7/Ctnnbip1/S1pr1/Nf1/Sbno2/Ltbp3/Rbpj/Rflnb/Smurf1/Fndc3b/Pdlim7/Ifi204/Fgfr1/Bmp2k/Isg15/Inppl1/Tnf/Dhrs3/Csf1/Ski/Calca/Hif1a/Mmp14/Clec5a/Rsad2/Ccr1/Mtss1/Ptger4/Egr2/Sh3pxd2b
C0_cDC2	GO:0043542	endothelial cell migration	76	-1.74941	0.00583478	0.0246589	Epha2/Gata2/Stat5a/Plcg1/Vhl/Plxnd1/Bmpr2/Nf1/Apoe/Pik3r2/Nfe2l2/Jup/Calr/Pdgfb/Fgfr1/Kdr/Gata3/Ets1/Tgfbr1/Adora2b/Plk2/Prkca/Itgb1/Egr3/Hif1a/Sema4a/Cd40/Spred1
C0_cDC2	GO:0043123	positive regulation of I-kappaB kinase/NF-kappaB signaling	43	-1.75075	0.0116549	0.0411178	Fyn/Il1b/Tnf/Tlr3/Cx3cl1/Tmem106a/Nod2/Il1rn/Clec4n/Il1a
C0_cDC2	GO:0070302	regulation of stress-activated protein kinase signaling cascade	92	-1.7509	0.0042153	0.0194342	Rasgrp1/Tnfrsf11a/Zmpste24/Tlr4/Phlpp1/Mdfic/Ulk4/Bmp2/Mid1/Hipk3/Sh3rf1/Igf1r/Gadd45g/App/Rell1/Hipk2/Il1b/Tnf/Sema4c/Tlr3/Lmnb1/Nod2/Gadd45b/Rap2a/Il1rn/Trf/Il1a/Fcgr2b/Dab2
C0_cDC2	GO:0070848	response to growth factor	190	-1.75457	0.000919423	0.00638426	Zfp703/Cyfip1/Cav1/Wnt4/Epha2/Hspa5/Hhex/Bmp2/Ptpn12/Lrrc32/Dbn1/Plcg1/Tgfbr2/Bmpr2/Pde8a/Il17f/Igf1r/Ltbp3/Zfhx3/Egr1/Rbpj/Col4a2/Smurf1/Cav2/Fyn/Pdgfb/Itgb5/Fgfr1/Kdr/Ngfr/Hipk2/Eng/Flt1/Hfe/Ski/Gata3/Ehd1/Tgfbr1/Src/Nrep/Sulf2/Calca/Egr3/Skil/Hif1a/Htra3/Cflar/Chst11/Furin/Nrp2/Runx1/Ccl2/Myof/Cd63/Got1/Pmepa1/Flrt3/Dab2
C0_cDC2	GO:0008217	regulation of blood pressure	44	-1.75481	0.0110459	0.0394596	Adrb1/Gch1/Kcnk6/Bmpr2/Nampt/Erap1/Atp1a1/Pdgfb/Wnk1/Ece1/Ier3/F2r/Eng/Ptafr/Calca/C3ar1/Nav2/F11r/Stk39
C0_cDC2	GO:0034332	adherens junction organization	45	-1.7553	0.0112104	0.0399682	Zfp703/Rab8b/Wnt4/Peak1/Thy1/Apod/Kdr/Lrp1/Src/Mmp14/Actn1/Sdc4/Afdn/Mtss1/Cdh1
C0_cDC2	GO:0045639	positive regulation of myeloid cell differentiation	53	-1.7553	0.00909543	0.0344873	Il5/Gata2/Csf1r/Stat5a/Cd74/Ctnnbip1/Lif/Isg15/Kitl/Tnf/Csf1/Ets1/Scin/Prkca/Hif1a/Runx1/Il12b/Dcstamp/Trib1/Ccr1
C0_cDC2	GO:0051607	defense response to virus	94	-1.75585	0.00399012	0.018559	Ifit3/Map3k14/Cd86/Plscr1/Ifit1/Itgax/Oasl2/Ifit2/Isg15/Il1b/Tlr3/Zbp1/Gbp2b/Cd40/Rsad2/Il12b/Il2ra/Gbp4/Mmp12/Cxcl10/Cxcl9
C0_cDC2	GO:0050670	regulation of lymphocyte proliferation	110	-1.75698	0.00290938	0.0151482	H2-Ab1/Btla/Sos2/Cd3e/Tarm1/Znhit1/Vav3/Clec4g/Tlr4/Il5/Irs2/Stat5a/Lrrc32/Sh3rf1/Cd74/Jak3/Cd81/Arg1/Tgfbr2/Pnp/Bst1/Cd86/Icosl/Slc39a10/Prnp/Il1b/Cd80/Ccr2/Cd1d1/Slfn1/Cd209e/Cd40/Tnfsf9/Cd274/Il12b/Sdc4/Scgb1a1/Il2ra/Pdcd1lg2/Cdkn1a/Aif1/Fcgr2b/Cd209a
C0_cDC2	GO:1905954	positive regulation of lipid localization	33	-1.75779	0.0150726	0.049487	P2rx7/Nucb2/Apoe/Hilpda/Prkcd/Lrp1/Il1b/Ehd1/Runx1/Il1a/Dab2
C0_cDC2	GO:2000514	regulation of CD4-positive, alpha-beta T cell activation	35	-1.7599	0.0135848	0.0457072	Sh3rf1/Jak3/Cd81/Tgfbr2/Nfkbiz/Il4ra/Cd83/Nfkbid/Malt1/Ccr2/Gata3/Runx1/Cd274/Socs1
C0_cDC2	GO:0060322	head development	203	-1.76255	0.000661427	0.00502106	Sptbn2/Cd3e/Pfas/Inhba/Rac3/Pomk/Pfdn1/Htt/Nnat/Mafb/Zswim6/Sept4/Atf5/Kdm6b/Wnt4/Hspa5/Dpysl2/Gata2/Ulk4/Spef2/Hhex/Bmp2/Csf1r/Irs2/Braf/Ophn1/Sema6d/Tgfbr2/Ptprs/S1pr1/Nf1/Igf1r/Zfhx3/Slc4a7/Arsb/Plxna4/Rbpj/Aspm/Gnaq/D16Ertd472e/Dock7/Sct/Fyn/App/Kif1a/Fgfr1/Asph/Chd7/Ski/Zbtb18/Sema4c/Src/Bhlhe22/Csrnp1/Itgb1/Hif1a/Mmp14/Aplp2/Nrp2/Syne2/Rora/Wls/Afdn/Aldh1a2/Nr4a3/Flrt3/Axl/Egr2/Fcgr2b
C0_cDC2	GO:0060562	epithelial tube morphogenesis	112	-1.76302	0.0029017	0.0151482	Mthfd1/Kdm5b/Wnt4/Epha2/Ret/Hhex/Bmp2/Pkd2/Mgp/Maged1/Vasp/Tgfbr2/Plxnd1/Ctnnbip1/Enah/Rbpj/Luzp1/Itgax/Kdr/Eng/Flt1/Tnf/Csf1/Ski/Gata3/Sema4c/Src/Hif1a/Mmp14/Vdr/Clic4/Spint1/Sdc4/Aldh1a2/Mtss1/Cxcl10
C0_cDC2	GO:0098542	defense response to other organism	180	-1.76309	0.000880557	0.00620542	P2rx7/Irgm2/Ifit3/Map3k14/Il4ra/Slamf8/Cd86/Rbpj/Plscr1/Ifit1/Itgax/Oasl2/Prkcd/Ifit2/Isg15/Il1b/Tnf/Cxcl1/Tlr3/Zbp1/Gbp3/Gbp2b/Cd40/Nod2/Rsad2/Il12b/Serpinb9/Il2ra/Gbp4/Batf2/Gbp7/Fcgr1/Iigp1/Clec4n/Gbp2/Mmp12/Cd209d/Cxcl10/Cxcl9
C0_cDC2	GO:0010769	regulation of cell morphogenesis involved in differentiation	109	-1.76354	0.00294545	0.0152647	Cyfip1/Lrp4/Ret/Dpysl2/Braf/Sema6d/Dbn1/Picalm/Thy1/Plxnd1/Pdlim5/Ttc3/Bmpr2/Ptprs/Fn1/Nedd9/Apoe/Plxna4/Nsmf/Lpar3/Calr/Dock1/Lrp1/Sema4c/Skil/Pdpn/Sema4a/Tubb2b/Tnfrsf12a/Rap2a/Olfm1/Afdn/Plxna1/Ccr5/Dab2
C0_cDC2	GO:0051093	negative regulation of developmental process	362	-1.7645	5.66743e-05	0.000731614	Klk8/Ptpn2/Lrp4/Cav1/Tspo/Wnt4/Epha2/Stab1/Tlr2/Gata2/Srgn/Hhex/Bmp2/Ybx3/Stat5a/Ctsc/Ptpn9/Zbtb16/Idua/Cd74/Sema6d/Jak3/Tgfbr2/Thy1/Vhl/Ttc3/Bmpr2/Sav1/Ptprs/Il17f/Nf1/Timp1/Il4ra/Ltbp3/Zfhx3/Nucb2/Vat1/Apoe/Cd86/Pik3r2/Nampt/Rbpj/Rflnb/Hopx/Aspm/Col4a2/Nfe2l2/Lfng/Fndc3b/Tmem176b/Calr/Lif/Nfkbid/App/Pdgfb/Fgfr1/Ngfr/Lrp1/Inppl1/Pilrb1/Itm2c/Il1b/Tnf/Ski/Ccr2/Gata3/Tgfbr1/Sema4c/Iqcb1/Ctnna1/Plk…
C0_cDC2	GO:0060627	regulation of vesicle-mediated transport	200	-1.76818	0.000604253	0.00474269	Sept4/Clu/Mctp1/Itsn1/Itgam/Cav1/Rab8b/Snap23/Tlr2/Gata2/Braf/Ophn1/Stxbp5/Adora2a/Picalm/P2ry1/Il4ra/Pla2g4a/Apoe/Ms4a2/Cyth1/Pip5k1c/Calr/Ralb/Siglece/Rab20/Lrp1/Hfe/Il1b/Tnf/Ptafr/Ccr2/Ehd1/Src/Adora2b/Pacsin2/Stxbp6/Prkca/Adora3/Itgb1/Hip1/Cd84/Cd209b/Nod2/Ccl2/Sdc4/Pros1/Fcgr3/Cd14/Cd63/Mfge8/Htr7/Fcgr1/Trf/Axl/Fcgr2b/Dab2
C0_cDC2	GO:0001938	positive regulation of endothelial cell proliferation	40	-1.76834	0.011534	0.0407928	Cav1/Gata2/Bmp2/Stat5a/Plcg1/Arg1/Bmpr2/Nf1/Cav2/Pdgfb/Fgfr1/Kdr/Adora2b/Prkca/Egr3/Ccl2/Ccl24
C0_cDC2	GO:1904377	positive regulation of protein localization to cell periphery	26	-1.76841	0.015263	0.0499387	Sptbn1/Dlg1/Ppp1r9b/Pgrmc1/Epha2/Ptpn9/Rangrf/Epb41/Prnp/Lrp1/Tnf/Itgb1/Stx3/Ramp3
C0_cDC2	GO:0070201	regulation of establishment of protein localization	291	-1.76884	0.000191303	0.0019667	Adrb1/Usp50/Tlr4/Rab11fip5/Il1rap/Il5/Ubr5/Ffar4/Tlr2/Mdfic/Srgn/Csf1r/Irs2/Exoc4/Lrrc32/Idua/Cd81/Adora2a/Picalm/P2rx7/Jak2/Il17f/Nf1/Fn1/Il4ra/Apoe/Birc5/Pik3r2/Bag3/Anxa4/Jup/Prnp/Tnfaip3/Prr5l/Fyn/Oxct1/Apod/Prkcd/Xpo1/Casp4/F2r/Asph/Lrp1/Edem1/Il1b/Tnf/Gata3/Src/Cx3cl1/Cacnb3/Arid5a/Hif1a/Cd84/Clec5a/Cd40/Nod2/Rsad2/Cd274/Wls/Ccl2/Cd14/Socs1/Gbp4/Tnfrsf9/Cd200r1/Aif1/Ccr5/Ptger4/Cdh1/Il1rl1/…
C0_cDC2	GO:0032946	positive regulation of mononuclear cell proliferation	67	-1.77128	0.00602088	0.0251831	Tlr4/Il5/Irs2/Stat5a/Cd74/Jak3/Cd81/Tgfbr2/Pnp/Bst1/Cd86/Icosl/Slc39a10/Il1b/Csf1/Cd80/Ccr2/Cd1d1/Cd209e/Cd40/Tnfsf9/Cd274/Il12b/Il2ra/Pdcd1lg2/Cdkn1a/Aif1
C0_cDC2	GO:0031098	stress-activated protein kinase signaling cascade	122	-1.77131	0.00223749	0.0124549	Mapk13/Gadd45g/App/Rell1/Hipk2/Il1b/Tnf/Sema4c/Tlr3/Lmnb1/Nod2/Gadd45b/Rap2a/Stk39/Il1rn/Trib1/Ptger4/Trf/Il1a/Fcgr2b/Dab2
C0_cDC2	GO:0032368	regulation of lipid transport	35	-1.77139	0.0124668	0.0434959	Apoc2/Tnfrsf11a/Kdm5b/Irs2/Dgat1/P2rx7/Nucb2/Apoe/Hrh2/Prkcd/Lrp1/Il1b/Ttc39b/Runx1/Il1a/Dab2
C0_cDC2	GO:0071900	regulation of protein serine/threonine kinase activity	173	-1.77154	0.000957592	0.00653741	Shc1/Map3k20/Actb/Fbxo7/Iqgap1/Pik3cg/Map2k3/Map4k1/Paqr3/Adra2a/Rasgrp1/Tnfrsf11a/Htt/Tlr4/Cav1/Ret/Mdfic/Hhex/Pih1d1/Bmp2/Csf1r/Pkd2/Maged1/Hipk3/Cd74/Cd81/Thy1/Ccnl1/P2rx7/Jak2/Irgm2/Nf1/Igf1r/Apoe/Sesn2/Ddx3x/Lpar3/Ralb/Tnfaip3/Gadd45g/Pdgfb/Prkcd/Fgfr1/F2r/Flt1/Kitl/Inppl1/Il1b/Tnf/Tgfbr1/Ccng1/Src/Prkca/Cd40/Nod2/Gadd45b/Ccnd2/Spred1/Cdkn1a/Stk39/Il1rn/Trib1/Trf/Dab2
C0_cDC2	GO:0051962	positive regulation of nervous system development	198	-1.77233	0.000643225	0.00493718	Itsn1/Cyfip1/S100a9/Il1rap/Tspo/Ret/Hspa5/Tlr2/Gata2/Bmp2/Braf/Scn1b/Dbn1/Picalm/Plxnd1/Bmpr2/Nf1/Fn1/Igf1r/Apoe/Cdc20/Arsb/Plxna4/Nsmf/Aspm/D16Ertd472e/Smurf1/Lpar3/Nfe2l2/Itgax/Lif/Fyn/Fgfr1/Kdr/Ngfr/Lrp1/Il1b/Tnf/Csf1/Ccr2/Ehd1/Cx3cl1/Prkca/Itgb1/Skil/Hif1a/Sema4a/Cflar/Timp2/Tubb2b/Spint1/Tnfrsf12a/Afdn/Plxna1/Socs2/Htr7/Flrt3/Ccr5/Trf
C0_cDC2	GO:0030001	metal ion transport	224	-1.77253	0.000426175	0.00360219	Cnnm4/Tcn2/Adrb1/Zmpste24/Cav1/Tspo/Cltc/Ccl12/Fxyd2/Ank2/Pkd2/Slc12a7/Scn1b/Kcnk6/Slc5a3/Jak3/Plcg1/Gpr35/Adora2a/Thy1/Slc39a11/P2rx7/Atox1/Pde4b/Nipal1/Rangrf/Sco2/Slc4a7/Icam1/Ms4a2/Gnaq/Epb41/Atp1a1/Rem1/Slc31a2/P2ry6/Slc39a10/Lpar3/Slc20a1/Prnp/Orai1/Fyn/Pdgfb/Wnk1/Cacnb2/F2r/Asph/Nectin1/Hfe/Chd7/Atp1b1/Cxcl1/Kcne3/Slc41a1/Mcub/Clec4b1/Cx3cl1/Hrh1/Cacnb3/Cysltr1/Mllt6/Cd84/Vdr/Ramp3/Cd63/St…
C0_cDC2	GO:0010951	negative regulation of endopeptidase activity	50	-1.77391	0.00810053	0.0314283	Pih1d1/Sh3rf1/Anxa8/Adora2a/Picalm/Timp1/Birc5/Dhcr24/Ddx3x/Birc3/Serpina3g/Bcl2a1d/Serpina3f/Src/Fcmr/Cflar/Timp2/Serpinb9/Serpinb6b
C0_cDC2	GO:0055085	transmembrane transport	338	-1.77414	7.57518e-05	0.000892677	Aqp3/Ank2/Slc37a2/Pkd2/Slc12a7/Irs2/Braf/Scn1b/Kcnk6/Slc5a3/Plcg1/Gpr35/Slc7a1/Thy1/Slc39a11/Slc35f6/P2rx7/Ctss/Atox1/Pde4b/Slc35a4/Rangrf/Slco3a1/Slc16a6/Ms4a2/Sesn2/Slc35b2/Slc36a1/Atp1a1/Rem1/Slc31a2/P2ry6/Slc7a6/Slc39a10/Nfe2l2/Chchd10/Slc20a1/Clcn5/Prnp/Slc25a24/Orai1/Slc2a1/Slc15a3/Fyn/Wnk1/Prkcd/P2rx5/Cacnb2/Alox5/F2r/Asph/Hfe/Il1b/Chd7/Tnf/Ptafr/Atp1b1/Kcne3/Slc41a1/Sec61a1/Mcub/Clec4b1/S…
C0_cDC2	GO:0002708	positive regulation of lymphocyte mediated immunity	55	-1.77474	0.00747489	0.0296615	Stat5a/Cd81/Pvr/Pnp/P2rx7/Nectin2/Il1b/Tnf/Malt1/Gata3/Cd1d1/Arid5a/Cd40/Nod2/Rsad2/Cd226/Il12b/Fcgr3/Fcgr1
C0_cDC2	GO:0032147	activation of protein kinase activity	95	-1.77507	0.0032605	0.0163601	Dlg1/Map2k5/Shc1/Map3k20/Stk3/Map2k3/Map4k1/Adra2a/Map4k5/Camkk1/Tlr4/Ret/Mdfic/Bmp2/Ppp2r3c/Cd74/Cd81/Tgfbr2/P2rx7/Jak2/Map3k14/Lpar3/Prnp/Gadd45g/Pdgfb/Ccdc88a/Prkcd/F2r/Il1b/Tnf/Malt1/Tgfbr1/Src/Gadd45b/Il12b/Socs1/Stk39/Trf/Dab2
C0_cDC2	GO:1901699	cellular response to nitrogen compound	190	-1.7768	0.00062599	0.00485741	Cyfip1/Tlr4/Ptpn2/Cav1/Rab8b/Uso1/Tlr2/Pkd2/Cpeb4/Irs2/Stat5a/Pde2a/P2ry1/Casp7/P2rx7/Pde4b/Jak2/Capn2/Igf1r/Soga1/Ddi2/Nucb2/Egr1/Pik3r2/Icam1/Sesn2/Nsmf/P2ry6/Jup/Prnp/Mapk13/Ralb/Cav2/Fyn/App/Prkcd/Ngfr/Casp4/Lrp1/Inppl1/Hsp90b1/Il1b/Tnf/Tlr3/Src/Ctnna1/Prkca/Hrh1/Cflar/Nod2/Socs1/Socs3/Socs2/Nr4a3/Cdh1/Fcgr2b/Cish
C0_cDC2	GO:0090066	regulation of anatomical structure size	191	-1.77722	0.000607069	0.00474269	Adrb1/Cyfip1/Cav1/Ret/Tlr2/Dpysl2/Gch1/Spire1/Slc12a7/Vasp/Sema6d/Dbn1/Deptor/Adora2a/Picalm/P2ry1/Bmpr2/P2rx7/Ptprs/Npr1/Fn1/Apoe/Capg/Plxna4/Pik3r2/Icam1/Plek/Eps8/Sct/Lpar3/Hrh2/Dock4/Pdgfb/Prkcd/Ece1/Kdr/Alox5/F2r/Lrp1/Tnf/Ptafr/Tmem123/Sema4c/Scin/Adora2b/Lima1/Cx3cl1/Calca/Hrh1/Cysltr1/Hif1a/Sema4a/Arhgap18/Tnfrsf12a/Tbxas1/Olfm1/Il7r/Htr7/Ccl24/Ccr5
C0_cDC2	GO:0007189	adenylate cyclase-activating G protein-coupled receptor signaling pathway	35	-1.77732	0.0119183	0.0418394	Adra2a/Adrb1/Adgrg3/Grk5/Adora2a/Pde4b/Ptgir/Gnaq/Mc1r/Adora2b/Calca/Adgrg6/Ramp3/Htr7/Ptger4/Cxcl10
C0_cDC2	GO:0043370	regulation of CD4-positive, alpha-beta T cell differentiation	28	-1.77739	0.013928	0.0466458	Sh3rf1/Jak3/Nfkbiz/Il4ra/Cd83/Nfkbid/Malt1/Ccr2/Gata3/Runx1/Socs1
C0_cDC2	GO:1905475	regulation of protein localization to membrane	66	-1.77806	0.00587474	0.0247192	Lrp4/Epha2/Cltc/Ptpn9/Dbn1/Cd81/Picalm/Rangrf/Pik3r2/Prnp/Fyn/Lrp1/Tnf/Tmbim1/Itgb1/Cacnb3/Stx3/Mmp14/Ccl2/Ramp3/Dab2
C0_cDC2	GO:0010565	regulation of cellular ketone metabolic process	42	-1.77863	0.0100079	0.0369604	Acadvl/Cav1/Wnt4/Bmp2/Irs2/Cd74/Dgat1/Nucb2/Pla2g4a/Egr1/Il1b/Comt/Nr4a3/Fabp5/Dab2
C0_cDC2	GO:0046651	lymphocyte proliferation	131	-1.77951	0.00161146	0.00971665	Clec4g/Tlr4/Itgam/Wnt4/Il5/Irs2/Stat5a/Lrrc32/Sh3rf1/Cd74/Jak3/Cd81/Arg1/Tgfbr2/Pnp/P2rx7/Bst1/Cd86/Icosl/Slc39a10/Cd79a/Prnp/Fyn/Prkcd/Il1b/Cd80/Malt1/Ccr2/Cd1d1/Slfn1/Cd209e/Cd40/Tnfsf9/Cd274/Il12b/Sdc4/Scgb1a1/Il2ra/Pdcd1lg2/Il7r/Cdkn1a/Aif1/Fcgr2b/Cd209a
C0_cDC2	GO:0010975	regulation of neuron projection development	202	-1.77979	0.000622374	0.00484258	Itsn1/Klk8/Cyfip1/S100a9/Il1rap/Lrp4/Ret/Hspa5/Dpysl2/Ulk4/Braf/Scn1b/Ptpn9/Sema6d/Dbn1/Picalm/Thy1/Plxnd1/Pdlim5/Bmpr2/Ptprs/Nf1/Fn1/Igf1r/Myo9a/Apoe/Cdc20/Arsb/Plxna4/Rbpj/Nsmf/D16Ertd472e/Smurf1/Lpar3/Nfe2l2/Camsap2/Lif/Fyn/Ccdc88a/Fgfr1/Ngfr/Lrp1/Inppl1/Itm2c/Gata3/Ehd1/Sema4c/Plk2/Cx3cl1/Itgb1/Skil/Sema4a/Cflar/Tubb2b/Tnfrsf12a/Rap2a/Olfm1/Afdn/Plxna1/Htr7/Ccr5/Dab2
C0_cDC2	GO:0032872	regulation of stress-activated MAPK cascade	90	-1.78037	0.00370416	0.0176803	Gadd45g/App/Rell1/Hipk2/Il1b/Tnf/Sema4c/Tlr3/Lmnb1/Nod2/Gadd45b/Rap2a/Il1rn/Trf/Il1a/Fcgr2b/Dab2
C0_cDC2	GO:0009725	response to hormone	202	-1.78063	0.000602925	0.00474269	Zfp703/Cyfip1/Ptpn2/Cav1/Rab8b/Uso1/Ubr5/Irs2/Stat5a/Braf/Gatm/Acod1/Cad/Jak2/Ass1/Npc1/Igf1r/Soga1/Rxra/Timp1/Nucb2/Egr1/Pik3r2/Sesn2/Nsmf/Atp1a1/Zfp366/P2ry6/Calr/Cav2/Prkcd/Serpina3g/Inppl1/Cfb/Serpina3f/Il1b/Tnf/Src/Prkca/Cflar/Mmp14/Timp2/Fosl2/Cyp7b1/Klf9/Ramp3/Socs1/Socs3/Socs2/Htr7/Il1rn/Nr4a3/Ptger4/Egr2/Cish/Dab2
C0_cDC2	GO:0051924	regulation of calcium ion transport	98	-1.78112	0.00313239	0.0159421	Adrb1/Cav1/Tspo/Ccl12/Ank2/Pkd2/Jak3/Plcg1/Gpr35/Adora2a/Thy1/P2rx7/Pde4b/Icam1/Ms4a2/Epb41/Rem1/P2ry6/Lpar3/Prnp/Orai1/Fyn/Pdgfb/Cacnb2/F2r/Asph/Chd7/Atp1b1/Kcne3/Clec4b1/Cx3cl1/Cacnb3/Cd84/Vdr/Ramp3/Ccr1/Cxcl10
C0_cDC2	GO:0022408	negative regulation of cell-cell adhesion	83	-1.78116	0.00389979	0.0183065	Zfp703/Clec4g/Ptpn2/Bmp2/Lrrc32/Cd74/Jak3/Arg1/Adora2a/Jak2/Ass1/Epcam/Il4ra/Cd86/Prnp/Tnfaip3/Nfkbid/Wnk1/Prkcd/Hfe/Cd80/Slfn1/Runx1/Cd274/Sdc4/Scgb1a1/Il2ra/Pdcd1lg2/Socs1/Il1rn/Cdh1
C0_cDC2	GO:0032663	regulation of interleukin-2 production	33	-1.78162	0.012817	0.0442288	Stat5a/Pde4b/Il17f/Cd83/Prnp/Tnfaip3/Il1b/Malt1/Ccr2/Gata3/Cd1d1/Nod2/Runx1/Il1a
C0_cDC2	GO:0046425	regulation of JAK-STAT cascade	49	-1.78175	0.008347	0.0321454	Ptpn2/Cav1/Ret/Il5/Csf1r/Sac3d1/Il10ra/Vhl/Jak2/Lif/Fyn/Pigu/Tnf/Cd40/Il12b/Socs1/Socs3/Socs2/Gfra2/Ptger4
C0_cDC2	GO:0008625	extrinsic apoptotic signaling pathway via death domain receptors	30	-1.78221	0.0130709	0.0447641	Nf1/Icam1/Bag3/Ddx3x/Tnfaip3/Tnf/Tmbim1/Skil/Cflar/Pea15a/Dapk1
C0_cDC2	GO:0030036	actin cytoskeleton organization	251	-1.78223	0.000212044	0.002113	Cdc42bpg/Cyfip1/S100a9/Cdc42bpb/Wnt4/Cnn3/Ablim3/Tlr2/Spire1/Csf1r/Braf/Vasp/Ophn1/Dbn1/Pdlim5/Pdlim4/S1pr1/Enah/Nf1/Nedd9/Bst1/Capg/Marcks/Pik3r2/Icam1/Plek/Rflnb/Palld/Eps8/Epb41/Synpo/Fgd1/Pdlim1/Gas7/Pdlim7/Calr/Diaph3/Pdgfb/Itgb5/Ccdc88a/Prkcd/Casp4/Lrp1/Inppl1/Hsp90b1/Tnf/Pls3/Fmnl2/Tgfbr1/Scin/Src/Pacsin2/Parvb/Fscn1/Lima1/Cx3cl1/Csrp1/Itgb1/Hip1/Cgnl1/Rhoc/Cflar/Arhgap18/Actn1/Rap2a/Sdc4/…
C0_cDC2	GO:0030282	bone mineralization	33	-1.78262	0.0127327	0.0440448	Wnt10b/Zmpste24/Wnt4/Srgn/Bmp2/Mgp/Bmpr2/P2rx7/S1pr1/Sbno2/Ltbp3/Rflnb/Bmp2k/Isg15/Hif1a/Ccr1/Mtss1
C0_cDC2	GO:0019216	regulation of lipid metabolic process	124	-1.78414	0.00191843	0.0110436	Adra2a/Psap/Vav3/Acadvl/Zmpste24/Cav1/Tspo/Wnt4/Bmp2/Sec14l2/Irs2/Stat5a/Cd74/Cd81/Dgat1/Capn2/Igf1r/Nucb2/Pla2g4a/Apoe/Egr1/Pik3r2/Atp1a1/Sct/Pdgfb/Apod/Prkcd/Flt1/Il1b/Tnf/Src/Adora2b/Hrh1/Ttc39b/Nod2/Vdr/Rora/Nr4a3/Fabp5/Il1a/Dab2
C0_cDC2	GO:0015837	amine transport	26	-1.78509	0.0137791	0.0462014	Entpd1/Dpysl2/Arg1/Adora2a/P2ry1/P2rx7/Kmo/Il1b/Tnf/Adora2b/Stk39/Il1rn
C0_cDC2	GO:0030278	regulation of ossification	91	-1.78583	0.0033888	0.0167669	Zmpste24/Cebpd/Lrp4/Wnt4/Srgn/Bmp2/Mgp/Zbtb16/Bmpr2/P2rx7/Ctnnbip1/S1pr1/Ltbp3/Rbpj/Rflnb/Smurf1/Fndc3b/Pdlim7/Ifi204/Fgfr1/Bmp2k/Isg15/Tnf/Dhrs3/Csf1/Ski/Calca/Hif1a/Rsad2/Ccr1/Ptger4/Egr2
C0_cDC2	GO:0033674	positive regulation of kinase activity	182	-1.78675	0.00066492	0.00502227	Map4k3/Cacul1/Il23a/Nbn/Rptor/Dlg1/Cenpe/Map2k5/Shc1/Map3k20/Iqgap1/Stk3/Pik3cg/Map2k3/Map4k1/Cass4/Adra2a/Vav3/Rasgrp1/Tnfrsf11a/Map4k5/Clu/Camkk1/Tlr4/Ret/Mdfic/Pih1d1/Bmp2/Ppp2r3c/Csf1r/Pkd2/Maged1/Cd74/Cd81/Tgfbr2/P2rx7/Jak2/Irgm2/Nedd9/Map3k14/Egr1/Ddx3x/Lpar3/Prnp/Ralb/Gadd45g/Pdgfb/Ccdc88a/Prkcd/Fgfr1/F2r/Flt1/Kitl/Il1b/Tnf/Csf1/Malt1/Tgfbr1/Src/Cd40/Nod2/Gadd45b/Il12b/Sdc4/Socs1/Ccnd2/Cdk…
C0_cDC2	GO:0072593	reactive oxygen species metabolic process	108	-1.78699	0.0023422	0.0129162	Tlr4/Itgam/Cav1/Tspo/Tlr2/Gch1/Pkd2/Cycs/Tgfbr2/Acod1/P2rx7/Jak2/Ass1/Plau/Icam1/Sesn2/Nqo2/Nfe2l2/Birc3/Fyn/Pdgfb/Prkcd/Ier3/Ngfr/Il1b/Tnf/Cxcl1/Txnrd1/Hrh1/Tmem106a/Hif1a/Cflar/Hk2/Rora/Cdkn1a/Aif1/Ptger4/Sh3pxd2b
C0_cDC2	GO:0060560	developmental growth involved in morphogenesis	86	-1.78944	0.0034195	0.0168017	Sema6d/Dbn1/Tgfbr2/Picalm/Bmpr2/Ptprs/S1pr1/Fn1/Apoe/Plxna4/Smurf1/Lpar3/App/Lrp1/Csf1/Sema4c/Itgb1/Sema4a/Nrp2/Tnfrsf12a/Olfm1/Afdn/Plxna1/Flrt3/Ccr5
C0_cDC2	GO:1905952	regulation of lipid localization	45	-1.78965	0.00891834	0.0338611	Apoc2/Tnfrsf11a/Ptpn2/Kdm5b/Irs2/Dgat1/P2rx7/Nucb2/Apoe/Hilpda/Hrh2/Prkcd/Lrp1/Il1b/Ehd1/Ttc39b/Runx1/Il1a/Dab2
C0_cDC2	GO:0046889	positive regulation of lipid biosynthetic process	37	-1.7901	0.0107611	0.0386854	Wnt4/Sec14l2/Cd74/Dgat1/Capn2/Igf1r/Pla2g4a/Apoe/Prkcd/Il1b/Tnf/Adora2b/Il1a/Dab2
C0_cDC2	GO:0050863	regulation of T cell activation	152	-1.79157	0.000888538	0.00624616	Stat5a/Braf/Lrrc32/Sh3rf1/Zbtb16/Clptm1/Cd74/Jak3/Cd81/Arg1/Tgfbr2/Adora2a/Thy1/Nfkbiz/Pnp/Il4ra/Cd83/Cd86/Icosl/Prnp/Nfkbid/Ctla2a/Hfe/Il1b/Cd80/Malt1/Ccr2/Gata3/Il1rl2/Cd1d1/Egr3/Slfn1/Cd209e/Tnfsf9/Runx1/Cd274/Il12b/Ccl2/Sdc4/Scgb1a1/Il2ra/Pdcd1lg2/Il7r/Socs1/Aif1/Cd209a
C0_cDC2	GO:0032680	regulation of tumor necrosis factor production	85	-1.79203	0.00350184	0.0170587	Mc1r/Tnfaip3/App/Ptafr/Ccr2/Tlr3/Cx3cl1/Ddt/Arid5a/Cd84/Cd209b/Nod2/Il12b/Ccl2/Fcgr3/Cd14/Ccr5/Ptger4/Axl
C0_cDC2	GO:1901343	negative regulation of vasculature development	49	-1.79247	0.00764104	0.0300978	Wnt4/Epha2/Stab1/Hhex/Il17f/Nf1/Pik3r2/Col4a2/Lif/Pdgfb/Ngfr/Ccr2/Plk2/Sema4a/Ccl2/Spred1/Ptger4/Cxcl10
C0_cDC2	GO:0060284	regulation of cell development	350	-1.79276	3.78508e-05	0.000543678	Adrb1/Itsn1/Klk8/Cyfip1/S100a9/Il1rap/Lrp4/Cav1/Tspo/Ret/Il5/Hspa5/Tlr2/Dpysl2/Gata2/Ulk4/Bmp2/Braf/Scn1b/Ptpn9/Sema6d/Dbn1/Picalm/Thy1/Plxnd1/Pdlim5/Ttc3/Bmpr2/Ptprs/Nf1/Fn1/Nedd9/Igf1r/Zfhx3/Myo9a/Apoe/Slamf8/Cdc20/Arsb/Plxna4/Rbpj/Rflnb/Nsmf/Aspm/D16Ertd472e/Dock7/Smurf1/Lpar3/Nfe2l2/Camsap2/Calr/Dock1/Lif/Fyn/App/Ccdc88a/Fgfr1/Kdr/Ngfr/Lrp1/Inppl1/Itm2c/Il1b/Chd7/Tnf/Csf1/Ski/Ccr2/Gata3/Ehd1/…
C0_cDC2	GO:0051209	release of sequestered calcium ion into cytosol	37	-1.79284	0.0105715	0.038442	Ank2/Pkd2/Plcg1/Thy1/P2rx7/Ms4a2/P2ry6/F2r/Asph/Chd7/Clec4b1/Cx3cl1/Ccr5/Cxcl10
C0_cDC2	GO:0030193	regulation of blood coagulation	27	-1.79497	0.0131035	0.0447641	Tlr4/S100a9/Cav1/Apoe/Plau/Plek/Enpp4/Nfe2l2/Pdgfb/Prkcd/F2r/Prkca/Pdpn/Pros1
C0_cDC2	GO:1900046	regulation of hemostasis	27	-1.79497	0.0131035	0.0447641	Tlr4/S100a9/Cav1/Apoe/Plau/Plek/Enpp4/Nfe2l2/Pdgfb/Prkcd/F2r/Prkca/Pdpn/Pros1
C0_cDC2	GO:0019933	cAMP-mediated signaling	49	-1.79537	0.00753722	0.029813	Adrb1/Adgrg3/Grk5/Pde2a/Adora2a/Pde4b/Nucb2/Ptgir/Gnaq/Sct/Mc1r/Ece1/Adora2b/Calca/Adgrg6/Ramp3/Htr7/Ptger4/Cxcl10
C0_cDC2	GO:0007259	JAK-STAT cascade	56	-1.79671	0.00587517	0.0247192	Ptpn2/Cav1/Ret/Il5/Csf1r/Pkd2/Stat5a/Sac3d1/Jak3/Il10ra/Vhl/Jak2/Lif/Fyn/Pigu/Tnf/Cd40/Il12b/Socs1/Socs3/Socs2/Gfra2/Ptger4
C0_cDC2	GO:0032944	regulation of mononuclear cell proliferation	111	-1.79718	0.00223813	0.0124549	H2-Ab1/Btla/Sos2/Cd3e/Tarm1/Znhit1/Vav3/Clec4g/Tlr4/Il5/Irs2/Stat5a/Lrrc32/Sh3rf1/Cd74/Jak3/Cd81/Arg1/Tgfbr2/Pnp/Bst1/Cd86/Icosl/Slc39a10/Prnp/Il1b/Csf1/Cd80/Ccr2/Cd1d1/Slfn1/Cd209e/Cd40/Tnfsf9/Cd274/Il12b/Sdc4/Scgb1a1/Il2ra/Pdcd1lg2/Cdkn1a/Aif1/Fcgr2b/Cd209a
C0_cDC2	GO:0072678	T cell migration	30	-1.79842	0.0117406	0.0413689	S1pr1/Icam1/App/Apod/Wnk1/Ccr2/Ccl2/Cxcl16/Cd200r1/Stk39/Aif1/Cxcl10
C0_cDC2	GO:0002763	positive regulation of myeloid leukocyte differentiation	36	-1.79863	0.0103514	0.0380312	Il5/Csf1r/Stat5a/Cd74/Ctnnbip1/Lif/Kitl/Tnf/Csf1/Prkca/Runx1/Il12b/Dcstamp/Trib1/Ccr1
C0_cDC2	GO:0050767	regulation of neurogenesis	303	-1.79968	0.000114447	0.00125494	Itsn1/Klk8/Cyfip1/S100a9/Il1rap/Lrp4/Cav1/Tspo/Ret/Hspa5/Tlr2/Dpysl2/Gata2/Ulk4/Bmp2/Braf/Scn1b/Ptpn9/Sema6d/Dbn1/Picalm/Thy1/Plxnd1/Pdlim5/Ttc3/Bmpr2/Ptprs/Nf1/Fn1/Igf1r/Zfhx3/Myo9a/Apoe/Cdc20/Arsb/Plxna4/Rbpj/Nsmf/Aspm/D16Ertd472e/Dock7/Smurf1/Lpar3/Nfe2l2/Camsap2/Calr/Lif/Fyn/App/Ccdc88a/Fgfr1/Kdr/Ngfr/Lrp1/Inppl1/Itm2c/Il1b/Chd7/Tnf/Csf1/Ski/Ccr2/Gata3/Ehd1/Sema4c/Nrep/Ctnna1/Plk2/Cx3cl1/Itgb…
C0_cDC2	GO:0030500	regulation of bone mineralization	27	-1.80046	0.0125946	0.0437806	Acvr1/Wnt10b/Zmpste24/Wnt4/Srgn/Bmp2/Mgp/Bmpr2/P2rx7/S1pr1/Ltbp3/Rflnb/Bmp2k/Isg15/Hif1a/Ccr1
C0_cDC2	GO:0007420	brain development	177	-1.8009	0.000605824	0.00474269	Sptbn2/Cd3e/Inhba/Rac3/Pomk/Pfdn1/Htt/Nnat/Mafb/Zswim6/Sept4/Atf5/Kdm6b/Wnt4/Hspa5/Dpysl2/Gata2/Ulk4/Spef2/Hhex/Bmp2/Csf1r/Irs2/Ophn1/Sema6d/Tgfbr2/Ptprs/S1pr1/Nf1/Igf1r/Zfhx3/Slc4a7/Plxna4/Rbpj/Aspm/Gnaq/D16Ertd472e/Dock7/Sct/Fyn/App/Kif1a/Fgfr1/Chd7/Ski/Zbtb18/Sema4c/Src/Bhlhe22/Itgb1/Hif1a/Aplp2/Nrp2/Syne2/Rora/Wls/Afdn/Aldh1a2/Nr4a3/Axl/Egr2/Fcgr2b
C0_cDC2	GO:0046849	bone remodeling	39	-1.80116	0.00941117	0.0351681	Epha2/Csf1r/Plekhm1/Idua/P2rx7/Ctss/S1pr1/Nf1/Ltbp3/Src/Prkca/Gpr55/Dcstamp/Ptger4/Trf
C0_cDC2	GO:0070665	positive regulation of leukocyte proliferation	69	-1.80293	0.00488305	0.0215006	Irs2/Stat5a/Cd74/Jak3/Cd81/Tgfbr2/Pnp/Bst1/Cd86/Icosl/Slc39a10/Kitl/Il1b/Csf1/Cd80/Ccr2/Cd1d1/Cd209e/Cd40/Tnfsf9/Cd274/Il12b/Il2ra/Pdcd1lg2/Cdkn1a/Aif1
C0_cDC2	GO:0043277	apoptotic cell clearance	17	-1.80303	0.0147821	0.0488153	Lrp1/Ccr2/Ccl2/Mfge8/Axl
C0_cDC2	GO:0035710	CD4-positive, alpha-beta T cell activation	59	-1.80318	0.00538322	0.0231389	Braf/Sh3rf1/Jak3/Cd81/Tgfbr2/Nfkbiz/Il4ra/Cd83/Gadd45g/Nfkbid/Malt1/Ccr2/Gata3/Sema4a/Rsad2/Runx1/Cd274/Rora/Il12b/Socs1/Ptger4
C0_cDC2	GO:0006024	glycosaminoglycan biosynthetic process	18	-1.8033	0.0144156	0.0477717	Hexa/Cltc/Dse/Ext2/Pdgfb/Il1b/Chst7/Chst11/Ptger4
C0_cDC2	GO:0006066	alcohol metabolic process	116	-1.80369	0.00174618	0.0102887	Gch1/Bmp2/Sec14l2/Slc37a2/Slc5a3/Plcg1/Hsd3b7/P2ry1/Inpp5e/Npc1/Apoe/Plpp1/Acer3/Plek/Dhcr24/P2ry6/App/Fgfr1/Lrp1/Inppl1/Il1b/Tnf/Dhrs3/Ptafr/Lima1/Ttc39b/Ocrl/Vdr/Aplp2/Cyp7b1/Naaa/Myof/Got1/Dab2
C0_cDC2	GO:0055008	cardiac muscle tissue morphogenesis	15	-1.80379	0.0149872	0.0492635	Zfpm1/Bmp2/S1pr1/Rxra/Rbpj/Eng/Chd7/Tgfbr1
C0_cDC2	GO:0045445	myoblast differentiation	28	-1.80389	0.0118293	0.0415782	Zfhx3/Rbpj/Tnf/Cxcl10/Cxcl9/Ccl17
C0_cDC2	GO:0046632	alpha-beta T cell differentiation	66	-1.80428	0.00476552	0.0211801	Braf/Sh3rf1/Zbtb16/Jak3/Tgfbr2/Nfkbiz/Pnp/Il4ra/Cd83/Gadd45g/Nfkbid/Malt1/Ccr2/Gata3/Itk/Cd1d1/Sema4a/Rsad2/Runx1/Rora/Il12b/Socs1/Ptger4
C0_cDC2	GO:0007417	central nervous system development	252	-1.80472	0.000192515	0.0019667	Rac3/Pomk/Pfdn1/Htt/Nnat/Mafb/Zswim6/Sept4/Atf5/Clu/Kdm6b/Tlr4/S100a9/Itgam/Wnt4/Hspa5/Tlr2/Dpysl2/Gata2/Ulk4/Spef2/Hhex/Bmp2/Csf1r/Irs2/Exoc4/Scn1b/Ophn1/B4galt5/Zbtb16/Sema6d/Tgfbr2/Adora2a/Ptprs/S1pr1/Nf1/Igf1r/Zfhx3/Pbx3/Vcan/Arsa/Slc4a7/Arsb/Plxna4/Rbpj/Aspm/Gnaq/D16Ertd472e/Dock7/Sct/Lif/Fyn/App/Kif1a/Fgfr1/Ngfr/Eng/Lrp1/Il1b/Chd7/Ski/Zbtb18/Sema4c/Src/Prkca/Bhlhe22/Itgb1/B4galt6/Hif1a/Nav2…
C0_cDC2	GO:0060401	cytosolic calcium ion transport	56	-1.80845	0.0055028	0.0235716	Htt/Adrb1/Cav1/Ank2/Pkd2/Plcg1/Thy1/P2rx7/Ms4a2/P2ry6/Prnp/Fyn/F2r/Asph/Chd7/Mcub/Clec4b1/Cx3cl1/Cacnb3/Ramp3/Ccr5/Cxcl10
C0_cDC2	GO:0022604	regulation of cell morphogenesis	179	-1.80854	0.000547988	0.00442127	Fmnl3/Zswim6/Zmpste24/Cyfip1/Lrp4/Ret/Ccl12/Dpysl2/Csf1r/Braf/Sema6d/Dbn1/Picalm/Thy1/P2ry1/Plxnd1/Pdlim5/Ttc3/Bmpr2/Ptprs/Fn1/Nedd9/Myo9a/Apoe/Plxna4/Icam1/Nsmf/Eps8/Epb41/Smurf1/Lpar3/Fgd1/Gas7/Calr/Hexb/Dock1/Fyn/Kdr/Lrp1/Ago4/Fmnl2/Wtip/Sema4c/Src/Parvb/Skil/Pdpn/Rhoc/Sema4a/Arhgap18/Tubb2b/Tnfrsf12a/Ccl2/Rap2a/Olfm1/Afdn/Plxna1/Ccl24/Ccr5/Dab2
C0_cDC2	GO:0090092	regulation of transmembrane receptor protein serine/threonine kinase signaling pathway	71	-1.8091	0.00399279	0.018559	Inhba/Zfyve9/Zfp451/Zfp703/Cav1/Hspa5/Bmp2/Nup93/Bmpr2/Il17f/Rbpj/Smurf1/Cav2/Kdr/Hipk2/Eng/Hfe/Ski/Tgfbr1/Nrep/Skil/Htra3/Chst11/Furin/Got1/Pmepa1/Dab2
C0_cDC2	GO:0007178	transmembrane receptor protein serine/threonine kinase signaling pathway	109	-1.81063	0.00189638	0.0109466	Nlk/Inhba/Zfyve9/Hexa/Zfp451/Rgmb/Zfp703/Cav1/Hspa5/Bmp2/Nup93/Lrrc32/Tgfbr2/Bmpr2/Il17f/Ltbp3/Egr1/Rbpj/Smurf1/Cav2/Itgb5/Kdr/Nceh1/Hipk2/Eng/Hfe/Ski/Tgfbr1/Src/Nrep/Skil/Htra3/Chst11/Furin/Ccl2/Got1/Pmepa1/Trf/Dab2
C0_cDC2	GO:1990138	neuron projection extension	68	-1.81153	0.00437273	0.0199015	Sema6d/Dbn1/Picalm/Bmpr2/Ptprs/Fn1/Apoe/Plxna4/Smurf1/Lrp1/Sema4c/Itgb1/Sema4a/Nrp2/Tnfrsf12a/Olfm1/Afdn/Plxna1/Flrt3/Ccr5
C0_cDC2	GO:0043030	regulation of macrophage activation	16	-1.81236	0.0149665	0.0492524	Myo18a/Tlr4/Ctsc/Il4ra/Cx3cl1/Cd1d1/Cd84/Rora/Il1rl1
C0_cDC2	GO:1905521	regulation of macrophage migration	14	-1.8125	0.0152899	0.0499692	Cd81/Slamf8/Csf1/Cx3cl1/Ddt/Mmp14/C3ar1/Ccl2/Cd200r1
C0_cDC2	GO:1903510	mucopolysaccharide metabolic process	19	-1.814	0.0133759	0.0451983	Cltc/Dse/Idua/Pdgfb/Il1b/Chst7/Chst11/Ptger4
C0_cDC2	GO:0002431	Fc receptor mediated stimulatory signaling pathway	10	-1.81406	0.0152388	0.0499173	Plscr1/Cd226/Nr4a3/Fcgr2b
C0_cDC2	GO:0007249	I-kappaB kinase/NF-kappaB signaling	82	-1.81414	0.00320644	0.0161746	Tnfaip3/Nfkbid/Fyn/Il1b/Tnf/Malt1/Tlr3/Cx3cl1/Tmem106a/Nod2/Rora/Il1rn/Tnip3/Il1rl1/Clec4n/Il1a
C0_cDC2	GO:0043302	positive regulation of leukocyte degranulation	12	-1.81459	0.0151835	0.0497936	Gab2/Itgam/Gata2/Il4ra/Ms4a2/Ptafr/Adora2b/Adora3
C0_cDC2	GO:0032943	mononuclear cell proliferation	132	-1.81476	0.00095473	0.00653357	Clec4g/Tlr4/Itgam/Wnt4/Il5/Irs2/Stat5a/Lrrc32/Sh3rf1/Cd74/Jak3/Cd81/Arg1/Tgfbr2/Pnp/P2rx7/Bst1/Cd86/Icosl/Slc39a10/Cd79a/Prnp/Fyn/Prkcd/Il1b/Csf1/Cd80/Malt1/Ccr2/Cd1d1/Slfn1/Cd209e/Cd40/Tnfsf9/Cd274/Il12b/Sdc4/Scgb1a1/Il2ra/Pdcd1lg2/Il7r/Cdkn1a/Aif1/Fcgr2b/Cd209a
C0_cDC2	GO:0071241	cellular response to inorganic substance	56	-1.81522	0.00529593	0.0228624	Pkd2/Braf/Fn1/Ddi2/Nfe2l2/Prnp/Slc25a24/Wnk1/Asph/Hfe/Cpne2/Slc41a1/Cflar/Clic4/Mt1/Cdh1/Trf/Mt2
C0_cDC2	GO:0048675	axon extension	46	-1.81635	0.00725438	0.0292233	Cyfip1/Dpysl2/Sema6d/Dbn1/Bmpr2/Ptprs/Fn1/Apoe/Plxna4/Lrp1/Sema4c/Itgb1/Sema4a/Nrp2/Tnfrsf12a/Olfm1/Ccr5
C0_cDC2	GO:0097435	supramolecular fiber organization	230	-1.81674	0.000231898	0.00225914	Pdlim4/S1pr1/Enah/Nf1/P4ha1/Nedd9/Rangrf/Apoe/Capg/Marcks/Pik3r2/Icam1/Plek/Rflnb/Eps8/Synpo/Colgalt1/Gas7/Camsap2/App/Diaph3/Itgb5/Ccdc88a/Prkcd/Casp4/Inppl1/Hsp90b1/Pls3/Tgfbr1/Scin/Src/Fscn1/Lima1/Cx3cl1/Csrp1/Itgb1/Hip1/Cgnl1/Rhoc/Cflar/Arhgap18/Cst3/Actn1/Sdc4/Ccl24/Aif1/Mtss1/Gda/Dst/Ptger4/Trf/Sh3pxd2b
C0_cDC2	GO:0032233	positive regulation of actin filament bundle assembly	27	-1.81678	0.0115557	0.0408185	Wnt4/Braf/Pdlim4/Plek/Synpo/Tgfbr1/Cx3cl1/Rhoc/Sdc4/Mtss1/Sh3pxd2b
C0_cDC2	GO:0048010	vascular endothelial growth factor receptor signaling pathway	12	-1.81694	0.0148632	0.0490262	Hhex/Pdgfb/Kdr/Flt1/Hif1a/Ccl2/Myof
C0_cDC2	GO:0072576	liver morphogenesis	10	-1.81868	0.0146626	0.0484769	Plau/Tnfaip3/Mki67/Sulf2/Cflar
C0_cDC2	GO:0043405	regulation of MAP kinase activity	116	-1.81868	0.00154547	0.0093585	Shc1/Map3k20/Iqgap1/Pik3cg/Map2k3/Map4k1/Paqr3/Adra2a/Rasgrp1/Tnfrsf11a/Tlr4/Cav1/Ret/Mdfic/Bmp2/Maged1/Hipk3/Cd74/Cd81/P2rx7/Jak2/Nf1/Igf1r/Apoe/Lpar3/Gadd45g/Pdgfb/Prkcd/Fgfr1/F2r/Flt1/Kitl/Inppl1/Il1b/Tnf/Tgfbr1/Src/Prkca/Cd40/Nod2/Gadd45b/Spred1/Stk39/Il1rn/Trib1/Trf/Dab2
C0_cDC2	GO:0051279	regulation of release of sequestered calcium ion into cytosol	27	-1.81871	0.0114285	0.0404698	Ank2/Pkd2/Plcg1/Thy1/Ms4a2/P2ry6/F2r/Asph/Chd7/Clec4b1/Cx3cl1/Cxcl10
C0_cDC2	GO:0019935	cyclic-nucleotide-mediated signaling	54	-1.81925	0.00527874	0.0228624	Adrb1/Adgrg3/Grk5/Pde2a/Adora2a/Pde4b/Npr1/Nucb2/Ptgir/Apoe/Gnaq/Sct/Mc1r/Ece1/Adora2b/Calca/Adgrg6/Ramp3/Htr7/Ptger4/Cxcl10
C0_cDC2	GO:1902041	regulation of extrinsic apoptotic signaling pathway via death domain receptors	19	-1.8201	0.0126944	0.0440084	Icam1/Tnfaip3/Tmbim1/Skil/Cflar/Pea15a/Dapk1
C0_cDC2	GO:0061383	trabecula morphogenesis	15	-1.8202	0.0135995	0.0457072	Wnt10b/S1pr1/Sbno2/Rbpj/Eng/Chd7/Tgfbr1/Adgrg6
C0_cDC2	GO:0001894	tissue homeostasis	80	-1.82095	0.00310141	0.0158703	Rac3/Tnfrsf11a/Spata7/Tlr4/Vps54/Gata2/Csf1r/Plekhm1/Idua/Vhl/P2rx7/Ctss/S1pr1/Nf1/Ltbp3/Pla2g4a/Pde6a/Kdr/F2r/Csf1/Ccr2/Iqcb1/Src/Prkca/Itgb1/Nod2/Gpr55/Stk39/Dcstamp/Ptger4/Trf
C0_cDC2	GO:2000181	negative regulation of blood vessel morphogenesis	44	-1.82101	0.00707857	0.0285962	Wnt4/Epha2/Stab1/Hhex/Il17f/Nf1/Pik3r2/Col4a2/Lif/Ngfr/Ccr2/Plk2/Sema4a/Ccl2/Spred1/Ptger4/Cxcl10
C0_cDC2	GO:0099024	plasma membrane invagination	27	-1.82188	0.0112164	0.0399682	Gata2/Spire1/Snx18/Siglece/Fcgr3/Mfge8/Fcgr1/Aif1/Fcgr2b
C0_cDC2	GO:0019886	antigen processing and presentation of exogenous peptide antigen via MHC class II	10	-1.82284	0.0143211	0.0475694	H2-DMa/H2-Aa/H2-Eb1/Ifi30/H2-DMb2/H2-Ab1/H2-DMb1/Cd74/Fcgr2b
C0_cDC2	GO:0001667	ameboidal-type cell migration	141	-1.82315	0.000732949	0.00537875	Epha2/Ret/Gata2/Stat5a/Braf/Tns1/Sema6d/Plcg1/Tgfbr2/Vhl/Plxnd1/Bmpr2/Nf1/Fn1/Timp1/Apoe/Arsb/Pik3r2/Nfe2l2/Jup/Calr/Dock1/Prr5l/Pdgfb/Fgfr1/Kdr/Kitl/Gata3/Ets1/Hbegf/Tgfbr1/Sema4c/Src/Adora2b/Plk2/Prkca/Itgb1/Egr3/Hif1a/Sema4a/Cd40/Nrp2/Syne2/Sdc4/Cd63/Spred1/Mmp12
C0_cDC2	GO:0086004	regulation of cardiac muscle cell contraction	14	-1.82327	0.0142634	0.0474334	Dlg1/Adrb1/Cav1/Ank2/Pde4b/Rangrf/Atp1a1/Jup/Kcne3
C0_cDC2	GO:0071248	cellular response to metal ion	49	-1.82397	0.00622911	0.0258635	Nfe2l2/Prnp/Slc25a24/Wnk1/Asph/Hfe/Cpne2/Slc41a1/Clic4/Mt1/Cdh1/Trf/Mt2
C0_cDC2	GO:0071356	cellular response to tumor necrosis factor	65	-1.82405	0.00401235	0.018589	Tnfrsf11a/Ccl9/Tank/Ptpn2/Ccl12/Ybx3/Dbn1/Acod1/Smpd4/Jak2/Nfe2l2/Birc3/Casp4/Tnf/Cx3cl1/Rora/Tjp2/Ccl2/Ccl24/Dcstamp/Ccl22/Ccl17
C0_cDC2	GO:0050718	positive regulation of interleukin-1 beta secretion	14	-1.82448	0.0141565	0.0471883	Hk1/Usp50/Tlr4/Tlr2/P2rx7/Casp4/Nod2/Ccr5
C0_cDC2	GO:2001233	regulation of apoptotic signaling pathway	172	-1.82534	0.000469768	0.00388963	Htt/Bcl2l2/Sept4/Clu/Noc2l/S100a9/Ptpn2/Cav1/Wnt4/Ret/Pih1d1/Bcl2l14/Ybx3/Ctsc/Maged1/Sh3rf1/Bcl2a1c/Cd74/Deptor/Jak3/Adora2a/Bcl2a1b/Slc35f6/Vhl/Jak2/Nf1/Pdia3/Icam1/Ddx3x/Plscr1/Nfe2l2/Chchd10/Tnfaip3/Fyn/Hyou1/Prkcd/Fgfr1/Ier3/Ngfr/Itm2c/Bcl2a1d/Il1b/Tnf/Tgfbr1/Tmbim1/Src/Ctnna1/Cx3cl1/Tnfsf12/Skil/Fcmr/Hif1a/Cflar/Pea15a/Bcl2a1a/Tnfrsf12a/Dapk1/Dab2
C0_cDC2	GO:1903034	regulation of response to wounding	68	-1.82633	0.0040032	0.018577	Klk8/Tlr4/S100a9/Cav1/Wnt4/Braf/Ptprs/Igf1r/Apoe/Plau/Plek/Hopx/Enpp4/Nfe2l2/Pdgfb/Prkcd/P2rx5/F2r/Lrp1/Hbegf/Prkca/Pdpn/Tnfrsf12a/Ccl2/Pros1/Cdkn1a/Ptger4
C0_cDC2	GO:0050778	positive regulation of immune response	261	-1.82728	0.0001154	0.00126052	Tlr4/Ptpn2/Itgam/Cav1/Tlr2/Skint3/Gata2/Cd55/Stat5a/Braf/Cd74/Plcg1/Cd81/Pvr/Thy1/Acod1/Nfkbiz/Pnp/P2rx7/Ptprs/Pde4b/Nectin2/Irgm2/Rftn1/Il4ra/Cd86/Ms4a2/Icosl/Plscr1/Cfh/Slc39a10/Cd79a/Prnp/Cfp/Ifi204/Tnfaip3/Nfkbid/Fyn/Wnk1/Cfb/Bcl2a1d/Il1b/Tnf/Malt1/Ptafr/Ccr2/Gata3/Itk/Ifi211/Tlr3/Zbp1/Adora2b/Irgm1/Adora3/Cd1d1/Cacnb3/Arid5a/C3ar1/Cd40/Nod2/Rsad2/C1qc/Cd274/Cd226/Il12b/Fcgr3/Cd14/Ifi205/Fcgr…
C0_cDC2	GO:0045321	leukocyte activation	393	-1.82793	1.87557e-05	0.000372134	Clec4g/Tlr4/Ptpn2/Itgam/Cav1/Il11ra1/Wnt4/Il5/Adgrg3/Snap23/Tlr2/Gata2/Hhex/Ppp2r3c/Irs2/Stat5a/Braf/Ctsc/Lrrc32/Sh3rf1/Zbtb16/Clptm1/Cd74/Jak3/Cd81/Arg1/Tgfbr2/Adora2a/Thy1/Stx11/Nfkbiz/Pnp/P2rx7/Jak2/Nectin2/Bst1/Sbno2/Il4ra/Cd83/Slamf8/Cd86/Egr1/Icam1/Nampt/Ms4a2/Rbpj/Icosl/Plscr1/Slc39a10/Atp11c/Lfng/Cd79a/Prnp/Tnfaip3/Gadd45g/Nfkbid/Fyn/App/Prkcd/Ctla2a/Pilrb1/Bcl2a1d/Jaml/Hfe/Il1b/Chd7/Tnf/…
C0_cDC2	GO:0051952	regulation of amine transport	24	-1.82823	0.0112457	0.0400224	Entpd1/Dpysl2/Arg1/Adora2a/P2ry1/P2rx7/Kmo/Il1b/Tnf/Adora2b/Stk39/Il1rn
C0_cDC2	GO:0043954	cellular component maintenance	27	-1.82847	0.0106015	0.0385017	Csf1r/Ophn1/Igf1r/Apoe/Chchd10/Prnp/Fyn/F2r/Afdn/Mtss1/Fcgr2b
C0_cDC2	GO:0046634	regulation of alpha-beta T cell activation	60	-1.82852	0.00439511	0.0199714	Blm/Prdm1/Ap3b1/Il23a/Zc3h12a/Nckap1l/H2-Ab1/Btla/Cd3e/Tarm1/Sh3rf1/Zbtb16/Jak3/Cd81/Tgfbr2/Adora2a/Nfkbiz/Pnp/Il4ra/Cd83/Nfkbid/Hfe/Cd80/Malt1/Ccr2/Gata3/Cd1d1/Runx1/Cd274/Il12b/Socs1
C0_cDC2	GO:1900076	regulation of cellular response to insulin stimulus	35	-1.82866	0.00866979	0.0330944	Prkcd/Inppl1/Il1b/Src/Prkca/Socs1/Socs3/Socs2/Cish
C0_cDC2	GO:0050730	regulation of peptidyl-tyrosine phosphorylation	101	-1.83063	0.00171773	0.0101632	Tlr4/Ptpn2/Lrp4/Cav1/Il5/Csf1r/Cd74/Cd81/Thy1/Jak2/Itga5/Nedd9/Bst1/Icam1/Prnp/Cav2/Lif/Fyn/App/Pdgfb/Prkcd/Kitl/Tnf/Cd80/Hbegf/Src/Prkca/Itgb1/Ctnnd1/Cd40/Nod2/Aplp2/Il12b/Socs1/Socs3/Fcgr1/Ptger4
C0_cDC2	GO:0032409	regulation of transporter activity	84	-1.83129	0.00261118	0.0139528	S100a1/Dlg1/Hk1/Mmp9/1810037I17Rik/Actb/Neto2/Htt/Adrb1/Cav1/Fxyd2/Ank2/Pkd2/Scn1b/Plcg1/Gpr35/Ctss/Pde4b/Rangrf/Rem1/P2ry6/Chchd10/Prnp/Wnk1/Prkcd/Cacnb2/Alox5/Asph/Ptafr/Atp1b1/Kcne3/Cox17/Prkca/Cacnb3/Ccl2/Cttnbp2nl/Stk39/Dapk1
C0_cDC2	GO:0002690	positive regulation of leukocyte chemotaxis	37	-1.83129	0.00806554	0.0313782	Calr/Wnk1/Il1b/Csf1/Ccr2/Cx3cl1/C3ar1/Ccl2/Stk39/Aif1/Ccr1/Cxcl10
C0_cDC2	GO:0002761	regulation of myeloid leukocyte differentiation	65	-1.83391	0.00366255	0.0175407	Cd101/Zfpm1/Mafb/Ptpn2/Il5/Gata2/Csf1r/Stat5a/Cd74/Tfe3/Ctnnbip1/Nf1/Lif/Kitl/Pilrb1/Tnf/Csf1/Prkca/C1qc/Runx1/Tjp2/Il12b/Gpr55/Dcstamp/Trib1/Ccr1
C0_cDC2	GO:0006882	cellular zinc ion homeostasis	10	-1.83476	0.0131472	0.0447699	Slc39a10/Mt1/Slc30a4/Mt2
C0_cDC2	GO:0072091	regulation of stem cell proliferation	22	-1.83729	0.010731	0.0386854	Nf1/Epcam/Ltbp3/Aspm/Fgfr1/Kitl/Cxcl1/Ctnna1/Cx3cl1/Hif1a
C0_cDC2	GO:0045780	positive regulation of bone resorption	16	-1.83752	0.0122337	0.0427877	Tnfrsf11a/Plekhm1/Idua/Ltbp3/Prkca/Dcstamp/Ptger4/Trf
C0_cDC2	GO:0046852	positive regulation of bone remodeling	16	-1.83752	0.0122337	0.0427877	Tnfrsf11a/Plekhm1/Idua/Ltbp3/Prkca/Dcstamp/Ptger4/Trf
C0_cDC2	GO:0035850	epithelial cell differentiation involved in kidney development	13	-1.83757	0.0128765	0.04438	Lif/Pdgfb/Myo1e/Gata3/Basp1/Mtss1
C0_cDC2	GO:0009968	negative regulation of signal transduction	444	-1.83825	1.86272e-05	0.000372134	Rcan1/Tlr4/Ptpn2/Prdm15/Lrp4/Cav1/Wnt4/Phlpp1/Epha2/Hspa5/Adgrg3/Gata2/Hhex/Pih1d1/Bmp2/Grk5/Ybx3/Pkd2/Pde2a/Hipk3/Sh3rf1/Sac3d1/Celf4/Hic1/Tmem88/Bcl2a1c/Cd74/Deptor/Arg1/Bcl2a1b/Thy1/Slc35f6/Vhl/Acod1/P2rx7/Ctnnbip1/Inpp5e/Ptprs/Pde4b/Nf1/Igf1r/Nucb2/Ptgir/Apoe/Egr1/Pik3r2/Icam1/Plek/Sesn2/Zfp366/Ddx3x/Smurf1/Litaf/Nfe2l2/Lfng/Prnp/Calr/Cav2/Tnfaip3/Prr5l/Lif/Nfkbid/Fyn/Hyou1/Apod/Prkcd/Ier3/Ng…
C0_cDC2	GO:0032890	regulation of organic acid transport	23	-1.83826	0.0104547	0.0381638	Tnfrsf11a/Dpysl2/Irs2/Arg1/Adora2a/P2rx7/Hrh2/Kmo/Il1b/Tnf/Stk39/Il1rn/Il1a
C0_cDC2	GO:0030182	neuron differentiation	443	-1.83888	1.8615e-05	0.000372134	Klk8/Cyfip1/S100a9/Il1rap/Lrp4/Cav1/Wnt4/Epha2/Ret/Epop/Hspa5/Dpysl2/Gata2/Ulk4/Bmp2/Spire1/Hdgfl3/Csf1r/Braf/Scn1b/Vasp/Ophn1/Ptpn9/B4galt5/Stxbp5/Sema6d/Dbn1/Adora2a/Picalm/Thy1/Vhl/Plxnd1/Pdlim5/Ttc3/Bmpr2/Ptprs/Jak2/Enah/Nf1/Fn1/Igf1r/Zfhx3/Pbx3/Myo9a/Plppr4/Apoe/Cdc20/Slc4a7/Arsb/Plxna4/Rbpj/Nsmf/Palld/Aspm/Gnaq/Pip5k1c/D16Ertd472e/Dock7/Smurf1/Lpar3/Nfe2l2/Gas7/Camsap2/Calr/Apbb2/Lif/Fyn/Ap…
C0_cDC2	GO:0055069	zinc ion homeostasis	11	-1.83935	0.0125801	0.0437806	Slc39a10/Mt1/Slc30a4/Mt2
C0_cDC2	GO:1901021	positive regulation of calcium ion transmembrane transporter activity	16	-1.84027	0.0119561	0.0419202	Cacnb4/Slc9a1/S100a1/Htt/Ank2/Pkd2/P2ry6/Cacnb2/Asph/Atp1b1/Kcne3/Cacnb3
C0_cDC2	GO:0046638	positive regulation of alpha-beta T cell differentiation	30	-1.84074	0.00876322	0.0333613	Zbtb16/Tgfbr2/Nfkbiz/Pnp/Il4ra/Cd83/Nfkbid/Malt1/Ccr2/Cd1d1/Runx1/Socs1
C0_cDC2	GO:0034612	response to tumor necrosis factor	76	-1.84171	0.00286621	0.0150463	Tnfrsf11a/Ccl9/Tank/Ptpn2/Ccl12/Gch1/Ybx3/Dbn1/Acod1/Smpd4/Jak2/Nfe2l2/Birc3/Casp4/Tnf/Cx3cl1/Rora/Tjp2/Ccl2/Cd14/Cxcl16/Ccl24/Dcstamp/Ccl22/Ccl17
C0_cDC2	GO:0050803	regulation of synapse structure or activity	76	-1.84228	0.00286621	0.0150463	Itsn1/Klk8/Cyfip1/Il1rap/Lrp4/Tlr2/Srgn/Dbn1/Picalm/Il10ra/Vhl/Pdlim5/Ptprs/Apoe/Cdc20/Prnp/Fyn/App/Nectin1/Tnf/Arhgap22/Prkca/Sema4a/Nrp2/Igsf9/Afdn/Flrt3/Fcgr2b
C0_cDC2	GO:0050795	regulation of behavior	20	-1.84231	0.0108861	0.0389867	Dbn1/Adora2a/Dgat1/Zfhx3/Apoe/Mc1r/Htr7/Nr4a3/Ptger4
C0_cDC2	GO:0032941	secretion by tissue	12	-1.84252	0.0126636	0.0439667	Sct/Wnk1/Adora3/Stk39/Ptger4
C0_cDC2	GO:0001508	action potential	25	-1.84312	0.00993905	0.0367538	Cav1/Ank2/Scn1b/Gpr35/Rangrf/Nup155/Gnaq/Jup/P2rx5/Cacnb2/Tnf/Kcne3/Cacnb3
C0_cDC2	GO:0002697	regulation of immune effector process	172	-1.84342	0.0003719	0.00324983	Zmpste24/Clec4g/Tlr4/Itgam/Il5/Tlr2/Gata2/Cd55/Stat5a/Cd74/Jak3/Cd81/Arg1/Pvr/Nfkbiz/Pnp/P2rx7/Nectin2/Il4ra/Slamf8/Ms4a2/Cfh/Tnfaip3/Nfkbid/Hfe/Il1b/Tnf/Malt1/Ptafr/Ccr2/Gata3/Cxcl1/Tlr3/Adora2b/Adora3/Cd1d1/Arid5a/Cd84/Cd40/Nod2/Rsad2/Cd226/Il12b/Ccl2/Serpinb9/Klrb1b/Il2ra/Fcgr3/Il7r/Gbp4/Fcgr1/Nr4a3/Fcgr2b/Mmp12
C0_cDC2	GO:0060402	calcium ion transport into cytosol	49	-1.84425	0.00529474	0.0228624	Htt/Adrb1/Cav1/Ank2/Pkd2/Plcg1/Thy1/P2rx7/Ms4a2/P2ry6/Prnp/Fyn/F2r/Asph/Chd7/Clec4b1/Cx3cl1/Cacnb3/Ramp3/Ccr5/Cxcl10
C0_cDC2	GO:0062012	regulation of small molecule metabolic process	126	-1.84469	0.000917962	0.00638426	Acadvl/Zmpste24/Entpd1/Ptpn2/Cav1/Tspo/Wnt4/Cltc/Bmp2/Sec14l2/Nln/Irs2/Pde2a/Cd74/P2ry1/Dgat1/P2rx7/Soga1/Nucb2/Pla2g4a/Apoe/Egr1/Plek/Sesn2/P2ry6/App/Pdgfb/Ppp1r3d/Ier3/Fam3c/Il1b/Tnf/Ptafr/Src/Adora2b/Comt/Hif1a/Ttc39b/Vdr/Rora/Nr4a3/Ptger4/Fabp5/Dab2
C0_cDC2	GO:0002688	regulation of leukocyte chemotaxis	45	-1.84507	0.00606364	0.0253246	Bst1/Slamf8/Calr/Wnk1/Il1b/Csf1/Ccr2/Cx3cl1/Ddt/C3ar1/Nod2/Ccl2/Stk39/Aif1/Ccr1/Cxcl10
C0_cDC2	GO:0060760	positive regulation of response to cytokine stimulus	22	-1.84583	0.0102847	0.0378351	Tlr4/Tlr2/Cd74/Irgm2/Casp4/Csf1/Zbp1/Irgm1/Axl/Mmp12
C0_cDC2	GO:0030225	macrophage differentiation	18	-1.84775	0.0106467	0.0385671	Ptpn2/Itgam/Tlr2/Gata2/Lif/App/Csf1/Prkca/C1qc/Trib1
C0_cDC2	GO:0008016	regulation of heart contraction	49	-1.84857	0.0050871	0.0221673	Hdac4/Sp4/Popdc2/Tmem65/S100a1/Zc3h12a/Dlg1/Adrb1/Zmpste24/Cav1/Gch1/Ank2/Scn1b/Pde4b/Jak2/Rangrf/Hopx/Nup155/Atp1a1/Jup/Cacnb2/Atp1b1/Kcne3/Hbegf/Prkca/Calca
C0_cDC2	GO:0050706	regulation of interleukin-1 beta secretion	18	-1.84893	0.0106254	0.0385391	Zc3h12a/Hk1/Usp50/Tlr4/Tlr2/P2rx7/Tnfaip3/Casp4/Nod2/Ccr5
C0_cDC2	GO:0032640	tumor necrosis factor production	87	-1.84915	0.0020528	0.0115904	Mc1r/Tnfaip3/App/Ptafr/Ccr2/Tlr3/Cx3cl1/Tmem106a/Ddt/Arid5a/Cd84/Cd209b/Nod2/Il12b/Ccl2/Fcgr3/Cd14/Ccr5/Ptger4/Axl
C0_cDC2	GO:2000106	regulation of leukocyte apoptotic process	51	-1.84953	0.00433592	0.019843	Irs2/Stat5a/Cd74/Jak3/Vhl/Pnp/P2rx7/Slc39a10/Nfkbid/Kitl/Fcmr/Hif1a/Nod2/Cd274/Bcl2a1a/Serpinb9/Il7r/Nr4a3/Ccr5/Axl/Fcgr2b
C0_cDC2	GO:0007044	cell-substrate junction assembly	36	-1.85091	0.00737883	0.0295153	Wnt4/Peak1/Tns1/Thy1/Itga5/Fn1/Apod/Kdr/Lrp1/Src/Mmp14/Actn1/Sdc4/Dst
C0_cDC2	GO:0010712	regulation of collagen metabolic process	20	-1.85116	0.0101161	0.0373114	Wnt4/Idua/Pdgfb/F2r/Eng/Adora2b/Itgb1/Ccl2/Got1
C0_cDC2	GO:2000379	positive regulation of reactive oxygen species metabolic process	51	-1.85166	0.00425294	0.0195759	Clu/Tlr4/Itgam/Tspo/Tlr2/Pkd2/Tgfbr2/Acod1/Jak2/Ass1/Plau/Icam1/Nqo2/Nfe2l2/Pdgfb/Prkcd/Il1b/Tnf/Cxcl1/Hrh1/Tmem106a/Cdkn1a/Aif1
C0_cDC2	GO:0071887	leukocyte apoptotic process	60	-1.85201	0.00367291	0.0175607	Irs2/Stat5a/Cd74/Jak3/Vhl/Pnp/P2rx7/Slc39a10/Nfkbid/Kitl/Fcmr/Hif1a/Nod2/Cd274/Bcl2a1a/Serpinb9/Il2ra/Il7r/Nr4a3/Ccr5/Axl/Fcgr2b
C0_cDC2	GO:0032602	chemokine production	47	-1.85268	0.00526941	0.0228624	Tlr4/Epha2/Tlr2/Csf1r/Cd74/Il4ra/Egr1/App/Apod/Lrp1/Il1b/Tnf/Tlr3/Adora2b/Cd84/Nod2/Aif1/Il1rl1/Il1a
C0_cDC2	GO:0031646	positive regulation of neurological system process	17	-1.85294	0.0107293	0.0386854	Dbn1/Itgax/Ngfr/Ptafr/Cacnb3/Afdn/Trf
C0_cDC2	GO:0051960	regulation of nervous system development	320	-1.85307	3.81359e-05	0.000543678	Itsn1/Klk8/Cyfip1/S100a9/Il1rap/Lrp4/Cav1/Tspo/Ret/Hspa5/Tlr2/Dpysl2/Gata2/Ulk4/Bmp2/Braf/Ctsc/Scn1b/Ptpn9/Sema6d/Dbn1/Picalm/Thy1/Plxnd1/Pdlim5/Ttc3/Bmpr2/Ptprs/Nf1/Fn1/Igf1r/Rxra/Zfhx3/Myo9a/Apoe/Cdc20/Arsb/Plxna4/Rbpj/Nsmf/Aspm/D16Ertd472e/Dock7/Smurf1/Lpar3/Nfe2l2/Itgax/Camsap2/Calr/Lif/Fyn/App/Ccdc88a/Fgfr1/Kdr/Ngfr/Lrp1/Inppl1/Nectin1/Itm2c/Il1b/Chd7/Tnf/Csf1/Ski/Ccr2/Gata3/Ehd1/Sema4c/Nrep…
C0_cDC2	GO:0050921	positive regulation of chemotaxis	60	-1.85863	0.00344593	0.0169023	Calr/Pdgfb/Wnk1/Fgfr1/Kdr/Il1b/Csf1/Ccr2/Cx3cl1/Prkca/Stx3/C3ar1/Tubb2b/Ccl2/Stk39/Aif1/Ccr1/Cxcl10
C0_cDC2	GO:0016485	protein processing	70	-1.85973	0.00282949	0.0149642	Srgn/Cd55/Pitrm1/Casp7/P2rx7/Ctss/Capn2/Tnp2/Ddi2/Plau/Dhcr24/Cfh/Birc3/Ece1/Asph/Ctla2a/Il1b/Src/Fcmr/Ctnnd1/Mmp14/Furin/Plat/Cdh1
C0_cDC2	GO:1903555	regulation of tumor necrosis factor superfamily cytokine production	87	-1.86015	0.00193086	0.0110557	Mc1r/Tnfaip3/App/Ptafr/Ccr2/Tlr3/Cx3cl1/Ddt/Arid5a/Cd84/Cd209b/Nod2/Cd274/Il12b/Ccl2/Fcgr3/Cd14/Ccr5/Ptger4/Axl
C0_cDC2	GO:0002712	regulation of B cell mediated immunity	23	-1.8605	0.00924352	0.0346404	Tnf/Cd40/Nod2/Cd226/Fcgr3/Fcgr1/Fcgr2b
C0_cDC2	GO:0002889	regulation of immunoglobulin mediated immune response	23	-1.8605	0.00924352	0.0346404	Tnf/Cd40/Nod2/Cd226/Fcgr3/Fcgr1/Fcgr2b
C0_cDC2	GO:0048169	regulation of long-term neuronal synaptic plasticity	10	-1.86102	0.0108635	0.0389551	Nf1/Egr1/Synpo/App/Kdr/Fcgr2b
C0_cDC2	GO:0051251	positive regulation of lymphocyte activation	131	-1.86152	0.00065652	0.00500541	Tlr4/Cav1/Il5/Ppp2r3c/Irs2/Stat5a/Zbtb16/Cd74/Jak3/Cd81/Tgfbr2/Thy1/Nfkbiz/Pnp/Bst1/Il4ra/Cd83/Cd86/Icosl/Slc39a10/Atp11c/Nfkbid/Il1b/Cd80/Malt1/Ccr2/Gata3/Il1rl2/Cd1d1/Egr3/Cd209e/Mmp14/Cd40/Nod2/Tnfsf9/Runx1/Cd274/Il12b/Ccl2/Il2ra/Pdcd1lg2/Il7r/Socs1/Cdkn1a/Aif1/Axl
C0_cDC2	GO:0051899	membrane depolarization	23	-1.86186	0.00911602	0.0344928	Cav1/Tspo/Ppp2r3c/Scn1b/Adora2a/P2rx7/Rangrf/Kdr/Cacnb2/Ngfr/Src/Got1
C0_cDC2	GO:0007159	leukocyte cell-cell adhesion	158	-1.86197	0.000393902	0.00340025	Clec4g/S100a9/Ptpn2/Itgam/Cav1/Stat5a/Lrrc32/Zbtb16/Cd74/Jak3/Cd81/Arg1/Tgfbr2/Adora2a/Thy1/Nfkbiz/Pnp/Ass1/Itga5/Il4ra/Cd83/Cd86/Icam1/Icosl/Prnp/Nfkbid/Wnk1/Hfe/Il1b/Tnf/Cd80/Malt1/Ptafr/Ccr2/Gata3/Ets1/Il1rl2/Cd1d1/Itgb1/Egr3/Slfn1/Cd209e/Tnfsf9/Runx1/Cd274/Il12b/Ccl2/Sdc4/Scgb1a1/Il2ra/Pdcd1lg2/Il7r/Socs1/Aif1/Nr4a3
C0_cDC2	GO:0051223	regulation of protein transport	276	-1.8621	5.75672e-05	0.00073781	Adrb1/Usp50/Tlr4/Rab11fip5/Il1rap/Il5/Ubr5/Ffar4/Tlr2/Mdfic/Srgn/Csf1r/Irs2/Exoc4/Lrrc32/Idua/Cd81/Adora2a/Picalm/P2rx7/Jak2/Il17f/Nf1/Fn1/Il4ra/Apoe/Birc5/Pik3r2/Bag3/Anxa4/Jup/Prnp/Tnfaip3/Prr5l/Fyn/Oxct1/Apod/Prkcd/Xpo1/Casp4/F2r/Asph/Lrp1/Edem1/Il1b/Tnf/Gata3/Src/Cx3cl1/Cacnb3/Arid5a/Hif1a/Cd84/Clec5a/Cd40/Nod2/Rsad2/Cd274/Wls/Ccl2/Cd14/Socs1/Gbp4/Tnfrsf9/Cd200r1/Aif1/Ccr5/Ptger4/Cdh1/Il1rl1/…
C0_cDC2	GO:1904375	regulation of protein localization to cell periphery	46	-1.86278	0.00504471	0.0220755	Adam10/Dlg1/Ppp1r9b/Actb/Pgrmc1/Epha2/Cltc/Ptpn9/Picalm/Rangrf/Pik3r2/Epb41/Prnp/Lrp1/Tnf/Tmbim1/Itgb1/Stx3/Mmp14/Ramp3/Dab2
C0_cDC2	GO:0097242	amyloid-beta clearance	14	-1.86301	0.010735	0.0386854	Clu/Lrp4/Cltc/Picalm/Igf1r/Apoe/Lrp1/Tnf
C0_cDC2	GO:0070663	regulation of leukocyte proliferation	115	-1.86399	0.00108479	0.00716259	H2-Ab1/Btla/Sos2/Cd3e/Tarm1/Znhit1/Vav3/Clec4g/Tlr4/Il5/Ccl12/Hhex/Irs2/Stat5a/Lrrc32/Sh3rf1/Cd74/Jak3/Cd81/Arg1/Tgfbr2/Pnp/Bst1/Cd86/Icosl/Slc39a10/Prnp/Kitl/Il1b/Csf1/Cd80/Ccr2/Cd1d1/Slfn1/Cd209e/Cd40/Tnfsf9/Cd274/Il12b/Sdc4/Scgb1a1/Il2ra/Pdcd1lg2/Cdkn1a/Aif1/Fcgr2b/Cd209a
C0_cDC2	GO:0046328	regulation of JNK cascade	71	-1.86482	0.00264139	0.0140478	Gadd45g/App/Hipk2/Il1b/Tnf/Tlr3/Lmnb1/Nod2/Gadd45b/Rap2a/Il1rn/Trf/Il1a/Fcgr2b/Dab2
C0_cDC2	GO:0060840	artery development	28	-1.86484	0.0078438	0.0307685	Dctn5/Pde2a/Plxnd1/Bmpr2/Nf1/Apoe/Rbpj/Luzp1/Ngfr/Eng/Lrp1/Chd7/Tgfbr1/Ptger4
C0_cDC2	GO:0070661	leukocyte proliferation	143	-1.86529	0.000555038	0.00445285	H2-Ab1/Btla/Sos2/Cd3e/Tarm1/Znhit1/Vav3/Clu/Clec4g/Tlr4/Itgam/Wnt4/Il5/Ccl12/Hhex/Csf1r/Irs2/Stat5a/Lrrc32/Sh3rf1/Cd74/Jak3/Cd81/Arg1/Tgfbr2/Pnp/P2rx7/Bst1/Cd86/Icosl/Slc39a10/Cd79a/Prnp/Fyn/Prkcd/Kitl/Il1b/Csf1/Cd80/Malt1/Ccr2/Cx3cl1/Cd1d1/Slfn1/Cd209e/Cd40/Tnfsf9/Cd274/Il12b/Sdc4/Scgb1a1/Il2ra/Pdcd1lg2/Il7r/Cdkn1a/Aif1/Fcgr2b/Cd209a
C0_cDC2	GO:2000377	regulation of reactive oxygen species metabolic process	86	-1.86569	0.00166904	0.00991648	Clu/Tlr4/Itgam/Cav1/Tspo/Tlr2/Gch1/Pkd2/Tgfbr2/Acod1/Jak2/Ass1/Plau/Icam1/Nqo2/Nfe2l2/Birc3/Fyn/Pdgfb/Prkcd/Ier3/Ngfr/Il1b/Tnf/Cxcl1/Hrh1/Tmem106a/Hif1a/Cflar/Hk2/Cdkn1a/Aif1/Ptger4
C0_cDC2	GO:0043367	CD4-positive, alpha-beta T cell differentiation	48	-1.86849	0.00441005	0.0200073	Braf/Sh3rf1/Jak3/Nfkbiz/Il4ra/Cd83/Gadd45g/Nfkbid/Malt1/Ccr2/Gata3/Sema4a/Rsad2/Runx1/Rora/Il12b/Socs1/Ptger4
C0_cDC2	GO:0050817	coagulation	54	-1.86878	0.00364336	0.0174783	Tlr4/Entpd1/S100a9/Cav1/Anxa8/P2ry1/Apoe/Plau/Plek/Pip5k1c/Enpp4/Nfe2l2/Pdgfb/Prkcd/F2r/Nbeal2/Cx3cl1/Prkca/Pdpn/Procr/Pros1/F2rl2/Axl
C0_cDC2	GO:1903169	regulation of calcium ion transmembrane transport	58	-1.86889	0.00341198	0.0168017	Ank2/Pkd2/Plcg1/Gpr35/Thy1/Pde4b/Ms4a2/Rem1/P2ry6/Prnp/Fyn/Cacnb2/F2r/Asph/Chd7/Atp1b1/Kcne3/Clec4b1/Cx3cl1/Cacnb3/Ramp3/Cxcl10
C0_cDC2	GO:0072604	interleukin-6 secretion	28	-1.86963	0.00752581	0.0298093	F2r/Il1b/Tnf/Tmem106a/Arid5a/Cd84/Cd200r1/Aif1
C0_cDC2	GO:0046890	regulation of lipid biosynthetic process	65	-1.87311	0.00259259	0.0139186	Acadvl/Tspo/Wnt4/Bmp2/Sec14l2/Cd74/Dgat1/Capn2/Igf1r/Pla2g4a/Apoe/Egr1/Atp1a1/Pdgfb/Prkcd/Il1b/Tnf/Adora2b/Hrh1/Vdr/Fabp5/Il1a/Dab2
C0_cDC2	GO:0022617	extracellular matrix disassembly	13	-1.87583	0.00960387	0.0355606	Eng/Ets1/Fscn1/Pdpn/Sh3pxd2b
C0_cDC2	GO:0050818	regulation of coagulation	29	-1.87646	0.00728089	0.0292471	Tlr4/S100a9/Cav1/Apoe/Plau/Plek/Enpp4/Nfe2l2/Pdgfb/Prkcd/F2r/Prkca/Pdpn/Procr/Pros1
C0_cDC2	GO:0021987	cerebral cortex development	29	-1.87681	0.00728089	0.0292471	Ptprs/Nf1/Aspm/Fgfr1/Zbtb18/Bhlhe22/Hif1a/Nrp2/Syne2/Afdn
C0_cDC2	GO:0034754	cellular hormone metabolic process	23	-1.87731	0.00835104	0.0321454	Wnt4/Bmp2/Egr1/Cyp2s1/Ece1/Dhrs3/Comt/Aldh1a2/Dab2
C0_cDC2	GO:0046637	regulation of alpha-beta T cell differentiation	39	-1.87745	0.00558788	0.023686	Sh3rf1/Zbtb16/Jak3/Tgfbr2/Nfkbiz/Pnp/Il4ra/Cd83/Nfkbid/Malt1/Ccr2/Gata3/Cd1d1/Runx1/Socs1
C0_cDC2	GO:0048667	cell morphogenesis involved in neuron differentiation	178	-1.87786	0.000234508	0.00226085	Cyfip1/Lrp4/Epha2/Ret/Dpysl2/Csf1r/Braf/Scn1b/Vasp/Ophn1/B4galt5/Stxbp5/Sema6d/Dbn1/Picalm/Thy1/Plxnd1/Pdlim5/Bmpr2/Ptprs/Enah/Fn1/Igf1r/Plppr4/Apoe/Plxna4/Nsmf/Pip5k1c/Dock7/Lpar3/Apbb2/Fyn/App/Alcam/Ngfr/Lrp1/Nectin1/Gata3/Sema4c/Prkca/Bhlhe22/Itgb1/Skil/B4galt6/Sema4a/Tubb2b/Nrp2/Tnfrsf12a/Rap2a/Olfm1/Afdn/Plxna1/Nr4a3/Flrt3/Ccr5/Dst/Egr2
C0_cDC2	GO:0046854	phosphatidylinositol phosphorylation	16	-1.87798	0.00947948	0.0351918	Pik3r2/Pi4k2b/Socs1/Socs3/Socs2/Cish
C0_cDC2	GO:0051048	negative regulation of secretion	95	-1.87923	0.00113409	0.00737026	Entpd1/Rab11fip5/Ubr5/Ffar4/Srgn/Braf/Lrrc32/Idua/Cd74/P2ry1/Nf1/Fn1/Nucb2/Apoe/Anxa4/Sct/Hrh2/Tnfaip3/Lif/Wnk1/F2r/Il1b/Tnf/Ccr2/Comt/Cx3cl1/Cd84/Rsad2/Tnfrsf9/Htr7/Cd200r1/Stk39/Il1rn/Ptger4
C0_cDC2	GO:0050807	regulation of synapse organization	75	-1.88014	0.00220854	0.0123713	Itsn1/Klk8/Cyfip1/Il1rap/Lrp4/Tlr2/Srgn/Dbn1/Picalm/Il10ra/Vhl/Pdlim5/Ptprs/Apoe/Cdc20/Prnp/Fyn/App/Nectin1/Tnf/Arhgap22/Prkca/Sema4a/Nrp2/Igsf9/Afdn/Flrt3/Fcgr2b
C0_cDC2	GO:0007267	cell-cell signaling	417	-1.88041	1.86741e-05	0.000372134	Adrb1/Mctp1/Itsn1/Zfp703/Cyfip1/S100a9/Prdm15/Rab11fip5/Il1rap/Kdm5b/Lrp4/Cav1/Rab8b/Wnt4/Stab1/Ubr5/Snap23/Ffar4/Tlr2/Mdfic/Atp6v0c/Srgn/Sv2b/Hhex/Bmp2/Grk5/Ank2/Pkd2/Slc12a7/Irs2/Cep89/Braf/Exoc4/Scn1b/Ophn1/Celf4/Hic1/Tmem88/Stxbp5/Dbn1/Plcg1/Daglb/Adora2a/Thy1/P2ry1/Dgat1/Vhl/Stx11/P2rx7/Ctnnbip1/Ptprs/Jak2/Pdlim4/Nf1/Rangrf/Nucb2/Apoe/Birc5/Cdc20/Egr1/Rbpj/Nsmf/Nup155/Aspm/Cyth1/Gnaq/Synpo/D…
C0_cDC2	GO:0031214	biomineral tissue development	44	-1.88043	0.00486521	0.0214553	Wnt10b/Cnnm4/Zmpste24/Tuft1/Wnt4/Srgn/Bmp2/Mgp/Bmpr2/P2rx7/S1pr1/Sbno2/Ltbp3/Rflnb/Slc20a1/Hacd1/Bmp2k/Isg15/Nectin1/Hif1a/Ccr1/Mtss1
C0_cDC2	GO:0042063	gliogenesis	99	-1.88044	0.000969873	0.00660537	Atf5/Clu/Tlr4/S100a9/Itgam/Tspo/Ccl12/Tlr2/Bmp2/Csf1r/Exoc4/B4galt5/Adora2a/P2ry1/Nf1/Fn1/Vcan/Hexb/Lif/App/Pdgfb/Lrp1/Il1b/Tnf/Csf1/Ski/Ccr2/Cx3cl1/B4galt6/Adgrg6/Syne2/Spint1/Ccl2/Afdn/C1qa/Trf/Egr2
C0_cDC2	GO:0001755	neural crest cell migration	13	-1.88187	0.0091333	0.0344928	Acvr1/Ret/Sema6d/Fn1/Kitl/Sema4c/Hif1a/Sema4a/Nrp2
C0_cDC2	GO:0090195	chemokine secretion	13	-1.88203	0.0091333	0.0344928	Csf1r/Il4ra/Lrp1/Tnf/Aif1/Il1rl1
C0_cDC2	GO:1904892	regulation of STAT cascade	51	-1.88271	0.00340235	0.0168017	Jak1/Nlk/Bcl3/Ptpn2/Cav1/Ret/Il5/Csf1r/Sac3d1/Il10ra/Vhl/Jak2/Lif/Fyn/Pigu/Tnf/Cd40/Il12b/Il7r/Socs1/Socs3/Socs2/Gfra2/Ptger4
C0_cDC2	GO:0071495	cellular response to endogenous stimulus	360	-1.88288	1.88761e-05	0.000372134	Zmpste24/Zfp703/Cyfip1/Tlr4/Ptpn2/Cav1/Rab8b/Wnt4/Hspa5/Uso1/Ubr5/Tlr2/Bmp2/Ptpn12/Pkd2/Cpeb4/Irs2/Stat5a/Pde2a/Lrrc32/Dbn1/Plcg1/Tgfbr2/P2ry1/Casp7/Acod1/Bmpr2/Pde4b/Jak2/Pde8a/Npc1/Il17f/Capn2/Igf1r/Soga1/Ltbp3/Nucb2/Egr1/Pik3r2/Icam1/Rbpj/Sesn2/Nsmf/Atp1a1/Zfp366/Col4a2/P2ry6/Smurf1/Jup/Prnp/Calr/Mapk13/Cav2/Fyn/App/Pdgfb/Itgb5/Prkcd/Fgfr1/Kdr/Ngfr/Hipk2/Casp4/Eng/Lrp1/Inppl1/Hsp90b1/Hfe/Il1b/…
C0_cDC2	GO:2000648	positive regulation of stem cell proliferation	14	-1.88353	0.00921669	0.0346404	Epcam/Ltbp3/Aspm/Kitl/Cxcl1/Cx3cl1/Hif1a
C0_cDC2	GO:0042033	chemokine biosynthetic process	11	-1.88369	0.00946177	0.0351918	Cd74/Egr1/App/Il1b/Tnf/Tlr3
C0_cDC2	GO:0045073	regulation of chemokine biosynthetic process	11	-1.88369	0.00946177	0.0351918	Cd74/Egr1/App/Il1b/Tnf/Tlr3
C0_cDC2	GO:0051130	positive regulation of cellular component organization	481	-1.88434	1.85939e-05	0.000372134	Itsn1/Usp50/Cyfip1/Tlr4/S100a9/Il1rap/Lrp4/Cav1/Rab8b/Wnt4/Epha2/Ret/Il5/Hspa5/Gata2/Pih1d1/Spire1/Braf/Scn1b/Plekhm1/Vasp/Dbn1/Picalm/Thy1/Plxnd1/Bmpr2/P2rx7/Pdlim4/Irgm2/Nf1/Capn2/Fn1/Nedd9/Igf1r/Il4ra/Pla2g4a/Apoe/Birc5/Cdc20/Arsb/Plxna4/Icam1/Plek/Palld/Eps8/Synpo/Sept9/D16Ertd472e/Smurf1/Lpar3/Colgalt1/Nfe2l2/Chchd10/Calr/Ralb/Dock1/Lif/Fyn/App/Pdgfb/Ccdc88a/Prkcd/Slx1b/Fgfr1/Kdr/Ngfr/Lrp1/H…
C0_cDC2	GO:0097553	calcium ion transmembrane import into cytosol	43	-1.88465	0.00495018	0.0217624	Ank2/Pkd2/Plcg1/Thy1/P2rx7/Ms4a2/P2ry6/Prnp/Fyn/F2r/Asph/Chd7/Clec4b1/Cx3cl1/Ramp3/Ccr5/Cxcl10
C0_cDC2	GO:0050820	positive regulation of coagulation	11	-1.88585	0.00922683	0.0346404	Tlr4/S100a9/Plek/Enpp4/Nfe2l2/F2r/Pdpn
C0_cDC2	GO:0007596	blood coagulation	53	-1.88804	0.00319065	0.0161236	Tlr4/Entpd1/S100a9/Cav1/Anxa8/P2ry1/Apoe/Plau/Plek/Pip5k1c/Enpp4/Nfe2l2/Pdgfb/Prkcd/F2r/Nbeal2/Cx3cl1/Prkca/Pdpn/Procr/Pros1/F2rl2/Axl
C0_cDC2	GO:0007599	hemostasis	53	-1.88804	0.00319065	0.0161236	Tlr4/Entpd1/S100a9/Cav1/Anxa8/P2ry1/Apoe/Plau/Plek/Pip5k1c/Enpp4/Nfe2l2/Pdgfb/Prkcd/F2r/Nbeal2/Cx3cl1/Prkca/Pdpn/Procr/Pros1/F2rl2/Axl
C0_cDC2	GO:0050776	regulation of immune response	338	-1.8888	1.8938e-05	0.000372134	Clec4g/Tlr4/Ptpn2/Itgam/Sppl2a/Cav1/Tlr2/Skint3/Gata2/Ppp2r3c/Cd55/Stat5a/Braf/Sac3d1/Cd74/Jak3/Plcg1/Cd81/Arg1/Pvr/Thy1/Acod1/Nfkbiz/Pnp/P2rx7/Ptprs/Pde4b/Nectin2/Irgm2/Rftn1/Il4ra/Apoe/Slamf8/Cd86/Ms4a2/Icosl/Plscr1/Cfh/Slc39a10/Cd79a/Prnp/Cfp/Ifi204/Tnfaip3/Nfkbid/Fyn/Wnk1/B430306N03Rik/Phf11a/Cfb/Bcl2a1d/Hfe/Il1b/Tnf/Malt1/Ptafr/Ccr2/Gata3/Itk/Pianp/Ifi211/Tlr3/Zbp1/Adora2b/Irgm1/Adora3/Cd1d1…
C0_cDC2	GO:1903037	regulation of leukocyte cell-cell adhesion	146	-1.88914	0.000416081	0.00355259	Stat5a/Lrrc32/Zbtb16/Cd74/Jak3/Cd81/Arg1/Tgfbr2/Adora2a/Thy1/Nfkbiz/Pnp/Ass1/Il4ra/Cd83/Cd86/Icam1/Icosl/Prnp/Nfkbid/Wnk1/Hfe/Il1b/Tnf/Cd80/Malt1/Ptafr/Ccr2/Gata3/Ets1/Il1rl2/Cd1d1/Egr3/Slfn1/Cd209e/Tnfsf9/Runx1/Cd274/Il12b/Ccl2/Sdc4/Scgb1a1/Il2ra/Pdcd1lg2/Il7r/Socs1/Aif1/Nr4a3
C0_cDC2	GO:1905517	macrophage migration	22	-1.88924	0.00771356	0.0302994	Ccl12/Gpr35/Cd81/Slamf8/Csf1/Ccr2/Cx3cl1/Ddt/Mmp14/C3ar1/Ccl2/Cd200r1
C0_cDC2	GO:0001763	morphogenesis of a branching structure	72	-1.88928	0.00196976	0.0112331	Kdm5b/Wnt4/Epha2/Hhex/Bmp2/Mgp/Maged1/Tgfbr2/Plxnd1/Ctnnbip1/Rxra/Pdgfb/Fgfr1/Kdr/Eng/Flt1/Il1b/Tnf/Csf1/Src/Mmp14/Vdr/Clic4/Spint1/Plxna1/Socs3/Cdh1
C0_cDC2	GO:0031349	positive regulation of defense response	173	-1.89065	0.00021497	0.00212723	Stat5a/Pde2a/Ctsc/Cd74/Cd81/Arg1/Pvr/Acod1/Nfkbiz/Ctss/Ptprs/Jak2/Nectin2/Irgm2/Il17f/Rftn1/Pla2g4a/Cd86/Plscr1/Ifi204/Tnfaip3/Il1b/Tnf/Ccr2/Ets1/Cxcl1/Ifi211/Tlr3/Zbp1/Adora2b/Irgm1/Prkca/Adora3/Ddt/Nod2/Rsad2/Cd226/Il12b/Fcgr3/Cd14/Ifi205/Ccl24/Fcgr1/Ccr5/Ptger4/Tnip3/Il1rl1/Gbp5/Mmp12
C0_cDC2	GO:0072006	nephron development	41	-1.89101	0.00475512	0.0211801	Wnt4/Ret/Bmp2/Maged1/Ctnnbip1/Egr1/Lif/Pdgfb/Myo1e/Gata3/Sec61a1/Sulf2/Ctnnd1/Cflar/C3ar1/Basp1/Mtss1
C0_cDC2	GO:0060548	negative regulation of cell death	373	-1.89104	1.88661e-05	0.000372134	Optn/Psap/Mcfd2/Htt/Myo18a/Bcl3/Bcl2l2/Ptcra/Atf5/Clu/Noc2l/Itsn1/Naip5/Cav1/Wnt4/Hspa5/Ccl12/Ffar4/Gata2/Pih1d1/Grk5/Csf1r/Ybx3/Cpeb4/Irs2/Stat5a/Pde2a/Braf/Hipk3/Sh3rf1/Bcl2a1c/Cd74/Jak3/Adora2a/Bcl2a1b/Slc35f6/Vhl/Pnp/Atox1/Jak2/Pde8a/Npc1/Itga5/Fn1/Epcam/Igf1r/Timp1/Apoe/Birc5/Icam1/Rbpj/Bag3/Dhcr24/Gnaq/Stk40/Ddx3x/Sct/Slc39a10/Nfe2l2/Prnp/Birc3/Tnfaip3/Apbb2/Fyn/Hyou1/Prkcd/Kdr/Ier3/Ngfr/Hi…
C0_cDC2	GO:0097696	STAT cascade	57	-1.89136	0.00304127	0.0156471	Ptpn2/Cav1/Ret/Il5/Csf1r/Pkd2/Stat5a/Sac3d1/Jak3/Il10ra/Vhl/Jak2/Lif/Fyn/Pigu/Tnf/Cd40/Il12b/Il7r/Socs1/Socs3/Socs2/Gfra2/Ptger4
C0_cDC2	GO:0086009	membrane repolarization	10	-1.89144	0.0087079	0.0331952	Dlg1/Zmpste24/Cav1/Scn1b/Atp1a1/Atp1b1/Kcne3/Cacnb3
C0_cDC2	GO:0072359	circulatory system development	371	-1.89229	1.88861e-05	0.000372134	Plcg1/Pofut1/Tgfbr2/Thy1/Mmp19/Vhl/Plxnd1/Casp7/Pdlim5/Bmpr2/Sav1/Pdlim4/S1pr1/Il17f/Itga5/Nf1/Fn1/Rxra/Vcan/Apoe/Slc4a7/Plau/Egr1/Pik3r2/Rbpj/Erap1/Hopx/Luzp1/Gnaq/Col4a2/Nfe2l2/Itgax/Pdlim1/Jup/Pdlim7/Lif/Pdgfb/Adap2/Fgfr1/Pskh1/Ece1/Kdr/Ngfr/Hipk2/Eng/Flt1/Lrp1/Il1b/Chd7/Dhrs3/Myo1e/Ccr2/Gata3/Ets1/Hbegf/Tgfbr1/Tlr3/Arhgap22/Plk2/Cx3cl1/Prkca/Itgb1/Tnfsf12/Egr3/Pdpn/Cysltr1/Alpk2/Adam19/Hif1a/…
C0_cDC2	GO:0071706	tumor necrosis factor superfamily cytokine production	90	-1.8924	0.00109904	0.00720845	Mc1r/Tnfaip3/App/Ptafr/Ccr2/Tlr3/Cx3cl1/Tmem106a/Ddt/Arid5a/Cd84/Cd209b/Nod2/Cd274/Il12b/Ccl2/Fcgr3/Cd14/Ccr5/Ptger4/Axl
C0_cDC2	GO:0050886	endocrine process	27	-1.8935	0.00661536	0.0269937	Atp6ap2/Fam129b/Inhba/Adrb1/Rab11fip5/Rab8b/Lif/Fgfr1/Ece1/F2r/Il1b/Selenom/Gata3/Runx1/Dab2
C0_cDC2	GO:0007622	rhythmic behavior	14	-1.89433	0.008511	0.0326198	Adora2a/Zfhx3/Egr1/Htr7/Ptger4/Egr2
C0_cDC2	GO:0043534	blood vessel endothelial cell migration	48	-1.89485	0.00353636	0.0171606	Epha2/Gata2/Stat5a/Plcg1/Vhl/Nf1/Apoe/Pik3r2/Nfe2l2/Jup/Pdgfb/Fgfr1/Kdr/Ets1/Plk2/Prkca/Itgb1/Egr3/Hif1a/Cd40/Spred1
C0_cDC2	GO:0060429	epithelium development	335	-1.8951	1.89319e-05	0.000372134	Wnt10b/Sgpp1/Psap/Sipa1l3/Htt/Plod3/Poglut1/Kdm6b/Zmpste24/Apold1/Zfp703/Mthfd1/Kdm5b/Lrp4/Cav1/Wnt4/Epha2/Ret/Hhex/Bmp2/Tjp1/Pkd2/Stat5a/Mgp/Pde2a/Maged1/Vasp/Ophn1/Pofut1/Tgfbr2/Vhl/Plxnd1/Bmpr2/Ctnnbip1/Sav1/Ptprs/Jak2/Enah/Nf1/Epcam/Igf1r/Rxra/Myo9a/Vcan/Slc4a7/Icam1/Rbpj/Luzp1/Palld/Anxa4/Itgax/Lfng/Fndc3b/Hrh2/Orai1/Lif/Pdgfb/Fgfr1/Kdr/Ngfr/Eng/Flt1/Maff/Il1b/Chd7/Tnf/Csf1/Ski/Myo1e/Gata3/H…
C0_cDC2	GO:0050680	negative regulation of epithelial cell proliferation	47	-1.89593	0.00381147	0.0181013	Cav1/Ccl12/Maged1/Sav1/Nf1/Apoe/Cav2/Ngfr/Eng/Flt1/Tnf/Gata3/Tgfbr1/Vdr/Klf9/Mtss1/Cdh1/Dab2
C0_cDC2	GO:0045453	bone resorption	33	-1.89632	0.00556528	0.0236254	Csf1r/Plekhm1/Idua/P2rx7/Ctss/S1pr1/Nf1/Ltbp3/Src/Prkca/Gpr55/Dcstamp/Ptger4/Trf
C0_cDC2	GO:0001885	endothelial cell development	33	-1.89737	0.0055442	0.0236065	Tjp1/Pde2a/Ptprs/Icam1/Eng/Il1b/Tnf/Clic4/Tjp2/F11r/Afdn/Cldn1
C0_cDC2	GO:0061384	heart trabecula morphogenesis	10	-1.89831	0.00823836	0.0318759	S1pr1/Rbpj/Eng/Chd7/Tgfbr1/Adgrg6
C0_cDC2	GO:0006811	ion transport	408	-1.89833	1.87213e-05	0.000372134	Cav1/Tspo/Cltc/Ccl12/Snap23/Atp6v0c/Dpysl2/Fxyd2/Ank2/Slc37a2/Pkd2/Slc12a7/Irs2/Scn1b/Kcnk6/Atp13a3/Slc5a3/Jak3/Plcg1/Gpr35/Arg1/Adora2a/Slc7a1/Thy1/P2ry1/Slc39a11/P2rx7/Ctss/Atox1/Pde4b/Nf1/Nipal1/Clcn7/Rangrf/Sco2/Slco3a1/Pla2g4a/Apoe/Slc16a6/Slc4a7/Icam1/Ms4a2/Slc35b2/Gnaq/Slc36a1/Epb41/Atp1a1/Rem1/Slc31a2/P2ry6/Slc7a6/Atp11a/Slc39a10/Lpar3/Atp11c/Chchd10/Slc20a1/Clcn5/Prnp/Slc25a24/Hrh2/Preli…
C0_cDC2	GO:0006909	phagocytosis	86	-1.8995	0.00132302	0.00842295	Pip5k1c/P2ry6/Calr/Dock1/Cd302/Siglece/Rab20/Lrp1/Il1b/Tnf/Ccr2/Itgb1/Cd209b/Nod2/Ccl2/Pros1/Fcgr3/Mfge8/Fcgr1/Aif1/Axl/Fcgr2b
C0_cDC2	GO:0006812	cation transport	285	-1.90014	1.91832e-05	0.000372134	Cnnm4/Tcn2/Adrb1/Zmpste24/Entpd1/Cav1/Tspo/Cltc/Ccl12/Snap23/Fxyd2/Ank2/Pkd2/Slc12a7/Scn1b/Kcnk6/Atp13a3/Slc5a3/Jak3/Plcg1/Gpr35/Arg1/Adora2a/Slc7a1/Thy1/Slc39a11/P2rx7/Ctss/Atox1/Pde4b/Nipal1/Rangrf/Sco2/Slc4a7/Icam1/Ms4a2/Gnaq/Slc36a1/Epb41/Atp1a1/Rem1/Slc31a2/P2ry6/Slc39a10/Lpar3/Chchd10/Slc20a1/Prnp/Orai1/Fyn/Pdgfb/Wnk1/P2rx5/Cacnb2/Alox5/F2r/Asph/Nectin1/Hfe/Chd7/Atp1b1/Cxcl1/Kcne3/Slc41a1/M…
C0_cDC2	GO:0090100	positive regulation of transmembrane receptor protein serine/threonine kinase signaling pathway	33	-1.90102	0.00543879	0.0233326	Bmp2/Nup93/Bmpr2/Rbpj/Kdr/Hipk2/Eng/Hfe/Tgfbr1/Furin/Got1/Dab2
C0_cDC2	GO:0032835	glomerulus development	21	-1.90227	0.00693779	0.0281403	Egr1/Pdgfb/Myo1e/Sulf2/Ctnnd1/Cflar/C3ar1/Basp1/Mtss1
C0_cDC2	GO:0002573	myeloid leukocyte differentiation	106	-1.90337	0.000728067	0.00535676	Cd101/Zfpm1/Tnfrsf11a/Mafb/Ptpn2/Itgam/Epha2/Il5/Tlr2/Gata2/Hhex/Csf1r/Stat5a/Cd74/Cd81/Tgfbr2/Tfe3/Ctnnbip1/Nf1/Sbno2/Rbpj/Lif/App/Kitl/Pilrb1/Tnf/Csf1/Gata3/Src/Prkca/Tnfsf9/C1qc/Runx1/Tjp2/Il12b/Gpr55/Batf2/Dcstamp/Trib1/Ccr1/Trf
C0_cDC2	GO:0002438	acute inflammatory response to antigenic stimulus	12	-1.9037	0.00794413	0.0310335	Icam1/Serpinb9/Fcgr3/Fcgr1/Fcgr2b
C0_cDC2	GO:0001961	positive regulation of cytokine-mediated signaling pathway	17	-1.90619	0.0073164	0.0293069	Cd74/Irgm2/Casp4/Csf1/Zbp1/Irgm1/Axl/Mmp12
C0_cDC2	GO:0032989	cellular component morphogenesis	359	-1.90877	1.88576e-05	0.000372134	Braf/Scn1b/Vasp/Ophn1/B4galt5/Stxbp5/Idua/Sema6d/Dbn1/Adora2a/Picalm/Thy1/P2ry1/Plxnd1/Pdlim5/Ttc3/Bmpr2/P2rx7/Ptprs/Nectin2/Enah/Fn1/Nedd9/Igf1r/Myo9a/Plppr4/Apoe/Plxna4/Icam1/Nsmf/Palld/Eps8/Epb41/Pip5k1c/Dock7/Smurf1/Lpar3/Fgd1/Fndc3b/Gas7/Hrh2/Calr/Hexb/Dock1/Apbb2/Fyn/App/Alcam/Kdr/Ngfr/Lrp1/Nectin1/Ago4/Fmnl2/Gata3/Nbeal2/Wtip/Sema4c/Src/Pacsin2/Parvb/Prkca/Bhlhe22/Csrp1/Itgb1/Skil/Pdpn/B4g…
C0_cDC2	GO:1902042	negative regulation of extrinsic apoptotic signaling pathway via death domain receptors	13	-1.90901	0.00746492	0.0296615	Icam1/Tnfaip3/Tmbim1/Cflar/Pea15a/Dapk1
C0_cDC2	GO:0001774	microglial cell activation	23	-1.90904	0.00658734	0.0269568	Clu/Tlr4/Tlr2/Ctsc/Jak2/Nampt/App/Tnf/Tlr3/Cx3cl1/Aif1/C1qa
C0_cDC2	GO:0002269	leukocyte activation involved in inflammatory response	23	-1.90904	0.00658734	0.0269568	Clu/Tlr4/Tlr2/Ctsc/Jak2/Nampt/App/Tnf/Tlr3/Cx3cl1/Aif1/C1qa
C0_cDC2	GO:0032675	regulation of interleukin-6 production	80	-1.90957	0.00134666	0.00851787	Mapk13/Tnfaip3/App/F2r/Il1b/Tnf/Ptafr/Tlr3/Adora2b/Il1rl2/Arid5a/Cd84/Nod2/Tnfsf9/Cd200r1/Il1rn/Aif1/Ccr5/Il1a
C0_cDC2	GO:0030865	cortical cytoskeleton organization	19	-1.90993	0.00696486	0.0281769	Anln/Dlg1/Nckap1l/Fmnl3/Ppp2r3c/Plek/Epb41/Synpo/Calr/Tnf/Fmnl2/Actn1
C0_cDC2	GO:0002252	immune effector process	303	-1.91105	1.90745e-05	0.000372134	Cd74/Jak3/Cd81/Arg1/Pvr/Stx11/Nfkbiz/Pnp/P2rx7/Nectin2/Ifit3/Rftn1/Map3k14/Sbno2/Il4ra/Slamf8/Cd86/Icam1/Ms4a2/Icosl/Plscr1/Cfh/Ifit1/Itgax/Oasl2/Lfng/Cfp/Tnfaip3/Gadd45g/Nfkbid/App/Prkcd/Ifit2/Isg15/Lrp1/Cfb/Hfe/Il1b/Tnf/Malt1/Ptafr/Ccr2/Gata3/Cxcl1/Tlr3/Zbp1/Adora2b/Adora3/Cd1d1/Arid5a/Gbp2b/Sema4a/Cd84/Cd40/Nod2/Rsad2/C1qc/Cd226/Rora/Il12b/Ccl2/Serpinb9/Klrb1b/Il2ra/Fcgr3/Il7r/Gbp4/Fcgr1/C1qb/…
C0_cDC2	GO:0048245	eosinophil chemotaxis	10	-1.91125	0.00740598	0.0295407	Cx3cl1/Hrh1/Ccl2/Ccl24/Ccl22
C0_cDC2	GO:0007600	sensory perception	113	-1.9125	0.000724594	0.00535676	Olfr373/Pomk/Wnt10b/Hexa/Adra2a/Psap/Spata7/Cnnm4/Adrb1/Tlr4/Tjp1/Fbxo11/P2ry1/P2rx7/Ctss/Olfr920/Slc4a7/Icam1/Pde6a/Mc1r/Hexb/Fyn/Fgfr1/Cacnb2/Ngfr/Alox5/F2r/Chd7/Tnf/Ptafr/Ccr2/Comt/Calca/Cacnb3/Gprc5c/Nav2/Slc52a3/Il12b/Ccl2/Htr7/Il1rn/Fabp5/Cdh1/Il1a
C0_cDC2	GO:0051403	stress-activated MAPK cascade	102	-1.91407	0.000666734	0.00502261	Mapk13/Gadd45g/App/Rell1/Hipk2/Il1b/Tnf/Sema4c/Tlr3/Lmnb1/Nod2/Gadd45b/Rap2a/Il1rn/Trib1/Ptger4/Trf/Il1a/Fcgr2b/Dab2
C0_cDC2	GO:0002709	regulation of T cell mediated immunity	41	-1.91418	0.00395911	0.0184628	Cd81/Arg1/Pvr/Pnp/P2rx7/Nectin2/Hfe/Il1b/Malt1/Ccr2/Gata3/Cd1d1/Arid5a/Nod2/Rsad2/Il12b/Il7r
C0_cDC2	GO:1904062	regulation of cation transmembrane transport	107	-1.91452	0.000606772	0.00474269	Fxyd2/Ank2/Pkd2/Scn1b/Plcg1/Gpr35/Thy1/Ctss/Pde4b/Rangrf/Ms4a2/Rem1/Slc31a2/P2ry6/Chchd10/Prnp/Fyn/Wnk1/Cacnb2/Alox5/F2r/Asph/Chd7/Atp1b1/Kcne3/Clec4b1/Cox17/Cx3cl1/Cacnb3/Ccl2/Ramp3/Cd63/Stk39/Dapk1/Cxcl10
C0_cDC2	GO:0007589	body fluid secretion	27	-1.91503	0.0055552	0.0236179	Adrb1/Cav1/Stat5a/Sct/Wnk1/Adora3/Hif1a/Vdr/Socs2/Stk39/Ptger4
C0_cDC2	GO:0042551	neuron maturation	18	-1.91702	0.00636671	0.0262431	Mtor/Nr4a2/Farp2/Lgi4/Rac3/Ret/B4galt5/Gnaq/App/Pdgfb/B4galt6/C1qa
C0_cDC2	GO:0031175	neuron projection development	334	-1.91753	1.89491e-05	0.000372134	Itsn1/Klk8/Cyfip1/S100a9/Il1rap/Lrp4/Epha2/Ret/Hspa5/Dpysl2/Ulk4/Spire1/Hdgfl3/Csf1r/Braf/Scn1b/Vasp/Ophn1/Ptpn9/B4galt5/Stxbp5/Sema6d/Dbn1/Adora2a/Picalm/Thy1/Plxnd1/Pdlim5/Bmpr2/Ptprs/Jak2/Enah/Nf1/Fn1/Igf1r/Myo9a/Plppr4/Apoe/Cdc20/Arsb/Plxna4/Rbpj/Nsmf/Palld/Pip5k1c/D16Ertd472e/Dock7/Smurf1/Lpar3/Nfe2l2/Gas7/Camsap2/Apbb2/Lif/Fyn/App/Alcam/Ccdc88a/Fgfr1/Kdr/Ngfr/Lrp1/Inppl1/Nectin1/Itm2c/Gata3…
C0_cDC2	GO:0007015	actin filament organization	148	-1.91833	0.000296607	0.00273495	Pdlim4/S1pr1/Enah/Nedd9/Capg/Marcks/Pik3r2/Icam1/Plek/Rflnb/Eps8/Synpo/Gas7/Diaph3/Itgb5/Prkcd/Casp4/Inppl1/Hsp90b1/Pls3/Tgfbr1/Scin/Src/Fscn1/Lima1/Cx3cl1/Hip1/Cgnl1/Rhoc/Arhgap18/Actn1/Sdc4/Ccl24/Aif1/Mtss1/Ptger4/Trf/Sh3pxd2b
C0_cDC2	GO:0034220	ion transmembrane transport	221	-1.91855	7.75329e-05	0.00090989	Fxyd2/Ank2/Slc37a2/Pkd2/Slc12a7/Irs2/Scn1b/Kcnk6/Plcg1/Gpr35/Slc7a1/Thy1/Slc39a11/P2rx7/Ctss/Atox1/Pde4b/Rangrf/Ms4a2/Slc36a1/Atp1a1/Rem1/Slc31a2/P2ry6/Slc7a6/Slc39a10/Chchd10/Slc20a1/Prnp/Orai1/Fyn/Wnk1/Prkcd/P2rx5/Cacnb2/Alox5/F2r/Asph/Hfe/Chd7/Tnf/Ptafr/Atp1b1/Kcne3/Slc41a1/Mcub/Clec4b1/Cox17/Cx3cl1/Prkca/Hrh1/Cacnb3/Slc7a5/Clic4/Ccl2/Ramp3/Cd63/Stk39/Atp6v0a1/Slc30a4/Ccr5/Dapk1/Cxcl10
C0_cDC2	GO:0010466	negative regulation of peptidase activity	61	-1.92299	0.00196139	0.011208	Pih1d1/Sh3rf1/Anxa8/Adora2a/Picalm/Timp1/Birc5/Dhcr24/Ddx3x/Birc3/App/Cstb/Serpina3g/Bcl2a1d/Serpina3f/Src/Fcmr/Cflar/Timp2/Cst3/Spint1/Serpinb9/Serpinb6b
C0_cDC2	GO:0032642	regulation of chemokine production	46	-1.92358	0.0030852	0.0158158	Tlr4/Epha2/Tlr2/Csf1r/Cd74/Il4ra/Egr1/App/Apod/Lrp1/Il1b/Tnf/Tlr3/Adora2b/Cd84/Nod2/Aif1/Il1rl1/Il1a
C0_cDC2	GO:0061041	regulation of wound healing	52	-1.92365	0.00254896	0.0137363	Tlr4/S100a9/Cav1/Wnt4/Apoe/Plau/Plek/Hopx/Enpp4/Nfe2l2/Pdgfb/Prkcd/P2rx5/F2r/Hbegf/Prkca/Pdpn/Tnfrsf12a/Ccl2/Pros1/Cdkn1a/Ptger4
C0_cDC2	GO:0002699	positive regulation of immune effector process	105	-1.92416	0.000505439	0.00411784	Tlr4/Itgam/Il5/Tlr2/Gata2/Stat5a/Cd74/Cd81/Arg1/Pvr/Nfkbiz/Pnp/P2rx7/Nectin2/Il4ra/Ms4a2/Nfkbid/Il1b/Tnf/Malt1/Ptafr/Ccr2/Gata3/Cxcl1/Adora2b/Adora3/Cd1d1/Arid5a/Cd84/Cd40/Nod2/Rsad2/Cd226/Il12b/Ccl2/Fcgr3/Fcgr1/Nr4a3
C0_cDC2	GO:0034765	regulation of ion transmembrane transport	131	-1.9244	0.000338208	0.00303959	Fxyd2/Ank2/Pkd2/Irs2/Scn1b/Plcg1/Gpr35/Thy1/P2rx7/Ctss/Pde4b/Rangrf/Ms4a2/Rem1/Slc31a2/P2ry6/Chchd10/Prnp/Fyn/Wnk1/Cacnb2/Alox5/F2r/Asph/Chd7/Tnf/Ptafr/Atp1b1/Kcne3/Clec4b1/Cox17/Cx3cl1/Prkca/Cacnb3/Clic4/Ccl2/Ramp3/Cd63/Stk39/Dapk1/Cxcl10
C0_cDC2	GO:0051897	positive regulation of protein kinase B signaling	37	-1.92638	0.00408541	0.018866	Stk3/Pik3cg/Itsn1/Phlpp1/Ret/Igf1r/Mc1r/Ngfr/Eng/Tnf/Gata3/Hbegf/Tgfbr1/Src/Cx3cl1/Itgb1/Ramp3/Axl
C0_cDC2	GO:0055070	copper ion homeostasis	11	-1.92891	0.00657839	0.0269568	Sco1/Atox1/Sco2/Slc31a2/Prnp/App/Aplp2
C0_cDC2	GO:0007272	ensheathment of neurons	48	-1.92923	0.0029123	0.0151482	Dlg1/Afg3l2/Cmtm8/Lgi4/Hexa/Psap/Clu/Zscan26/Klk8/Bcas1/Tlr2/Ctsc/B4galt5/Nf1/Rxra/Acer3/Itgax/Hexb/Fyn/Ngfr/Tnf/Ski/B4galt6/Adgrg6/Trf/Egr2
C0_cDC2	GO:0008366	axon ensheathment	48	-1.92923	0.0029123	0.0151482	Dlg1/Afg3l2/Cmtm8/Lgi4/Hexa/Psap/Clu/Zscan26/Klk8/Bcas1/Tlr2/Ctsc/B4galt5/Nf1/Rxra/Acer3/Itgax/Hexb/Fyn/Ngfr/Tnf/Ski/B4galt6/Adgrg6/Trf/Egr2
C0_cDC2	GO:0042552	myelination	48	-1.92923	0.0029123	0.0151482	Dlg1/Afg3l2/Cmtm8/Lgi4/Hexa/Psap/Clu/Zscan26/Klk8/Bcas1/Tlr2/Ctsc/B4galt5/Nf1/Rxra/Acer3/Itgax/Hexb/Fyn/Ngfr/Tnf/Ski/B4galt6/Adgrg6/Trf/Egr2
C0_cDC2	GO:0045766	positive regulation of angiogenesis	72	-1.93066	0.00143628	0.00888679	Plcg1/Tgfbr2/Itga5/Erap1/Nfe2l2/Itgax/Jup/Kdr/Hipk2/Eng/Flt1/Il1b/Ets1/Tlr3/Plk2/Cx3cl1/Prkca/Itgb1/Cysltr1/Hif1a/C3ar1/Cd40/Runx1/Hk2/Ccl24/Il1a
C0_cDC2	GO:0090287	regulation of cellular response to growth factor stimulus	93	-1.93083	0.000607866	0.00474269	Zfp703/Cyfip1/Cav1/Wnt4/Hspa5/Hhex/Bmpr2/Il17f/Rbpj/Smurf1/Cav2/Pdgfb/Fgfr1/Kdr/Ngfr/Hipk2/Eng/Flt1/Ski/Gata3/Nrep/Sulf2/Skil/Hif1a/Htra3/Cflar/Chst11/Furin/Myof/Cd63/Got1/Pmepa1/Dab2
C0_cDC2	GO:0030900	forebrain development	107	-1.93194	0.000465192	0.00387432	Inhba/Rac3/Pfdn1/Htt/Zswim6/Atf5/Kdm6b/Wnt4/Gata2/Ulk4/Hhex/Bmp2/Csf1r/Ophn1/Ptprs/Nf1/Plxna4/Rbpj/Aspm/Gnaq/D16Ertd472e/Dock7/Sct/Fyn/App/Kif1a/Fgfr1/Chd7/Ski/Zbtb18/Src/Bhlhe22/Hif1a/Aplp2/Nrp2/Syne2/Afdn/Aldh1a2/Nr4a3/Axl
C0_cDC2	GO:0090196	regulation of chemokine secretion	12	-1.93216	0.00636385	0.0262431	Csf1r/Il4ra/Lrp1/Tnf/Aif1/Il1rl1
C0_cDC2	GO:0050806	positive regulation of synaptic transmission	50	-1.93254	0.00251324	0.0135954	Braf/Dbn1/Adora2a/Nf1/Apoe/Prnp/Kmo/App/Ngfr/Tnf/Ccr2/Plk2/Cacnb3/Stx3/Ccl2/Afdn/Htr7/Ptger4
C0_cDC2	GO:1901700	response to oxygen-containing compound	477	-1.93269	1.86147e-05	0.000372134	Cxcl2/Gatm/Acod1/P2rx7/Cad/Pde4b/Jak2/Irgm2/Pde8a/Capn2/Igf1r/Soga1/Rxra/Sbno2/Nucb2/Pdia3/Ptgir/Birc5/Cd86/Arsa/Egr1/Pik3r2/Icam1/Sesn2/Nsmf/Eps8/Plscr1/P2ry6/Litaf/Nfe2l2/Jup/Prnp/Mapk13/Cav2/Tnfaip3/Fyn/App/Pdgfb/Oxct1/Apod/Prkcd/Ngfr/Casp4/F2r/Asph/Lrp1/Serpina3g/Inppl1/Edem1/Hsp90b1/Serpina3f/Il1b/Tnf/Hk3/Cd80/Malt1/Ptafr/Cxcl1/Tgfbr1/Src/Ctnna1/Cx3cl1/Prkca/Arid5a/Hif1a/Cd84/Cflar/Nod2/Vdr/…
C0_cDC2	GO:0030902	hindbrain development	41	-1.93296	0.00347731	0.0169746	Sptbn2/Cd3e/Pfdn1/Mafb/Atf5/Hspa5/Gata2/Ophn1/Ptprs/Igf1r/Slc4a7/Zbtb18/Sema4c/Itgb1/Rora/Wls/Aldh1a2/Egr2/Fcgr2b
C0_cDC2	GO:0032743	positive regulation of interleukin-2 production	17	-1.93299	0.00588725	0.0247334	Stat5a/Pde4b/Cd83/Il1b/Malt1/Ccr2/Cd1d1/Runx1/Il1a
C0_cDC2	GO:1903039	positive regulation of leukocyte cell-cell adhesion	109	-1.93358	0.000443835	0.00371826	Stat5a/Zbtb16/Cd74/Jak3/Cd81/Tgfbr2/Thy1/Nfkbiz/Pnp/Il4ra/Cd83/Cd86/Icam1/Icosl/Nfkbid/Il1b/Tnf/Cd80/Malt1/Ptafr/Ccr2/Gata3/Ets1/Il1rl2/Cd1d1/Egr3/Cd209e/Tnfsf9/Runx1/Cd274/Il12b/Ccl2/Il2ra/Pdcd1lg2/Il7r/Socs1/Aif1/Nr4a3
C0_cDC2	GO:0032609	interferon-gamma production	72	-1.93559	0.00135421	0.00854655	Prnp/Gadd45g/Isg15/Il1b/Tnf/Ccr2/Gata3/Itk/Tlr3/Cd1d1/Arid5a/Nod2/Tnfsf9/Runx1/Cd274/Cd226/Il12b/Scgb1a1/Pdcd1lg2/Cd14/Axl/Il1rl1
C0_cDC2	GO:0045860	positive regulation of protein kinase activity	168	-1.93577	0.000156568	0.00165915	Dlg1/Cenpe/Map2k5/Shc1/Map3k20/Iqgap1/Stk3/Pik3cg/Map2k3/Map4k1/Cass4/Adra2a/Rasgrp1/Tnfrsf11a/Map4k5/Clu/Camkk1/Tlr4/Ret/Mdfic/Pih1d1/Bmp2/Ppp2r3c/Csf1r/Pkd2/Maged1/Cd74/Cd81/Tgfbr2/P2rx7/Jak2/Irgm2/Nedd9/Map3k14/Egr1/Ddx3x/Lpar3/Prnp/Ralb/Gadd45g/Pdgfb/Ccdc88a/Prkcd/Fgfr1/F2r/Flt1/Kitl/Il1b/Tnf/Csf1/Malt1/Tgfbr1/Src/Cd40/Nod2/Gadd45b/Il12b/Sdc4/Socs1/Ccnd2/Cdkn1a/Stk39/Il1rn/Fcgr1/Trf/Dab2
C0_cDC2	GO:0061351	neural precursor cell proliferation	58	-1.93582	0.00202651	0.0114647	Gata2/Hhex/Dbn1/Daglb/Nf1/Aspm/Dock7/Kif1a/Fgfr1/Ngfr/Il1b/Ctnna1/Cx3cl1/Hif1a/Rora/Spint1/Afdn/Ccr5/Trf
C0_cDC2	GO:0002886	regulation of myeloid leukocyte mediated immunity	30	-1.93604	0.0045611	0.0205286	Itgam/Gata2/Arg1/Il4ra/Ms4a2/Ptafr/Ccr2/Cxcl1/Adora2b/Adora3/Cd84/Fcgr3/Fcgr1
C0_cDC2	GO:0098662	inorganic cation transmembrane transport	160	-1.93681	0.000177431	0.00185942	Fxyd2/Ank2/Pkd2/Slc12a7/Scn1b/Kcnk6/Plcg1/Gpr35/Thy1/Slc39a11/P2rx7/Atox1/Pde4b/Rangrf/Ms4a2/Slc36a1/Atp1a1/Rem1/Slc31a2/P2ry6/Slc39a10/Chchd10/Prnp/Orai1/Fyn/Wnk1/Cacnb2/Alox5/F2r/Asph/Hfe/Chd7/Atp1b1/Kcne3/Slc41a1/Mcub/Clec4b1/Cox17/Cx3cl1/Hrh1/Cacnb3/Ramp3/Cd63/Stk39/Atp6v0a1/Slc30a4/Ccr5/Cxcl10
C0_cDC2	GO:0050728	negative regulation of inflammatory response	57	-1.9371	0.00219303	0.0123087	Adora2a/Acod1/Apoe/Slamf8/Fndc4/Tnfaip3/Apod/Ier3/Siglece/Ctla2a/Gata3/Ets1/Cx3cl1/Nod2/Rora/Il12b/Il2ra/Socs3/Cd200r1/Ptger4/Fcgr2b
C0_cDC2	GO:0030511	positive regulation of transforming growth factor beta receptor signaling pathway	13	-1.93784	0.00613877	0.0255632	Hipk2/Furin/Got1/Dab2
C0_cDC2	GO:1903846	positive regulation of cellular response to transforming growth factor beta stimulus	13	-1.93784	0.00613877	0.0255632	Hipk2/Furin/Got1/Dab2
C0_cDC2	GO:0051931	regulation of sensory perception	18	-1.93868	0.00534463	0.023033	Ctss/Fgfr1/F2r/Ptafr/Comt/Cacnb3/Fabp5/Il1a
C0_cDC2	GO:0042108	positive regulation of cytokine biosynthetic process	39	-1.94101	0.00336113	0.0166881	Cd3e/Cybb/Zfpm1/Bcl3/Tlr4/Tlr2/Stat5a/Cd74/Jak2/Egr1/Icosl/App/Il1b/Tnf/Ptafr/Ccr2/Tlr3/Cd1d1/Cd209b/Fcgr3/Il1a
C0_cDC2	GO:1903076	regulation of protein localization to plasma membrane	39	-1.94292	0.00334013	0.0166275	Dlg1/Ppp1r9b/Actb/Pgrmc1/Epha2/Cltc/Ptpn9/Picalm/Rangrf/Pik3r2/Prnp/Lrp1/Tnf/Tmbim1/Itgb1/Stx3/Mmp14/Ramp3/Dab2
C0_cDC2	GO:0032231	regulation of actin filament bundle assembly	39	-1.94307	0.00331912	0.0165956	Wnt4/Braf/Dbn1/Pdlim4/S1pr1/Pik3r2/Plek/Synpo/Tgfbr1/Cx3cl1/Rhoc/Sdc4/Mtss1/Ptger4/Sh3pxd2b
C0_cDC2	GO:0001775	cell activation	427	-1.94329	1.86553e-05	0.000372134	Clec4g/Tlr4/Entpd1/Ptpn2/Itgam/Cav1/Il11ra1/Wnt4/Il5/Adgrg3/Snap23/Tlr2/Gata2/Hhex/Ppp2r3c/Irs2/Stat5a/Braf/Ctsc/Lrrc32/Sh3rf1/Zbtb16/Clptm1/Cd74/Jak3/Cd81/Arg1/Tgfbr2/Adora2a/Thy1/P2ry1/Dgat1/Stx11/Nfkbiz/Pnp/P2rx7/Jak2/Nectin2/Fn1/Bst1/Timp1/Sbno2/Il4ra/Cd83/Apoe/Slamf8/Cd86/Egr1/Icam1/Nampt/Ms4a2/Rbpj/Plek/Pip5k1c/Icosl/Plscr1/Slc39a10/Atp11c/Lfng/Cd79a/Prnp/Tnfaip3/Gadd45g/Nfkbid/Fyn/App/Pdgf…
C0_cDC2	GO:0031401	positive regulation of protein modification process	450	-1.94383	1.8647e-05	0.000372134	Fam129a/Tlr4/Lrp4/Cav1/Ret/Il5/Hspa5/Ccl12/Ffar4/Tlr2/Mdfic/Pih1d1/Bmp2/Ppp2r3c/Mid1/Csf1r/Pkd2/Braf/Huwe1/Maged1/Sh3rf1/Cd74/Cd81/Tgfbr2/P2ry1/Bmpr2/P2rx7/Jak2/Irgm2/Pde8a/Itga5/Nedd9/Map3k14/Igf1r/Apoe/Cdc20/Scimp/Egr1/Icam1/Nsmf/Ddx3x/Dock7/Nqo2/P2ry6/Slc39a10/Lpar3/Prnp/Ralb/Birc3/Cav2/Prr5l/Lif/Gadd45g/Fyn/App/Pdgfb/Ccdc88a/Prkcd/Fgfr1/Kdr/Rell1/Ngfr/Hipk2/F2r/Eng/Flt1/Lrp1/Kitl/Rnf180/Hfe/I…
C0_cDC2	GO:0033081	regulation of T cell differentiation in thymus	12	-1.9455	0.00582997	0.0246589	Sos2/Rasgrp1/Ptpn2/Clptm1/Nfkbid/Il1b/Cd1d1/Egr3/Il7r
C0_cDC2	GO:0002478	antigen processing and presentation of exogenous peptide antigen	18	-1.94624	0.00508911	0.0221673	H2-DMa/H2-Aa/H2-Eb1/Ifi30/H2-DMb2/H2-Ab1/H2-DMb1/Tap1/Mfsd6/Tapbp/Cd74/Fcgr3/Fcgr1/Fcgr2b
C0_cDC2	GO:0006898	receptor-mediated endocytosis	84	-1.94654	0.000917993	0.00638426	Ophn1/Cd81/Tgfbr2/Picalm/Apoe/Pip5k1c/Fcho2/Canx/Cav2/Lrp1/Hfe/Prkca/Itgb1/Hip1/Ramp3/Cd14/Cd63/Cxcl16/Fcgr1/Trf/Fcgr2b/Mrc1/Dab2
C0_cDC2	GO:0032649	regulation of interferon-gamma production	64	-1.94857	0.00140342	0.00873184	Isg15/Il1b/Tnf/Ccr2/Gata3/Tlr3/Cd1d1/Arid5a/Nod2/Tnfsf9/Runx1/Cd274/Cd226/Il12b/Scgb1a1/Pdcd1lg2/Cd14/Axl/Il1rl1
C0_cDC2	GO:0090087	regulation of peptide transport	291	-1.94968	1.91303e-05	0.000372134	Adrb1/Itsn1/Usp50/Tlr4/S100a9/Rab11fip5/Il1rap/Rab8b/Il5/Ubr5/Ffar4/Tlr2/Mdfic/Srgn/Csf1r/Irs2/Exoc4/Lrrc32/Idua/Cd74/Cd81/Adora2a/Picalm/P2rx7/Jak2/Il17f/Nf1/Fn1/Il4ra/Nucb2/Apoe/Birc5/Pik3r2/Bag3/Anxa4/Sct/Jup/Prnp/Tnfaip3/Prr5l/Lif/Fyn/Oxct1/Apod/Prkcd/Xpo1/Casp4/F2r/Asph/Lrp1/Edem1/Hfe/Il1b/Chd7/Tnf/Gata3/Src/Cx3cl1/Cacnb3/Arid5a/Hif1a/Cd84/Clec5a/Cd40/Nod2/Rsad2/Cd274/Wls/Ccl2/Cd14/Socs1/Gbp…
C0_cDC2	GO:0048008	platelet-derived growth factor receptor signaling pathway	28	-1.95036	0.00434589	0.019843	Jak2/Ptgir/Pdgfb/Apod/Lrp1/Inppl1/Myo1e/Src/Csrnp1/Hip1/Plat/Nr4a3
C0_cDC2	GO:0002920	regulation of humoral immune response	13	-1.95106	0.00553987	0.0236065	Ppp2r3c/Cd55/Acod1/Cfh/Il1b/Tnf/Nod2/Fcgr2b
C0_cDC2	GO:0098660	inorganic ion transmembrane transport	170	-1.95332	0.000136959	0.00146779	Fxyd2/Ank2/Slc37a2/Pkd2/Slc12a7/Scn1b/Kcnk6/Plcg1/Gpr35/Thy1/Slc39a11/P2rx7/Atox1/Pde4b/Rangrf/Ms4a2/Slc36a1/Atp1a1/Rem1/Slc31a2/P2ry6/Slc39a10/Chchd10/Slc20a1/Prnp/Orai1/Fyn/Wnk1/Cacnb2/Alox5/F2r/Asph/Hfe/Chd7/Ptafr/Atp1b1/Kcne3/Slc41a1/Mcub/Clec4b1/Cox17/Cx3cl1/Hrh1/Cacnb3/Ramp3/Cd63/Stk39/Atp6v0a1/Slc30a4/Ccr5/Cxcl10
C0_cDC2	GO:0097755	positive regulation of blood vessel diameter	25	-1.95572	0.00454478	0.0205201	Adra2a/Plod3/Adrb1/Gch1/Adora2a/Bmpr2/Apoe/Dock4/Kdr/Tnf/Ptafr/Adora2b/Cx3cl1/Calca/Hif1a
C0_cDC2	GO:0010324	membrane invagination	30	-1.95598	0.00388538	0.0182844	Gata2/Spire1/Snx18/Fcho2/Smurf1/Siglece/Fcgr3/Mfge8/Fcgr1/Aif1/Fcgr2b
C0_cDC2	GO:0021543	pallium development	36	-1.95656	0.00347859	0.0169746	Ptprs/Nf1/Aspm/Sct/Fgfr1/Zbtb18/Bhlhe22/Hif1a/Nrp2/Syne2/Afdn/Nr4a3
C0_cDC2	GO:0032651	regulation of interleukin-1 beta production	36	-1.95828	0.00345751	0.0169299	Naip5/Usp50/Tlr4/Tlr2/P2rx7/Jak2/Egr1/Ifi204/Tnfaip3/App/Casp4/F2r/Malt1/Ifi211/Nod2/Ifi205/Ccr5
C0_cDC2	GO:0050764	regulation of phagocytosis	46	-1.95869	0.00248067	0.0134705	Calr/Siglece/Lrp1/Il1b/Tnf/Cd209b/Nod2/Ccl2/Pros1/Fcgr3/Mfge8/Fcgr1/Fcgr2b
C0_cDC2	GO:0010524	positive regulation of calcium ion transport into cytosol	23	-1.95882	0.00461113	0.0206556	Htt/Adrb1/Cav1/Pkd2/Plcg1/Thy1/P2rx7/P2ry6/F2r/Asph/Clec4b1/Cx3cl1/Ramp3/Cxcl10
C0_cDC2	GO:0045216	cell-cell junction organization	44	-1.96092	0.00244305	0.0132917	Jup/F2r/Nectin1/Tnf/Tgfbr1/Fscn1/Ctnna1/Prkca/Itgb1/Ctnnd1/Rhoc/Afdn/Cdh1/Cldn1
C0_cDC2	GO:0050920	regulation of chemotaxis	81	-1.96149	0.000776413	0.0056164	Cd74/Sema6d/Bmpr2/S1pr1/Fn1/Bst1/Slamf8/Plxna4/Calr/Pdgfb/Wnk1/Fgfr1/Kdr/Il1b/Csf1/Ccr2/Sema4c/Cx3cl1/Prkca/Ddt/Stx3/Sema4a/C3ar1/Nod2/Tubb2b/Ccl2/Stk39/Aif1/Ccr1/Cxcl10
C0_cDC2	GO:0048666	neuron development	366	-1.96266	1.89018e-05	0.000372134	Klk8/Cyfip1/S100a9/Il1rap/Lrp4/Epha2/Ret/Hspa5/Dpysl2/Gata2/Ulk4/Spire1/Hdgfl3/Csf1r/Braf/Scn1b/Vasp/Ophn1/Ptpn9/B4galt5/Stxbp5/Sema6d/Dbn1/Adora2a/Picalm/Thy1/Plxnd1/Pdlim5/Bmpr2/Ptprs/Jak2/Enah/Nf1/Fn1/Igf1r/Pbx3/Myo9a/Plppr4/Apoe/Cdc20/Slc4a7/Arsb/Plxna4/Rbpj/Nsmf/Palld/Gnaq/Pip5k1c/D16Ertd472e/Dock7/Smurf1/Lpar3/Nfe2l2/Gas7/Camsap2/Apbb2/Lif/Fyn/App/Pdgfb/Alcam/Ccdc88a/Fgfr1/Kdr/Ngfr/Lrp1/Inp…
C0_cDC2	GO:0071230	cellular response to amino acid stimulus	21	-1.9627	0.00459682	0.020624	Atp5g1/Rragd/Sh3bp4/Col4a1/Mtor/Rptor/Sesn3/Klhl22/Cpeb4/Capn2/Sesn2/Nsmf/Fyn/Tnf/Socs1/Cdh1
C0_cDC2	GO:0017015	regulation of transforming growth factor beta receptor signaling pathway	47	-1.96302	0.00239518	0.0131202	Zfyve9/Zfp451/Zfp703/Cav1/Hspa5/Il17f/Smurf1/Cav2/Hipk2/Eng/Ski/Nrep/Skil/Htra3/Chst11/Furin/Got1/Pmepa1/Dab2
C0_cDC2	GO:0031348	negative regulation of defense response	87	-1.96346	0.000691043	0.00519193	Arg1/Adora2a/Acod1/Apoe/Slamf8/Fndc4/Tnfaip3/Apod/Ier3/Siglece/Ctla2a/Gata3/Ets1/Cx3cl1/Nod2/Rora/Il12b/Serpinb9/Klrb1b/Il2ra/Socs3/Cd200r1/Ccr1/Ptger4/Fcgr2b/Mmp12
C0_cDC2	GO:0002694	regulation of leukocyte activation	245	-1.96508	1.92805e-05	0.000372134	Clec4g/Tlr4/Ptpn2/Itgam/Cav1/Il5/Gata2/Ppp2r3c/Irs2/Stat5a/Braf/Ctsc/Lrrc32/Sh3rf1/Zbtb16/Clptm1/Cd74/Jak3/Cd81/Arg1/Tgfbr2/Adora2a/Thy1/Nfkbiz/Pnp/Nectin2/Bst1/Il4ra/Cd83/Slamf8/Cd86/Ms4a2/Icosl/Plscr1/Slc39a10/Atp11c/Prnp/Tnfaip3/Nfkbid/Ctla2a/Hfe/Il1b/Cd80/Malt1/Ptafr/Havcr1/Ccr2/Gata3/Adora2b/Il1rl2/Cx3cl1/Adora3/Cd1d1/Egr3/Slfn1/Cd209e/Cd84/Mmp14/Cd40/Nod2/Tnfsf9/Runx1/Cd274/Cd226/Rora/Il12b…
C0_cDC2	GO:0090183	regulation of kidney development	17	-1.96509	0.00452209	0.0204768	Mmp9/Prkx/Wnt4/Ret/Maged1/Egr1/Lif/Pdgfb/Gata3/Cflar/C3ar1
C0_cDC2	GO:0009306	protein secretion	225	-1.96525	5.81215e-05	0.00073781	Adra2a/Optn/Rasgrp1/Htt/Nnat/Myo18a/Adrb1/Usp50/Tlr4/Rab11fip5/Il1rap/Rab8b/Il5/Ubr5/Ffar4/Tlr2/Srgn/Csf1r/Irs2/Lrrc32/Idua/Plcg1/Adora2a/Dgat1/P2rx7/Jak2/Il17f/Fn1/Il4ra/Apoe/Birc5/Ms4a2/Rbpj/Plek/Anxa4/Tnfaip3/Oxct1/Casp4/F2r/Isg15/Lrp1/Il1b/Tnf/Gata3/Src/Cx3cl1/Tmem106a/Arid5a/Hif1a/Cd84/Clec5a/Cd40/Nod2/Rsad2/Cd274/Wls/Cd14/Socs1/Tnfrsf9/Cd200r1/Il1rn/Aif1/Ccr5/Ptger4/Il1rl1/Clec4n/Il1a/Gbp5/…
C0_cDC2	GO:0032635	interleukin-6 production	82	-1.96586	0.000714811	0.0053143	Mapk13/Tnfaip3/App/F2r/Il1b/Tnf/Ptafr/Tlr3/Adora2b/Il1rl2/Tmem106a/Arid5a/Cd84/Nod2/Tnfsf9/Cd200r1/Il1rn/Aif1/Ccr5/Il1a
C0_cDC2	GO:0010959	regulation of metal ion transport	136	-1.96749	0.000218141	0.00215112	Cav1/Tspo/Ccl12/Fxyd2/Ank2/Pkd2/Scn1b/Jak3/Plcg1/Gpr35/Adora2a/Thy1/P2rx7/Pde4b/Rangrf/Icam1/Ms4a2/Gnaq/Epb41/Atp1a1/Rem1/Slc31a2/P2ry6/Lpar3/Prnp/Orai1/Fyn/Pdgfb/Wnk1/Cacnb2/F2r/Asph/Hfe/Chd7/Atp1b1/Cxcl1/Kcne3/Clec4b1/Cx3cl1/Cacnb3/Mllt6/Cd84/Vdr/Ramp3/Cd63/Stk39/Ccr1/Trf/Cxcl10
C0_cDC2	GO:0010522	regulation of calcium ion transport into cytosol	37	-1.96934	0.00275871	0.014617	Htt/Adrb1/Cav1/Ank2/Pkd2/Plcg1/Thy1/P2rx7/Ms4a2/P2ry6/Prnp/Fyn/F2r/Asph/Chd7/Clec4b1/Cx3cl1/Ramp3/Cxcl10
C0_cDC2	GO:0050679	positive regulation of epithelial cell proliferation	72	-1.96972	0.00102591	0.00692429	Zfp703/Kdm5b/Cav1/Gata2/Bmp2/Stat5a/Plcg1/Arg1/Vhl/Bmpr2/Nf1/Cav2/Tnfaip3/Pdgfb/Fgfr1/Kdr/Jaml/Adora2b/Prkca/Egr3/Cflar/Nod2/Cyp7b1/Ccl2/Ccnd2/Ccl24/Nr4a3/Mmp12
C0_cDC2	GO:0046426	negative regulation of JAK-STAT cascade	13	-1.97454	0.00483402	0.0213841	Bcl3/Ptpn2/Cav1/Sac3d1/Vhl/Socs1/Socs3/Socs2
C0_cDC2	GO:1904893	negative regulation of STAT cascade	13	-1.97454	0.00483402	0.0213841	Bcl3/Ptpn2/Cav1/Sac3d1/Vhl/Socs1/Socs3/Socs2
C0_cDC2	GO:0046850	regulation of bone remodeling	25	-1.9746	0.00395013	0.0184628	Csf1r/Plekhm1/Idua/P2rx7/S1pr1/Nf1/Ltbp3/Prkca/Dcstamp/Ptger4/Trf
C0_cDC2	GO:0014911	positive regulation of smooth muscle cell migration	23	-1.97469	0.0039099	0.0183236	Sema6d/Plau/Egr1/Dock7/P2ry6/Dock4/Pdgfb/Lrp1/Src/Aif1/Nr4a3/Ptger4
C0_cDC2	GO:0090197	positive regulation of chemokine secretion	11	-1.9764	0.00452798	0.0204768	Csf1r/Il4ra/Lrp1/Tnf/Aif1/Il1rl1
C0_cDC2	GO:0001935	endothelial cell proliferation	59	-1.97806	0.00144378	0.00891374	Cav1/Epha2/Ccl12/Gata2/Bmp2/Stat5a/Plcg1/Arg1/Bmpr2/Nf1/Apoe/Cav2/Pdgfb/Fgfr1/Kdr/Ngfr/Eng/Flt1/Tnf/Tgfbr1/Adora2b/Prkca/Egr3/Ccl2/Aldh1a2/Ccl24
C0_cDC2	GO:2000243	positive regulation of reproductive process	27	-1.97929	0.00341369	0.0168017	P2ry1/Igf1r/Plau/Lfng/Ptafr/Src/Runx1/Plat/Cdc25c/Ptger4
C0_cDC2	GO:0043069	negative regulation of programmed cell death	335	-1.97972	1.89319e-05	0.000372134	Htt/Myo18a/Bcl3/Bcl2l2/Ptcra/Atf5/Clu/Noc2l/Itsn1/Naip5/Cav1/Wnt4/Hspa5/Ccl12/Ffar4/Gata2/Pih1d1/Grk5/Csf1r/Ybx3/Cpeb4/Irs2/Stat5a/Braf/Hipk3/Sh3rf1/Bcl2a1c/Cd74/Jak3/Adora2a/Bcl2a1b/Slc35f6/Vhl/Pnp/Atox1/Jak2/Itga5/Fn1/Epcam/Igf1r/Timp1/Apoe/Birc5/Icam1/Rbpj/Bag3/Dhcr24/Gnaq/Stk40/Ddx3x/Sct/Slc39a10/Nfe2l2/Prnp/Birc3/Tnfaip3/Apbb2/Fyn/Hyou1/Prkcd/Kdr/Ier3/Ngfr/Hipk2/F2r/Insl6/Lrp1/Kitl/Ago4/Bcl2…
C0_cDC2	GO:0097306	cellular response to alcohol	22	-1.97991	0.00388865	0.0182844	P2ry6/Jup/Ctnna1/Klf9/Adam15/Ptger4/Cdh1
C0_cDC2	GO:0051955	regulation of amino acid transport	14	-1.98043	0.00436242	0.0198865	Dpysl2/Arg1/Adora2a/P2rx7/Kmo/Il1b/Tnf/Stk39/Il1rn
C0_cDC2	GO:1903317	regulation of protein maturation	22	-1.9812	0.00388865	0.0182844	Cd55/Tnp2/Cfh/Birc3/Ctla2a/Il1b/Src/Fcmr/Ctnnd1/Mmp14/Cdh1
C0_cDC2	GO:0000902	cell morphogenesis	334	-1.98185	1.89491e-05	0.000372134	Braf/Scn1b/Vasp/Ophn1/B4galt5/Stxbp5/Idua/Sema6d/Dbn1/Adora2a/Picalm/Thy1/P2ry1/Plxnd1/Pdlim5/Ttc3/Bmpr2/P2rx7/Ptprs/Enah/Fn1/Nedd9/Igf1r/Myo9a/Plppr4/Apoe/Plxna4/Icam1/Nsmf/Palld/Eps8/Epb41/Pip5k1c/Dock7/Smurf1/Lpar3/Fgd1/Fndc3b/Gas7/Hrh2/Calr/Hexb/Dock1/Apbb2/Fyn/App/Alcam/Kdr/Ngfr/Lrp1/Nectin1/Ago4/Fmnl2/Gata3/Nbeal2/Wtip/Sema4c/Src/Pacsin2/Parvb/Prkca/Bhlhe22/Itgb1/Skil/Pdpn/B4galt6/Rhoc/Sema…
C0_cDC2	GO:0045582	positive regulation of T cell differentiation	54	-1.98311	0.00153187	0.00931586	Stat5a/Zbtb16/Cd74/Tgfbr2/Nfkbiz/Pnp/Il4ra/Cd83/Nfkbid/Il1b/Malt1/Ccr2/Gata3/Il1rl2/Cd1d1/Egr3/Tnfsf9/Runx1/Il2ra/Il7r/Socs1
C0_cDC2	GO:0120192	tight junction assembly	13	-1.98374	0.00457734	0.0205691	Tnf/Itgb1/Afdn/Cdh1/Cldn1
C0_cDC2	GO:0045661	regulation of myoblast differentiation	20	-1.98377	0.00395663	0.0184628	Tnf/Cxcl10/Cxcl9/Ccl17
C0_cDC2	GO:0045576	mast cell activation	31	-1.98629	0.00308407	0.0158158	Rasgrp1/Tlr4/Snap23/Gata2/Nectin2/Il4ra/Ms4a2/Plscr1/Havcr1/Adora2b/Adora3/Cd84/Cd226/Fcgr3/Nr4a3
C0_cDC2	GO:0098655	cation transmembrane transport	177	-1.98652	5.86281e-05	0.00073781	Fxyd2/Ank2/Pkd2/Slc12a7/Scn1b/Kcnk6/Plcg1/Gpr35/Slc7a1/Thy1/Slc39a11/P2rx7/Ctss/Atox1/Pde4b/Rangrf/Ms4a2/Slc36a1/Atp1a1/Rem1/Slc31a2/P2ry6/Slc39a10/Chchd10/Prnp/Orai1/Fyn/Wnk1/Cacnb2/Alox5/F2r/Asph/Hfe/Chd7/Atp1b1/Kcne3/Slc41a1/Mcub/Clec4b1/Cox17/Cx3cl1/Hrh1/Cacnb3/Slc7a5/Ccl2/Ramp3/Cd63/Stk39/Atp6v0a1/Slc30a4/Ccr5/Dapk1/Cxcl10
C0_cDC2	GO:0002456	T cell mediated immunity	53	-1.98811	0.0014503	0.00893458	Ctsc/Cd81/Arg1/Pvr/Stx11/Pnp/P2rx7/Nectin2/Rftn1/Icam1/Hfe/Il1b/Malt1/Ccr2/Gata3/Cd1d1/Arid5a/Nod2/Rsad2/Il12b/Serpinb9/Il7r
C0_cDC2	GO:0043122	regulation of I-kappaB kinase/NF-kappaB signaling	68	-1.9882	0.000800641	0.0057308	Tnfaip3/Nfkbid/Fyn/Il1b/Tnf/Tlr3/Cx3cl1/Tmem106a/Nod2/Rora/Il1rn/Tnip3/Il1rl1/Clec4n/Il1a
C0_cDC2	GO:0061844	antimicrobial humoral immune response mediated by antimicrobial peptide	16	-1.98861	0.00405654	0.0187631	Cxcl1/Nod2/Ccl2/Cxcl10/Cxcl9
C0_cDC2	GO:0046626	regulation of insulin receptor signaling pathway	29	-1.98908	0.0032383	0.0162775	Prkcd/Inppl1/Il1b/Src/Prkca/Socs1/Socs3/Socs2/Cish
C0_cDC2	GO:0030029	actin filament-based process	271	-1.98967	1.91986e-05	0.000372134	Adrb1/Cdc42bpg/Cyfip1/S100a9/Cdc42bpb/Cav1/Wnt4/Cnn3/Ablim3/Tlr2/Spire1/Csf1r/Ank2/Braf/Scn1b/Vasp/Ophn1/Dbn1/Pdlim5/Pde4b/Pdlim4/S1pr1/Enah/Nf1/Nedd9/Bst1/Capg/Marcks/Pik3r2/Icam1/Plek/Rflnb/Nup155/Palld/Eps8/Epb41/Atp1a1/Synpo/Fgd1/Pdlim1/Jup/Gas7/Pdlim7/Calr/Apbb2/Diaph3/Pdgfb/Itgb5/Ccdc88a/Prkcd/Cacnb2/Casp4/Lrp1/Inppl1/Hsp90b1/Tnf/Pls3/Fmnl2/Kcne3/Tgfbr1/Scin/Src/Pacsin2/Parvb/Fscn1/Lima1/Cx…
C0_cDC2	GO:0034103	regulation of tissue remodeling	32	-1.98996	0.00295334	0.0152777	Pml/Ppargc1b/Itgav/Suco/Car2/B4galt1/Tnfrsf11a/Csf1r/Plekhm1/Idua/P2rx7/S1pr1/Nf1/Ltbp3/Tmbim1/Prkca/Vdr/Dcstamp/Ptger4/Trf
C0_cDC2	GO:0071902	positive regulation of protein serine/threonine kinase activity	104	-1.99175	0.000323161	0.00292285	Shc1/Map3k20/Iqgap1/Pik3cg/Map2k3/Map4k1/Adra2a/Rasgrp1/Tnfrsf11a/Tlr4/Ret/Mdfic/Pih1d1/Bmp2/Csf1r/Pkd2/Maged1/Cd74/Cd81/P2rx7/Jak2/Irgm2/Ddx3x/Lpar3/Ralb/Gadd45g/Pdgfb/Prkcd/Fgfr1/F2r/Flt1/Kitl/Il1b/Tnf/Tgfbr1/Src/Cd40/Nod2/Gadd45b/Ccnd2/Stk39/Il1rn/Trf/Dab2
C0_cDC2	GO:0051770	positive regulation of nitric-oxide synthase biosynthetic process	11	-1.99244	0.00388723	0.0182844	Tlr4/Tlr2/Jak3/Jak2/Nampt/Kdr/Nod2/Ccl2
C0_cDC2	GO:0007588	excretion	13	-1.99301	0.00434206	0.019843	Comt/Mllt6/Htr7/Ptger4/Dab2
C0_cDC2	GO:0042698	ovulation cycle	17	-1.99329	0.00354088	0.0171606	Sgpl1/Inhba/Stat5a/Igf1r/Pla2g4a/Egr1/Src/Runx1/Ptger4/Axl
C0_cDC2	GO:0034446	substrate adhesion-dependent cell spreading	32	-1.99436	0.00284786	0.0150333	Cass4/Rac3/Micall2/Peak1/Braf/Dbn1/Fn1/Nedd9/Fndc3b/Calr/Dock1/Src/Parvb/Pdpn/Axl/Dab2
C0_cDC2	GO:0019724	B cell mediated immunity	46	-1.99689	0.0018136	0.0106157	Cd55/Cd74/Cd81/Nectin2/Il4ra/Icosl/Prkcd/Tnf/Cd40/Nod2/C1qc/Cd226/Fcgr3/Fcgr1/C1qb/C1qa/Fcgr2b
C0_cDC2	GO:0019932	second-messenger-mediated signaling	122	-1.99702	0.000219754	0.00215952	Adrb1/Zmpste24/Rcan1/Adgrg3/Rcan3/Grk5/Ank2/Pkd2/Pde2a/Exoc4/Plcg1/Adora2a/Pde4b/Irgm2/Npr1/Bst1/Nucb2/Ptgir/Apoe/Gnaq/Sct/P2ry6/Mc1r/Prnp/Ece1/Kdr/Cxcr6/Asph/Tnf/Atp1b1/Ccr2/Adora2b/Calca/Adora3/Ccrl2/Adgrg6/Ramp3/Htr7/Mt1/Ccr1/Ccr5/Ptger4/Mt2/Cxcl10
C0_cDC2	GO:0061138	morphogenesis of a branching epithelium	66	-1.99735	0.000801101	0.0057308	Kdm5b/Wnt4/Epha2/Hhex/Bmp2/Mgp/Maged1/Tgfbr2/Plxnd1/Ctnnbip1/Rxra/Pdgfb/Fgfr1/Kdr/Eng/Flt1/Tnf/Csf1/Src/Mmp14/Vdr/Clic4/Spint1/Plxna1/Socs3/Cdh1
C0_cDC2	GO:1900274	regulation of phospholipase C activity	12	-1.99781	0.00377987	0.0179813	Ms4a2/Gnaq/Fgfr1/Flt1/Ptafr/Itk/Gpr55
C0_cDC2	GO:1903036	positive regulation of response to wounding	27	-1.99783	0.00286241	0.0150463	Adra2a/Tlr4/S100a9/Braf/Igf1r/Plek/Hopx/Enpp4/Nfe2l2/F2r/Lrp1/Hbegf/Pdpn/Ccl2/Ptger4
C0_cDC2	GO:0033003	regulation of mast cell activation	23	-1.99899	0.00322992	0.0162641	Gata2/Nectin2/Il4ra/Ms4a2/Plscr1/Havcr1/Adora2b/Adora3/Cd84/Cd226/Nr4a3
C0_cDC2	GO:0006911	phagocytosis, engulfment	22	-1.99984	0.00329367	0.0164974	Siglece/Fcgr3/Mfge8/Fcgr1/Aif1/Fcgr2b
C0_cDC2	GO:0070830	bicellular tight junction assembly	12	-2.00039	0.00373716	0.0178079	Tnf/Itgb1/Afdn/Cdh1/Cldn1
C0_cDC2	GO:0032652	regulation of interleukin-1 production	42	-2.0008	0.00192219	0.0110436	Naip5/Usp50/Tlr4/Tlr2/P2rx7/Jak2/Egr1/Ifi204/Tnfaip3/App/Casp4/F2r/Malt1/Ifi211/Cx3cl1/Nod2/Ifi205/Ccr5/Ptger4
C0_cDC2	GO:0048812	neuron projection morphogenesis	193	-2.00139	5.86121e-05	0.00073781	Klk8/Cyfip1/Lrp4/Epha2/Ret/Dpysl2/Csf1r/Braf/Scn1b/Vasp/B4galt5/Stxbp5/Sema6d/Dbn1/Adora2a/Picalm/Thy1/Plxnd1/Pdlim5/Bmpr2/Ptprs/Enah/Fn1/Igf1r/Myo9a/Plppr4/Apoe/Plxna4/Nsmf/Pip5k1c/Dock7/Smurf1/Lpar3/Gas7/Apbb2/Fyn/App/Alcam/Kdr/Ngfr/Lrp1/Nectin1/Gata3/Sema4c/Prkca/Bhlhe22/Itgb1/Skil/B4galt6/Sema4a/Tubb2b/Nrp2/Tnfrsf12a/Rap2a/Olfm1/Afdn/Lifr/Plxna1/Nr4a3/Flrt3/Ccr5/Dst/Egr2
C0_cDC2	GO:0050804	modulation of chemical synaptic transmission	157	-2.00212	5.90633e-05	0.000738941	Braf/Ophn1/Celf4/Stxbp5/Dbn1/Plcg1/Adora2a/P2ry1/Vhl/Ptprs/Jak2/Nf1/Apoe/Cdc20/Egr1/Nsmf/Cyth1/Synpo/Sct/Prnp/Hrh2/Kmo/Fyn/App/Kdr/Ngfr/F2r/Il1b/Tnf/Ccr2/Src/Adora2b/Pacsin2/Plk2/Prkca/Hrh1/Itgb1/Cacnb3/Stx3/Tubb2b/Plat/Ccl2/Afdn/Htr7/Ptger4/Cdh1/Fcgr2b
C0_cDC2	GO:1901739	regulation of myoblast fusion	11	-2.00214	0.00358821	0.0173308	Capn2/Il4ra/Ehd1/Cflar/Cxcl10/Cxcl9
C0_cDC2	GO:0034762	regulation of transmembrane transport	168	-2.00215	5.8713e-05	0.00073781	Fxyd2/Ank2/Pkd2/Irs2/Braf/Scn1b/Plcg1/Gpr35/Thy1/P2rx7/Ctss/Pde4b/Rangrf/Ms4a2/Rem1/Slc31a2/P2ry6/Nfe2l2/Chchd10/Prnp/Fyn/Wnk1/Prkcd/Cacnb2/Alox5/F2r/Asph/Il1b/Chd7/Tnf/Ptafr/Atp1b1/Kcne3/Clec4b1/Cox17/Cx3cl1/Prkca/Cacnb3/Pea15a/Clic4/Hk2/Ccl2/Cttnbp2nl/Ramp3/Cd63/Stk39/Nr4a3/Fabp5/Dapk1/Cxcl10
C0_cDC2	GO:0055076	transition metal ion homeostasis	44	-2.00326	0.00181663	0.0106157	Picalm/Atox1/Sco2/Slc31a2/Slc39a10/Prnp/App/Hfe/Hif1a/Aplp2/Mt1/Slc30a4/Trf/Mt2
C0_cDC2	GO:1904951	positive regulation of establishment of protein localization	176	-2.00327	5.86201e-05	0.00073781	Rasgrp1/Nnat/Myo18a/Adrb1/Usp50/Tlr4/Il1rap/Il5/Ubr5/Tlr2/Csf1r/Irs2/Cd81/Adora2a/P2rx7/Jak2/Il17f/Il4ra/Pik3r2/Bag3/Jup/Prnp/Prr5l/Fyn/Oxct1/Prkcd/Casp4/F2r/Asph/Lrp1/Edem1/Il1b/Tnf/Gata3/Src/Cacnb3/Arid5a/Hif1a/Cd84/Clec5a/Nod2/Cd274/Wls/Ccl2/Cd14/Aif1/Ccr5/Ptger4/Cdh1/Il1rl1/Clec4n/Il1a/Mmp12/Cd209d
C0_cDC2	GO:0048260	positive regulation of receptor-mediated endocytosis	18	-2.00352	0.00334306	0.0166275	Hfe/Hip1/Cd63/Trf/Dab2
C0_cDC2	GO:1902105	regulation of leukocyte differentiation	151	-2.00441	7.89983e-05	0.000919488	Gata2/Ppp2r3c/Csf1r/Stat5a/Braf/Sh3rf1/Zbtb16/Clptm1/Cd74/Jak3/Tgfbr2/Nfkbiz/Pnp/Tfe3/Ctnnbip1/Nf1/Il4ra/Cd83/Slamf8/Atp11c/Tmem176b/Lif/Nfkbid/Kitl/Ctla2a/Pilrb1/Il1b/Tnf/Csf1/Malt1/Ccr2/Gata3/Il1rl2/Prkca/Cd1d1/Egr3/Mmp14/Tnfsf9/C1qc/Runx1/Tjp2/Tmem176a/Il12b/Gpr55/Il2ra/Il7r/Socs1/Dcstamp/Trib1/Ccr1/Axl
C0_cDC2	GO:0014812	muscle cell migration	39	-2.00529	0.00189064	0.0109357	Plau/Egr1/Rbpj/Dock7/P2ry6/Nfe2l2/Dock4/Pdgfb/Lrp1/Src/Plat/Plxna1/Trib1/Aif1/Nr4a3/Ptger4
C0_cDC2	GO:0045124	regulation of bone resorption	24	-2.00801	0.00292813	0.0152027	Csf1r/Plekhm1/Idua/P2rx7/S1pr1/Nf1/Ltbp3/Prkca/Dcstamp/Ptger4/Trf
C0_cDC2	GO:0071560	cellular response to transforming growth factor beta stimulus	88	-2.00987	0.000304767	0.00279205	Zfp703/Cav1/Hspa5/Bmp2/Lrrc32/Dbn1/Tgfbr2/Bmpr2/Il17f/Igf1r/Ltbp3/Col4a2/Smurf1/Cav2/Fyn/Itgb5/Hipk2/Eng/Ski/Tgfbr1/Src/Nrep/Skil/Htra3/Cflar/Chst11/Furin/Runx1/Ccl2/Got1/Pmepa1/Dab2
C0_cDC2	GO:0002790	peptide secretion	240	-2.01007	1.9305e-05	0.000372134	Adra2a/Optn/Rasgrp1/Htt/Nnat/Myo18a/Adrb1/Itsn1/Usp50/Tlr4/S100a9/Rab11fip5/Il1rap/Rab8b/Il5/Ubr5/Ffar4/Tlr2/Srgn/Csf1r/Irs2/Lrrc32/Idua/Cd74/Plcg1/Adora2a/Dgat1/P2rx7/Jak2/Il17f/Fn1/Il4ra/Nucb2/Apoe/Birc5/Ms4a2/Rbpj/Plek/Anxa4/Sct/Tnfaip3/Lif/Oxct1/Casp4/F2r/Isg15/Lrp1/Hfe/Il1b/Chd7/Tnf/Gata3/Src/Cx3cl1/Tmem106a/Arid5a/Hif1a/Cd84/Clec5a/Cd40/Nod2/Rsad2/Cd274/Wls/Cd14/Socs1/Tnfrsf9/Cd200r1/Il1rn/…
C0_cDC2	GO:0034105	positive regulation of tissue remodeling	21	-2.01018	0.00310711	0.0158709	B4galt1/Tnfrsf11a/Plekhm1/Idua/Ltbp3/Tmbim1/Prkca/Vdr/Dcstamp/Ptger4/Trf
C0_cDC2	GO:1904018	positive regulation of vasculature development	79	-2.01079	0.000490577	0.00403837	Plcg1/Tgfbr2/Itga5/Egr1/Erap1/Nfe2l2/Itgax/Jup/Pdgfb/Kdr/Hipk2/Eng/Flt1/Il1b/Ets1/Tlr3/Plk2/Cx3cl1/Prkca/Itgb1/Cysltr1/Hif1a/Cflar/C3ar1/Cd40/Runx1/Hk2/Ccl24/Il1a
C0_cDC2	GO:0045597	positive regulation of cell differentiation	392	-2.0108	1.87526e-05	0.000372134	Adrb1/Itsn1/Zfp703/Cebpd/Cyfip1/S100a9/Il1rap/Tspo/Wnt4/Ret/Il5/Hspa5/Tlr2/Gata2/Bmp2/Ppp2r3c/Csf1r/Stat5a/Braf/Scn1b/Zbtb16/Cd74/Dbn1/Tgfbr2/Picalm/Plxnd1/Nfkbiz/Pnp/Bmpr2/Ctnnbip1/Sav1/Jak2/Nf1/Capn2/Fn1/Nedd9/Igf1r/Il4ra/Ltbp3/Zfhx3/Cd83/Apoe/Arsb/Plxna4/Rbpj/Hopx/Nsmf/Aspm/D16Ertd472e/Smurf1/Lpar3/Atp11c/Nfe2l2/Fndc3b/Pdlim7/Calr/Ifi204/Dock1/Lif/Nfkbid/Fyn/Fgfr1/Kdr/Ngfr/Eng/Isg15/Flt1/Lrp1/…
C0_cDC2	GO:0050704	regulation of interleukin-1 secretion	20	-2.01236	0.00337917	0.0167484	Zc3h12a/Hk1/Usp50/Tlr4/Tlr2/P2rx7/Tnfaip3/Casp4/Nod2/Ccr5/Ptger4
C0_cDC2	GO:0043066	negative regulation of apoptotic process	327	-2.01304	1.8993e-05	0.000372134	Htt/Myo18a/Bcl3/Bcl2l2/Ptcra/Atf5/Clu/Noc2l/Itsn1/Naip5/Cav1/Wnt4/Hspa5/Ccl12/Ffar4/Gata2/Pih1d1/Grk5/Csf1r/Ybx3/Cpeb4/Irs2/Stat5a/Braf/Hipk3/Sh3rf1/Bcl2a1c/Cd74/Jak3/Adora2a/Bcl2a1b/Slc35f6/Vhl/Pnp/Atox1/Jak2/Itga5/Fn1/Epcam/Igf1r/Timp1/Apoe/Birc5/Icam1/Rbpj/Bag3/Dhcr24/Gnaq/Stk40/Ddx3x/Sct/Slc39a10/Nfe2l2/Prnp/Birc3/Tnfaip3/Apbb2/Fyn/Hyou1/Prkcd/Kdr/Ier3/Ngfr/Hipk2/F2r/Insl6/Lrp1/Kitl/Ago4/Bcl2…
C0_cDC2	GO:0051767	nitric-oxide synthase biosynthetic process	14	-2.0145	0.00314351	0.0159421	Tlr4/Tlr2/Jak3/Jak2/Nampt/Kdr/Nod2/Ccl2/Ptger4
C0_cDC2	GO:0051769	regulation of nitric-oxide synthase biosynthetic process	14	-2.0145	0.00314351	0.0159421	Tlr4/Tlr2/Jak3/Jak2/Nampt/Kdr/Nod2/Ccl2/Ptger4
C0_cDC2	GO:0098657	import into cell	267	-2.01479	1.92267e-05	0.000372134	Adrb1/Mctp1/Itsn1/Tlr4/Lrp4/Cav1/Cltc/Tlr2/Dpysl2/Gata2/Rin2/Ank2/Slc12a7/Ophn1/Cd81/Tgfbr2/Slc7a1/Picalm/Il10ra/Scamp1/P2rx7/Npc1/Apoe/Snx18/Atp1a1/Pip5k1c/Fcho2/P2ry6/Slc39a10/Canx/Clcn5/Prnp/Calr/Cav2/Dock1/Fyn/App/Prkcd/Cd302/Siglece/Rab20/Lrp1/Inppl1/Hfe/Il1b/Tnf/Ly75/Atp1b1/Myo1e/Ccr2/Ehd1/Src/Pacsin2/Prkca/Itgb1/Hip1/Cd209e/Cd209b/Nod2/Lrp12/Ccl2/Ramp3/Pros1/Fcgr3/Cd14/Cd63/Mfge8/Cxcl16/Fc…
C0_cDC2	GO:0050673	epithelial cell proliferation	153	-2.01612	7.88939e-05	0.000919488	Zfp703/Klk8/Kdm5b/Cav1/Epha2/Ccl12/Gata2/Bmp2/Stat5a/Maged1/Plcg1/Arg1/Vhl/Bmpr2/Sav1/Nf1/Apoe/Birc5/Plau/Cav2/Tnfaip3/Mki67/Pdgfb/Fgfr1/Kdr/Ngfr/Eng/Flt1/Jaml/Tnf/Gata3/Tgfbr1/Adora2b/Sulf2/Prkca/Egr3/Ehf/Cflar/Nod2/Vdr/Cyp7b1/Ccl2/Klf9/Ccnd2/Aldh1a2/Ccl24/Mtss1/Nr4a3/Cdh1/Mmp12/Dab2
C0_cDC2	GO:0002705	positive regulation of leukocyte mediated immunity	71	-2.01861	0.000552848	0.00444784	Itgam/Gata2/Stat5a/Cd81/Arg1/Pvr/Pnp/P2rx7/Nectin2/Il4ra/Ms4a2/Il1b/Tnf/Malt1/Ptafr/Gata3/Cxcl1/Adora2b/Adora3/Cd1d1/Arid5a/Cd40/Nod2/Rsad2/Cd226/Il12b/Fcgr3/Fcgr1
C0_cDC2	GO:0032990	cell part morphogenesis	208	-2.01986	1.94295e-05	0.000372134	Klk8/Cyfip1/Lrp4/Epha2/Ret/Dpysl2/Csf1r/Braf/Scn1b/Vasp/B4galt5/Stxbp5/Sema6d/Dbn1/Adora2a/Picalm/Thy1/Plxnd1/Pdlim5/Bmpr2/Ptprs/Nectin2/Enah/Fn1/Igf1r/Myo9a/Plppr4/Apoe/Plxna4/Nsmf/Pip5k1c/Dock7/Smurf1/Lpar3/Gas7/Apbb2/Fyn/App/Alcam/Kdr/Ngfr/Lrp1/Nectin1/Gata3/Sema4c/Src/Pacsin2/Prkca/Bhlhe22/Itgb1/Skil/Pdpn/B4galt6/Sema4a/Tubb2b/Nrp2/Tnfrsf12a/Rap2a/Olfm1/Afdn/Lifr/Plxna1/Nr4a3/Flrt3/Ccr5/Dst/E…
C0_cDC2	GO:0050702	interleukin-1 beta secretion	22	-2.0215	0.00261368	0.0139528	Zc3h12a/Hk1/Usp50/Tlr4/Tlr2/P2rx7/Tnfaip3/Casp4/Tmem106a/Nod2/Ccr5/Gbp5
C0_cDC2	GO:0042446	hormone biosynthetic process	23	-2.02304	0.00269868	0.0143257	Wnt4/Bmp2/Igf1r/Egr1/Atp1a1/Hfe/Il1b/Tnf/Hif1a/Vdr/Dab2
C0_cDC2	GO:0071559	response to transforming growth factor beta	90	-2.02333	0.000284935	0.0026445	Zfp703/Cav1/Hspa5/Bmp2/Lrrc32/Dbn1/Tgfbr2/Bmpr2/Il17f/Igf1r/Ltbp3/Zfhx3/Col4a2/Smurf1/Cav2/Fyn/Itgb5/Hipk2/Eng/Ski/Tgfbr1/Src/Nrep/Skil/Htra3/Cflar/Chst11/Furin/Runx1/Ccl2/Got1/Pmepa1/Dab2
C0_cDC2	GO:0044070	regulation of anion transport	39	-2.02352	0.00161755	0.00973269	Dpysl2/Irs2/Arg1/Adora2a/P2rx7/Apoe/Prnp/Hrh2/Kmo/Prkcd/Fgfr1/Il1b/Tnf/Ptafr/Prkca/Stk39/Il1rn/Il1a
C0_cDC2	GO:0051928	positive regulation of calcium ion transport	52	-2.02373	0.00111906	0.00730601	Cask/Htt/Adrb1/Cav1/Tspo/Ccl12/Ank2/Pkd2/Jak3/Plcg1/Thy1/P2rx7/P2ry6/Lpar3/Orai1/Pdgfb/Cacnb2/F2r/Asph/Atp1b1/Kcne3/Clec4b1/Cx3cl1/Cacnb3/Ramp3/Ccr1/Cxcl10
C0_cDC2	GO:0050708	regulation of protein secretion	181	-2.0248	3.91405e-05	0.000543678	Cask/Otud5/Adra2a/Rasgrp1/Nnat/Myo18a/Adrb1/Usp50/Tlr4/Rab11fip5/Il1rap/Il5/Ubr5/Ffar4/Tlr2/Srgn/Csf1r/Irs2/Lrrc32/Idua/Adora2a/P2rx7/Jak2/Il17f/Fn1/Il4ra/Apoe/Birc5/Anxa4/Tnfaip3/Oxct1/Casp4/F2r/Lrp1/Il1b/Tnf/Gata3/Src/Cx3cl1/Arid5a/Hif1a/Cd84/Clec5a/Cd40/Nod2/Rsad2/Cd274/Wls/Cd14/Socs1/Tnfrsf9/Cd200r1/Aif1/Ccr5/Ptger4/Il1rl1/Clec4n/Il1a/Mmp12/Cd209d
C0_cDC2	GO:0007268	chemical synaptic transmission	192	-2.02639	3.90846e-05	0.000543678	Adrb1/Mctp1/Cyfip1/Snap23/Srgn/Sv2b/Slc12a7/Cep89/Braf/Exoc4/Ophn1/Celf4/Stxbp5/Dbn1/Plcg1/Adora2a/P2ry1/Vhl/Stx11/P2rx7/Ptprs/Jak2/Pdlim4/Nf1/Apoe/Cdc20/Egr1/Nsmf/Cyth1/Synpo/Sct/Prnp/Hrh2/Kmo/Cav2/Fyn/App/Kdr/Cacnb2/Ngfr/F2r/Il1b/Tnf/Ccr2/Src/Adora2b/Pacsin2/Plk2/Cx3cl1/Prkca/Hrh1/Itgb1/Egr3/Cacnb3/Stx3/Tubb2b/Plat/Ccl2/Afdn/Htr7/Ptger4/Cdh1/Fcgr2b
C0_cDC2	GO:0098916	anterograde trans-synaptic signaling	192	-2.02639	3.90846e-05	0.000543678	Adrb1/Mctp1/Cyfip1/Snap23/Srgn/Sv2b/Slc12a7/Cep89/Braf/Exoc4/Ophn1/Celf4/Stxbp5/Dbn1/Plcg1/Adora2a/P2ry1/Vhl/Stx11/P2rx7/Ptprs/Jak2/Pdlim4/Nf1/Apoe/Cdc20/Egr1/Nsmf/Cyth1/Synpo/Sct/Prnp/Hrh2/Kmo/Cav2/Fyn/App/Kdr/Cacnb2/Ngfr/F2r/Il1b/Tnf/Ccr2/Src/Adora2b/Pacsin2/Plk2/Cx3cl1/Prkca/Hrh1/Itgb1/Egr3/Cacnb3/Stx3/Tubb2b/Plat/Ccl2/Afdn/Htr7/Ptger4/Cdh1/Fcgr2b
C0_cDC2	GO:0008347	glial cell migration	20	-2.02793	0.00312253	0.015921	Tspo/Ccl12/P2ry1/Fn1/Vcan/Hexb/Lrp1/Csf1/Ccr2/Syne2/Ccl2
C0_cDC2	GO:0016064	immunoglobulin mediated immune response	45	-2.02796	0.0013961	0.0087192	Cd55/Cd74/Cd81/Nectin2/Il4ra/Icosl/Prkcd/Tnf/Cd40/Nod2/C1qc/Cd226/Fcgr3/Fcgr1/C1qb/C1qa/Fcgr2b
C0_cDC2	GO:0050877	nervous system process	247	-2.03061	1.9266e-05	0.000372134	Rac3/Pomk/Wnt10b/Hexa/Adra2a/Psap/Htt/Spata7/Cnnm4/Adrb1/Zmpste24/Klk8/Cyfip1/Rcan1/Tlr4/Tlr2/Gch1/Tjp1/Braf/Ctsc/Scn1b/Celf4/Fbxo11/Idua/Dbn1/Gpr35/Adora2a/Picalm/P2ry1/Gatm/P2rx7/Ctss/Itga5/Nf1/Olfr920/Pbx3/Apoe/Slc4a7/Egr1/Icam1/Pde6a/Synpo/Sct/Mc1r/Itgax/Prnp/Hrh2/Hexb/Fyn/App/P2rx5/Fgfr1/Cacnb2/Ngfr/Alox5/F2r/Il1b/Chd7/Tnf/Ptafr/Ccr2/Src/Comt/Plk2/Cx3cl1/Prkca/Calca/Hrh1/Itgb1/Cacnb3/Gprc5c/…
C0_cDC2	GO:0030048	actin filament-based movement	28	-2.03117	0.00239554	0.0131202	Adrb1/Cav1/Ank2/Scn1b/Dbn1/Pde4b/Nup155/Atp1a1/Jup/Apbb2/Cacnb2/Kcne3/Pdpn/Syne2
C0_cDC2	GO:0007160	cell-matrix adhesion	69	-2.03155	0.000533443	0.00431851	Thy1/Nf1/Fn1/Bst1/Plau/Nid2/Jup/Apod/Itgb5/Kdr/Lrp1/Csf1/Src/Itgb1/Mmp14/Actn1/Sdc4/Adam15/Cd63/Mmp12/Plet1
C0_cDC2	GO:0003254	regulation of membrane depolarization	15	-2.03213	0.0030316	0.0156257	Gclm/Tspo/Ppp2r3c/Scn1b/P2rx7/Rangrf/Kdr/Ngfr/Src/Got1
C0_cDC2	GO:0048871	multicellular organismal homeostasis	157	-2.03349	3.93755e-05	0.000543678	Rac3/Wnt10b/Tnfrsf11a/Spata7/Kdm6b/Acadvl/Adrb1/Tlr4/Cav1/Vps54/Ffar4/Gata2/Csf1r/Aqp3/Plekhm1/Idua/Vhl/Gatm/Tfe3/P2rx7/Ctss/Jak2/S1pr1/Nf1/Igf1r/Il4ra/Ltbp3/Pla2g4a/Egr1/Rbpj/Pde6a/Dock7/Acot11/Gadd45g/Kdr/F2r/Hfe/Il1b/Tnf/Csf1/Ccr2/Iqcb1/Src/Prkca/Itgb1/Nod2/Gpr55/Stk39/Il1rn/Dcstamp/Nr4a3/Ccr5/Ptger4/Fabp5/Cdh1/Trf/Il1a/Cldn1
C0_cDC2	GO:0010863	positive regulation of phospholipase C activity	11	-2.03668	0.00254165	0.013723	Ms4a2/Gnaq/Fgfr1/Flt1/Ptafr/Itk/Gpr55
C0_cDC2	GO:0090303	positive regulation of wound healing	19	-2.03691	0.00255591	0.0137477	Adra2a/Tlr4/S100a9/Plek/Hopx/Enpp4/Nfe2l2/F2r/Hbegf/Pdpn/Ccl2/Ptger4
C0_cDC2	GO:0043200	response to amino acid	24	-2.03723	0.00239767	0.0131202	Atp5g1/Rragd/Sh3bp4/Col4a1/Mtor/Rptor/Sesn3/Crls1/Klhl22/Cpeb4/Capn2/Igf1r/Sesn2/Nsmf/Fyn/Tnf/Socs1/Cdh1
C0_cDC2	GO:0008286	insulin receptor signaling pathway	41	-2.03847	0.00138255	0.00870606	Igf1r/Soga1/Nucb2/Pik3r2/Cav2/Prkcd/Inppl1/Il1b/Src/Prkca/Socs1/Socs3/Socs2/Cish
C0_cDC2	GO:0006878	cellular copper ion homeostasis	10	-2.03991	0.002241	0.0124549	Sco1/Atox1/Sco2/Slc31a2/Prnp/App/Aplp2
C0_cDC2	GO:1901701	cellular response to oxygen-containing compound	366	-2.04016	1.89018e-05	0.000372134	Clu/Kdm6b/Klhl22/Zfp703/Cyfip1/Tlr4/Ptpn2/Rab11fip5/Cav1/Rab8b/Ret/Ccl12/Uso1/Tlr2/Gch1/Pih1d1/Pkd2/Cpeb4/Irs2/Stat5a/Agap3/Pde2a/Cxcl2/Acod1/Pde4b/Jak2/Irgm2/Pde8a/Capn2/Igf1r/Soga1/Sbno2/Nucb2/Pdia3/Birc5/Cd86/Egr1/Pik3r2/Icam1/Sesn2/Nsmf/Plscr1/P2ry6/Litaf/Nfe2l2/Jup/Prnp/Mapk13/Cav2/Tnfaip3/Fyn/App/Pdgfb/Oxct1/Prkcd/Ngfr/Casp4/Lrp1/Inppl1/Hsp90b1/Il1b/Tnf/Hk3/Cd80/Malt1/Cxcl1/Src/Ctnna1/Cx3cl…
C0_cDC2	GO:0007169	transmembrane receptor protein tyrosine kinase signaling pathway	178	-2.04145	3.90846e-05	0.000543678	Cyfip1/Ptpn2/Wnt4/Epha2/Ret/Hhex/Bmp2/Ptpn12/Csf1r/Irs2/Stat5a/Plcg1/Jak2/Igf1r/Soga1/Nucb2/Ptgir/Pik3r2/Rbpj/Col4a2/Cav2/Fyn/App/Pdgfb/Apod/Prkcd/Fgfr1/Kdr/Ngfr/Flt1/Lrp1/Inppl1/Il1b/Csf1/Myo1e/Gata3/Hbegf/Src/Sulf2/Prkca/Dok2/Csrnp1/Hip1/Hif1a/Aplp2/Nrp2/Blnk/Plat/Ccl2/Myof/Cd63/Socs1/Socs3/Socs2/Nr4a3/Flrt3/Gfra2/Axl/Cish
C0_cDC2	GO:0120039	plasma membrane bounded cell projection morphogenesis	198	-2.04239	1.94917e-05	0.000372134	Klk8/Cyfip1/Lrp4/Epha2/Ret/Dpysl2/Csf1r/Braf/Scn1b/Vasp/B4galt5/Stxbp5/Sema6d/Dbn1/Adora2a/Picalm/Thy1/Plxnd1/Pdlim5/Bmpr2/Ptprs/Enah/Fn1/Igf1r/Myo9a/Plppr4/Apoe/Plxna4/Nsmf/Pip5k1c/Dock7/Smurf1/Lpar3/Gas7/Apbb2/Fyn/App/Alcam/Kdr/Ngfr/Lrp1/Nectin1/Gata3/Sema4c/Src/Prkca/Bhlhe22/Itgb1/Skil/Pdpn/B4galt6/Sema4a/Tubb2b/Nrp2/Tnfrsf12a/Rap2a/Olfm1/Afdn/Lifr/Plxna1/Nr4a3/Flrt3/Ccr5/Dst/Egr2
C0_cDC2	GO:0000041	transition metal ion transport	27	-2.04421	0.0020779	0.0117088	Tcn2/Cltc/Slc39a11/Atox1/Sco2/Slc31a2/Slc39a10/Nectin1/Hfe/Hrh1/Slc30a4/Trf
C0_cDC2	GO:0001952	regulation of cell-matrix adhesion	44	-2.04528	0.0011902	0.00768222	Wnt4/Peak1/Thy1/Nf1/Bst1/Plau/Jup/Apod/Kdr/Lrp1/Csf1/Src/Mmp14/Sdc4/Adam15/Mmp12/Plet1
C0_cDC2	GO:0051882	mitochondrial depolarization	11	-2.04577	0.00226399	0.0125581	Gclm/Tspo/Ppp2r3c/P2rx7/Kdr/Ngfr/Src/Got1
C0_cDC2	GO:0007179	transforming growth factor beta receptor signaling pathway	72	-2.05081	0.000410366	0.00353163	Acvr1/Mtmr4/Nlk/Zfyve9/Zfp451/Zfp703/Cav1/Hspa5/Bmp2/Lrrc32/Tgfbr2/Bmpr2/Il17f/Ltbp3/Smurf1/Cav2/Itgb5/Hipk2/Eng/Ski/Tgfbr1/Src/Nrep/Skil/Htra3/Chst11/Furin/Ccl2/Got1/Pmepa1/Dab2
C0_cDC2	GO:0050865	regulation of cell activation	260	-2.05315	1.92493e-05	0.000372134	Clec4g/Tlr4/Ptpn2/Itgam/Cav1/Il5/Gata2/Ppp2r3c/Irs2/Stat5a/Braf/Ctsc/Lrrc32/Sh3rf1/Zbtb16/Clptm1/Cd74/Jak3/Cd81/Arg1/Tgfbr2/Adora2a/Thy1/Dgat1/Nfkbiz/Pnp/Jak2/Nectin2/Bst1/Il4ra/Cd83/Apoe/Slamf8/Cd86/Ms4a2/Plek/Icosl/Plscr1/Slc39a10/Atp11c/Prnp/Tnfaip3/Nfkbid/Pdgfb/Prkcd/Ctla2a/Hfe/Il1b/Cd80/Malt1/Ptafr/Havcr1/Ccr2/Gata3/Adora2b/Il1rl2/Cx3cl1/Prkca/Adora3/Cd1d1/Egr3/Slfn1/Pdpn/Cd209e/Cd84/Mmp14/C…
C0_cDC2	GO:1903523	negative regulation of blood circulation	17	-2.0536	0.00223971	0.0124549	Bmpr2/Jak2/Atp1a1/Dock4/F2r/Kcne3/Cx3cl1/Prkca/Hif1a
C0_cDC2	GO:1903844	regulation of cellular response to transforming growth factor beta stimulus	48	-2.05448	0.00104011	0.00696834	Smurf1/Cav2/Hipk2/Eng/Ski/Nrep/Skil/Htra3/Cflar/Chst11/Furin/Got1/Pmepa1/Dab2
C0_cDC2	GO:0071675	regulation of mononuclear cell migration	18	-2.05485	0.00210804	0.0118551	Csf1/Ccr2/Cx3cl1/C3ar1/Ccl2/Aif1/Ccr1/Cxcl10
C0_cDC2	GO:0007254	JNK cascade	77	-2.05523	0.000368558	0.00323057	Gadd45g/App/Hipk2/Il1b/Tnf/Tlr3/Lmnb1/Nod2/Gadd45b/Rap2a/Il1rn/Trib1/Ptger4/Trf/Il1a/Fcgr2b/Dab2
C0_cDC2	GO:0048858	cell projection morphogenesis	201	-2.05607	1.94568e-05	0.000372134	Klk8/Cyfip1/Lrp4/Epha2/Ret/Dpysl2/Csf1r/Braf/Scn1b/Vasp/B4galt5/Stxbp5/Sema6d/Dbn1/Adora2a/Picalm/Thy1/Plxnd1/Pdlim5/Bmpr2/Ptprs/Enah/Fn1/Igf1r/Myo9a/Plppr4/Apoe/Plxna4/Nsmf/Pip5k1c/Dock7/Smurf1/Lpar3/Gas7/Apbb2/Fyn/App/Alcam/Kdr/Ngfr/Lrp1/Nectin1/Gata3/Sema4c/Src/Pacsin2/Prkca/Bhlhe22/Itgb1/Skil/Pdpn/B4galt6/Sema4a/Tubb2b/Nrp2/Tnfrsf12a/Rap2a/Olfm1/Afdn/Lifr/Plxna1/Nr4a3/Flrt3/Ccr5/Dst/Egr2
C0_cDC2	GO:2000177	regulation of neural precursor cell proliferation	32	-2.05681	0.00166653	0.00991648	Nf1/Aspm/Ngfr/Il1b/Ctnna1/Cx3cl1/Hif1a/Spint1/Afdn/Ccr5/Trf
C0_cDC2	GO:0032350	regulation of hormone metabolic process	22	-2.05927	0.00178496	0.0104954	Zmpste24/Wnt4/Bmp2/Igf1r/Egr1/Atp1a1/Il1b/Tnf/Gata3/Hif1a/Vdr/Dab2
C0_cDC2	GO:0009719	response to endogenous stimulus	410	-2.06166	1.87038e-05	0.000372134	Zmpste24/Zfp703/Cyfip1/Tlr4/Ptpn2/Cav1/Rab8b/Wnt4/Hspa5/Uso1/Ubr5/Tlr2/Bmp2/Ptpn12/Pkd2/Cpeb4/Irs2/Stat5a/Pde2a/Braf/Lrrc32/Dbn1/Plcg1/Cd81/Tgfbr2/P2ry1/Casp7/Gatm/Acod1/Bmpr2/Cad/Pde4b/Jak2/Ass1/Pde8a/Npc1/Il17f/Capn2/Igf1r/Soga1/Rxra/Timp1/Ltbp3/Zfhx3/Nucb2/Apoe/Egr1/Pik3r2/Icam1/Rbpj/Sesn2/Nsmf/Atp1a1/Zfp366/Col4a2/P2ry6/Smurf1/Jup/Prnp/Calr/Mapk13/Cav2/Fyn/App/Pdgfb/Itgb5/Prkcd/Fgfr1/Kdr/Ngfr…
C0_cDC2	GO:0031347	regulation of defense response	277	-2.06269	1.91622e-05	0.000372134	Stat5a/Pde2a/Ctsc/Cd74/Cd81/Arg1/Adora2a/Pvr/Acod1/Nfkbiz/Ctss/Ptprs/Jak2/Nectin2/Irgm2/Il17f/Rftn1/Bst1/Sbno2/Pla2g4a/Apoe/Slamf8/Cd86/Fndc4/Plscr1/Cfh/Ifi204/Tnfaip3/Apod/Ier3/B430306N03Rik/Siglece/Ctla2a/Il1b/Tnf/Ccr2/Gata3/Ets1/Cxcl1/Ifi211/Tlr3/Zbp1/Adora2b/Irgm1/Il1rl2/Cx3cl1/Prkca/Adora3/Ddt/Nod2/Rsad2/Treml2/Cd226/Rora/Il12b/Serpinb9/Klrb1b/Scgb1a1/Il2ra/Fcgr3/Cd14/Socs1/Gbp4/Ifi205/Socs3…
C0_cDC2	GO:0061028	establishment of endothelial barrier	25	-2.06336	0.00180517	0.0105923	Tjp1/Pde2a/Ptprs/Icam1/Eng/Il1b/Tnf/Tjp2/F11r/Afdn/Cldn1
C0_cDC2	GO:0071605	monocyte chemotactic protein-1 production	10	-2.06534	0.00166475	0.00991648	Mcoln2/Erbin/Apod/Il1b/Cd84/Nod2/Il1a
C0_cDC2	GO:0071637	regulation of monocyte chemotactic protein-1 production	10	-2.06534	0.00166475	0.00991648	Mcoln2/Erbin/Apod/Il1b/Cd84/Nod2/Il1a
C0_cDC2	GO:0002526	acute inflammatory response	43	-2.06703	0.000981682	0.0066698	Ctnnbip1/Fn1/Cd163/Icam1/Plscr1/Cfh/Alox5/Il1b/Tnf/Cxcl1/Serpinb9/Fcgr3/Il1rn/Fcgr1/Ccr5/Il1a/Fcgr2b
C0_cDC2	GO:0042104	positive regulation of activated T cell proliferation	11	-2.06755	0.00173003	0.0102147	Gpam/Il23a/Stat5a/Jak3/Cd86/Icosl/Tnfsf9/Il12b/Il2ra
C0_cDC2	GO:0008284	positive regulation of cell proliferation	347	-2.06796	1.89118e-05	0.000372134	Cd74/Jak3/Plcg1/Cd81/Arg1/Tgfbr2/Slc35f6/Vhl/Pnp/Bmpr2/Jak2/Odc1/S1pr1/Nf1/Fn1/Epcam/Igf1r/Bst1/Timp1/Ltbp3/Pla2g4a/Cd86/Cdc20/Plau/Egr1/Nampt/Rbpj/Acer3/Aspm/Gnaq/Icosl/Nqo2/Hilpda/P2ry6/Slc39a10/Itgax/Fndc3b/Calr/Cav2/Tnfaip3/Lif/Pdgfb/Fgfr1/Kdr/Ngfr/Hipk2/F2r/Flt1/Kitl/Jaml/Il1b/Tnf/Csf1/Cd80/Ptafr/Ccr2/Ets1/Cxcl1/Hbegf/Tgfbr1/Adora2b/Cox17/Cx3cl1/Prkca/Cd1d1/Itgb1/Egr3/Stx3/Cd209e/Hif1a/Cflar…
C0_cDC2	GO:0048661	positive regulation of smooth muscle cell proliferation	49	-2.0687	0.000851311	0.00607468	Tgfbr2/Jak2/S1pr1/Igf1r/Egr1/Nampt/Rbpj/Gnaq/Nqo2/P2ry6/Pdgfb/Tnf/Ptafr/Hbegf/Cx3cl1/Prkca/Hif1a/C3ar1/Aif1/Nr4a3
C0_cDC2	GO:0006897	endocytosis	239	-2.0701	1.93114e-05	0.000372134	Snx18/Pip5k1c/Fcho2/P2ry6/Canx/Clcn5/Calr/Cav2/Dock1/App/Cd302/Siglece/Rab20/Lrp1/Inppl1/Hfe/Il1b/Tnf/Ly75/Myo1e/Ccr2/Ehd1/Src/Pacsin2/Prkca/Itgb1/Hip1/Cd209e/Cd209b/Nod2/Lrp12/Ccl2/Ramp3/Pros1/Fcgr3/Cd14/Cd63/Mfge8/Cxcl16/Fcgr1/Fnbp1l/Aif1/Trf/Axl/Fcgr2b/Mrc1/Dab2/Cd209d/Cd209a
C0_cDC2	GO:0007043	cell-cell junction assembly	31	-2.07098	0.00145754	0.00895978	Jup/Tnf/Fscn1/Ctnna1/Prkca/Itgb1/Ctnnd1/Rhoc/Afdn/Cdh1/Cldn1
C0_cDC2	GO:0051241	negative regulation of multicellular organismal process	481	-2.07143	1.85939e-05	0.000372134	Klk8/Tlr4/Ptpn2/Rab11fip5/Lrp4/Cav1/Tspo/Wnt4/Epha2/Stab1/Ubr5/Ffar4/Tlr2/Gata2/Srgn/Hhex/Bmp2/Ybx3/Stat5a/Ctsc/Lrrc32/Ptpn9/Celf4/Zbtb16/Idua/Cd74/Sema6d/Dbn1/Jak3/Gpr35/Arg1/Tgfbr2/Thy1/Acod1/Ttc3/Tfe3/Bmpr2/P2rx7/Sav1/Ptprs/Pde4b/Jak2/Il17f/Nf1/Fn1/Timp1/Il4ra/Ltbp3/Cd83/Apoe/Slamf8/Cd86/Plau/Pik3r2/Rbpj/Rflnb/Aspm/Atp1a1/Laptm4b/Col4a2/Anxa4/Dock7/Sct/Smurf1/Mc1r/Nfe2l2/Jup/Lfng/Fndc3b/Acot11…
C0_cDC2	GO:0034394	protein localization to cell surface	20	-2.07292	0.00192485	0.0110436	Rab11fip5/Ank2/Picalm/Rangrf/Smurf1/Pigu/Hfe/Tnf/Stx3/Cdh1
C0_cDC2	GO:2000107	negative regulation of leukocyte apoptotic process	28	-2.07449	0.00163236	0.00980106	Ptcra/Noc2l/Irs2/Stat5a/Cd74/Jak3/Vhl/Pnp/Slc39a10/Kitl/Fcmr/Hif1a/Nod2/Bcl2a1a/Serpinb9/Il7r/Ccr5/Axl/Fcgr2b
C0_cDC2	GO:0045765	regulation of angiogenesis	117	-2.07492	0.000100355	0.00112208	Plcg1/Tgfbr2/Plxnd1/Il17f/Itga5/Nf1/Pik3r2/Erap1/Col4a2/Nfe2l2/Itgax/Jup/Lif/Kdr/Ngfr/Hipk2/Eng/Flt1/Il1b/Ccr2/Ets1/Tlr3/Plk2/Cx3cl1/Prkca/Itgb1/Cysltr1/Hif1a/Sema4a/C3ar1/Cd40/Runx1/Hk2/Tnfrsf12a/Ccl2/Spred1/Ccl24/Il1a/Cxcl10
C0_cDC2	GO:0002821	positive regulation of adaptive immune response	62	-2.07519	0.000412763	0.00354153	Cd74/Cd81/Pvr/Nfkbiz/Pnp/P2rx7/Nectin2/Nfkbid/Il1b/Tnf/Malt1/Ccr2/Gata3/Cd1d1/Arid5a/Cd40/Nod2/Rsad2/Cd274/Cd226/Il12b/Fcgr3/Fcgr1
C0_cDC2	GO:0002824	positive regulation of adaptive immune response based on somatic recombination of immune receptors built from immunoglobulin superfamily domains	59	-2.07537	0.000391882	0.00339312	Cd81/Pvr/Nfkbiz/Pnp/P2rx7/Nectin2/Nfkbid/Il1b/Tnf/Malt1/Ccr2/Gata3/Cd1d1/Arid5a/Cd40/Nod2/Rsad2/Cd274/Cd226/Il12b/Fcgr3/Fcgr1
C0_cDC2	GO:0097756	negative regulation of blood vessel diameter	32	-2.07625	0.00151886	0.00926005	Bmpr2/Icam1/Hrh2/Dock4/Pdgfb/Alox5/F2r/Ptafr/Cx3cl1/Hrh1/Cysltr1/Hif1a/Tbxas1/Htr7
C0_cDC2	GO:0001936	regulation of endothelial cell proliferation	53	-2.07657	0.000662993	0.00502106	Cav1/Ccl12/Gata2/Bmp2/Stat5a/Plcg1/Arg1/Bmpr2/Nf1/Apoe/Cav2/Pdgfb/Fgfr1/Kdr/Ngfr/Eng/Flt1/Tnf/Tgfbr1/Adora2b/Prkca/Egr3/Ccl2/Aldh1a2/Ccl24
C0_cDC2	GO:0002706	regulation of lymphocyte mediated immunity	76	-2.07665	0.000266148	0.00251953	Cd55/Stat5a/Cd81/Arg1/Pvr/Pnp/P2rx7/Nectin2/Hfe/Il1b/Tnf/Malt1/Ccr2/Gata3/Cd1d1/Arid5a/Cd40/Nod2/Rsad2/Cd226/Il12b/Serpinb9/Klrb1b/Fcgr3/Il7r/Fcgr1/Fcgr2b
C0_cDC2	GO:0030574	collagen catabolic process	12	-2.07717	0.00200739	0.011402	Idua/Mmp19/Ctss/Itgb1/Mmp14/Adam15/Mmp25/Mmp12
C0_cDC2	GO:0099177	regulation of trans-synaptic signaling	158	-2.07782	3.93902e-05	0.000543678	Braf/Ophn1/Celf4/Stxbp5/Dbn1/Plcg1/Adora2a/P2ry1/Vhl/Ptprs/Jak2/Nf1/Apoe/Cdc20/Egr1/Nsmf/Cyth1/Synpo/Sct/Prnp/Hrh2/Kmo/Fyn/App/Kdr/Ngfr/F2r/Il1b/Tnf/Ccr2/Src/Adora2b/Pacsin2/Plk2/Prkca/Hrh1/Itgb1/Cacnb3/Stx3/Tubb2b/Plat/Ccl2/Afdn/Htr7/Ptger4/Fabp5/Cdh1/Fcgr2b
C0_cDC2	GO:0086003	cardiac muscle cell contraction	16	-2.07798	0.00198557	0.0113006	Dlg1/Adrb1/Cav1/Ank2/Scn1b/Pde4b/Nup155/Atp1a1/Jup/Cacnb2/Kcne3
C0_cDC2	GO:0007565	female pregnancy	43	-2.07839	0.000877248	0.00619747	Prdm1/Atr/Mtor/Ddr1/Vmp1/Grn/Mmp9/Adra2a/Kpna6/Il11ra1/Wnt4/Stat5a/Acod1/Bmpr2/Rxra/Timp1/Pla2g4a/Calr/Lif/Comt/Vdr/Klf9/Cdh1/Mmp12
C0_cDC2	GO:1903557	positive regulation of tumor necrosis factor superfamily cytokine production	49	-2.07913	0.000726729	0.00535676	App/Ptafr/Ccr2/Tlr3/Ddt/Arid5a/Cd84/Cd209b/Nod2/Il12b/Ccl2/Fcgr3/Cd14/Ccr5
C0_cDC2	GO:0099536	synaptic signaling	199	-2.07951	1.94848e-05	0.000372134	Adrb1/Mctp1/Cyfip1/Il1rap/Snap23/Srgn/Sv2b/Slc12a7/Cep89/Braf/Exoc4/Ophn1/Celf4/Stxbp5/Dbn1/Plcg1/Daglb/Adora2a/P2ry1/Vhl/Stx11/P2rx7/Ptprs/Jak2/Pdlim4/Nf1/Apoe/Cdc20/Egr1/Nsmf/Cyth1/Synpo/Sct/Prnp/Hrh2/Kmo/Cav2/Fyn/App/Kdr/Cacnb2/Ngfr/F2r/Il1b/Tnf/Ccr2/Src/Adora2b/Pacsin2/Plk2/Cx3cl1/Prkca/Hrh1/Itgb1/Egr3/Cacnb3/Stx3/Tubb2b/Plat/Ccl2/Afdn/Htr7/Ptger4/Fabp5/Cdh1/Fcgr2b
C0_cDC2	GO:0002250	adaptive immune response	191	-2.08201	1.95829e-05	0.000372134	Cd74/Jak3/Cd81/Arg1/Pvr/Stx11/Nfkbiz/Pnp/Tfe3/P2rx7/Jak2/Nectin2/Rftn1/Il4ra/Cd86/Icam1/Erap1/Icosl/Cd79a/Orai1/Tnfaip3/Gadd45g/Nfkbid/Fyn/Alcam/Prkcd/Serpina3g/Hfe/Il1b/Tnf/Malt1/Il18bp/Ccr2/Gata3/Itk/Cd1d1/Arid5a/Sema4a/Cd84/C3ar1/Cd40/Nod2/Rsad2/C1qc/Cd274/Cd226/Rora/Il12b/Serpinb9/Pdcd1lg2/Fcgr3/Il7r/Fcgr1/C1qb/C1qa/Il1rl1/Clec4n/Fcgr2b
C0_cDC2	GO:0022600	digestive system process	25	-2.08228	0.00155032	0.0093679	Adrb1/Tlr4/Dgat1/Epb41/Sct/Hrh2/Wnk1/Lima1/Nod2/Vdr/Tjp2/F11r/Stk39
C0_cDC2	GO:0002861	regulation of inflammatory response to antigenic stimulus	14	-2.08362	0.00183906	0.0107027	Tnf/Nod2/Il12b/Fcgr3/Fcgr1/Fcgr2b
C0_cDC2	GO:0035295	tube development	356	-2.0844	1.88847e-05	0.000372134	Mthfd1/Kdm5b/Cav1/Wnt4/Epha2/Ret/Stab1/Ccl12/Gata2/Hhex/Bmp2/Pkd2/Mgp/Maged1/Vasp/Tnfaip2/Plcg1/Pofut1/Tgfbr2/Thy1/Mmp19/Vhl/Plxnd1/Bmpr2/Ctnnbip1/Sav1/S1pr1/Enah/Il17f/Itga5/Nf1/Fn1/Epcam/Rxra/Ltbp3/Vcan/Apoe/Plau/Pik3r2/Rbpj/Erap1/Hopx/Luzp1/Col4a2/Stk40/Nfe2l2/Itgax/Jup/Fndc3b/Hrh2/Lif/Pdgfb/Fgfr1/Kdr/Ngfr/Hipk2/Eng/Flt1/Lrp1/Il1b/Chd7/Tnf/Csf1/Ski/Myo1e/Ccr2/Gata3/Ets1/Hbegf/Tgfbr1/Sema4c/Tlr…
C0_cDC2	GO:0043406	positive regulation of MAP kinase activity	80	-2.08622	0.000265252	0.00251945	Map2k5/Shc1/Map3k20/Iqgap1/Pik3cg/Map2k3/Map4k1/Adra2a/Rasgrp1/Tnfrsf11a/Tlr4/Ret/Mdfic/Bmp2/Maged1/Cd74/Cd81/P2rx7/Jak2/Lpar3/Gadd45g/Pdgfb/Prkcd/Fgfr1/F2r/Flt1/Kitl/Il1b/Tnf/Tgfbr1/Src/Cd40/Nod2/Gadd45b/Stk39/Il1rn/Trf/Dab2
C0_cDC2	GO:0032760	positive regulation of tumor necrosis factor production	48	-2.08796	0.000748877	0.00546738	App/Ptafr/Ccr2/Tlr3/Ddt/Arid5a/Cd84/Cd209b/Nod2/Il12b/Ccl2/Fcgr3/Cd14/Ccr5
C0_cDC2	GO:0007229	integrin-mediated signaling pathway	30	-2.08919	0.00139367	0.0087192	Thy1/Itga5/Timp1/Plek/Itgax/Itgb5/Isg15/Src/Ctnna1/Itgb1/Adam15/Cd63/Itgae/Dab2
C0_cDC2	GO:0032102	negative regulation of response to external stimulus	110	-2.09006	0.000121224	0.00131907	Klk8/Ptpn2/Wnt4/Ccl12/Ffar4/Sema6d/Dbn1/Adora2a/Acod1/Ptprs/Nucb2/Apoe/Slamf8/Plau/Fndc4/Tnfaip3/Pdgfb/Apod/Prkcd/Ier3/Siglece/Ctla2a/Gata3/Ets1/Sema4c/Cx3cl1/Cacnb3/Ddt/Sema4a/Nod2/Rora/Il12b/Il2ra/Pros1/Socs3/Cdkn1a/Cd200r1/Trib1/Aif1/Ptger4/Fcgr2b
C0_cDC2	GO:0007422	peripheral nervous system development	16	-2.09018	0.00187882	0.0108895	Slc5a3/Nf1/Plxna4/Ski/Egr3/Adgrg6/Egr2/Cldn1
C0_cDC2	GO:0044319	wound healing, spreading of cells	11	-2.09031	0.00151645	0.00926005	Hbegf/Pdpn/Mmp12/Plet1
C0_cDC2	GO:0090505	epiboly involved in wound healing	11	-2.09031	0.00151645	0.00926005	Hbegf/Pdpn/Mmp12/Plet1
C0_cDC2	GO:0110110	positive regulation of animal organ morphogenesis	29	-2.09057	0.00139691	0.0087192	Acvr1/B4galt1/Wnt4/Bmp2/Maged1/Tgfbr2/Rbpj/Tnfaip3/Lif/Fgfr1/Ngfr/Eng/Csf1/Gata3/Tgfbr1/Cflar/Vdr
C0_cDC2	GO:0061337	cardiac conduction	14	-2.09195	0.00166799	0.00991648	Slc9a1/Tmem65/Zmpste24/Cav1/Ank2/Scn1b/Rangrf/Nup155/Jup/Cacnb2/Kcne3
C0_cDC2	GO:0090504	epiboly	12	-2.09271	0.00168706	0.0100026	Hbegf/Pdpn/Mmp12/Plet1
C0_cDC2	GO:1903115	regulation of actin filament-based movement	16	-2.09461	0.00183612	0.0107027	Dlg1/Adrb1/Cav1/Ank2/Dbn1/Pde4b/Rangrf/Atp1a1/Jup/Kcne3/Pdpn
C0_cDC2	GO:0072358	cardiovascular system development	262	-2.09704	1.92304e-05	0.000372134	Cav1/Wnt4/Epha2/Stab1/Ccl12/Dctn5/Gata2/Hhex/Pkd2/Pde2a/Tnfaip2/Plcg1/Pofut1/Tgfbr2/Thy1/Mmp19/Vhl/Plxnd1/Bmpr2/S1pr1/Il17f/Itga5/Nf1/Fn1/Rxra/Apoe/Slc4a7/Plau/Egr1/Pik3r2/Rbpj/Erap1/Luzp1/Col4a2/Nfe2l2/Itgax/Jup/Lif/Pdgfb/Fgfr1/Kdr/Ngfr/Hipk2/Eng/Flt1/Lrp1/Il1b/Chd7/Myo1e/Ccr2/Ets1/Hbegf/Tgfbr1/Tlr3/Arhgap22/Plk2/Cx3cl1/Prkca/Itgb1/Tnfsf12/Egr3/Pdpn/Cysltr1/Hif1a/Sema4a/Cflar/C3ar1/Cd40/Clic4/Nr…
C0_cDC2	GO:0070304	positive regulation of stress-activated protein kinase signaling cascade	65	-2.09781	0.00026749	0.00252382	Gadd45g/App/Rell1/Hipk2/Il1b/Tnf/Sema4c/Tlr3/Lmnb1/Nod2/Gadd45b/Il1rn/Trf/Il1a/Fcgr2b/Dab2
C0_cDC2	GO:0048265	response to pain	10	-2.09986	0.00123789	0.00792039	Tspo/Ret/Gch1/Capn2/Comt/Calca/Runx1/Htr7
C0_cDC2	GO:0051222	positive regulation of protein transport	166	-2.10564	3.92072e-05	0.000543678	Rasgrp1/Nnat/Myo18a/Adrb1/Usp50/Tlr4/Il1rap/Il5/Ubr5/Tlr2/Csf1r/Irs2/Cd81/Adora2a/P2rx7/Jak2/Il17f/Il4ra/Pik3r2/Bag3/Jup/Prnp/Prr5l/Fyn/Oxct1/Prkcd/Casp4/F2r/Asph/Lrp1/Edem1/Il1b/Tnf/Gata3/Src/Cacnb3/Arid5a/Hif1a/Cd84/Clec5a/Nod2/Cd274/Wls/Ccl2/Cd14/Aif1/Ccr5/Ptger4/Cdh1/Il1rl1/Clec4n/Il1a/Mmp12/Cd209d
C0_cDC2	GO:0001562	response to protozoan	24	-2.10913	0.00118823	0.00768222	Arg1/Irgm2/Il4ra/Ier3/Gbp3/Gbp2b/Cd40/Il12b/Batf2/Gbp7/Iigp1/Gbp2
C0_cDC2	GO:0033002	muscle cell proliferation	94	-2.10936	0.000141781	0.00150808	Tgfbr2/Ctnnbip1/Sav1/Jak2/S1pr1/Npr1/Igf1r/Rxra/Ptgir/Egr1/Nampt/Rbpj/Gnaq/Nqo2/P2ry6/Tnfaip3/Pdgfb/Apod/Fgfr1/Tnf/Ptafr/Hbegf/Tgfbr1/Comt/Cx3cl1/Prkca/Hif1a/Cflar/C3ar1/Il12b/Cdkn1a/Trib1/Aif1/Nr4a3
C0_cDC2	GO:0050808	synapse organization	128	-2.11005	3.98883e-05	0.000543678	Itsn1/Klk8/Cyfip1/Il1rap/Lrp4/Tlr2/Srgn/Ophn1/Dbn1/Picalm/Il10ra/Vhl/Plxnd1/Pdlim5/Ptprs/Igf1r/Apoe/Cdc20/Palld/Synpo/Chchd10/Prnp/Fyn/App/Pdgfb/Cacnb2/F2r/Nectin1/Tnf/Arhgap22/Prkca/Cacnb3/Sema4a/Nfia/C1qc/Nrp2/Actn1/Igsf9/Afdn/C1qb/C1qa/Flrt3/Cdh1/Fcgr2b
C0_cDC2	GO:0007162	negative regulation of cell adhesion	111	-2.11006	0.000100817	0.00112282	Lrrc32/Cd74/Jak3/Arg1/Adora2a/Plxnd1/Jak2/Ass1/Nf1/Epcam/Il4ra/Cd86/Plxna4/Prnp/Tnfaip3/Nfkbid/Apod/Wnk1/Prkcd/Lrp1/Hfe/Cd80/Src/Slfn1/Mmp14/Runx1/Cd274/Sdc4/Scgb1a1/Il2ra/Pdcd1lg2/Adam15/Socs1/Plxna1/Il1rn/Cdh1/Mmp12/Plet1
C0_cDC2	GO:0046916	cellular transition metal ion homeostasis	37	-2.11085	0.000779177	0.0056164	Atox1/Sco2/Slc31a2/Slc39a10/Prnp/App/Hfe/Hif1a/Aplp2/Mt1/Slc30a4/Trf/Mt2
C0_cDC2	GO:0001944	vasculature development	260	-2.11147	1.92493e-05	0.000372134	Cav1/Wnt4/Epha2/Stab1/Ccl12/Dctn5/Gata2/Hhex/Pkd2/Pde2a/Tnfaip2/Plcg1/Pofut1/Tgfbr2/Thy1/Mmp19/Vhl/Plxnd1/Bmpr2/S1pr1/Il17f/Itga5/Nf1/Fn1/Rxra/Apoe/Slc4a7/Plau/Egr1/Pik3r2/Rbpj/Erap1/Luzp1/Col4a2/Nfe2l2/Itgax/Jup/Lif/Pdgfb/Fgfr1/Kdr/Ngfr/Hipk2/Eng/Flt1/Lrp1/Il1b/Chd7/Myo1e/Ccr2/Ets1/Hbegf/Tgfbr1/Tlr3/Arhgap22/Plk2/Cx3cl1/Prkca/Itgb1/Tnfsf12/Egr3/Pdpn/Cysltr1/Hif1a/Sema4a/Cflar/C3ar1/Cd40/Clic4/Nr…
C0_cDC2	GO:0032411	positive regulation of transporter activity	39	-2.11288	0.000777262	0.0056164	Htt/Adrb1/Ank2/Pkd2/Ctss/P2ry6/Chchd10/Wnk1/Prkcd/Cacnb2/Alox5/Asph/Ptafr/Atp1b1/Kcne3/Cox17/Cacnb3/Ccl2/Stk39
C0_cDC2	GO:0007520	myoblast fusion	21	-2.11406	0.0010428	0.00696834	Cd81/Capn2/Il4ra/Ptgfrn/Ehd1/Cflar/Myof/Cxcl10/Cxcl9
C0_cDC2	GO:0010043	response to zinc ion	11	-2.1152	0.00111064	0.00726776	P2rx7/Ass1/Crip1/Mt1/Slc30a4/Mt2
C0_cDC2	GO:0032722	positive regulation of chemokine production	33	-2.11599	0.00105403	0.00702686	Tlr4/Tlr2/Csf1r/Cd74/Il4ra/Egr1/App/Lrp1/Il1b/Tnf/Tlr3/Adora2b/Cd84/Nod2/Aif1/Il1rl1/Il1a
C0_cDC2	GO:0000904	cell morphogenesis involved in differentiation	229	-2.11605	1.93285e-05	0.000372134	Cass4/Cask/Rac3/Micall2/Hexa/Zfpm1/Sipa1l3/Plod3/Zswim6/Cyfip1/Lrp4/Epha2/Ret/Dpysl2/Peak1/Csf1r/Braf/Scn1b/Vasp/Ophn1/B4galt5/Stxbp5/Sema6d/Dbn1/Picalm/Thy1/Plxnd1/Pdlim5/Ttc3/Bmpr2/Ptprs/Enah/Fn1/Nedd9/Igf1r/Plppr4/Apoe/Plxna4/Nsmf/Palld/Pip5k1c/Dock7/Lpar3/Fndc3b/Hrh2/Calr/Dock1/Apbb2/Fyn/App/Alcam/Ngfr/Lrp1/Nectin1/Gata3/Nbeal2/Sema4c/Src/Parvb/Prkca/Bhlhe22/Itgb1/Skil/Pdpn/B4galt6/Sema4a/Cli…
C0_cDC2	GO:0002819	regulation of adaptive immune response	91	-2.11635	0.000121753	0.00131977	Cd74/Jak3/Cd81/Arg1/Pvr/Nfkbiz/Pnp/P2rx7/Nectin2/Il4ra/Tnfaip3/Nfkbid/Hfe/Il1b/Tnf/Malt1/Ccr2/Gata3/Cd1d1/Arid5a/Cd40/Nod2/Rsad2/Cd274/Cd226/Il12b/Fcgr3/Il7r/Fcgr1/Il1rl1/Fcgr2b
C0_cDC2	GO:0014910	regulation of smooth muscle cell migration	31	-2.11731	0.00107731	0.00713186	Plau/Egr1/Rbpj/Dock7/P2ry6/Nfe2l2/Dock4/Pdgfb/Lrp1/Src/Plxna1/Trib1/Aif1/Nr4a3/Ptger4
C0_cDC2	GO:0022407	regulation of cell-cell adhesion	185	-2.11821	1.95324e-05	0.000372134	Zfp703/Clec4g/Ptpn2/Cav1/Wnt4/Bmp2/Stat5a/Lrrc32/Zbtb16/Cd74/Jak3/Cd81/Arg1/Tgfbr2/Adora2a/Thy1/Nfkbiz/Pnp/Jak2/Ass1/Epcam/Il4ra/Cd83/Cd86/Icam1/Icosl/Prnp/Tnfaip3/Nfkbid/Wnk1/Prkcd/Hfe/Il1b/Tnf/Cd80/Malt1/Ptafr/Ccr2/Gata3/Ets1/Src/Il1rl2/Cx3cl1/Prkca/Cd1d1/Egr3/Slfn1/Pdpn/Cd209e/Adam19/Tnfsf9/Runx1/Cd274/Il12b/Ccl2/Sdc4/Scgb1a1/Il2ra/Pdcd1lg2/Il7r/Socs1/Afdn/Il1rn/Aif1/Nr4a3/Ccr5/Cdh1
C0_cDC2	GO:0120193	tight junction organization	15	-2.11877	0.00123826	0.00792039	Tnf/Tgfbr1/Itgb1/Afdn/Cdh1/Cldn1
C0_cDC2	GO:0071347	cellular response to interleukin-1	39	-2.12048	0.000735248	0.00538171	Acod1/Fn1/Egr1/Mapk13/Cx3cl1/Rora/Ccl2/Ccl24/Il1rn/Il1a/Ccl22/Ccl17
C0_cDC2	GO:0032874	positive regulation of stress-activated MAPK cascade	64	-2.12056	0.000206386	0.00208702	Gadd45g/App/Rell1/Hipk2/Il1b/Tnf/Sema4c/Tlr3/Lmnb1/Nod2/Gadd45b/Il1rn/Trf/Il1a/Fcgr2b/Dab2
C0_cDC2	GO:0019884	antigen processing and presentation of exogenous antigen	21	-2.12073	0.0010428	0.00696834	Ifi30/Ap3b1/Psme2/H2-DMb2/H2-Ab1/H2-DMb1/Tap1/Mfsd6/Tapbp/Cd74/Cd1d1/Fcgr3/Fcgr1/Fcgr2b
C0_cDC2	GO:0010812	negative regulation of cell-substrate adhesion	18	-2.12156	0.00117113	0.00759366	Nf1/Apod/Lrp1/Src/Mmp14/Adam15/Mmp12/Plet1
C0_cDC2	GO:0002791	regulation of peptide secretion	195	-2.12182	1.95251e-05	0.000372134	Adra2a/Rasgrp1/Nnat/Myo18a/Adrb1/Itsn1/Usp50/Tlr4/S100a9/Rab11fip5/Il1rap/Rab8b/Il5/Ubr5/Ffar4/Tlr2/Srgn/Csf1r/Irs2/Lrrc32/Idua/Cd74/Adora2a/P2rx7/Jak2/Il17f/Fn1/Il4ra/Nucb2/Apoe/Birc5/Anxa4/Sct/Tnfaip3/Lif/Oxct1/Casp4/F2r/Lrp1/Hfe/Il1b/Chd7/Tnf/Gata3/Src/Cx3cl1/Arid5a/Hif1a/Cd84/Clec5a/Cd40/Nod2/Rsad2/Cd274/Wls/Cd14/Socs1/Tnfrsf9/Cd200r1/Aif1/Ccr5/Ptger4/Il1rl1/Clec4n/Il1a/Mmp12/Cd209d
C0_cDC2	GO:0042310	vasoconstriction	30	-2.12366	0.00107693	0.00713186	Bmpr2/Icam1/Hrh2/Dock4/Pdgfb/Alox5/F2r/Ptafr/Cx3cl1/Hrh1/Cysltr1/Hif1a/Tbxas1/Htr7
C0_cDC2	GO:0019229	regulation of vasoconstriction	27	-2.12704	0.00103895	0.00696834	Bmpr2/Icam1/Hrh2/Dock4/Pdgfb/Alox5/F2r/Ptafr/Cx3cl1/Hrh1/Cysltr1/Hif1a/Tbxas1
C0_cDC2	GO:0002449	lymphocyte mediated immunity	111	-2.12719	8.06533e-05	0.000929727	Cd55/Stat5a/Ctsc/Cd74/Cd81/Arg1/Pvr/Stx11/Pnp/P2rx7/Nectin2/Rftn1/Il4ra/Icam1/Icosl/Prkcd/Hfe/Il1b/Tnf/Malt1/Ccr2/Gata3/Cd1d1/Arid5a/Cd40/Nod2/Rsad2/C1qc/Cd226/Il12b/Serpinb9/Klrb1b/Fcgr3/Il7r/Fcgr1/C1qb/C1qa/Fcgr2b
C0_cDC2	GO:0099537	trans-synaptic signaling	195	-2.12821	1.95251e-05	0.000372134	Adrb1/Mctp1/Cyfip1/Il1rap/Snap23/Srgn/Sv2b/Slc12a7/Cep89/Braf/Exoc4/Ophn1/Celf4/Stxbp5/Dbn1/Plcg1/Daglb/Adora2a/P2ry1/Vhl/Stx11/P2rx7/Ptprs/Jak2/Pdlim4/Nf1/Apoe/Cdc20/Egr1/Nsmf/Cyth1/Synpo/Sct/Prnp/Hrh2/Kmo/Cav2/Fyn/App/Kdr/Cacnb2/Ngfr/F2r/Il1b/Tnf/Ccr2/Src/Adora2b/Pacsin2/Plk2/Cx3cl1/Prkca/Hrh1/Itgb1/Egr3/Cacnb3/Stx3/Tubb2b/Plat/Ccl2/Afdn/Htr7/Ptger4/Fabp5/Cdh1/Fcgr2b
C0_cDC2	GO:0060142	regulation of syncytium formation by plasma membrane fusion	13	-2.12896	0.0012192	0.00784307	Capn2/Il4ra/Ehd1/Cflar/Dcstamp/Cxcl10/Cxcl9
C0_cDC2	GO:0002443	leukocyte mediated immunity	148	-2.12903	3.95476e-05	0.000543678	Clec4g/Tlr4/Itgam/Snap23/Tlr2/Gata2/Cd55/Stat5a/Ctsc/Cd74/Jak3/Cd81/Arg1/Pvr/Stx11/Pnp/P2rx7/Nectin2/Rftn1/Il4ra/Icam1/Ms4a2/Icosl/Prkcd/Hfe/Il1b/Tnf/Malt1/Ptafr/Ccr2/Gata3/Cxcl1/Tlr3/Adora2b/Adora3/Cd1d1/Arid5a/Cd84/Cd40/Nod2/Rsad2/C1qc/Cd226/Il12b/Serpinb9/Klrb1b/Fcgr3/Il7r/Fcgr1/C1qb/Nr4a3/C1qa/Fcgr2b
C0_cDC2	GO:0051900	regulation of mitochondrial depolarization	10	-2.13162	0.000917744	0.00638426	Gclm/Tspo/Ppp2r3c/P2rx7/Kdr/Ngfr/Src/Got1
C0_cDC2	GO:0045907	positive regulation of vasoconstriction	19	-2.13195	0.00132055	0.00842295	Icam1/Hrh2/Pdgfb/Alox5/F2r/Ptafr/Hrh1/Cysltr1/Tbxas1
C0_cDC2	GO:0060393	regulation of pathway-restricted SMAD protein phosphorylation	14	-2.1335	0.00102645	0.00692429	Acvr1/Inhba/Bmp2/Bmpr2/Eng/Hfe/Tgfbr1/Pmepa1/Dab2
C0_cDC2	GO:0034329	cell junction assembly	80	-2.13379	0.00010202	0.00112844	Zfp703/Cav1/Wnt4/Epha2/Peak1/Ophn1/Tns1/Thy1/Itga5/Fn1/Myo9a/Jup/Apod/Kdr/Lrp1/Tnf/Src/Fscn1/Ctnna1/Prkca/Itgb1/Ctnnd1/Rhoc/Mmp14/Actn1/Sdc4/Afdn/Dst/Cdh1/Cldn1
C0_cDC2	GO:0007566	embryo implantation	20	-2.13423	0.00113352	0.00737026	Atr/Ddr1/Vmp1/Grn/Mmp9/Acod1/Rxra/Timp1/Calr/Lif/Klf9/Cdh1/Mmp12
C0_cDC2	GO:0010811	positive regulation of cell-substrate adhesion	39	-2.13424	0.000714241	0.0053143	Iqgap1/Cd3e/Cass4/Rac3/Wnt4/Braf/Dbn1/Thy1/Jak2/Itga5/Fn1/Nedd9/Jup/Hacd1/Calr/Dock1/Kdr/Csf1/Itgb1/Sdc4/Dab2
C0_cDC2	GO:0042832	defense response to protozoan	22	-2.13426	0.000934977	0.00645472	Arg1/Irgm2/Il4ra/Gbp3/Gbp2b/Cd40/Il12b/Batf2/Gbp7/Iigp1/Gbp2
C0_cDC2	GO:0072677	eosinophil migration	12	-2.13428	0.00106776	0.00710173	Cx3cl1/Hrh1/Ccl2/Ccl24/Ptger4/Ccl22
C0_cDC2	GO:0098742	cell-cell adhesion via plasma-membrane adhesion molecules	47	-2.13549	0.000416554	0.00355259	Il1rap/Ret/Bmp2/Tgfbr2/Pvr/Cd164/Ptprs/Nectin2/Itga5/Epcam/Palld/Tnfaip3/Alcam/Wnk1/Nectin1/Jaml/Cx3cl1/Igsf9/Il1rn/Flrt3/Cdh1/Cldn1
C0_cDC2	GO:0048659	smooth muscle cell proliferation	75	-2.13771	0.000204495	0.0020816	Tgfbr2/Ctnnbip1/Jak2/S1pr1/Npr1/Igf1r/Ptgir/Egr1/Nampt/Rbpj/Gnaq/Nqo2/P2ry6/Tnfaip3/Pdgfb/Apod/Tnf/Ptafr/Hbegf/Comt/Cx3cl1/Prkca/Hif1a/C3ar1/Il12b/Cdkn1a/Trib1/Aif1/Nr4a3
C0_cDC2	GO:0034330	cell junction organization	98	-2.14102	0.000141463	0.00150808	Zfp703/Cav1/Rab8b/Wnt4/Epha2/Peak1/Csf1r/Ophn1/Tns1/Thy1/Itga5/Fn1/Myo9a/Jup/Apod/Kdr/F2r/Lrp1/Nectin1/Tnf/Tgfbr1/Src/Fscn1/Ctnna1/Prkca/Itgb1/Ctnnd1/Rhoc/Mmp14/Actn1/Sdc4/Afdn/Mtss1/Dst/Cdh1/Cldn1
C0_cDC2	GO:0070613	regulation of protein processing	21	-2.14111	0.000936389	0.00645472	Cd55/Tnp2/Cfh/Birc3/Ctla2a/Il1b/Src/Fcmr/Ctnnd1/Mmp14/Cdh1
C0_cDC2	GO:2001234	negative regulation of apoptotic signaling pathway	87	-2.14141	8.12992e-05	0.000929727	Htt/Bcl2l2/Clu/Noc2l/Wnt4/Pih1d1/Ybx3/Sh3rf1/Bcl2a1c/Cd74/Bcl2a1b/Slc35f6/Icam1/Ddx3x/Nfe2l2/Tnfaip3/Fyn/Hyou1/Ier3/Bcl2a1d/Il1b/Tnf/Tgfbr1/Tmbim1/Src/Ctnna1/Cx3cl1/Fcmr/Hif1a/Cflar/Pea15a/Bcl2a1a/Dapk1/Dab2
C0_cDC2	GO:0050701	interleukin-1 secretion	25	-2.1437	0.000934441	0.00645472	Usp50/Tlr4/Tlr2/P2rx7/Tnfaip3/Casp4/Tmem106a/Nod2/Ccr5/Ptger4/Gbp5
C0_cDC2	GO:1901342	regulation of vasculature development	131	-2.14388	3.97891e-05	0.000543678	Wnt4/Epha2/Stab1/Gata2/Hhex/Plcg1/Tgfbr2/Plxnd1/Il17f/Itga5/Nf1/Egr1/Pik3r2/Erap1/Col4a2/Nfe2l2/Itgax/Jup/Lif/Pdgfb/Kdr/Ngfr/Hipk2/Eng/Flt1/Il1b/Ccr2/Ets1/Tlr3/Plk2/Cx3cl1/Prkca/Itgb1/Cysltr1/Hif1a/Sema4a/Cflar/C3ar1/Cd40/Runx1/Hk2/Tnfrsf12a/Ccl2/Spred1/Ccl24/Ptger4/Il1a/Cxcl10
C0_cDC2	GO:0048660	regulation of smooth muscle cell proliferation	74	-2.14563	0.000184604	0.00192042	Tgfbr2/Ctnnbip1/Jak2/S1pr1/Npr1/Igf1r/Ptgir/Egr1/Nampt/Rbpj/Gnaq/Nqo2/P2ry6/Tnfaip3/Pdgfb/Apod/Tnf/Ptafr/Hbegf/Comt/Cx3cl1/Prkca/Hif1a/C3ar1/Il12b/Cdkn1a/Trib1/Aif1/Nr4a3
C0_cDC2	GO:0090184	positive regulation of kidney development	12	-2.1462	0.000939629	0.00646137	Wnt4/Ret/Maged1/Egr1/Lif/Pdgfb/Gata3/Cflar/C3ar1
C0_cDC2	GO:0002685	regulation of leukocyte migration	82	-2.14689	0.000102116	0.00112844	Cd74/Cd81/Thy1/Bst1/Slamf8/Icam1/Calr/App/Apod/Wnk1/Kitl/Il1b/Csf1/Ptafr/Ccr2/Cx3cl1/Adora3/Ddt/Mmp14/C3ar1/Nod2/Ccl2/Cd200r1/Stk39/Ccl24/Aif1/Ccr1/Ptger4/Il1a/Cxcl10
C0_cDC2	GO:0023014	signal transduction by protein phosphorylation	296	-2.14704	1.91084e-05	0.000372134	Tlr4/Ptpn2/Prdm15/Cav1/Phlpp1/Epha2/Ret/Ccl12/Ffar4/Tlr2/Mdfic/Ulk4/Bmp2/Mid1/Csf1r/Braf/Maged1/Hipk3/Sh3rf1/Cd74/Cd81/P2ry1/P2rx7/Jak2/Pde8a/Nf1/Fn1/Map3k14/Igf1r/Apoe/Scimp/Pik3r2/Icam1/Stk40/Nqo2/P2ry6/Lpar3/Mapk13/Cav2/Lif/Gadd45g/App/Pdgfb/Wnk1/Prkcd/Fgfr1/Ece1/Kdr/Rell1/Ngfr/Hipk2/F2r/Flt1/Lrp1/Kitl/Inppl1/Il1b/Tnf/Tgfbr1/Sema4c/Tlr3/Src/Cx3cl1/Prkca/Dok2/Tmem106a/Lmnb1/Peli2/Ddt/Cd84/Cflar…
C0_cDC2	GO:0045834	positive regulation of lipid metabolic process	58	-2.1475	0.000206787	0.00208702	Wnt4/Sec14l2/Irs2/Cd74/Cd81/Dgat1/Capn2/Igf1r/Nucb2/Pla2g4a/Apoe/Sct/Pdgfb/Prkcd/Flt1/Il1b/Tnf/Src/Adora2b/Nod2/Nr4a3/Il1a/Dab2
C0_cDC2	GO:1904427	positive regulation of calcium ion transmembrane transport	30	-2.15054	0.000950229	0.00651848	Htt/Adrb1/Ank2/Pkd2/Plcg1/Thy1/P2ry6/Cacnb2/F2r/Asph/Atp1b1/Kcne3/Clec4b1/Cx3cl1/Cacnb3/Ramp3/Cxcl10
C0_cDC2	GO:0002696	positive regulation of leukocyte activation	153	-2.15451	3.9447e-05	0.000543678	Tlr4/Itgam/Cav1/Il5/Gata2/Ppp2r3c/Irs2/Stat5a/Ctsc/Zbtb16/Cd74/Jak3/Cd81/Tgfbr2/Thy1/Nfkbiz/Pnp/Nectin2/Bst1/Il4ra/Cd83/Cd86/Ms4a2/Icosl/Slc39a10/Atp11c/Nfkbid/Il1b/Cd80/Malt1/Ptafr/Havcr1/Ccr2/Gata3/Adora2b/Il1rl2/Adora3/Cd1d1/Egr3/Cd209e/Mmp14/Cd40/Nod2/Tnfsf9/Runx1/Cd274/Cd226/Il12b/Ccl2/Il2ra/Pdcd1lg2/Il7r/Socs1/Cdkn1a/Aif1/Nr4a3/Axl/Il1rl1
C0_cDC2	GO:0061900	glial cell activation	26	-2.15728	0.000869141	0.0061709	Clu/Tlr4/Tlr2/Ctsc/Adora2a/Jak2/Nampt/App/Lrp1/Il1b/Tnf/Tlr3/Cx3cl1/Aif1/C1qa
C0_cDC2	GO:0044060	regulation of endocrine process	15	-2.15793	0.00087532	0.00619747	Inhba/Adrb1/Rab11fip5/Rab8b/Lif/Fgfr1/F2r/Il1b/Runx1/Dab2
C0_cDC2	GO:0042445	hormone metabolic process	53	-2.15843	0.000310778	0.00283797	Igf1r/Egr1/Cyp2s1/Atp1a1/Fgfr1/Ece1/Hfe/Il1b/Tnf/Dhrs3/Selenom/Gata3/Comt/Hif1a/Vdr/Furin/Cpq/Aldh1a2/Dab2
C0_cDC2	GO:0150076	neuroinflammatory response	30	-2.15885	0.000865764	0.00616233	Clu/Tlr4/Tlr2/Ctsc/Adora2a/Jak2/Nampt/App/Lrp1/Il1b/Tnf/Tlr3/Cx3cl1/Cd200r1/Aif1/C1qa
C0_cDC2	GO:0032732	positive regulation of interleukin-1 production	28	-2.15955	0.000720782	0.0053447	Naip5/Usp50/Tlr4/Tlr2/P2rx7/Jak2/Egr1/Ifi204/App/Casp4/Malt1/Ifi211/Nod2/Ifi205/Ccr5
C0_cDC2	GO:0032940	secretion by cell	357	-2.16221	1.88754e-05	0.000372134	Adrb1/Mctp1/Itsn1/Usp50/Tlr4/Entpd1/Rab11fip5/Itgam/Il1rap/Kdm5b/Rab8b/Il5/Exoc3l4/Ubr5/Snap23/Ffar4/Tlr2/Dpysl2/Gata2/Srgn/Csf1r/Irs2/Braf/Exoc4/Lrrc32/Tnfaip2/Stxbp5/Idua/Plcg1/Adora2a/P2ry1/Dgat1/Stx11/Scamp1/P2rx7/Jak2/Il17f/Nf1/Fn1/Il4ra/Nucb2/Apoe/Birc5/Ms4a2/Rbpj/Plek/Cyth1/Pip5k1c/Anxa4/Sct/Kmo/Ralb/Tnfaip3/Lif/Oxct1/Fgfr1/Casp4/F2r/Eng/Syngr2/Isg15/Lrp1/Hfe/Il1b/Chd7/Tnf/Ptafr/Selenom/Cc…
C0_cDC2	GO:0042327	positive regulation of phosphorylation	369	-2.16225	1.88861e-05	0.000372134	Fam129a/Tlr4/Lrp4/Cav1/Ret/Il5/Ccl12/Ffar4/Tlr2/Mdfic/Pih1d1/Bmp2/Ppp2r3c/Mid1/Csf1r/Pkd2/Braf/Maged1/Sh3rf1/Cd74/Cd81/Tgfbr2/P2ry1/Bmpr2/P2rx7/Jak2/Irgm2/Pde8a/Itga5/Nedd9/Map3k14/Igf1r/Apoe/Scimp/Egr1/Icam1/Ddx3x/Dock7/Nqo2/P2ry6/Lpar3/Prnp/Ralb/Cav2/Prr5l/Lif/Gadd45g/Fyn/App/Pdgfb/Ccdc88a/Prkcd/Fgfr1/Kdr/Rell1/Ngfr/Hipk2/F2r/Eng/Flt1/Lrp1/Kitl/Hfe/Il1b/Tnf/Csf1/Cd80/Malt1/Hbegf/Tgfbr1/Sema4c/T…
C0_cDC2	GO:0014909	smooth muscle cell migration	34	-2.1635	0.00050603	0.00411784	Plau/Egr1/Rbpj/Dock7/P2ry6/Nfe2l2/Dock4/Pdgfb/Lrp1/Src/Plat/Plxna1/Trib1/Aif1/Nr4a3/Ptger4
C0_cDC2	GO:0000165	MAPK cascade	285	-2.16368	1.91832e-05	0.000372134	Tlr4/Ptpn2/Prdm15/Cav1/Phlpp1/Epha2/Ret/Ccl12/Ffar4/Tlr2/Mdfic/Ulk4/Bmp2/Mid1/Csf1r/Braf/Maged1/Hipk3/Sh3rf1/Cd74/Cd81/P2ry1/P2rx7/Jak2/Pde8a/Nf1/Fn1/Igf1r/Apoe/Scimp/Pik3r2/Icam1/Stk40/Nqo2/P2ry6/Lpar3/Mapk13/Cav2/Lif/Gadd45g/App/Pdgfb/Prkcd/Fgfr1/Ece1/Kdr/Rell1/Ngfr/Hipk2/F2r/Flt1/Lrp1/Kitl/Inppl1/Il1b/Tnf/Tgfbr1/Sema4c/Tlr3/Src/Cx3cl1/Prkca/Dok2/Tmem106a/Lmnb1/Peli2/Ddt/Cd84/Cflar/Timp2/Cd40/N…
C0_cDC2	GO:0010862	positive regulation of pathway-restricted SMAD protein phosphorylation	10	-2.16456	0.000597601	0.00474269	Acvr1/Inhba/Bmp2/Bmpr2/Eng/Hfe/Tgfbr1/Dab2
C0_cDC2	GO:0046330	positive regulation of JNK cascade	51	-2.16601	0.000352682	0.00311326	Gadd45g/App/Hipk2/Il1b/Tnf/Tlr3/Lmnb1/Nod2/Gadd45b/Il1rn/Trf/Il1a/Fcgr2b/Dab2
C0_cDC2	GO:0032414	positive regulation of ion transmembrane transporter activity	34	-2.16677	0.00050603	0.00411784	Htt/Adrb1/Ank2/Pkd2/Ctss/P2ry6/Chchd10/Wnk1/Cacnb2/Alox5/Asph/Ptafr/Atp1b1/Kcne3/Cox17/Cacnb3/Ccl2/Stk39
C0_cDC2	GO:0032611	interleukin-1 beta production	42	-2.16692	0.000501442	0.00411588	Naip5/Usp50/Tlr4/Tlr2/P2rx7/Jak2/Egr1/Ifi204/Tnfaip3/App/Casp4/F2r/Il1b/Malt1/Ifi211/Tmem106a/Nod2/Ifi205/Ccr5/Gbp5
C0_cDC2	GO:1903530	regulation of secretion by cell	270	-2.16827	1.91928e-05	0.000372134	Adrb1/Mctp1/Itsn1/Usp50/Tlr4/Entpd1/Rab11fip5/Itgam/Il1rap/Kdm5b/Rab8b/Il5/Ubr5/Snap23/Ffar4/Tlr2/Dpysl2/Gata2/Srgn/Csf1r/Irs2/Braf/Lrrc32/Stxbp5/Idua/Adora2a/P2ry1/P2rx7/Jak2/Il17f/Nf1/Fn1/Il4ra/Nucb2/Apoe/Birc5/Ms4a2/Cyth1/Anxa4/Sct/Kmo/Ralb/Tnfaip3/Lif/Oxct1/Fgfr1/Casp4/F2r/Lrp1/Hfe/Il1b/Chd7/Tnf/Ptafr/Ccr2/Gata3/Src/Adora2b/Cx3cl1/Prkca/Adora3/Arid5a/Hif1a/Cd84/Clec5a/Cd40/Nod2/Rsad2/Runx1/Cd…
C0_cDC2	GO:0032612	interleukin-1 production	49	-2.16848	0.000352983	0.00311326	Naip5/Usp50/Tlr4/Tlr2/P2rx7/Jak2/Egr1/Ifi204/Tnfaip3/App/Casp4/F2r/Il1b/Malt1/Ifi211/Cx3cl1/Tmem106a/Nod2/Ifi205/Ccr5/Ptger4/Gbp5
C0_cDC2	GO:0001525	angiogenesis	189	-2.1693	1.95607e-05	0.000372134	Tnfaip2/Plcg1/Pofut1/Tgfbr2/Thy1/Mmp19/Vhl/Plxnd1/S1pr1/Il17f/Itga5/Nf1/Fn1/Rxra/Plau/Pik3r2/Rbpj/Erap1/Col4a2/Nfe2l2/Itgax/Jup/Lif/Fgfr1/Kdr/Ngfr/Hipk2/Eng/Flt1/Il1b/Ccr2/Ets1/Hbegf/Tgfbr1/Tlr3/Arhgap22/Plk2/Cx3cl1/Prkca/Itgb1/Tnfsf12/Egr3/Cysltr1/Hif1a/Sema4a/C3ar1/Cd40/Clic4/Nrp2/Runx1/Hk2/Rora/Tnfrsf12a/Ccl2/Ramp3/Adam15/Mfge8/Spred1/Ccl24/Il1a/Cxcl10
C0_cDC2	GO:0030100	regulation of endocytosis	110	-2.17039	6.06122e-05	0.000749398	Siglece/Rab20/Lrp1/Hfe/Il1b/Tnf/Src/Pacsin2/Prkca/Itgb1/Hip1/Cd209b/Nod2/Ccl2/Pros1/Fcgr3/Cd14/Cd63/Mfge8/Fcgr1/Trf/Axl/Fcgr2b/Dab2
C0_cDC2	GO:0048514	blood vessel morphogenesis	217	-2.1715	1.9402e-05	0.000372134	Cav1/Wnt4/Epha2/Stab1/Ccl12/Gata2/Hhex/Tnfaip2/Plcg1/Pofut1/Tgfbr2/Thy1/Mmp19/Vhl/Plxnd1/Bmpr2/S1pr1/Il17f/Itga5/Nf1/Fn1/Rxra/Apoe/Plau/Pik3r2/Rbpj/Erap1/Col4a2/Nfe2l2/Itgax/Jup/Lif/Pdgfb/Fgfr1/Kdr/Ngfr/Hipk2/Eng/Flt1/Lrp1/Il1b/Chd7/Myo1e/Ccr2/Ets1/Hbegf/Tgfbr1/Tlr3/Arhgap22/Plk2/Cx3cl1/Prkca/Itgb1/Tnfsf12/Egr3/Cysltr1/Hif1a/Sema4a/C3ar1/Cd40/Clic4/Nrp2/Runx1/Hk2/Rora/Tnfrsf12a/Ccl2/Ramp3/Adam15/…
C0_cDC2	GO:0050729	positive regulation of inflammatory response	70	-2.17164	0.000184532	0.00192042	Kpna6/Tlr4/S100a9/Tlr2/Stat5a/Pde2a/Ctsc/Cd81/Nfkbiz/Ctss/Jak2/Il17f/Pla2g4a/Il1b/Tnf/Ccr2/Ets1/Tlr3/Adora2b/Prkca/Adora3/Ddt/Nod2/Fcgr3/Ccl24/Fcgr1/Ccr5/Ptger4/Il1rl1/Gbp5
C0_cDC2	GO:0010562	positive regulation of phosphorus metabolic process	387	-2.17183	1.87878e-05	0.000372134	Map2k3/Map4k1/Cd3e/Cass4/Apoc2/Glipr2/Cysltr2/Inhba/Adra2a/Psap/Vav3/Rasgrp1/Tnfrsf11a/Ccl9/Map4k5/Clu/Camkk1/Fam129a/Tlr4/Lrp4/Cav1/Ret/Il5/Ccl12/Ffar4/Tlr2/Mdfic/Pih1d1/Bmp2/Ppp2r3c/Mid1/Csf1r/Pkd2/Braf/Maged1/Sh3rf1/Cd74/Cd81/Tgfbr2/P2ry1/Bmpr2/P2rx7/Jak2/Irgm2/Pde8a/Itga5/Capn2/Nedd9/Map3k14/Igf1r/Apoe/Scimp/Egr1/Icam1/Plek/Nsmf/Ddx3x/Dock7/Nqo2/P2ry6/Slc39a10/Lpar3/Prnp/Ralb/Cav2/Prr5l/Lif/G…
C0_cDC2	GO:0045937	positive regulation of phosphate metabolic process	387	-2.17183	1.87878e-05	0.000372134	Map2k3/Map4k1/Cd3e/Cass4/Apoc2/Glipr2/Cysltr2/Inhba/Adra2a/Psap/Vav3/Rasgrp1/Tnfrsf11a/Ccl9/Map4k5/Clu/Camkk1/Fam129a/Tlr4/Lrp4/Cav1/Ret/Il5/Ccl12/Ffar4/Tlr2/Mdfic/Pih1d1/Bmp2/Ppp2r3c/Mid1/Csf1r/Pkd2/Braf/Maged1/Sh3rf1/Cd74/Cd81/Tgfbr2/P2ry1/Bmpr2/P2rx7/Jak2/Irgm2/Pde8a/Itga5/Capn2/Nedd9/Map3k14/Igf1r/Apoe/Scimp/Egr1/Icam1/Plek/Nsmf/Ddx3x/Dock7/Nqo2/P2ry6/Slc39a10/Lpar3/Prnp/Ralb/Cav2/Prr5l/Lif/G…
C0_cDC2	GO:0086001	cardiac muscle cell action potential	10	-2.17288	0.000576258	0.00459712	Dlg1/Cav1/Ank2/Scn1b/Rangrf/Nup155/Jup/Cacnb2/Kcne3
C0_cDC2	GO:0051046	regulation of secretion	288	-2.1741	1.91828e-05	0.000372134	Cask/Inhba/Otud5/Adra2a/Rasgrp1/Tnfrsf11a/Nnat/Myo18a/Sept4/Adrb1/Mctp1/Itsn1/Usp50/Tlr4/Entpd1/S100a9/Rab11fip5/Itgam/Il1rap/Kdm5b/Rab8b/Il5/Ubr5/Snap23/Ffar4/Tlr2/Dpysl2/Gata2/Srgn/Csf1r/Irs2/Braf/Lrrc32/Stxbp5/Idua/Cd74/Adora2a/P2ry1/P2rx7/Jak2/Il17f/Nf1/Fn1/Il4ra/Nucb2/Apoe/Birc5/Ms4a2/Cyth1/Anxa4/Sct/Hrh2/Kmo/Ralb/Tnfaip3/Lif/Oxct1/Wnk1/Fgfr1/Casp4/F2r/Lrp1/Hfe/Il1b/Chd7/Tnf/Ptafr/Ccr2/Gata3…
C0_cDC2	GO:1902932	positive regulation of alcohol biosynthetic process	12	-2.17442	0.000704722	0.00526687	Wnt4/Sec14l2/P2ry1/P2ry6/Il1b/Tnf/Ptafr/Dab2
C0_cDC2	GO:0045446	endothelial cell differentiation	45	-2.17569	0.00037507	0.00326748	Plod3/Kdm6b/Apold1/Tjp1/Pde2a/Vhl/Bmpr2/Ptprs/Icam1/Rbpj/Kdr/Eng/Il1b/Tnf/Tgfbr1/Pdpn/Clic4/Tjp2/F11r/Afdn/Cldn1
C0_cDC2	GO:0007586	digestion	27	-2.17614	0.00076331	0.00555846	Adrb1/Tlr4/Dgat1/Epb41/Sct/Hrh2/Wnk1/Lima1/Nod2/Vdr/Tjp2/Cyp7b1/F11r/Stk39
C0_cDC2	GO:0001568	blood vessel development	247	-2.17764	1.9266e-05	0.000372134	Cav1/Wnt4/Epha2/Stab1/Ccl12/Dctn5/Gata2/Hhex/Pkd2/Pde2a/Tnfaip2/Plcg1/Pofut1/Tgfbr2/Thy1/Mmp19/Vhl/Plxnd1/Bmpr2/S1pr1/Il17f/Itga5/Nf1/Fn1/Rxra/Apoe/Plau/Egr1/Pik3r2/Rbpj/Erap1/Luzp1/Col4a2/Nfe2l2/Itgax/Jup/Lif/Pdgfb/Fgfr1/Kdr/Ngfr/Hipk2/Eng/Flt1/Lrp1/Il1b/Chd7/Myo1e/Ccr2/Ets1/Hbegf/Tgfbr1/Tlr3/Arhgap22/Plk2/Cx3cl1/Prkca/Itgb1/Tnfsf12/Egr3/Cysltr1/Hif1a/Sema4a/Cflar/C3ar1/Cd40/Clic4/Nrp2/Runx1/Hk2…
C0_cDC2	GO:0046903	secretion	392	-2.18481	1.87526e-05	0.000372134	Adra2a/Optn/Rasgrp1/Tnfrsf11a/Htt/Nnat/Myo18a/Sept4/Adrb1/Mctp1/Itsn1/Usp50/Tlr4/Entpd1/S100a9/Rab11fip5/Itgam/Il1rap/Kdm5b/Cav1/Rab8b/Il5/Exoc3l4/Ubr5/Snap23/Ffar4/Tlr2/Dpysl2/Gata2/Srgn/Csf1r/Irs2/Stat5a/Braf/Exoc4/Lrrc32/Tnfaip2/Stxbp5/Idua/Cd74/Plcg1/Adora2a/P2ry1/Dgat1/Stx11/Scamp1/P2rx7/Jak2/Il17f/Nf1/Fn1/Il4ra/Nucb2/Pla2g4a/Apoe/Birc5/Ms4a2/Rbpj/Plek/Cyth1/Pip5k1c/Anxa4/Sct/Hrh2/Kmo/Ralb/T…
C0_cDC2	GO:0007167	enzyme linked receptor protein signaling pathway	279	-2.18694	1.91457e-05	0.000372134	Zfp703/Cyfip1/Ptpn2/Cav1/Wnt4/Epha2/Ret/Hspa5/Hhex/Bmp2/Ptpn12/Csf1r/Irs2/Stat5a/Nup93/Lrrc32/Jak3/Plcg1/Tgfbr2/Bmpr2/Jak2/Npr1/Il17f/Igf1r/Soga1/Ltbp3/Nucb2/Ptgir/Egr1/Pik3r2/Rbpj/Col4a2/Smurf1/Cav2/Lif/Fyn/App/Pdgfb/Apod/Itgb5/Prkcd/Fgfr1/Kdr/Nceh1/Ngfr/Hipk2/Eng/Flt1/Lrp1/Inppl1/Hfe/Il1b/Csf1/Ski/Myo1e/Gata3/Hbegf/Tgfbr1/Src/Nrep/Sulf2/Prkca/Dok2/Csrnp1/Hip1/Skil/Hif1a/Htra3/Chst11/Aplp2/Furin…
C0_cDC2	GO:0050727	regulation of inflammatory response	148	-2.18712	3.95476e-05	0.000543678	Kpna6/Tlr4/S100a9/Ptpn2/Ffar4/Tlr2/Cd55/Stat5a/Pde2a/Ctsc/Cd81/Adora2a/Acod1/Nfkbiz/Ctss/Jak2/Il17f/Bst1/Sbno2/Pla2g4a/Apoe/Slamf8/Fndc4/Cfh/Tnfaip3/Apod/Ier3/Siglece/Ctla2a/Il1b/Tnf/Ccr2/Gata3/Ets1/Tlr3/Adora2b/Il1rl2/Cx3cl1/Prkca/Adora3/Ddt/Nod2/Rora/Il12b/Scgb1a1/Il2ra/Fcgr3/Socs3/Cd200r1/Stk39/Ccl24/Fcgr1/Ccr5/Ptger4/Il1rl1/Fcgr2b/Gbp5
C0_cDC2	GO:0050714	positive regulation of protein secretion	115	-2.18819	4.01776e-05	0.000543678	Rasgrp1/Nnat/Myo18a/Adrb1/Usp50/Tlr4/Il1rap/Il5/Tlr2/Csf1r/Irs2/Adora2a/P2rx7/Jak2/Il17f/Il4ra/Oxct1/Casp4/F2r/Lrp1/Il1b/Tnf/Gata3/Src/Arid5a/Hif1a/Cd84/Clec5a/Nod2/Cd274/Wls/Cd14/Aif1/Ccr5/Ptger4/Il1rl1/Clec4n/Il1a/Mmp12/Cd209d
C0_cDC2	GO:1900077	negative regulation of cellular response to insulin stimulus	20	-2.18967	0.000769938	0.00559239	Nucb2/Prkcd/Inppl1/Il1b/Prkca/Socs1/Socs3/Socs2/Cish
C0_cDC2	GO:0045621	positive regulation of lymphocyte differentiation	61	-2.1898	8.25849e-05	0.000929727	Ppp2r3c/Stat5a/Zbtb16/Cd74/Tgfbr2/Nfkbiz/Pnp/Il4ra/Cd83/Atp11c/Nfkbid/Il1b/Malt1/Ccr2/Gata3/Il1rl2/Cd1d1/Egr3/Mmp14/Tnfsf9/Runx1/Il2ra/Il7r/Socs1/Axl
C0_cDC2	GO:0033993	response to lipid	248	-2.19226	1.92537e-05	0.000372134	Cxcl2/Acod1/P2rx7/Pde4b/Jak2/Ass1/Irgm2/Npc1/Rxra/Sbno2/Pdia3/Ptgir/Cd86/Atp1a1/Zfp366/Plscr1/P2ry6/Litaf/Calr/Tnfaip3/F2r/Il1b/Tnf/Cd80/Malt1/Ptafr/Cxcl1/Tgfbr1/Src/Cx3cl1/Prkca/Arid5a/Cd84/Cflar/Nod2/Vdr/Runx1/Cd274/Rora/Fosl2/Cyp7b1/Il12b/Ccl2/Klf9/Ramp3/Pdcd1lg2/Adam15/Cd14/Socs2/Cxcl16/Htr7/Aldh1a2/Il1rn/Trib1/Ccr5/Ptger4/Axl/Tnip3/Gbp2/Mrc1/Dab2/Cxcl10/Cxcl9
C0_cDC2	GO:0019218	regulation of steroid metabolic process	41	-2.1936	0.000418953	0.00356236	Acadvl/Tspo/Wnt4/Bmp2/Sec14l2/Stat5a/Igf1r/Apoe/Egr1/Atp1a1/Il1b/Tnf/Adora2b/Hrh1/Ttc39b/Vdr/Rora/Il1a/Dab2
C0_cDC2	GO:0043269	regulation of ion transport	206	-2.19392	1.94598e-05	0.000372134	Adrb1/Zmpste24/Entpd1/Cav1/Tspo/Ccl12/Dpysl2/Fxyd2/Ank2/Pkd2/Irs2/Scn1b/Jak3/Plcg1/Gpr35/Arg1/Adora2a/Thy1/P2ry1/P2rx7/Ctss/Pde4b/Rangrf/Apoe/Icam1/Ms4a2/Gnaq/Epb41/Atp1a1/Rem1/Slc31a2/P2ry6/Lpar3/Chchd10/Prnp/Hrh2/Orai1/Kmo/Fyn/Pdgfb/Wnk1/Prkcd/Fgfr1/Cacnb2/Alox5/F2r/Asph/Hfe/Il1b/Chd7/Tnf/Ptafr/Atp1b1/Cxcl1/Kcne3/Clec4b1/Cox17/Cx3cl1/Prkca/Cacnb3/Mllt6/Cd84/Vdr/Clic4/Ccl2/Ramp3/Cd63/Htr7/Stk39/…
C0_cDC2	GO:0050678	regulation of epithelial cell proliferation	129	-2.19427	3.9874e-05	0.000543678	Zfp703/Kdm5b/Cav1/Ccl12/Gata2/Bmp2/Stat5a/Maged1/Plcg1/Arg1/Vhl/Bmpr2/Sav1/Nf1/Apoe/Birc5/Plau/Cav2/Tnfaip3/Pdgfb/Fgfr1/Kdr/Ngfr/Eng/Flt1/Jaml/Tnf/Gata3/Tgfbr1/Adora2b/Sulf2/Prkca/Egr3/Cflar/Nod2/Vdr/Cyp7b1/Ccl2/Klf9/Ccnd2/Aldh1a2/Ccl24/Mtss1/Nr4a3/Cdh1/Mmp12/Dab2
C0_cDC2	GO:0062013	positive regulation of small molecule metabolic process	52	-2.19622	0.000207232	0.00208702	Ptpn2/Wnt4/Sec14l2/Irs2/Cd74/P2ry1/Dgat1/P2rx7/Nucb2/Pla2g4a/P2ry6/App/Pdgfb/Il1b/Tnf/Ptafr/Src/Adora2b/Comt/Hif1a/Nr4a3/Ptger4/Dab2
C0_cDC2	GO:0010893	positive regulation of steroid biosynthetic process	13	-2.19783	0.000598905	0.00474269	Wnt4/Sec14l2/Igf1r/Il1b/Tnf/Adora2b/Il1a/Dab2
C0_cDC2	GO:2000241	regulation of reproductive process	48	-2.19842	0.000312032	0.00284029	P2ry1/Igf1r/Rxra/Timp1/Cdc20/Plau/Aspm/Lfng/Calr/Lif/Ptafr/Src/Runx1/Plat/Cdc25c/Ptger4/Il1a/Mmp12
C0_cDC2	GO:0097305	response to alcohol	43	-2.19857	0.000313303	0.00284275	Tgfbr2/Igf1r/Arsa/Eps8/P2ry6/Jup/Fyn/Tgfbr1/Ctnna1/Prkca/Klf9/Adam15/Htr7/Ccr5/Ptger4/Cdh1
C0_cDC2	GO:0048646	anatomical structure formation involved in morphogenesis	366	-2.20292	1.89018e-05	0.000372134	Nphs1/B4galt1/Hipk1/Jak1/Cybb/Cysltr2/Inhba/Rbm15/Phldb1/Wnt10b/Zfpm1/Vav3/Htt/Bcl3/Poglut1/Mafb/Fmnl3/Cnnm4/Kdm6b/Apold1/Mthfd1/Cav1/Wnt4/Epha2/Ret/Stab1/Ccl12/Tlr2/Gata2/Hhex/Tjp1/Exoc4/Vasp/Ophn1/Tnfaip2/Plcg1/Cd81/Pofut1/Ext2/Tgfbr2/Thy1/Mmp19/Vhl/Plxnd1/Bmpr2/Nectin2/S1pr1/Enah/Il17f/Itga5/Nf1/Capn2/Fn1/Rxra/Sbno2/Il4ra/Txnrd3/Plau/Pik3r2/Rbpj/Erap1/Hopx/Luzp1/Col4a2/Nfe2l2/Itgax/Jup/Lfng/Tn…
C0_cDC2	GO:0008285	negative regulation of cell proliferation	260	-2.2033	1.92493e-05	0.000372134	Clec4g/Ptpn2/Cav1/Tspo/Ccl12/Tlr2/Gata2/Bmp2/Csf1r/Lrrc32/Maged1/Zbtb16/Arg1/Tgfbr2/Adora2a/Vhl/Bmpr2/Ctnnbip1/Sav1/Jak2/Npr1/Nf1/Rxra/Tes/Ptgir/Apoe/Cd86/Rbpj/Dhcr24/Prnp/Cav2/Tnfaip3/Lif/App/Apod/Ngfr/F2r/Eng/Asph/Flt1/Inppl1/Il1b/Tnf/Cd80/Ski/Btg3/Gata3/Tgfbr1/Scin/Adora2b/Comt/Ctnna1/Prkca/Adora3/Itgb1/Slfn1/Pdpn/Timp2/Vdr/Camk2n1/Runx1/Cd274/Spint1/Il12b/Klf9/Sdc4/Scgb1a1/Il2ra/Pdcd1lg2/Tnfr…
C0_cDC2	GO:0070252	actin-mediated cell contraction	20	-2.20342	0.000641615	0.00493718	Adrb1/Cav1/Ank2/Scn1b/Dbn1/Pde4b/Nup155/Atp1a1/Jup/Cacnb2/Kcne3/Pdpn
C0_cDC2	GO:0002888	positive regulation of myeloid leukocyte mediated immunity	20	-2.20384	0.000641615	0.00493718	Itgam/Gata2/Arg1/Il4ra/Ms4a2/Ptafr/Cxcl1/Adora2b/Adora3/Fcgr3/Fcgr1
C0_cDC2	GO:1905330	regulation of morphogenesis of an epithelium	25	-2.20736	0.00046722	0.00387984	Wnt4/Maged1/Rxra/Itgax/Lif/Fgfr1/Tnf/Gata3/Cdh1/Dab2/Cxcl10
C0_cDC2	GO:0002793	positive regulation of peptide secretion	126	-2.20757	3.99114e-05	0.000543678	Rasgrp1/Nnat/Myo18a/Adrb1/Itsn1/Usp50/Tlr4/S100a9/Il1rap/Rab8b/Il5/Tlr2/Csf1r/Irs2/Adora2a/P2rx7/Jak2/Il17f/Il4ra/Sct/Lif/Oxct1/Casp4/F2r/Lrp1/Hfe/Il1b/Tnf/Gata3/Src/Arid5a/Hif1a/Cd84/Clec5a/Nod2/Cd274/Wls/Cd14/Aif1/Ccr5/Ptger4/Il1rl1/Clec4n/Il1a/Mmp12/Cd209d
C0_cDC2	GO:0060389	pathway-restricted SMAD protein phosphorylation	15	-2.20974	0.000533732	0.00431851	Acvr1/Inhba/Bmp2/Tgfbr2/Bmpr2/Eng/Hfe/Tgfbr1/Pmepa1/Dab2
[truncated: 2,094 more rows]

## Sheet: scRNAseq_Tcells_Markers
Clusters identified by Louvain algorithm using res.0.5
Marker Gene	p-value	average_log2FC	pct_in_cluster	pct_in_othercells	FDR	Cluster
Ly6c1	1.71371e-120	3.55798	0.251	0.011	3.18579e-116	C0_CD4
St8sia6	1.37229e-148	3.40199	0.333	0.02	2.55108e-144	C0_CD4
[truncated: 2,344 more rows]

## Sheet: DEGs_CD8Tcells_treat_vs_untreat
Cluster	Gene	p-value	average_log2FC(FL/αCD40 versus aIgG)	pct_in_FL/αCD40	pct_in_ aIgG	FDR
[truncated: 166 more rows]

[truncated: 1 more sheets: GSEA_GO_BioProcess_CD8Tcells]
